# Supplementary material for: Proteomic Profiling of Two Distinct Populations of Extracellular Vesicles Isolated from Human Seminal Plasma
Source: Int J Mol Sci. 2020 Oct 26;21(21):7957. doi: 10.3390/ijms21217957 (PMC7663558; doi:10.3390/ijms21217957)
Supplement: Supplementary file 1 [file ijms-21-07957-s001.zip › supplementary table 1.xlsx]

## Sheet: exp-1-LEV total
T: Gene names	T: Protein names	T: Fasta headers	T: Protein IDs	T: Majority protein IDs	N: Mol. weight [kDa]	iBAQ EXP-1-LEV	iBAQ EXP-1-SEV	N: Peptides	N: Razor + unique peptides	N: Unique peptides	N: Sequence coverage [%]	N: Unique + razor sequence coverage [%]	N: Unique sequence coverage [%]	N: Score	N: MS/MS count exp1 LEV	N: MS/MS count exp1 SEV	T: Gene names
CKB	Creatine kinase B-type	Creatine kinase B-type	P12277;G3V4N7;H0YJG0;H0YJK0;G3V2I1	P12277	42.644	31.3554	26.2189	53	53	41	87.1	87.1	68	323.31	189	54	CKB
MSMB	Beta-microseminoprotein	Beta-microseminoprotein	P08118	P08118	12.865	31.2352	25.087	6	6	6	24.6	24.6	24.6	19.221	9	1	MSMB
KLK3	Prostate-specific antigen	Prostate-specific antigen;Prostate-specific antigen (Fragment);Prostate-specific antigen;Prostate-specific antigen (Fragment);Kallikrein 3, (Prostate specific antigen), isoform CRA_d;Prostate-specific antigen (Fragment)	P07288;M0R1F0;Q8NCW4;M0QZF9;M0R294;M0R1Z7;M0QX57;A0A0B4J1X3	P07288;M0R1F0;Q8NCW4;M0QZF9;M0R294;M0R1Z7	28.741	31.1412	28.8013	26	26	25	88.9	88.9	88.9	323.31	69	54	KLK3
ACPP	Prostatic acid phosphatase;PAPf39	Prostatic acid phosphatase	P15309;H0Y8T3	P15309	44.566	31.0247	29.1108	33	33	22	53.4	53.4	44.3	323.31	76	68	ACPP
PPIA	Peptidyl-prolyl cis-trans isomerase A;Peptidyl-prolyl cis-trans isomerase A, N-terminally processed;Peptidyl-prolyl cis-trans isomerase	Peptidyl-prolyl cis-trans isomerase A;Peptidyl-prolyl cis-trans isomerase;Peptidyl-prolyl cis-trans isomerase	P62937;F8WE65;C9J5S7;P0DN26;A0A0H2UH34;A0A0B4J2A2;A0A075B767;A0A075B759;Q9Y536;F5H284;P0DN37;E5RIZ5	P62937;F8WE65;C9J5S7	18.012	31.0045	26.0261	24	24	24	95.2	95.2	95.2	138.02	59	23	PPIA
PEBP1	Phosphatidylethanolamine-binding protein 1;Hippocampal cholinergic neurostimulating peptide	Phosphatidylethanolamine-binding protein 1	P30086	P30086	21.057	30.7913	24.4172	24	24	24	96.3	96.3	96.3	323.31	63	9	PEBP1
ANXA1	Annexin A1;Annexin	Annexin A1;Annexin (Fragment)	P04083;Q5T3N1;Q5T3N0	P04083;Q5T3N1	38.714	30.6607	22.572	67	67	67	96.8	96.8	96.8	323.31	128	10	ANXA1
SORD	Sorbitol dehydrogenase	Sorbitol dehydrogenase	Q00796;H0YKB3	Q00796	38.324	30.514	25.0409	47	47	3	99.7	99.7	10.4	323.31	123	32	SORD
MIF	Macrophage migration inhibitory factor	Macrophage migration inhibitory factor	P14174	P14174	12.476	30.4424	20.4473	11	11	11	70.4	70.4	70.4	36.741	19	2	MIF
ADIRF	Adipogenesis regulatory factor	Adipogenesis regulatory factor	Q15847	Q15847	7.8547	30.2755	23.4613	9	9	8	92.1	92.1	92.1	323.31	26	1	ADIRF
S100A11	Protein S100-A11;Protein S100-A11, N-terminally processed	Protein S100-A11	P31949	P31949	11.74	30.1598	23.5075	17	17	17	91.4	91.4	91.4	225.01	18	3	S100A11
ACTG1	Actin, cytoplasmic 2;Actin, cytoplasmic 2, N-terminally processed	Actin, cytoplasmic 2;Actin, cytoplasmic 2 (Fragment);Actin, cytoplasmic 2 (Fragment)	P63261;I3L3I0;I3L1U9;I3L4N8;I3L3R2;J3KT65;K7EM38	P63261;I3L3I0;I3L1U9	41.792	30.1242	25.1701	50	50	2	93.3	93.3	7.2	323.31	137	36	ACTG1
HINT1	Histidine triad nucleotide-binding protein 1	Histidine triad nucleotide-binding protein 1;Histidine triad nucleotide-binding protein 1;Histidine triad nucleotide-binding protein 1;Histidine triad nucleotide-binding protein 1	P49773;D6REP8;D6RE99;D6RD60;D6RC06	P49773;D6REP8;D6RE99;D6RD60	13.802	30.1199	24.497	17	17	17	91.3	91.3	91.3	177.1	56	9	HINT1
CFL1	Cofilin-1	Cofilin-1;Cofilin-1;Cofilin 1 (Non-muscle), isoform CRA_a	P23528;E9PK25;G3V1A4	P23528;E9PK25;G3V1A4	18.502	30.1173	24.0538	30	30	2	98.8	98.8	12	299.78	54	13	CFL1
PLA2G2A	Phospholipase A2, membrane associated	Phospholipase A2, membrane-associated;Phospholipase A2, membrane associated	A0A3B3IRX2;P14555	A0A3B3IRX2;P14555	13.037	30.1147	25.3248	27	27	27	90.6	90.6	90.6	323.31	49	11	PLA2G2A
DBI	Acyl-CoA-binding protein	Acyl-CoA-binding protein;Acyl-CoA-binding protein;Acyl-CoA-binding protein	P07108;B8ZWD1;A0A0A0MTI5	P07108;B8ZWD1;A0A0A0MTI5	10.044	30.0991	20.4294	14	14	14	94.3	94.3	94.3	100.74	31	1	DBI
HSPB1	Heat shock protein beta-1	Heat shock protein beta-1;Heat shock protein beta-1	P04792;F8WE04;C9J3N8	P04792;F8WE04	22.782	30.0663	23.8536	26	26	26	94.1	94.1	94.1	293.49	64	16	HSPB1
GAPDH	Glyceraldehyde-3-phosphate dehydrogenase	Glyceraldehyde-3-phosphate dehydrogenase;Glyceraldehyde-3-phosphate dehydrogenase	P04406;E7EUT5	P04406;E7EUT5	36.053	29.9787	23.5432	43	43	43	97.6	97.6	97.6	323.31	84	19	GAPDH
IDH1	Isocitrate dehydrogenase [NADP] cytoplasmic	Isocitrate dehydrogenase [NADP] cytoplasmic	O75874;C9J4N6;C9JLU6;C9JJE5;P48735	O75874	46.659	29.9361	21.6037	64	64	64	98.6	98.6	98.6	323.31	119	9	IDH1
PRDX1	Peroxiredoxin-1	Peroxiredoxin-1;Peroxiredoxin-1 (Fragment)	Q06830;A0A0A0MSI0;A0A0A0MRQ5	Q06830;A0A0A0MSI0	22.11	29.823	23.8613	35	35	32	99.5	99.5	99.5	224.64	74	10	PRDX1
YWHAZ	14-3-3 protein zeta/delta	14-3-3 protein zeta/delta;14-3-3 protein zeta/delta (Fragment);14-3-3 protein zeta/delta (Fragment);cDNA, FLJ79516, highly similar to 14-3-3 protein zeta/delta	P63104;E7EX29;E7ESK7;B0AZS6;E9PD24;E7EVZ2;E5RIR4;B7Z2E6;H0YB80;E5RGE1	P63104;E7EX29;E7ESK7;B0AZS6	27.745	29.758	24.3005	39	39	28	98.4	98.4	80.4	323.31	60	12	YWHAZ
PARK7	Protein deglycase DJ-1	Protein/nucleic acid deglycase DJ-1;Protein/nucleic acid deglycase DJ-1;Protein/nucleic acid deglycase DJ-1 (Fragment)	Q99497;K7ELW0;K7EN27	Q99497;K7ELW0;K7EN27	19.891	29.7561	19.8506	28	28	28	97.9	97.9	97.9	288.02	48	3	PARK7
TPI1	Triosephosphate isomerase	Triosephosphate isomerase;Triosephosphate isomerase (Fragment)	P60174;U3KPZ0;U3KQF3;U3KPS5	P60174;U3KPZ0	30.791	29.7487	22.2817	42	42	42	81.8	81.8	81.8	323.31	85	7	TPI1
TUBB4B	Tubulin beta-4B chain	Tubulin beta-4B chain	P68371	P68371	49.83	29.5817	24.2991	43	43	3	70.6	70.6	7	323.31	79	14	TUBB4B
PFN1	Profilin-1	Profilin-1;Profilin	P07737;K7EJ44;CON__P02584;I3L3D5	P07737;K7EJ44	15.054	29.5694	23.707	24	24	24	97.1	97.1	97.1	221.35	47	10	PFN1
SOD1	Superoxide dismutase [Cu-Zn]	Superoxide dismutase [Cu-Zn];Superoxide dismutase [Cu-Zn]	P00441;H7BYH4	P00441;H7BYH4	15.936	29.5666	22.4119	16	16	16	96.1	96.1	96.1	323.31	35	2	SOD1
GSTP1	Glutathione S-transferase P	Glutathione S-transferase P;Glutathione S-transferase P	P09211;A8MX94;A0A087X2E9;A0A2R8Y5E5;A0A087X243	P09211;A8MX94	23.356	29.516	25.0689	16	16	16	62.4	62.4	62.4	323.31	42	17	GSTP1
ARHGDIA	Rho GDP-dissociation inhibitor 1	Rho GDP-dissociation inhibitor 1;Rho GDP-dissociation inhibitor 1 (Fragment);Rho GDP-dissociation inhibitor 1;Rho GDP-dissociation inhibitor 1 (Fragment);Rho GDP-dissociation inhibitor 1	P52565;J3KTF8;J3QQX2;J3KRY1;J3KRE2;J3KS60	P52565;J3KTF8;J3QQX2;J3KRY1;J3KRE2	23.207	29.5051	22.1924	23	23	23	96.6	96.6	96.6	201.85	41	1	ARHGDIA
MME	Neprilysin	Neprilysin	P08473;C9JR96;C9J9X7;C9IYX7;C9JDZ3;A0A087WWM7;Q3KQS6	P08473	85.513	29.5023	27.9149	97	97	97	70.9	70.9	70.9	323.31	154	98	MME
SEMG2	Semenogelin-2	Semenogelin-2	Q02383	Q02383	65.444	29.4829	31.4309	123	123	118	95.7	95.7	95.7	323.31	222	428	SEMG2
RHOA	Transforming protein RhoA	Transforming protein RhoA;Transforming protein RhoA;Rho-related GTP-binding protein RhoC (Fragment);Transforming protein RhoA (Fragment);Rho-related GTP-binding protein RhoC	P61586;C9JX21;Q5JR07;C9JNR4;Q5JR05;Q5JR06;E9PN11;E9PLA2	P61586;C9JX21;Q5JR07;C9JNR4;Q5JR05	21.768	29.4644	23.4256	19	19	8	76.2	76.2	28	190.24	46	7	RHOA
ANXA2	Annexin A2;Annexin;Putative annexin A2-like protein	Annexin A2;Annexin (Fragment);Putative annexin A2-like protein;Annexin (Fragment);Annexin;Annexin (Fragment);Annexin (Fragment)	P07355;H0YN42;A6NMY6;H0YMD0;H0YMU9;H0YM50;H0YKS4;H0YNP5;H0YMM1;H0YN28;H0YL33;H0YKZ7;H0YLV6;H0YMT9;H0YKX9;H0YKL9;H0YMW4;H0YKV8;H0YNA0;H0YMD9;H0YN52;H0YKN4;H0YNB8;H0YLE2	P07355;H0YN42;A6NMY6;H0YMD0;H0YMU9;H0YM50;H0YKS4	38.604	29.4577	19.6513	60	60	60	95.3	95.3	95.3	323.31	95	0	ANXA2
CALM2		Calmodulin-3;Calmodulin-2;Calmodulin-1;Calmodulin-2 (Fragment);Calmodulin-1;Calmodulin-2;Calmodulin 3 (Phosphorylase kinase, delta), isoform CRA_d;CALM1 protein	P0DP25;P0DP24;P0DP23;H0Y7A7;E7ETZ0;E7EMB3;M0QZ52;Q96HY3;F8WBR5;G3V479;G3V361;G3V226	P0DP25;P0DP24;P0DP23;H0Y7A7;E7ETZ0;E7EMB3;M0QZ52;Q96HY3	16.837	29.4498	NaN	11	11	10	67.1	67.1	67.1	321.74	41	0	CALM2
CNDP2	Cytosolic non-specific dipeptidase	Cytosolic non-specific dipeptidase;Cytosolic non-specific dipeptidase (Fragment)	Q96KP4;J3QKT2;J3KSV5;A0A087WYZ1;J3QKQ0;J3QRD0;J3QR27;J3QLU1;J3QRA8;J3QQN6;J3QL02;A0A087WVS2;J3QRH4;J3KSS4;J3QRP4;J3KRJ8	Q96KP4;J3QKT2	52.878	29.4057	23.3307	62	62	50	94.3	94.3	82.1	323.31	123	17	CNDP2
GLIPR2	Golgi-associated plant pathogenesis-related protein 1	Golgi-associated plant pathogenesis-related protein 1;Golgi-associated plant pathogenesis-related protein 1	Q9H4G4;Q5VZR0;A0A088AWP7;A0A087WUM5	Q9H4G4;Q5VZR0	17.218	29.3767	28.0151	25	25	25	98.1	98.1	98.1	242.17	55	25	GLIPR2
GLO1	Lactoylglutathione lyase	Lactoylglutathione lyase	Q04760	Q04760	20.777	29.3765	22.4551	24	24	24	96.7	96.7	96.7	135.48	35	9	GLO1
ALDOA	Fructose-bisphosphate aldolase A;Fructose-bisphosphate aldolase	Fructose-bisphosphate aldolase A;Fructose-bisphosphate aldolase;Fructose-bisphosphate aldolase;Fructose-bisphosphate aldolase A (Fragment);Fructose-bisphosphate aldolase A (Fragment);Fructose-bisphosphate aldolase A (Fragment)	P04075;J3KPS3;H3BQN4;H3BPS8;H3BUH7;H3BR04;H3BMQ8;H3BU78;H3BR68	P04075;J3KPS3;H3BQN4;H3BPS8;H3BUH7;H3BR04	39.42	29.3732	21.7528	53	53	46	99.7	99.7	84.1	323.31	86	6	ALDOA
FKBP1A	Peptidyl-prolyl cis-trans isomerase FKBP1A;Peptidyl-prolyl cis-trans isomerase	Peptidyl-prolyl cis-trans isomerase FKBP1A;Peptidylprolyl isomerase;Peptidylprolyl isomerase;Peptidylprolyl isomerase	P62942;Q5W0X3;Q1JUQ5;A0A087WZM5;Q5VVH2;Q1JUQ3;A0A087WTS4;A0A087WV48	P62942;Q5W0X3;Q1JUQ5;A0A087WZM5	11.951	29.3512	21.6871	11	11	11	92.6	92.6	92.6	66.299	30	0	FKBP1A
PGK1	Phosphoglycerate kinase 1	Phosphoglycerate kinase 1	P00558;P07205	P00558	44.614	29.3413	21.923	63	63	63	99.5	99.5	99.5	323.31	121	12	PGK1
EEF1A1	Elongation factor 1-alpha 1;Putative elongation factor 1-alpha-like 3;Elongation factor 1-alpha	Elongation factor 1-alpha 1;Putative elongation factor 1-alpha-like 3;Elongation factor 1-alpha 1;Elongation factor 1-alpha	P68104;Q5VTE0;A0A087WVQ9;A0A087WV01;A6PW80;Q5JR01	P68104;Q5VTE0;A0A087WVQ9;A0A087WV01	50.14	29.3332	25.4905	35	35	22	72.3	72.3	51.9	306.51	89	25	EEF1A1
RPS27A	Ubiquitin-40S ribosomal protein S27a;Ubiquitin;40S ribosomal protein S27a;Polyubiquitin-B;Ubiquitin;Polyubiquitin-C;Ubiquitin	Ubiquitin-40S ribosomal protein S27a;Polyubiquitin-B (Fragment);Ubiquitin-40S ribosomal protein S27a (Fragment);Polyubiquitin-C (Fragment);Polyubiquitin-C (Fragment);Polyubiquitin-C (Fragment);Polyubiquitin-C (Fragment);Polyubiquitin-B;Polyubiquitin-C (Fra	P62979;J3QS39;J3QTR3;F5H6Q2;F5GYU3;F5H2Z3;F5H265;B4DV12;F5H388;F5H747;F5GXK7;J3QKN0;Q5PY61;Q96C32;P0CG47;P0CG48;M0R1V7;Q49A90;A0A2R8Y422;F5GZ39;J3QSA3	P62979;J3QS39;J3QTR3;F5H6Q2;F5GYU3;F5H2Z3;F5H265;B4DV12;F5H388;F5H747;F5GXK7;J3QKN0;Q5PY61;Q96C32;P0CG47;P0CG48;M0R1V7;Q49A90;A0A2R8Y422	17.965	29.3142	25.5873	17	17	3	68.6	68.6	22.4	323.31	44	12	RPS27A
SFN	14-3-3 protein sigma	14-3-3 protein sigma	P31947	P31947	27.774	29.298	22.7363	35	30	30	92.3	89.5	89.5	323.31	58	7	SFN
BASP1	Brain acid soluble protein 1	Brain acid soluble protein 1	P80723	P80723	22.693	29.2394	20.9971	26	26	23	84.6	84.6	78.9	323.31	56	2	BASP1
CD59	CD59 glycoprotein	Uncharacterized protein;CD59 glycoprotein (Fragment);Uncharacterized protein;CD59 glycoprotein	E9PNW4;A0A2U3TZL5;E9PR17;P13987;H0YET2	E9PNW4;A0A2U3TZL5;E9PR17;P13987	11.985	29.19	26.1974	9	9	9	33.3	33.3	33.3	47.172	17	12	CD59
HSPA1B	Heat shock 70 kDa protein 1B;Heat shock 70 kDa protein 1A	Heat shock 70 kDa protein 1B;Heat shock 70 kDa protein 1B;Heat shock 70 kDa protein 1A;Heat shock 70 kDa protein 1A	A0A0G2JIW1;P0DMV9;P0DMV8;V9GZ37	A0A0G2JIW1;P0DMV9;P0DMV8;V9GZ37	70.108	29.1884	21.0966	70	63	42	75.1	75.1	55.6	323.31	137	7	HSPA1B
PRKAR2A	cAMP-dependent protein kinase type II-alpha regulatory subunit	cAMP-dependent protein kinase type II-alpha regulatory subunit	P13861;H7C1L0;H7C330;H7C4A9;C9J830	P13861	45.518	29.1858	21.937	53	53	48	98.5	98.5	96.3	323.31	106	13	PRKAR2A
HSPA8	Heat shock cognate 71 kDa protein	Heat shock cognate 71 kDa protein	P11142;E9PLF4;E9PQQ4;E9PQK7;E9PI65	P11142	70.897	29.1567	22.8514	71	71	0	74.8	74.8	0	323.31	138	19	HSPA8
PKM	Pyruvate kinase PKM;Pyruvate kinase	Pyruvate kinase PKM;Pyruvate kinase (Fragment);Pyruvate kinase;Pyruvate kinase	P14618;H3BTN5;B4DNK4;H3BQ34;H3BR70;H3BTJ2;H3BUW1;H3BT25;H3BU13;H3BN34;H3BQZ3;P30613	P14618;H3BTN5;B4DNK4;H3BQ34	57.936	29.1355	23.8155	63	63	63	92.5	92.5	92.5	323.31	131	32	PKM
ANXA5	Annexin A5;Annexin	Annexin A5;Annexin;Annexin	P08758;E9PHT9;D6RBL5;D6RBE9;D6RCN3	P08758;E9PHT9;D6RBL5	35.936	29.1251	19.9071	48	48	48	89.7	89.7	89.7	323.31	79	3	ANXA5
YWHAE	14-3-3 protein epsilon	14-3-3 protein epsilon	P62258;B4DJF2;I3L3T1;K7EIT4;K7EM20;I3L0W5	P62258	29.174	29.11	22.8803	32	29	29	83.5	79.6	79.6	218.37	53	4	YWHAE
NDRG1	Protein NDRG1	Protein NDRG1;Protein NDRG1	Q92597;E7ESM1;E5RJY1;E5RIR1;E5RGM5;E5RIM2;E5RI76;E5RIV1;E5RJ98;E5RH82;E5RK17;E5RG99	Q92597;E7ESM1	42.835	29.0925	22.4727	23	23	23	62.2	62.2	62.2	225.55	57	7	NDRG1
RAB3B	Ras-related protein Rab-3B	Ras-related protein Rab-3B	P20337;E9PI18;E9PJQ5;E9PRF7;E9PNB9;E9PS06;E9PMJ1;A8MSP2;A8MTC6;A8MZI4;B7Z3L0;Q15771;Q96AX2	P20337	24.758	29.069	24.0678	26	26	22	72.1	72.1	68.5	323.31	67	16	RAB3B
PRDX6	Peroxiredoxin-6	Peroxiredoxin-6	P30041	P30041	25.035	29.054	24.1531	35	35	35	92.4	92.4	92.4	279.41	54	10	PRDX6
ENO1	Alpha-enolase	Alpha-enolase;Alpha-enolase	P06733;A0A2R8Y6G6;K7EM90;A0A2R8YEM5;A0A2R8Y879;K7ERS8;A0A2R8Y6I8;A0A2R8Y798;A0A2R8YEG5;P13929;E5RI09;E5RG95;K7EPM1;K7EKN2;E5RGZ4;F5H1C3	P06733;A0A2R8Y6G6	47.168	29.0532	20.8667	67	67	61	97.9	97.9	90.8	323.31	112	6	ENO1
TUBA1B	Tubulin alpha-1B chain	Tubulin alpha-1B chain	P68363;F8VVB9;F8VS66;F8VRZ4;C9JDS9;F8VX09;F8VWV9;F8VRK0;F8W0F6;C9K0S6;F8VXZ7;Q9H853	P68363	50.151	28.9949	23.7066	45	45	0	83.4	83.4	0	323.31	86	25	TUBA1B
CDC42	Cell division control protein 42 homolog	Cell division control protein 42 homolog	P60953;Q5JYX0;A0A3B3IRV0;G3V4H1;G3V476;Q9H4E5	P60953	21.258	28.9276	22.1178	22	22	21	68.6	68.6	62.8	167.2	42	7	CDC42
PGAM1	Phosphoglycerate mutase 1	Phosphoglycerate mutase 1	P18669;Q8N0Y7;P15259	P18669	28.804	28.8979	22.5868	35	35	35	79.5	79.5	79.5	267.38	64	6	PGAM1
CD177	CD177 antigen	CD177 antigen;CD177 antigen	Q8N6Q3;A0A087WVM2;A0A087X113	Q8N6Q3;A0A087WVM2	46.363	28.8575	25.2575	19	19	19	41.9	41.9	41.9	168.82	25	18	CD177
GNB1	Guanine nucleotide-binding protein G(I)/G(S)/G(T) subunit beta-1	Guanine nucleotide-binding protein G(I)/G(S)/G(T) subunit beta-1;Guanine nucleotide-binding protein G(I)/G(S)/G(T) subunit beta-1 (Fragment);Guanine nucleotide-binding protein G(I)/G(S)/G(T) subunit beta-1	P62873;F6UT28;B3KVK2;F6X3N5;B1AKQ8;F5H8J8;F5H0S8;E9PCP0;P16520	P62873;F6UT28;B3KVK2	37.377	28.8321	22.6996	28	28	16	69.1	69.1	37.9	323.31	47	12	GNB1
NANS	Sialic acid synthase	Sialic acid synthase	Q9NR45;Q5TBR0;Q5TBR1	Q9NR45	40.307	28.8256	22.95	44	44	44	85.5	85.5	85.5	323.31	79	13	NANS
SEMG1	Semenogelin-1;Alpha-inhibin-92;Alpha-inhibin-31;Seminal basic protein	Semenogelin-1	P04279	P04279	52.13	28.7968	31.9246	108	103	103	94.6	94.6	94.6	323.31	174	370	SEMG1
RALB	Ras-related protein Ral-B	Ras-related protein Ral-B;Ras-related protein Ral-B (Fragment);Ras-related protein Ral-B (Fragment);Ras-related protein Ral-B (Fragment)	P11234;C9J6B1;C9JQB3;C9JYR1;F8WEQ6	P11234;C9J6B1;C9JQB3;C9JYR1	23.408	28.7547	21.7711	26	26	14	71.4	71.4	36.4	240.67	37	1	RALB
PHGDH	D-3-phosphoglycerate dehydrogenase	D-3-phosphoglycerate dehydrogenase;D-3-phosphoglycerate dehydrogenase;D-3-phosphoglycerate dehydrogenase;D-3-phosphoglycerate dehydrogenase;D-3-phosphoglycerate dehydrogenase;D-3-phosphoglycerate dehydrogenase (Fragment)	A0A286YF22;O43175;A0A2C9F2M7;A0A286YFL2;A0A286YFA2;A0A286YFM8;A0A286YFC8;A0A286YFB2;A0A286YER3;A0A286YF78;A0A286YF34;A0A286YFE1;A0A286YFF3;A0A286YFK5	A0A286YF22;O43175;A0A2C9F2M7;A0A286YFL2;A0A286YFA2;A0A286YFM8	55.938	28.7446	22.6407	43	43	43	66.7	66.7	66.7	323.31	76	13	PHGDH
YWHAQ	14-3-3 protein theta	14-3-3 protein theta	P27348	P27348	27.764	28.736	22.4079	33	27	3	78.4	70.6	20.4	281.02	43	6	YWHAQ
RAB3D	Ras-related protein Rab-3D	Ras-related protein Rab-3D	O95716;Q96E17	O95716	24.267	28.7331	24.321	24	21	17	68	64.4	47.9	287.25	62	9	RAB3D
PRDX2	Peroxiredoxin-2	Peroxiredoxin-2;Peroxiredoxin 2, isoform CRA_a	P32119;A6NIW5	P32119;A6NIW5	21.892	28.7044	21.0447	26	25	25	85.9	85.9	85.9	191.24	39	3	PRDX2
PSCA	Prostate stem cell antigen	Prostate stem cell antigen	O43653	O43653	11.959	28.6213	25.608	6	6	6	26.3	26.3	26.3	121.72	5	5	PSCA
VAMP8	Vesicle-associated membrane protein 8	Vesicle-associated membrane protein 8;Vesicle-associated membrane protein 8	Q9BV40;B8ZZT4;C9JXZ5	Q9BV40;B8ZZT4	11.438	28.5846	21.5765	11	11	11	64	64	64	154.7	17	2	VAMP8
SYTL1	Synaptotagmin-like protein 1	Synaptotagmin-like protein 1;Synaptotagmin-like protein 1	Q8IYJ3;A0A087X1N4;Q5SSC6	Q8IYJ3;A0A087X1N4	61.856	28.5591	21.6617	48	48	48	73.1	73.1	73.1	323.31	79	7	SYTL1
AKR1A1	Alcohol dehydrogenase [NADP(+)]	Alcohol dehydrogenase [NADP(+)]	P14550;Q5T621;V9GYG2;V9GYP9	P14550	36.573	28.5475	23.3099	43	43	43	92.9	92.9	92.9	323.31	68	11	AKR1A1
HSP90AA1	Heat shock protein HSP 90-alpha	Heat shock protein HSP 90-alpha	P07900;G3V2J8;Q14568;Q58FG0	P07900	84.659	28.5468	22.4574	76	76	59	70.5	70.5	56.3	323.31	136	11	HSP90AA1
PHPT1	14 kDa phosphohistidine phosphatase	14 kDa phosphohistidine phosphatase	Q9NRX4	Q9NRX4	13.832	28.5379	22.5807	17	17	17	90.4	90.4	90.4	180.05	48	2	PHPT1
ANXA3	Annexin A3;Annexin	Annexin A3;Annexin (Fragment)	P12429;D6RFG5;D6RCA8;D6RAZ8;D6RFJ9	P12429;D6RFG5	36.375	28.4958	21.4142	46	46	8	95.4	95.4	16.1	323.31	79	8	ANXA3
RAB27B	Ras-related protein Rab-27B	Ras-related protein Rab-27B;Ras-related protein Rab-27B (Fragment)	O00194;K7ES41;K7EJ38	O00194;K7ES41	24.608	28.48	20.9498	26	26	22	78	78	68.8	182.65	37	4	RAB27B
CMPK1	UMP-CMP kinase	UMP-CMP kinase;UMP-CMP kinase	P30085;Q5T0D2	P30085;Q5T0D2	22.222	28.444	21.5345	29	29	29	84.7	84.7	84.7	226.39	62	6	CMPK1
MDH1	Malate dehydrogenase, cytoplasmic;Malate dehydrogenase	Malate dehydrogenase, cytoplasmic;Malate dehydrogenase, cytoplasmic;Malate dehydrogenase, cytoplasmic;Malate dehydrogenase (Fragment)	P40925;B9A041;B8ZZ51;C9JF79;C9JRL4;C9JLV6	P40925;B9A041;B8ZZ51;C9JF79	36.426	28.4116	NaN	33	33	33	56	56	56	231.6	42	0	MDH1
CD9	Tetraspanin;CD9 antigen	Tetraspanin;Tetraspanin;Tetraspanin;CD9 antigen	A6NNI4;A0A2R8Y478;G8JLH6;P21926;A0A087WU13	A6NNI4;A0A2R8Y478;G8JLH6;P21926	17.764	28.3922	28.6262	11	11	11	44.7	44.7	44.7	93.291	11	12	CD9
GDI2	Rab GDP dissociation inhibitor beta	Rab GDP dissociation inhibitor beta;Rab GDP dissociation inhibitor (Fragment)	P50395;Q5SX87;V9GYF8;Q5SX90;Q5SX86;Q5SX91;V9GYJ7	P50395;Q5SX87	50.663	28.3715	21.344	48	48	37	84	84	70.1	323.31	89	8	GDI2
TPT1	Translationally-controlled tumor protein	Translationally-controlled tumor protein;Translationally-controlled tumor protein;Translationally-controlled tumor protein;Translationally-controlled tumor protein;Translationally-controlled tumor protein (Fragment)	Q5W0H4;A0A0B4J2C3;P13693;J3KPG2;E9PJF7;Q56UQ5;H0YCX0;Q9HAU6	Q5W0H4;A0A0B4J2C3;P13693;J3KPG2;E9PJF7	21.525	28.3381	21.9305	11	11	11	32.4	32.4	32.4	48.206	34	2	TPT1
ANPEP	Aminopeptidase N	Aminopeptidase N	P15144;H0YKT6;H0YLZ8;H0YMC1;H0YM04	P15144	109.54	28.3362	25.6701	84	84	84	57.5	57.5	57.5	323.31	105	53	ANPEP
MYL6	Myosin light polypeptide 6	Myosin light polypeptide 6;Myosin light polypeptide 6;Myosin light polypeptide 6;Myosin light polypeptide 6;Myosin light polypeptide 6;cDNA FLJ56329, highly similar to Myosin light polypeptide 6;Myosin light polypeptide 6 (Fragment)	F8W1R7;G3V1V0;P60660;J3KND3;G8JLA2;B7Z6Z4;F8VPF3;G3V1Y7;F8VZU9;F8W180;F8VXL3;H0YI43	F8W1R7;G3V1V0;P60660;J3KND3;G8JLA2;B7Z6Z4;F8VPF3	16.29	28.3224	21.6154	15	15	12	70.3	70.3	70.3	148.14	29	2	MYL6
TSTD1	Thiosulfate sulfurtransferase/rhodanese-like domain-containing protein 1	Thiosulfate:glutathione sulfurtransferase;Thiosulfate:glutathione sulfurtransferase	Q8NFU3;R4GNF9	Q8NFU3;R4GNF9	12.53	28.3135	22.5526	10	10	10	93	93	93	41.903	11	3	TSTD1
PRSS8	Prostasin;Prostasin light chain;Prostasin heavy chain	Prostasin	Q16651;H3BUJ8;H3BVC8	Q16651	36.431	28.3023	24.449	9	9	9	35	35	35	98.226	13	10	PRSS8
PRDX5	Peroxiredoxin-5, mitochondrial	Peroxiredoxin-5, mitochondrial	P30044	P30044	22.086	28.2817	22.0732	17	17	17	59.3	59.3	59.3	132.4	29	8	PRDX5
ESD	S-formylglutathione hydrolase	S-formylglutathione hydrolase;S-formylglutathione hydrolase;S-formylglutathione hydrolase (Fragment)	P10768;X6RA14;H7BZT7;U3KQT1	P10768;X6RA14;H7BZT7	31.462	28.2702	21.8302	29	29	29	96.1	96.1	96.1	271.5	56	3	ESD
SMS	Spermine synthase	Spermine synthase	P52788;H7C2R7	P52788	41.268	28.2467	22.3673	34	34	34	96.7	96.7	96.7	323.31	54	9	SMS
TXN	Thioredoxin	Thioredoxin	P10599	P10599	11.737	28.243	19.9685	15	15	15	99	99	99	75.982	33	0	TXN
CLIC1	Chloride intracellular channel protein 1	Chloride intracellular channel protein 1	O00299	O00299	26.922	28.2252	23.551	32	32	32	95.9	95.9	95.9	323.31	44	15	CLIC1
VAT1	Synaptic vesicle membrane protein VAT-1 homolog	Synaptic vesicle membrane protein VAT-1 homolog	Q99536;K7ERT7;K7ESA3;K7EJM4;K7ENX2;K7EM19	Q99536	41.92	28.1833	18.7888	28	28	28	69.2	69.2	69.2	288.17	50	0	VAT1
DDAH1	N(G),N(G)-dimethylarginine dimethylaminohydrolase 1	N(G),N(G)-dimethylarginine dimethylaminohydrolase 1;N(G),N(G)-dimethylarginine dimethylaminohydrolase 1	O94760;B4DYP1	O94760;B4DYP1	31.121	28.1831	18.8197	28	28	27	96.8	96.8	96.8	186.77	41	2	DDAH1
DCXR	L-xylulose reductase	L-xylulose reductase;L-xylulose reductase (Fragment);L-xylulose reductase (Fragment);L-xylulose reductase (Fragment)	Q7Z4W1;J3QS36;J3KS22;J3QL34;J3KRZ4;J3KSZ5;J3QS45;J3QRQ2	Q7Z4W1;J3QS36;J3KS22;J3QL34	25.913	28.1773	22.0643	29	29	29	84	84	84	174.55	40	2	DCXR
CSTB	Cystatin-B	Cystatin-B	P04080;A0A1W2PQG6;A0A1W2PS52	P04080	11.139	28.1702	22.1426	10	10	10	93.9	93.9	93.9	79.199	20	5	CSTB
LGALS3	Galectin-3;Galectin	Galectin-3;Galectin	P17931;G3V3R6	P17931;G3V3R6	26.152	28.1644	19.3925	15	15	15	39.2	39.2	39.2	70.531	27	1	LGALS3
ACAT2	Acetyl-CoA acetyltransferase, cytosolic	Acetyl-CoA acetyltransferase, cytosolic	Q9BWD1	Q9BWD1	41.35	28.1619	20.6267	32	32	32	83.9	83.9	83.9	323.31	62	2	ACAT2
KLK2	Kallikrein-2	Kallikrein-2	P20151;A0A075B7A6;M0R1T3;M0QXQ7;M0R0M4;M0R0M2	P20151	28.671	28.1601	27.4006	13	12	12	64.8	61.3	61.3	139.41	18	17	KLK2
TBCA	Tubulin-specific chaperone A	Tubulin-specific chaperone A;Tubulin-specific chaperone A;Tubulin-specific chaperone A;Tubulin-specific chaperone A	E5RJD8;O75347;E5RIW3;E5RHG6;E5RIX8	E5RJD8;O75347;E5RIW3;E5RHG6	14.306	28.1234	20.4447	12	12	12	68.9	68.9	68.9	65.216	17	0	TBCA
RAP1B	Ras-related protein Rap-1b;Ras-related protein Rap-1b-like protein	Ras-related protein Rap-1b;Ras-related protein Rap-1b (Fragment);Ras-related protein Rap-1b;Ras-related protein Rap-1b (Fragment);Ras-related protein Rap-1b (Fragment);Ras-related protein Rap-1b (Fragment);Ras-related protein Rap-1b;Ras-related protein Rap	P61224;E7ESV4;F5H7Y6;F5GX62;F5H004;F5H6R7;F5GYB5;A6NIZ1;F5H077;F5GWU8;F5H491;F5H0B7;F5H500;B7ZB78;F5H823;F5GZG1	P61224;E7ESV4;F5H7Y6;F5GX62;F5H004;F5H6R7;F5GYB5;A6NIZ1;F5H077;F5GWU8;F5H491;F5H0B7;F5H500	20.825	28.1118	20.523	19	19	8	94.6	94.6	43.5	99.866	27	1	RAP1B
ST13	Hsc70-interacting protein;Putative protein FAM10A5	Hsc70-interacting protein;Hsc70-interacting protein (Fragment);Hsc70-interacting protein;Putative protein FAM10A5	P50502;H7C3I1;Q3KNR6;Q8NFI4;F6VDH7;Q8IZP2;F8WAQ7	P50502;H7C3I1;Q3KNR6;Q8NFI4	41.331	28.1085	20.1456	21	21	21	35.2	35.2	35.2	238.03	37	2	ST13
ADH5	Alcohol dehydrogenase class-3	Alcohol dehydrogenase class-3	P11766;H0YAG8;D6RFE4;D6R9G2;D6RAY0	P11766	39.724	28.1061	22.8842	35	35	35	75.4	75.4	75.4	246.96	54	14	ADH5
GNB2	Guanine nucleotide-binding protein G(I)/G(S)/G(T) subunit beta-2	Guanine nucleotide-binding protein G(I)/G(S)/G(T) subunit beta-2;Guanine nucleotide-binding protein G(I)/G(S)/G(T) subunit beta-2;Guanine nucleotide-binding protein G(I)/G(S)/G(T) subunit beta-2 (Fragment);Guanine nucleotide-binding protein G(I)/G(S)/G(T)	P62879;E7EP32;C9JXA5;C9JZN1	P62879;E7EP32;C9JXA5;C9JZN1	37.331	28.0718	22.2377	27	16	5	77.1	55	23.5	162.28	27	6	GNB2
PAFAH1B2	Platelet-activating factor acetylhydrolase IB subunit beta	Platelet-activating factor acetylhydrolase IB subunit beta;Platelet-activating factor acetylhydrolase IB subunit beta (Fragment)	P68402;J3KNE3	P68402;J3KNE3	25.569	28.0586	20.9291	14	14	14	96.1	96.1	96.1	156.69	28	2	PAFAH1B2
CD38	ADP-ribosyl cyclase/cyclic ADP-ribose hydrolase 1	ADP-ribosyl cyclase/cyclic ADP-ribose hydrolase 1	P28907;H0Y950	P28907	34.328	28.05	23.3806	26	26	26	61.3	61.3	61.3	118.66	40	10	CD38
EIF5A	Eukaryotic translation initiation factor 5A;Eukaryotic translation initiation factor 5A-1;Eukaryotic translation initiation factor 5A-2;Eukaryotic translation initiation factor 5A-1-like	Eukaryotic translation initiation factor 5A (Fragment);Eukaryotic translation initiation factor 5A-1;Eukaryotic translation initiation factor 5A-1;Eukaryotic translation initiation factor 5A;Eukaryotic translation initiation factor 5A;Eukaryotic translatio	I3L397;I3L504;P63241;F8WCJ1;C9J7B5;C9J4W5;Q9GZV4;Q6IS14	I3L397;I3L504;P63241;F8WCJ1;C9J7B5;C9J4W5;Q9GZV4;Q6IS14	16.019	28.033	21.5717	15	15	15	85.6	85.6	85.6	112.01	28	4	EIF5A
MTPN	Myotrophin	Myotrophin	P58546;C9JL85	P58546	12.895	28.0307	21.2088	9	9	9	95.8	95.8	95.8	163.64	21	3	MTPN
DSTN	Destrin	Destrin;Destrin	P60981;F6RFD5	P60981;F6RFD5	18.506	28.0264	22.2406	22	18	18	84.2	77	77	136.89	34	6	DSTN
HEBP2	Heme-binding protein 2	Heme-binding protein 2	Q9Y5Z4;Q5THN1;C9IZA0	Q9Y5Z4	22.875	28.0231	NaN	21	21	21	75.1	75.1	75.1	274.05	41	0	HEBP2
FAM129A	Protein Niban	Protein Niban	Q9BZQ8;H0Y7M9;REV__Q9UHV5;REV__A0A087WVW6	Q9BZQ8	103.13	27.993	22.8716	72	72	72	60	60	60	323.31	94	16	FAM129A
YWHAG	14-3-3 protein gamma;14-3-3 protein gamma, N-terminally processed	14-3-3 protein gamma	P61981	P61981	28.302	27.9593	22.0155	34	28	24	89.9	86.6	83.4	323.31	48	5	YWHAG
NEDD8	NEDD8	NEDD8;NEDD8-MDP1 readthrough	Q15843;S4R3E9;F8VSA6;E9PS38	Q15843;S4R3E9	9.0714	27.9392	NaN	7	7	4	79	79	39.5	43.717	11	0	NEDD8
SYTL4	Synaptotagmin-like protein 4	Synaptotagmin-like protein 4	Q96C24	Q96C24	76.023	27.9217	21.1475	83	83	83	76.3	76.3	76.3	323.31	129	10	SYTL4
HSP90AB1	Heat shock protein HSP 90-beta	Heat shock protein HSP 90-beta	P08238;Q58FF7	P08238	83.263	27.916	21.8773	74	57	49	72.2	60.8	56.5	323.31	84	12	HSP90AB1
CORO1B	Coronin-1B	Coronin-1B	Q9BR76;A0A087WW53;F5H390;F5H0D2;J3QLV6;J3KSS5;Q6QEF8;A9Z1Z3	Q9BR76	54.234	27.9103	20.692	35	35	33	59.1	59.1	55.8	199.2	53	3	CORO1B
TMSB10	Thymosin beta-10	Thymosin beta-10	P63313;CON__P21752	P63313	5.0256	27.9072	NaN	4	4	4	68.2	68.2	68.2	10.102	6	0	TMSB10
CHMP5	Charged multivesicular body protein 5	Charged multivesicular body protein 5	Q9NZZ3	Q9NZZ3	24.57	27.8886	21.8066	17	17	17	57.5	57.5	57.5	152.3	27	3	CHMP5
TXNDC17	Thioredoxin domain-containing protein 17	Thioredoxin domain-containing protein 17;Thioredoxin domain-containing protein 17;Thioredoxin domain-containing protein 17;Thioredoxin domain-containing protein 17	Q9BRA2;I3L0K2;I3L3M7;I3L2R6	Q9BRA2;I3L0K2;I3L3M7;I3L2R6	13.941	27.878	21.2526	12	12	12	70.7	70.7	70.7	86.975	19	2	TXNDC17
CBR1	Carbonyl reductase [NADPH] 1	Carbonyl reductase [NADPH] 1	P16152;E9PQ63;A8MTM1	P16152	30.375	27.854	20.8737	37	37	35	90.6	90.6	85.9	323.31	50	2	CBR1
RAB11B	Ras-related protein Rab-11B;Ras-related protein Rab-11A	Ras-related protein Rab-11B;Ras-related protein Rab-11A (Fragment);Ras-related protein Rab-11A;Ras-related protein Rab-11A	Q15907;H3BMH2;H3BSC1;P62491;B4DQU5;M0R377;M0R2D0;H3BN38	Q15907;H3BMH2;H3BSC1;P62491	24.488	27.8336	20.0527	25	25	23	70.6	70.6	67	122.72	30	1	RAB11B
EZR	Ezrin	Ezrin;Ezrin	P15311;E7EQR4;E9PQ82;E9PNV3;A0A2R8Y5P0;E9PNP4	P15311;E7EQR4	69.412	27.8243	22.1556	74	74	60	83.1	83.1	70.1	323.31	91	13	EZR
PDCD6IP	Programmed cell death 6-interacting protein	Programmed cell death 6-interacting protein	Q8WUM4;A0A3B3IT07;C9IZF9;F8WEQ7;F8WBR8	Q8WUM4	96.022	27.8006	24.8996	97	97	87	75.6	75.6	68.3	323.31	121	51	PDCD6IP
GNG12	Guanine nucleotide-binding protein G(I)/G(S)/G(O) subunit gamma-12	Guanine nucleotide-binding protein G(I)/G(S)/G(O) subunit gamma-12	Q9UBI6	Q9UBI6	8.0061	27.7815	19.0129	12	12	12	91.7	91.7	91.7	66.037	11	0	GNG12
VCP	Transitional endoplasmic reticulum ATPase	Transitional endoplasmic reticulum ATPase	P55072	P55072	89.321	27.7656	20.8477	88	88	74	89.1	89.1	74.7	323.31	129	7	VCP
CNP	2,3-cyclic-nucleotide 3-phosphodiesterase	2,3-cyclic-nucleotide 3-phosphodiesterase	P09543;K7ERC4	P09543	47.578	27.7189	21.8682	47	47	29	81	81	51.5	323.31	73	9	CNP
DEFA3	Neutrophil defensin 3;HP 3-56;Neutrophil defensin 2;Neutrophil defensin 1;HP 1-56;Neutrophil defensin 2	Neutrophil defensin 3;Neutrophil defensin 1	P59666;P59665	P59666;P59665	10.245	27.703	24.3882	6	6	6	26.6	26.6	26.6	16.104	3	1	DEFA3
RAB27A	Ras-related protein Rab-27A	Ras-related protein Rab-27A;Ras-related protein Rab-27A (Fragment);Ras-related protein Rab-27A (Fragment);Ras-related protein Rab-27A (Fragment);Ras-related protein Rab-27A (Fragment);Ras-related protein Rab-27A (Fragment)	P51159;H3BVH7;H3BN55;H3BUD9;H3BS49;H3BU81	P51159;H3BVH7;H3BN55;H3BUD9;H3BS49;H3BU81	24.868	27.6626	23.1305	19	15	15	59.7	50.2	50.2	96.598	27	8	RAB27A
QDPR	Dihydropteridine reductase	Dihydropteridine reductase;Dihydropteridine reductase;Dihydropteridine reductase;Dihydropteridine reductase (Fragment)	P09417;B7Z415;D6RGG7;H0Y8F7;D6RHJ7	P09417;B7Z415;D6RGG7;H0Y8F7	25.789	27.6547	16.726	21	21	21	76.2	76.2	76.2	148.96	25	1	QDPR
TMSB4X	Thymosin beta-4;Hematopoietic system regulatory peptide	Thymosin beta-4	P62328	P62328	5.0526	27.6317	NaN	5	5	5	86.4	86.4	86.4	33.019	9	0	TMSB4X
MT1G	Metallothionein-1G	Metallothionein-1G	P13640;H3BSF1;P04731	P13640	6.1414	27.6188	NaN	9	9	3	100	100	41.9	59.444	12	0	MT1G
C11orf54	Ester hydrolase C11orf54	Ester hydrolase C11orf54;Ester hydrolase C11orf54;Ester hydrolase C11orf54 (Fragment);Uncharacterized protein;Ester hydrolase C11orf54 (Fragment);Ester hydrolase C11orf54 (Fragment)	Q9H0W9;A0A087WT99;E9PQS1;A0A1W2PRB8;E9PPB5;E9PJU8;E9PIP1;E9PLC5;E9PLB3	Q9H0W9;A0A087WT99;E9PQS1;A0A1W2PRB8;E9PPB5;E9PJU8	35.117	27.5904	16.6774	25	25	16	77.5	77.5	52.4	186.9	37	0	C11orf54
CLU	Clusterin;Clusterin beta chain;Clusterin alpha chain	Clusterin	P10909;H0YC35;H0YLK8;H0YAS8;E7ETB4;E5RJZ5;E5RGB0;E5RH61;E5RG36;CON__P17697	P10909	52.494	27.582	29.6626	53	53	33	57.9	57.9	39.2	323.31	46	101	CLU
VAMP3	Vesicle-associated membrane protein 3	Vesicle-associated membrane protein 3;Vesicle-associated membrane protein 2;Vesicle-associated membrane protein 3	Q15836;K7ENK9;K7EKX0;F5GZV7;P23763	Q15836;K7ENK9;K7EKX0	11.309	27.5763	19.1545	9	9	4	65	65	29	74.233	16	0	VAMP3
DDT	D-dopachrome decarboxylase;D-dopachrome decarboxylase-like protein	D-dopachrome decarboxylase;D-dopachrome decarboxylase;D-dopachrome decarboxylase;D-dopachrome decarboxylase-like protein	P30046;J3KQ18;B5MC82;A6NHG4;H7C342	P30046;J3KQ18;B5MC82;A6NHG4	12.712	27.5754	19.5464	13	13	13	72	72	72	67.355	15	0	DDT
DYNLRB1	Dynein light chain roadblock-type 1	Dynein light chain roadblock-type 1;Dynein light chain roadblock-type 1	Q9NP97;B1AKR6;Q8TF09;H3BNG9;H3BPA0;Q7Z4M1;H3BQI1	Q9NP97;B1AKR6	10.921	27.5531	17.7557	10	10	10	92.7	92.7	92.7	73.598	16	0	DYNLRB1
BLVRB	Flavin reductase (NADPH)	Flavin reductase (NADPH);Flavin reductase (NADPH)	P30043;A0A2R8YEP4;M0R192;A0A2R8Y7Y9;M0QZL1	P30043;A0A2R8YEP4	22.119	27.5281	21.279	19	19	19	94.7	94.7	94.7	244.53	41	1	BLVRB
TPD52	Tumor protein D52	Tumor protein D52;Uncharacterized protein	P55327;H0YC42;H0YC44;E5RK35	P55327;H0YC42	24.327	27.5269	NaN	22	22	13	79.9	79.9	60.3	323.31	33	0	TPD52
KIF5C	Kinesin heavy chain isoform 5C	Kinesin heavy chain isoform 5C;Kinesin-like protein (Fragment)	O60282;A0A0G2JMZ6;C9JWB9;A0A0C4DGP2;A0A0C4DGP5;Q86Y91	O60282;A0A0G2JMZ6	109.49	27.4982	21.4826	136	136	97	93.7	93.7	80.8	323.31	195	9	KIF5C
RAC1	Ras-related C3 botulinum toxin substrate 1	Ras-related C3 botulinum toxin substrate 1	P63000;P15153;B1AH77;B1AH78;B1AH80;B1AH79	P63000	21.45	27.4975	18.6698	14	13	7	65.1	65.1	36.5	75.158	17	1	RAC1
ABHD14B	Alpha/beta hydrolase domain-containing protein 14B	Protein ABHD14B;Protein ABHD14B;Protein ABHD14B	Q96IU4;F8W9U3;B4DQI4	Q96IU4;F8W9U3;B4DQI4	22.345	27.4833	21.7915	11	11	11	58.1	58.1	58.1	113.22	18	4	ABHD14B
TSPAN1	Tetraspanin-1	Tetraspanin-1	O60635	O60635	26.301	27.4739	24.9614	4	4	4	15.4	15.4	15.4	17.684	7	6	TSPAN1
TGM4	Protein-glutamine gamma-glutamyltransferase 4	Protein-glutamine gamma-glutamyltransferase 4	P49221;F8WCU8	P49221	77.144	27.4658	24.4042	80	80	80	95.3	95.3	95.3	323.31	85	35	TGM4
CUTA	Protein CutA	Protein CutA;Protein CutA	O60888;C9IZG4;C9IZQ5	O60888;C9IZG4	19.116	27.4625	20.8716	6	6	6	49.2	49.2	49.2	62.169	13	1	CUTA
RNH1	Ribonuclease inhibitor	Ribonuclease inhibitor	P13489;E9PMJ3;E9PLZ3;E9PIM9;H0YCR7;E9PIK5;E9PMN0;E9PMA9;E9PR82;E9PMI1	P13489	49.973	27.4568	22.1802	36	36	36	81.1	81.1	81.1	323.31	55	11	RNH1
YWHAB	14-3-3 protein beta/alpha;14-3-3 protein beta/alpha, N-terminally processed	14-3-3 protein beta/alpha;14-3-3 protein beta/alpha (Fragment);14-3-3 protein beta/alpha;14-3-3 protein beta/alpha (Fragment)	P31946;Q4VY19;A0A0J9YWE8;Q4VY20;A0A0J9YWZ2	P31946;Q4VY19;A0A0J9YWE8;Q4VY20	28.082	27.417	19.6077	29	16	16	88.2	66.7	66.7	228.48	26	1	YWHAB
ANXA4	Annexin A4	Annexin A4	P09525	P09525	35.882	27.4153	20.7597	36	36	4	84.3	84.3	8.5	215.34	64	4	ANXA4
EEF2	Elongation factor 2	Elongation factor 2	P13639;K7EJ74;K7EP67;Q15029	P13639	95.337	27.4103	20.9504	63	63	63	69.9	69.9	69.9	323.31	108	7	EEF2
UBE2L3	Ubiquitin-conjugating enzyme E2 L3	Ubiquitin-conjugating enzyme E2 L3;Ubiquitin-conjugating enzyme E2 L5	P68036;A0A1B0GUS4	P68036;A0A1B0GUS4	17.861	27.3962	17.3457	18	18	18	88.3	88.3	88.3	187.37	25	0	UBE2L3
CPM	Carboxypeptidase M	Carboxypeptidase M;Carboxypeptidase M (Fragment)	P14384;F8W111;F8VVI6;H0YHN7;F8VR29;F8VU13	P14384;F8W111	50.513	27.3782	23.289	23	23	23	43.8	43.8	43.8	110.23	42	14	CPM
PCBD1	Pterin-4-alpha-carbinolamine dehydratase	Pterin-4-alpha-carbinolamine dehydratase	P61457	P61457	11.999	27.3572	NaN	12	12	12	77.9	77.9	77.9	32.983	20	0	PCBD1
PFN2	Profilin-2;Profilin	Profilin-2;Profilin;Profilin	P35080;C9J712;C9J2N0;C9JQ45	P35080;C9J712;C9J2N0	15.046	27.3572	22.096	12	12	7	63.6	63.6	20	49.274	14	1	PFN2
RAB7A	Ras-related protein Rab-7a	Ras-related protein Rab-7a;Ras-related protein Rab-7a;Ras-related protein Rab-7a (Fragment);Ras-related protein Rab-7a (Fragment);Ras-related protein Rab-7a	P51149;C9J8S3;C9J592;C9IZZ0;C9J4V0;C9J4S4;C9J7D1	P51149;C9J8S3;C9J592;C9IZZ0;C9J4V0	23.489	27.3464	19.4271	22	22	22	86.5	86.5	86.5	197.22	28	2	RAB7A
FABP5	Fatty acid-binding protein, epidermal	Fatty acid-binding protein 5;Fatty acid-binding protein 5	Q01469;I6L8B7;A8MUU1	Q01469;I6L8B7	15.164	27.3342	18.4223	21	21	21	94.1	94.1	94.1	141.93	39	0	FABP5
PCBP1	Poly(rC)-binding protein 1	Poly(rC)-binding protein 1	Q15365;F8VTZ0;H3BSP4;C9K0A2;F8WC71;C9IZV9;C9J7A9;C9JSA6;C9J5V4;C9JTY5;C9JZY3;C9J0A4;P57723	Q15365	37.497	27.316	21.4281	25	25	18	89.6	89.6	78.4	323.31	39	4	PCBP1
NAPG	Gamma-soluble NSF attachment protein	Gamma-soluble NSF attachment protein	Q99747;J3KTJ6;J3QS28;J3QKW4	Q99747	34.746	27.2955	20.6915	39	39	39	80.8	80.8	80.8	216.45	53	4	NAPG
PTTG1IP	Pituitary tumor-transforming gene 1 protein-interacting protein	Pituitary tumor-transforming gene 1 protein-interacting protein;Pituitary tumor-transforming gene 1 protein-interacting protein	A8MXQ1;P53801;A8MZH8	A8MXQ1;P53801	18.331	27.2899	20.2505	4	4	4	22	22	22	9.5876	6	0	PTTG1IP
BANF1	Barrier-to-autointegration factor;Barrier-to-autointegration factor, N-terminally processed	Barrier-to-autointegration factor	O75531	O75531	10.058	27.2891	22.2429	10	10	10	84.3	84.3	84.3	45.933	20	5	BANF1
CDC42SE2	CDC42 small effector protein 2	CDC42 small effector protein 2;CDC42 small effector protein 2	Q9NRR3;D6REL0	Q9NRR3;D6REL0	9.2234	27.2739	22.8256	4	4	4	90.5	90.5	90.5	40.824	5	1	CDC42SE2
RAB1A	Ras-related protein Rab-1A	Ras-related protein Rab-1A;Ras-related protein Rab-1A	P62820;E7END7;H0YLJ8;H0YL94	P62820;E7END7	22.677	27.2512	20.6991	28	28	14	96.1	96.1	54.6	270.25	44	5	RAB1A
FOLH1	Glutamate carboxypeptidase 2	Glutamate carboxypeptidase 2	Q04609;Q9HBA9;E9PMK6;E9PKM3;E9PKX5;J3KNJ3;Q9Y3Q0;E9PI29;E9PLV0;E9PJV2	Q04609	84.33	27.2443	25.4133	54	54	54	54.9	54.9	54.9	323.31	68	44	FOLH1
CAPZA1	F-actin-capping protein subunit alpha-1	F-actin-capping protein subunit alpha-1	P52907	P52907	32.922	27.2376	20.1076	26	26	19	93.7	93.7	81.1	286.19	33	2	CAPZA1
VAMP2	Vesicle-associated membrane protein 2	Vesicle-associated membrane protein 2;Vesicle-associated membrane protein 2;Uncharacterized protein (Fragment);Vesicle-associated membrane protein 2	J3QRU4;F8WCA0;L7N2F9;P63027	J3QRU4;F8WCA0;L7N2F9;P63027	12.251	27.2273	NaN	9	4	4	72.6	40.7	40.7	22.835	7	0	VAMP2
RAB5C	Ras-related protein Rab-5C	Ras-related protein Rab-5C;Uncharacterized protein;Uncharacterized protein (Fragment);Ras-related protein Rab-5C (Fragment)	P51148;K7ERI8;K7ERQ8;K7ENY4;F8VVK3;F8VWU4;F8VSF8;K7EIP6	P51148;K7ERI8;K7ERQ8;K7ENY4	23.482	27.2085	19.6445	18	18	13	81	81	58.8	105.58	19	1	RAB5C
ATP6V1G1	V-type proton ATPase subunit G 1	V-type proton ATPase subunit G 1	O75348;F2Z307;O95670	O75348	13.757	27.2068	19.3749	12	12	12	87.3	87.3	87.3	152.32	21	1	ATP6V1G1
HEBP1	Heme-binding protein 1	Heme-binding protein 1;Heme-binding protein 1 (Fragment);Heme-binding protein 1	Q9NRV9;A0A3B3IRV5;F5GWX2;H0YG71	Q9NRV9;A0A3B3IRV5;F5GWX2	21.097	27.2008	19.6598	20	20	20	92.6	92.6	92.6	141.67	32	0	HEBP1
LAMP1	Lysosome-associated membrane glycoprotein 1	Lysosome-associated membrane glycoprotein 1	P11279	P11279	44.882	27.1877	18.1607	13	13	13	19.4	19.4	19.4	110.23	18	0	LAMP1
ALDH9A1	4-trimethylaminobutyraldehyde dehydrogenase	4-trimethylaminobutyraldehyde dehydrogenase	P49189	P49189	53.801	27.1874	18.9719	36	36	36	61.9	61.9	61.9	323.31	44	2	ALDH9A1
UGDH	UDP-glucose 6-dehydrogenase	UDP-glucose 6-dehydrogenase	O60701	O60701	55.023	27.1536	19.3743	53	53	37	87.4	87.4	62.8	323.31	63	5	UGDH
CAPG	Macrophage-capping protein	Macrophage-capping protein;Macrophage-capping protein (Fragment);Macrophage-capping protein (Fragment)	P40121;E7ENU9;B8ZZL6;H7C0X8	P40121;E7ENU9;B8ZZL6	38.498	27.1494	NaN	19	19	19	60.6	60.6	60.6	128.16	31	0	CAPG
PACSIN2	Protein kinase C and casein kinase substrate in neurons protein 2	Protein kinase C and casein kinase substrate in neurons protein 2;Protein kinase C and casein kinase substrate in neurons protein 2 (Fragment)	Q9UNF0;A0A0U1RR22;B0QYG7;B0QYG8;H0Y923;F6U236;Q9BY11	Q9UNF0;A0A0U1RR22	55.738	27.1464	16.9824	49	49	49	65.8	65.8	65.8	310.41	67	1	PACSIN2
LAMTOR5	Ragulator complex protein LAMTOR5	Ragulator complex protein LAMTOR5;Ragulator complex protein LAMTOR5;Ragulator complex protein LAMTOR5;Hepatitis B virus x interacting protein	O43504;R4GMU8;E9PLX3;A0A0C4DGV4	O43504;R4GMU8;E9PLX3;A0A0C4DGV4	9.6138	27.1405	NaN	5	5	5	96.7	96.7	96.7	60.125	8	0	LAMTOR5
EPHX2	Bifunctional epoxide hydrolase 2;Cytosolic epoxide hydrolase 2;Lipid-phosphate phosphatase	Bifunctional epoxide hydrolase 2;Bifunctional epoxide hydrolase 2;Bifunctional epoxide hydrolase 2	P34913;E5RFU2;E5RFH6;H0YAW7;E5RI53	P34913;E5RFU2;E5RFH6	62.615	27.1389	20.9915	39	39	39	78.6	78.6	78.6	323.31	72	9	EPHX2
KLC2	Kinesin light chain 2	Kinesin light chain 2;Kinesin light chain 2	Q9H0B6;A8MZ87;A8MX29;E9PP09;C9JHT2;E9PM83;E9PQ02;E9PI24	Q9H0B6;A8MZ87	68.934	27.0979	22.8719	71	71	54	79.1	79.1	63.3	323.31	98	24	KLC2
RHOC	Rho-related GTP-binding protein RhoC	Rho-related GTP-binding protein RhoC (Fragment);Rho-related GTP-binding protein RhoC;Rho-related GTP-binding protein RhoC (Fragment)	Q5JR08;P08134;E9PQH6	Q5JR08;P08134;E9PQH6	21.523	27.0873	19.6846	17	6	6	78.2	28.7	28.7	13.909	7	1	RHOC
CAPZB		Capping protein (Actin filament) muscle Z-line, beta, isoform CRA_a;Capping protein (Actin filament) muscle Z-line, beta, isoform CRA_d	B1AK87;B1AK88	B1AK87;B1AK88	29.295	27.0853	18.15	22	22	5	66.2	66.2	9.2	104.63	37	0	CAPZB
ANXA11	Annexin A11	Annexin A11	P50995;H0Y6E1	P50995	54.389	27.0812	24.1762	48	48	46	57.6	57.6	57.6	258.88	52	18	ANXA11
FBP1	Fructose-1,6-bisphosphatase 1	Fructose-1,6-bisphosphatase 1;Fructose-1,6-bisphosphatase 1	P09467;A0A3B3IUC7;Q5VZC3	P09467;A0A3B3IUC7	36.842	27.0472	17.2939	30	30	28	71.3	71.3	66	307.57	39	0	FBP1
STARD10	PCTP-like protein	START domain-containing protein 10 (Fragment);START domain-containing protein 10;START domain-containing protein 10;START domain-containing protein 10 (Fragment);START domain-containing protein 10;START domain-containing protein 10 (Fragment);START domain-	F5H1Z6;Q9Y365;F5H8H3;F5H8G1;F5GY11;F5H0V7;H0YFF3;H0YGA9;F5GWK5;H0YH17;F5H5A8;F5H3G8;H0YGN8;F5GY07	F5H1Z6;Q9Y365;F5H8H3;F5H8G1;F5GY11;F5H0V7;H0YFF3	29.043	27.0366	18.9372	22	22	22	69.8	69.8	69.8	83.285	26	1	STARD10
TMPRSS2	Transmembrane protease serine 2;Transmembrane protease serine 2 non-catalytic chain;Transmembrane protease serine 2 catalytic chain	Transmembrane protease serine 2 (Fragment);Transmembrane protease serine 2	C9JKZ3;O15393;C9J5Y1;C9JB05	C9JKZ3;O15393	53.615	27.0299	27.0921	34	34	34	55.8	55.8	55.8	289.06	26	37	TMPRSS2
UBA1	Ubiquitin-like modifier-activating enzyme 1	Ubiquitin-like modifier-activating enzyme 1	P22314;Q5JRR6;Q5JRR9;Q5JRS0;Q5JRS2;Q5JRS1	P22314	117.85	27.0175	20.6667	75	75	62	72.7	72.7	64.1	323.31	96	13	UBA1
TOLLIP	Toll-interacting protein	Toll-interacting protein;Toll interacting protein, isoform CRA_b;Toll-interacting protein;Toll-interacting protein;Toll-interacting protein (Fragment)	Q9H0E2;E7EN89;F2Z2Y8;E9PP67;E9PQ25;E9PNS3	Q9H0E2;E7EN89;F2Z2Y8;E9PP67;E9PQ25	30.281	27.006	23.9878	22	22	22	70.8	70.8	70.8	83.047	28	7	TOLLIP
CHMP4B	Charged multivesicular body protein 4b	Charged multivesicular body protein 4b	Q9H444;P59074	Q9H444	24.95	26.9889	20.4745	18	18	17	58	58	54.5	95.183	23	4	CHMP4B
KIF5B	Kinesin-1 heavy chain	Kinesin-1 heavy chain	P33176	P33176	109.68	26.9715	20.9459	125	93	92	84.9	72.6	72.6	323.31	150	7	KIF5B
APRT	Adenine phosphoribosyltransferase	Adenine phosphoribosyltransferase;Adenine phosphoribosyltransferase (Fragment);Adenine phosphoribosyltransferase;Adenine phosphoribosyltransferase (Fragment)	P07741;H3BQF1;H3BQZ9;H3BQB1;H3BSW3	P07741;H3BQF1;H3BQZ9;H3BQB1	19.608	26.9713	17.4392	17	17	17	94.4	94.4	94.4	127.49	21	0	APRT
ORM1	Alpha-1-acid glycoprotein 1	Alpha-1-acid glycoprotein 1	P02763	P02763	23.511	26.9556	22.6786	8	8	6	29.4	29.4	23.4	24.003	16	3	ORM1
TAGLN2	Transgelin-2	Transgelin-2;Transgelin-2 (Fragment)	P37802;X6RJP6;C9J5W6;Q9UI15	P37802;X6RJP6	22.391	26.9446	18.4707	27	27	27	89.4	89.4	89.4	248.16	33	0	TAGLN2
CRACR2A	EF-hand calcium-binding domain-containing protein 4B	EF-hand calcium-binding domain-containing protein 4B;EF-hand calcium-binding domain-containing protein 4B (Fragment)	Q9BSW2;H7BXT2	Q9BSW2;H7BXT2	45.591	26.943	17.5201	45	45	41	72.2	72.2	68.9	323.31	65	1	CRACR2A
GLRX	Glutaredoxin-1	Glutaredoxin-1	P35754	P35754	11.776	26.9379	NaN	11	11	11	99.1	99.1	99.1	64.905	9	0	GLRX
NAPA	Alpha-soluble NSF attachment protein	Alpha-soluble NSF attachment protein;Alpha-soluble NSF attachment protein;Alpha-soluble NSF attachment protein (Fragment)	P54920;M0R0Y2;M0R2M1;M0R058;M0R0I4;M0R213;M0R027;M0QZM9;M0QZN5;M0R031	P54920;M0R0Y2;M0R2M1	33.232	26.9331	20.4804	37	37	33	96.9	96.9	84.7	323.31	43	7	NAPA
TPM4	Tropomyosin alpha-4 chain	Tropomyosin alpha-4 chain;Tropomyosin alpha-4 chain;Tropomyosin alpha-4 chain;Tropomyosin alpha-4 chain (Fragment)	P67936;A0A2R8Y5V9;A0A2R8YGX3;A0A2R8YH90	P67936;A0A2R8Y5V9;A0A2R8YGX3;A0A2R8YH90	28.521	26.9289	NaN	25	25	8	76.2	76.2	18.1	96.715	34	0	TPM4
KLC4	Kinesin light chain 4	Kinesin light chain 4	Q9NSK0;C9J8T5;H7C4M1;C9JXT5;C9JQU1;C9K0D5	Q9NSK0	68.639	26.9095	22.618	67	62	50	81.4	79.6	65.1	323.31	96	22	KLC4
SH3BGRL3	SH3 domain-binding glutamic acid-rich-like protein 3	SH3 domain-binding glutamic acid-rich-like protein 3;SH3 domain-binding glutamic acid-rich-like protein 3	Q5T123;Q9H299	Q5T123;Q9H299	9.3804	26.9084	19.3372	8	8	8	51.1	51.1	51.1	23.885	13	0	SH3BGRL3
CPE	Carboxypeptidase E	Carboxypeptidase E	P16870;D6RF88;C9JE88;D6R930;H0YAM0	P16870	53.15	26.8937	24.8454	32	32	32	48.9	48.9	48.9	229.96	42	32	CPE
AHCY	Adenosylhomocysteinase	Adenosylhomocysteinase	P23526	P23526	47.716	26.8829	19.8975	24	24	24	46.8	46.8	46.8	218.84	30	1	AHCY
CRYM	Ketimine reductase mu-crystallin	Ketimine reductase mu-crystallin;Ketimine reductase mu-crystallin (Fragment);Ketimine reductase mu-crystallin;Ketimine reductase mu-crystallin (Fragment)	Q14894;I3L325;I3L2W5;I3NI53;I3L3J9;I3L3Y1	Q14894;I3L325;I3L2W5;I3NI53	33.775	26.861	18.5315	20	20	20	75.8	75.8	75.8	128.89	27	0	CRYM
CAP1	Adenylyl cyclase-associated protein 1	Adenylyl cyclase-associated protein 1	Q01518;Q5T0R1;Q5T0R7;Q5T0R6;Q5T0R5;Q5T0R4;Q5T0R3;Q5T0R2;Q5T0S3;Q5T0R8	Q01518	51.901	26.8561	19.0659	48	48	30	79.6	79.6	46.9	323.31	71	1	CAP1
NUDT4	Diphosphoinositol polyphosphate phosphohydrolase 2	Diphosphoinositol polyphosphate phosphohydrolase 2;Diphosphoinositol polyphosphate phosphohydrolase 2 (Fragment);Diphosphoinositol polyphosphate phosphohydrolase 2 (Fragment);Diphosphoinositol polyphosphate phosphohydrolase 2	Q9NZJ9;F8VRL4;F8VRR0;A0A0C4DGJ4	Q9NZJ9;F8VRL4;F8VRR0;A0A0C4DGJ4	20.306	26.8532	21.1304	13	13	2	59.4	59.4	6.1	72.793	18	1	NUDT4
MYH9	Myosin-9	Myosin-9	P35579;Q5BKV1;B1AH99	P35579	226.53	26.8517	17.2178	196	196	166	73.8	73.8	67.2	323.31	252	2	MYH9
FASN	Fatty acid synthase;[Acyl-carrier-protein] S-acetyltransferase;[Acyl-carrier-protein] S-malonyltransferase;3-oxoacyl-[acyl-carrier-protein] synthase;3-oxoacyl-[acyl-carrier-protein] reductase;3-hydroxyacyl-[acyl-carrier-protein] dehydratase;Enoyl-[acyl-carrier-protein] reductase;Oleoyl-[acyl-carrier-protein] hydrolase	Fatty acid synthase;Fatty acid synthase	P49327;A0A0U1RQF0;A0A0U1RRG3;A0A1B0GTR5;J3KTF0	P49327;A0A0U1RQF0	273.42	26.8424	21.2862	158	158	158	66.4	66.4	66.4	323.31	203	32	FASN
SVIP	Small VCP/p97-interacting protein	Small VCP/p97-interacting protein	Q8NHG7	Q8NHG7	8.4426	26.8204	21.1386	7	7	7	54.5	54.5	54.5	25.318	7	1	SVIP
CAPS	Calcyphosin	Calcyphosin	Q13938	Q13938	30.24	26.8002	17.5194	15	15	2	39.3	39.3	4.4	54.606	17	0	CAPS
PTGES3	Prostaglandin E synthase 3	Prostaglandin E synthase 3;Prostaglandin E synthase 3	A0A087WYT3;Q15185;B4DDC6	A0A087WYT3;Q15185	19.155	26.7917	20.4964	11	11	11	35.4	35.4	35.4	97.058	14	1	PTGES3
RPLP1	60S acidic ribosomal protein P1	60S acidic ribosomal protein P1	P05386	P05386	11.514	26.7752	21.2101	3	3	3	56.1	56.1	56.1	26.403	5	2	RPLP1
PIP	Prolactin-inducible protein	Prolactin-inducible protein	P12273	P12273	16.572	26.7729	29.4966	19	19	19	77.4	77.4	77.4	207	20	81	PIP
COMT	Catechol O-methyltransferase	Catechol O-methyltransferase;Catechol O-methyltransferase (Fragment);Catechol O-methyltransferase	P21964;E7EMS6;E7EUU8;H7BZ45;F8WBW9	P21964;E7EMS6;E7EUU8	30.037	26.7686	21.9505	20	20	20	74.9	74.9	74.9	200.54	29	5	COMT
KRAS	GTPase KRas;GTPase KRas, N-terminally processed	GTPase KRas	P01116	P01116	21.656	26.7626	19.3833	13	13	6	77.2	77.2	24.9	89.733	15	2	KRAS
RAB13	Ras-related protein Rab-13	Ras-related protein Rab-13;Ras-related protein Rab-13	P51153;A0A087WWB9	P51153;A0A087WWB9	22.774	26.7521	18.9201	15	13	11	56.7	56.7	50.7	54.868	18	0	RAB13
CHMP1B	Charged multivesicular body protein 1b	Charged multivesicular body protein 1b	Q7LBR1	Q7LBR1	22.109	26.7448	21.9887	12	12	12	37.2	37.2	37.2	37.737	15	3	CHMP1B
TUBB8	Tubulin beta-8 chain	Tubulin beta-8 chain;Tubulin beta chain;Tubulin beta chain	Q3ZCM7;A0A075B736;Q5SQY0	Q3ZCM7;A0A075B736;Q5SQY0	49.775	26.7317	21.712	11	2	2	25.9	7.4	7.4	66.638	3	3	TUBB8
RAB2A	Ras-related protein Rab-2A	Ras-related protein Rab-2A;Ras-related protein Rab-2A	P61019;E9PKL7;H7C125;H0YD31;E9PE37;H0YDL5;A0A1D5RMT4	P61019;E9PKL7	23.545	26.7262	19.6119	21	21	9	77.4	77.4	39.6	235.31	28	3	RAB2A
NME1-NME2	Nucleoside diphosphate kinase	Nucleoside diphosphate kinase;NME1-NME2 readthrough;Nucleoside diphosphate kinase A	Q32Q12;J3KPD9;E7ERL0	Q32Q12;J3KPD9;E7ERL0	32.642	26.7225	16.405	15	15	0	67.8	67.8	0	87.883	25	0	NME1-NME2
GSTT1	Glutathione S-transferase theta-1	Glutathione S-transferase theta-1	P30711;A0A0G2JQD2;A0A0G2JQM0;A0A0G2JRN4	P30711	27.335	26.7183	21.2453	19	19	10	75	75	32.1	94.644	27	2	GSTT1
UCHL1	Ubiquitin carboxyl-terminal hydrolase isozyme L1;Ubiquitin carboxyl-terminal hydrolase	Ubiquitin carboxyl-terminal hydrolase isozyme L1;Ubiquitin carboxyl-terminal hydrolase;Ubiquitin carboxyl-terminal hydrolase;Ubiquitin carboxyl-terminal hydrolase	P09936;D6RE83;D6R974;D6R956;D6RF53	P09936;D6RE83;D6R974;D6R956	24.824	26.7166	18.8899	14	14	14	69.1	69.1	69.1	99.107	22	1	UCHL1
BRK1	Protein BRICK1	Protein BRICK1	Q8WUW1	Q8WUW1	8.7448	26.7119	19.2627	12	12	12	86.7	86.7	86.7	38.794	13	1	BRK1
ALDH1A3	Aldehyde dehydrogenase family 1 member A3	Aldehyde dehydrogenase family 1 member A3;Aldehyde dehydrogenase 1 family, member A3, isoform CRA_b	P47895;H0Y2X5;H0YKF9;H0YNQ3;B5MCI0;H0YMG7;P30837;O94788	P47895;H0Y2X5	56.108	26.7102	19.4787	45	45	45	76.6	76.6	76.6	288.77	41	2	ALDH1A3
SYT7	Synaptotagmin-7	Synaptotagmin-7	O43581;F5H8G7	O43581	45.501	26.7064	NaN	26	26	25	61.8	61.8	57.6	138.26	32	0	SYT7
S100A10	Protein S100-A10	Protein S100-A10	P60903	P60903	11.203	26.7046	NaN	5	5	5	67	67	67	25.979	7	0	S100A10
SNAP23	Synaptosomal-associated protein 23;Synaptosomal-associated protein	Synaptosomal-associated protein 23;Synaptosomal-associated protein (Fragment);Synaptosomal-associated protein (Fragment);Synaptosomal-associated protein 23;Synaptosomal-associated protein 23;Synaptosomal-associated protein (Fragment);Synaptosomal-associate	O00161;H3BM38;H3BR18;H3BNE1;H3BPJ0;H3BP15;H3BQY9;H3BV99;H3BNG6;H3BU94;H3BR99	O00161;H3BM38;H3BR18;H3BNE1;H3BPJ0;H3BP15;H3BQY9	23.354	26.6775	21.4604	17	17	17	63.5	63.5	63.5	196.51	25	2	SNAP23
PSMA1	Proteasome subunit alpha type-1;Proteasome subunit alpha type	Proteasome subunit alpha type-1;Proteasome endopeptidase complex;Proteasome subunit alpha type	P25786;F5GX11;B4DEV8	P25786;F5GX11;B4DEV8	29.555	26.6769	19.8588	24	24	24	81.7	81.7	81.7	267.31	35	2	PSMA1
MARCKSL1	MARCKS-related protein	MARCKS-related protein	P49006	P49006	19.529	26.674	NaN	7	7	7	61	61	61	156.9	12	0	MARCKSL1
TOM1L2	TOM1-like protein 2	TOM1-like protein 2;TOM1-like protein 2;TOM1-like protein 2	Q6ZVM7;B7Z2U2;F5H3S6;K7ENB0	Q6ZVM7;B7Z2U2;F5H3S6	55.556	26.6653	20.3552	31	31	31	73.6	73.6	73.6	267.76	50	6	TOM1L2
HINT3	Histidine triad nucleotide-binding protein 3	Histidine triad nucleotide-binding protein 3	Q9NQE9	Q9NQE9	20.361	26.6465	18.6405	11	11	11	72.5	72.5	72.5	41.346	18	0	HINT3
ATP6V1E1	V-type proton ATPase subunit E 1	V-type proton ATPase subunit E 1;V-type proton ATPase subunit E 1 (Fragment)	P36543;C9J8H1;Q96A05	P36543;C9J8H1	26.145	26.6449	16.8757	24	24	24	71.7	71.7	71.7	141.15	26	0	ATP6V1E1
LAP3	Cytosol aminopeptidase	Cytosol aminopeptidase	P28838;H0Y9Q1;H0Y983	P28838	56.166	26.6359	19.3599	43	43	43	77.1	77.1	77.1	323.31	69	3	LAP3
PPP1R7	Protein phosphatase 1 regulatory subunit 7	Protein phosphatase 1 regulatory subunit 7;Protein phosphatase 1 regulatory subunit 7 (Fragment);Protein phosphatase 1 regulatory subunit 7 (Fragment);Protein phosphatase 1 regulatory subunit 7 (Fragment);Protein phosphatase 1 regulatory subunit 7	Q15435;C9J177;H7C003;C9JD73;B5MBZ8;C9JRC4;H7C3Q5;H7C118	Q15435;C9J177;H7C003;C9JD73;B5MBZ8	41.564	26.6353	17.0363	33	33	33	69.2	69.2	69.2	323.31	41	1	PPP1R7
NOL3	Nucleolar protein 3	Nucleolar protein 3 (Fragment);Nucleolar protein 3 (Fragment);Nucleolar protein 3 (Fragment);Nucleolar protein 3	H3BM67;H3BUP2;H3BUN4;O60936;H3BQJ5;J3QLT7	H3BM67;H3BUP2;H3BUN4;O60936	14.924	26.6262	NaN	12	12	12	77.5	77.5	77.5	71.217	17	0	NOL3
ACTC1	Actin, alpha cardiac muscle 1;Actin, alpha skeletal muscle;Actin, gamma-enteric smooth muscle;Actin, aortic smooth muscle	Actin, alpha cardiac muscle 1;Actin, alpha skeletal muscle;Actin, gamma-enteric smooth muscle;Actin, aortic smooth muscle;Actin, alpha skeletal muscle	P68032;P68133;P63267;P62736;A6NL76;F8WB63;B8ZZJ2;C9JFL5;F6UVQ4;F6QUT6	P68032;P68133;P63267;P62736;A6NL76	42.019	26.6249	19.9132	27	5	5	45.1	9	9	59.741	28	4	ACTC1
WDR1	WD repeat-containing protein 1	WD repeat-containing protein 1	O75083;D6RD66	O75083	66.193	26.616	21.6508	51	51	51	83.5	83.5	83.5	323.31	56	8	WDR1
GGT1	Gamma-glutamyltranspeptidase 1;Gamma-glutamyltranspeptidase 1 heavy chain;Gamma-glutamyltranspeptidase 1 light chain;Putative gamma-glutamyltranspeptidase 3;Putative gamma-glutamyltranspeptidase 3 heavy chain;Putative gamma-glutamyltranspeptidase 3 light chain	Glutathione hydrolase 1 proenzyme;Glutathione hydrolase 1 proenzyme (Fragment);Putative glutathione hydrolase 3 proenzyme;Inactive glutathione hydrolase 2	P19440;E7ET76;A6NGU5;B5MCK8;P36268;E7ETR7;E7EVF8;E7ENJ5;E7EM62;E7ETJ6;E7ESL5;E7ETU4;E9PHP2;E7ERN9;E7ETN1;Q9BX51	P19440;E7ET76;A6NGU5;B5MCK8	61.409	26.6148	27.2239	36	36	29	39.5	39.5	27.1	147.01	25	43	GGT1
ATP6V1B2	V-type proton ATPase subunit B, brain isoform	V-type proton ATPase subunit B, brain isoform	P21281;H0YC04;C9JL73;P15313;C9JNS9;E5RGH6;H0YAT8;H0YC45;C9JZ02	P21281	56.5	26.6141	17.4218	41	41	41	83.8	83.8	83.8	221.88	51	1	ATP6V1B2
GNG4	Guanine nucleotide-binding protein G(I)/G(S)/G(O) subunit gamma-4	Guanine nucleotide-binding protein G(I)/G(S)/G(O) subunit gamma-4	P50150	P50150	8.3887	26.6026	20.5641	13	13	13	90.7	90.7	90.7	57.673	16	0	GNG4
PLIN3	Perilipin-3	Perilipin-3;Perilipin-3 (Fragment)	O60664;K7ERZ3;K7EL96;K7ER39	O60664;K7ERZ3	47.074	26.5836	17.4294	32	32	32	81.8	81.8	81.8	305.88	54	1	PLIN3
EHD1	EH domain-containing protein 1	EH domain-containing protein 1;EH domain-containing protein 1;EH domain-containing protein 1 (Fragment);EH domain-containing protein 1 (Fragment)	Q9H4M9;A0A024R571;C9JC03;C9J2Z4;C9JIJ3;C9IZH1;C9JDQ8	Q9H4M9;A0A024R571;C9JC03;C9J2Z4	60.626	26.5621	18.6881	42	42	33	86.7	86.7	62.2	248.02	58	0	EHD1
RAB6A	Ras-related protein Rab-6A	Ras-related protein Rab-6A	P20340;F5H3K7;F5GX61;C9JU14;J3KR73;C9JB90	P20340	23.593	26.5581	18.5755	17	17	7	63.5	63.5	34.6	61.271	22	0	RAB6A
SEC14L2	SEC14-like protein 2	SEC14-like protein 2;SEC14-like 2 (S. cerevisiae), isoform CRA_c	O76054;B3KRD8;H7C417;C9JZI9;F8WEE7;C9JTM4;C9JYY7;H7C4C6;H7C1K3;F8WED8;B5MC44	O76054;B3KRD8	46.145	26.5421	19.5491	36	36	33	76.2	76.2	66.3	323.31	43	1	SEC14L2
TIMP1	Metalloproteinase inhibitor 1	Metalloproteinase inhibitor 1;Metalloproteinase inhibitor 1;Metalloproteinase inhibitor 1 (Fragment)	Q5H9A7;P01033;H0Y789;Q5H9B5;Q5H9B4	Q5H9A7;P01033;H0Y789	16.057	26.5297	23.4438	10	10	10	82.5	82.5	82.5	72.174	15	8	TIMP1
GDI1	Rab GDP dissociation inhibitor alpha	Rab GDP dissociation inhibitor alpha	P31150;G5E9U5	P31150	50.582	26.5093	19.4498	41	30	30	75.8	62.4	62.4	302.46	41	2	GDI1
USP14	Ubiquitin carboxyl-terminal hydrolase 14;Ubiquitin carboxyl-terminal hydrolase	Ubiquitin carboxyl-terminal hydrolase 14;Ubiquitin carboxyl-terminal hydrolase 14	P54578;A6NJA2;J3QQT6;J3KS55	P54578;A6NJA2	56.068	26.5001	20.5513	38	38	37	72.5	72.5	72.5	274.78	54	6	USP14
IST1	IST1 homolog	IST1 homolog	P53990	P53990	39.75	26.499	19.0607	22	22	3	57.7	57.7	17	116.43	23	1	IST1
FAM177A1	Protein FAM177A1	Protein FAM177A1	Q8N128;G3V3Z5	Q8N128	23.757	26.4841	18.5259	10	10	1	52.6	52.6	12.2	69.312	13	1	FAM177A1
PGLS	6-phosphogluconolactonase	6-phosphogluconolactonase;6-phosphogluconolactonase (Fragment)	O95336;M0R261;M0R1L2;M0R0U3	O95336;M0R261	27.547	26.4816	20.1498	23	23	23	88	88	88	162.72	27	2	PGLS
TSPAN6	Tetraspanin-6	Tetraspanin-6;Tetraspanin-6;Tetraspanin-6	A0A087WYV6;A0A087WZU5;O43657	A0A087WYV6;A0A087WZU5;O43657	14.958	26.4512	NaN	9	9	9	36.4	36.4	36.4	79.871	18	0	TSPAN6
PTRHD1	Putative peptidyl-tRNA hydrolase PTRHD1	Putative peptidyl-tRNA hydrolase PTRHD1	Q6GMV3	Q6GMV3	15.805	26.4453	19.3429	9	9	9	71.4	71.4	71.4	46.497	10	0	PTRHD1
BCAS1	Breast carcinoma-amplified sequence 1	Breast carcinoma-amplified sequence 1;Breast carcinoma-amplified sequence 1 (Fragment)	O75363;H0Y542	O75363;H0Y542	61.708	26.4428	15.3567	34	34	6	46.1	46.1	10.6	323.31	63	0	BCAS1
STIP1	Stress-induced-phosphoprotein 1	Stress-induced-phosphoprotein 1	P31948;F5H783;F5GXD8;H0YGI8	P31948	62.639	26.4351	NaN	50	50	50	81.4	81.4	81.4	301.39	67	0	STIP1
PCMT1	Protein-L-isoaspartate O-methyltransferase;Protein-L-isoaspartate(D-aspartate) O-methyltransferase	Protein-L-isoaspartate O-methyltransferase;Protein-L-isoaspartate O-methyltransferase;Protein-L-isoaspartate(D-aspartate) O-methyltransferase;Protein-L-isoaspartate(D-aspartate) O-methyltransferase	A0A0A0MRJ6;H7BY58;P22061;F6S8N6;F8WDT3;F8WAV5;F8WAX2;H7C4X2	A0A0A0MRJ6;H7BY58;P22061;F6S8N6	30.315	26.4212	19.0467	14	14	12	58.2	58.2	49.5	191.07	26	0	PCMT1
TOM1	Target of Myb protein 1	Target of Myb protein 1;Target of Myb protein 1 (Fragment)	O60784;B0QY01;V9GYF4;B0QY02;Q6UW50;V9GZ68;H7BYN7;F8WE29;F8WAW7;F8WBB0;F8WB30	O60784;B0QY01	53.818	26.4073	19.5938	26	26	26	68.1	68.1	68.1	207.26	36	2	TOM1
GPI	Glucose-6-phosphate isomerase	Glucose-6-phosphate isomerase;Glucose-6-phosphate isomerase (Fragment);Glucose-6-phosphate isomerase;Glucose-6-phosphate isomerase (Fragment);Glucose-6-phosphate isomerase;Glucose-6-phosphate isomerase (Fragment);Glucose-6-phosphate isomerase (Fragment)	P06744;A0A0A0MTS2;A0A2U3TZU2;A0A0J9YXP8;A0A2R8Y6C7;A0A0J9YYH3;K7EQ48;A0A0J9YX90;K7EP41;K7EPY4;K7ERC6;K7ENA0;A0A0J9YXM3;K7ERK8;A0A2R8YF08;K7ELR7;A0A0J9YYI8;K7EIL4;A0A0J9YXH9;K7ESF4	P06744;A0A0A0MTS2;A0A2U3TZU2;A0A0J9YXP8;A0A2R8Y6C7;A0A0J9YYH3;K7EQ48	63.146	26.4055	19.1145	33	33	28	66.7	66.7	60	202.76	47	0	GPI
LAMTOR1	Ragulator complex protein LAMTOR1	Ragulator complex protein LAMTOR1;Ragulator complex protein LAMTOR1;Ragulator complex protein LAMTOR1;Ragulator complex protein LAMTOR1 (Fragment);Ragulator complex protein LAMTOR1	Q6IAA8;F5GX19;F5H3Y3;H0YFI1;F5H479	Q6IAA8;F5GX19;F5H3Y3;H0YFI1;F5H479	17.745	26.4038	NaN	6	6	6	65.2	65.2	65.2	41.88	11	0	LAMTOR1
RAB1B	Ras-related protein Rab-1B	Ras-related protein Rab-1B;Ras-related protein Rab-1B	Q9H0U4;E9PLD0;Q92928	Q9H0U4;E9PLD0	22.171	26.4029	20.0354	26	12	12	93	58.7	58.7	125.55	20	1	RAB1B
SERPINB6	Serpin B6	Serpin B6;Serpin B6;Serpin B6;Serpin B6	A0A024QZX5;A0A087X1N8;P35237;A0A2R8YD12;A0A2R8Y6A7;A0A2R8YDD0;A0A2R8Y517;A0A2R8Y5S1;A0A2R8Y6N4;A0A2R8Y7E5	A0A024QZX5;A0A087X1N8;P35237;A0A2R8YD12	43.024	26.4006	17.7345	39	39	39	85.8	85.8	85.8	304.48	50	0	SERPINB6
AKAP7	A-kinase anchor protein 7 isoforms alpha and beta;A-kinase anchor protein 7 isoform gamma	A-kinase anchor protein 7 isoforms alpha and beta;A-kinase anchor protein 7 isoform gamma;A-kinase anchor protein 7 isoform gamma	O43687;J3KN37;Q9P0M2	O43687;J3KN37;Q9P0M2	11.464	26.3718	NaN	8	8	8	55.8	55.8	55.8	55.85	9	0	AKAP7
AKR7A2	Aflatoxin B1 aldehyde reductase member 2	Aflatoxin B1 aldehyde reductase member 2;Aflatoxin B1 aldehyde reductase member 2 (Fragment)	O43488;H3BLU7;H7C5H7;Q8NHP1;H7C4Q7;O95154	O43488;H3BLU7	39.589	26.3674	19.9094	19	19	19	59.3	59.3	59.3	113.26	22	0	AKR7A2
CHMP6	Charged multivesicular body protein 6	Charged multivesicular body protein 6;Charged multivesicular body protein 6 (Fragment);Charged multivesicular body protein 6 (Fragment);Charged multivesicular body protein 6 (Fragment)	Q96FZ7;I3L4A1;I3L3E4;I3L4G8	Q96FZ7;I3L4A1;I3L3E4;I3L4G8	23.485	26.3636	19.29	9	9	9	31.3	31.3	31.3	65.464	11	0	CHMP6
LIN7C	Protein lin-7 homolog C	Protein lin-7 homolog C;Lin-7 homolog C (C. elegans), isoform CRA_b	Q9NUP9;G3V1D4	Q9NUP9;G3V1D4	21.834	26.3512	19.4565	13	13	10	61.4	61.4	53.3	90.786	17	1	LIN7C
PTGR1	Prostaglandin reductase 1	Prostaglandin reductase 1;Prostaglandin reductase 1	Q14914;F2Z3J9;Q5JVP2;F6XGT7	Q14914;F2Z3J9	35.869	26.3468	20.4159	25	25	25	74.2	74.2	74.2	211.21	23	2	PTGR1
CSRP1	Cysteine and glycine-rich protein 1	Cysteine and glycine-rich protein 1;Cysteine and glycine-rich protein 1 (Fragment);Cysteine and glycine-rich protein 1;Cysteine and glycine-rich protein 1	P21291;E9PND2;E9PP21;E9PS42	P21291;E9PND2;E9PP21;E9PS42	20.567	26.3411	18.6294	13	13	13	68.4	68.4	68.4	157.11	15	0	CSRP1
LDHB	L-lactate dehydrogenase B chain;L-lactate dehydrogenase	L-lactate dehydrogenase B chain;Uncharacterized protein;L-lactate dehydrogenase (Fragment)	P07195;A0A3B3IS95;A8MW50;C9J7H8;F5H793;F5H5G7;F5H155;G3XAP5;F5H245;P07864	P07195;A0A3B3IS95;A8MW50	36.638	26.34	NaN	19	18	18	51.2	51.2	51.2	81.045	14	0	LDHB
CHMP3	Charged multivesicular body protein 3	Charged multivesicular body protein 3;RNF103-CHMP3 readthrough (Fragment)	Q9Y3E7;A0A140T963	Q9Y3E7;A0A140T963	25.073	26.3379	19.3639	12	12	12	63.1	63.1	63.1	32.338	15	0	CHMP3
RAB5B	Ras-related protein Rab-5B	Ras-related protein Rab-5B	P61020;F8VUA5	P61020	23.707	26.3313	18.4156	15	11	11	72.6	54.9	54.9	57.39	16	0	RAB5B
PDXK	Pyridoxal kinase	Pyridoxal kinase;Pyridoxal kinase	O00764;F2Z2Y4;A8MV33	O00764;F2Z2Y4	35.102	26.3271	19.422	25	25	25	92.6	92.6	92.6	261.79	26	4	PDXK
GPX1	Glutathione peroxidase;Glutathione peroxidase 1	Glutathione peroxidase;Glutathione peroxidase 1;Glutathione peroxidase 1	A0A087WUQ6;P07203;A0A2R8Y6B6	A0A087WUQ6;P07203;A0A2R8Y6B6	21.938	26.3256	18.3714	13	13	13	78.2	78.2	78.2	68.544	21	0	GPX1
SLC9A3R1	Na(+)/H(+) exchange regulatory cofactor NHE-RF1	Na(+)/H(+) exchange regulatory cofactor NHE-RF1	O14745;J3QRP6;J3QRA3	O14745	38.868	26.3251	20.1794	24	24	24	64.8	64.8	64.8	94.445	27	2	SLC9A3R1
TKT	Transketolase	Transketolase;Transketolase	P29401;A0A0B4J1R6;E9PFF2;F8W888;F8WAX4	P29401;A0A0B4J1R6	67.877	26.3159	16.0319	40	40	40	75.9	75.9	75.9	214.71	55	0	TKT
GRHPR	Glyoxylate reductase/hydroxypyruvate reductase	Glyoxylate reductase/hydroxypyruvate reductase;Glyoxylate reductase/hydroxypyruvate reductase	Q9UBQ7;U3KQ56	Q9UBQ7;U3KQ56	35.668	26.3136	20.3487	13	13	13	53	53	53	105.03	21	3	GRHPR
CCT3	T-complex protein 1 subunit gamma	T-complex protein 1 subunit gamma;T-complex protein 1 subunit gamma	P49368;B4DUR8;E9PRC8;Q5SZX6;E9PM09;Q5SZW8;Q5SZX9;E9PQ35	P49368;B4DUR8	60.533	26.3085	21.454	41	41	41	65.9	65.9	65.9	169	55	5	CCT3
KIAA0513	Uncharacterized protein KIAA0513	Uncharacterized protein KIAA0513;Uncharacterized protein KIAA0513 (Fragment)	O60268;H3BMU3;H3BNA7	O60268;H3BMU3	46.638	26.2992	16.3906	31	31	31	58.6	58.6	58.6	167.76	42	0	KIAA0513
GNAI3	Guanine nucleotide-binding protein G(k) subunit alpha	Guanine nucleotide-binding protein G(k) subunit alpha	P08754	P08754	40.532	26.297	19.9245	26	26	15	49.7	49.7	35.9	129.11	30	0	GNAI3
RAB14	Ras-related protein Rab-14	Ras-related protein Rab-14;Ras-related protein Rab-14 (Fragment)	P61106;X6RFL8	P61106;X6RFL8	23.897	26.293	19.7806	20	20	20	74	74	74	86.256	26	1	RAB14
GLOD4		Glyoxalase domain-containing protein 4	F6TLX2;I3L1I0	F6TLX2	54.719	26.28	17.8425	29	29	0	50.6	50.6	0	204.95	41	1	GLOD4
ALDH7A1	Alpha-aminoadipic semialdehyde dehydrogenase	Alpha-aminoadipic semialdehyde dehydrogenase;Alpha-aminoadipic semialdehyde dehydrogenase;Alpha-aminoadipic semialdehyde dehydrogenase;Alpha-aminoadipic semialdehyde dehydrogenase;Alpha-aminoadipic semialdehyde dehydrogenase;Alpha-aminoadipic semialdehyde	A0A1B0GTG2;A0A1B0GW77;P49419;A0A1B0GTY9;A0A1B0GUA1;A0A1B0GW82;A0A1B0GTJ4;A0A1B0GV49;A0A0J9YWF7;A0A1B0GUY0;F8WDY6;H0YHM6;F8VVF2;A0A1B0GVU0	A0A1B0GTG2;A0A1B0GW77;P49419;A0A1B0GTY9;A0A1B0GUA1;A0A1B0GW82;A0A1B0GTJ4;A0A1B0GV49	58.139	26.2729	17.3788	40	40	40	61.2	61.2	61.2	309.93	51	0	ALDH7A1
GPX4	Glutathione peroxidase;Phospholipid hydroperoxide glutathione peroxidase, mitochondrial	Glutathione peroxidase;Glutathione peroxidase;Phospholipid hydroperoxide glutathione peroxidase;Glutathione peroxidase (Fragment);Glutathione peroxidase;Glutathione peroxidase (Fragment);Glutathione peroxidase (Fragment);Glutathione peroxidase	A0A087X2I2;A0A087WT12;P36969;K7ERP4;K7EJ20;A0A0A0MTT1;K7EKX7;K7ENB4;R4GNE4;A0A087X247	A0A087X2I2;A0A087WT12;P36969;K7ERP4;K7EJ20;A0A0A0MTT1;K7EKX7;K7ENB4	22.024	26.2634	17.7924	18	18	18	66.3	66.3	66.3	82.042	19	0	GPX4
CCT2	T-complex protein 1 subunit beta	T-complex protein 1 subunit beta;T-complex protein 1 subunit beta;T-complex protein 1 subunit beta	P78371;F5GWF6;F8VQ14	P78371;F5GWF6;F8VQ14	57.488	26.2467	19.4318	58	58	58	93.1	93.1	93.1	323.31	75	5	CCT2
APPL2	DCC-interacting protein 13-beta	DCC-interacting protein 13-beta	Q8NEU8;F8VXB0;F8VWV2;H0YH86;F8W124;F8VS86	Q8NEU8	74.493	26.2442	19.353	47	47	46	76.8	76.8	75.8	323.31	67	3	APPL2
ANXA6	Annexin A6;Annexin	Annexin A6;Annexin	P08133;E7EMC6;E5RFF0;E5RJF5;E5RK63;E5RI05;E5RJR0;E5RIU8	P08133;E7EMC6	75.872	26.2383	18.109	56	56	16	74.6	74.6	26.7	316.28	93	3	ANXA6
ACTR3	Actin-related protein 3	Actin-related protein 3;Actin-related protein 3	P61158;B4DXW1;Q9P1U1;F8WEW2;F8WE84;F8WDR7;A0A0A0MTI9;H7C4J1;C9IZN3;Q9C0K3	P61158;B4DXW1	47.371	26.2365	18.3514	26	26	26	61.2	61.2	61.2	230.5	27	0	ACTR3
GNAI2	Guanine nucleotide-binding protein G(i) subunit alpha-2	Guanine nucleotide-binding protein G(i) subunit alpha-2	P04899;P11488;P19087;A8MTJ3;A0A087WZE5;F8WE78	P04899	40.45	26.2331	NaN	25	14	12	58	43.7	38	126.23	22	0	GNAI2
UBE2V2	Ubiquitin-conjugating enzyme E2 variant 2	Ubiquitin-conjugating enzyme E2 variant 2;Ubiquitin-conjugating enzyme E2 variant 2;Ubiquitin-conjugating enzyme E2 variant 2 (Fragment);Ubiquitin-conjugating enzyme E2 variant 2 (Fragment)	Q15819;G3V113;H0YBP9;H0YBX6	Q15819;G3V113;H0YBP9;H0YBX6	16.363	26.2306	NaN	10	10	7	57.2	57.2	46.2	27.449	9	0	UBE2V2
BOLA2	BolA-like protein 2	BolA-like protein 2;BolA-like protein 2;BolA-like protein 2 (Fragment);BOLA2-SMG1P6 readthrough (Fragment);BOLA2-SMG1P6 readthrough;BOLA2-SMG1P6 readthrough (Fragment)	Q9H3K6;A0A087WZT3;H3BV85;H3BTW0;A0A0B4J295;H3BVE0	Q9H3K6;A0A087WZT3;H3BV85;H3BTW0;A0A0B4J295;H3BVE0	10.116	26.2088	NaN	8	8	8	86	86	86	62.496	11	0	BOLA2
MAPRE1	Microtubule-associated protein RP/EB family member 1	Microtubule-associated protein RP/EB family member 1	Q15691	Q15691	29.999	26.2066	18.6799	19	19	19	78.4	78.4	78.4	228.05	30	1	MAPRE1
STX3	Syntaxin-3	Syntaxin-3 (Fragment);Syntaxin-3;Syntaxin-3;Syntaxin-3	A0A0C4DGE4;A0A286YF28;A0A0J9YW33;Q13277	A0A0C4DGE4;A0A286YF28;A0A0J9YW33;Q13277	23.243	26.2055	NaN	21	21	21	65.7	65.7	65.7	106.9	20	0	STX3
GSTO1	Glutathione S-transferase omega-1	Glutathione S-transferase omega-1	P78417	P78417	27.566	26.2044	17.5903	17	17	2	58.9	58.9	7.5	61.849	21	1	GSTO1
PGD	6-phosphogluconate dehydrogenase, decarboxylating	6-phosphogluconate dehydrogenase, decarboxylating;6-phosphogluconate dehydrogenase, decarboxylating (Fragment)	P52209;K7EPF6;K7ELN9	P52209;K7EPF6	53.139	26.2034	18.2433	29	29	12	64.6	64.6	37.1	162.1	33	1	PGD
CAPNS1	Calpain small subunit 1	Calpain small subunit 1;Calpain small subunit 1;Calpain small subunit 1;Calpain small subunit 1 (Fragment);Calpain small subunit 1 (Fragment);Calpain small subunit 1 (Fragment);Calpain small subunit 1 (Fragment);Calpain small subunit 1	A0A0C4DGQ5;P04632;K7ELJ7;A0A075B7C0;K7EM73;K7EIV0;U3KQE2;K7EKD8;U3KPR7;K7EMQ1;K7ES78	A0A0C4DGQ5;P04632;K7ELJ7;A0A075B7C0;K7EM73;K7EIV0;U3KQE2;K7EKD8	33.786	26.2008	NaN	20	20	20	70.5	70.5	70.5	153.3	16	0	CAPNS1
ATP6V1A	V-type proton ATPase catalytic subunit A	V-type proton ATPase catalytic subunit A	P38606;C9JVW8;C9JA17;F8WDJ3	P38606	68.303	26.2003	17.8025	40	40	40	76.2	76.2	76.2	323.31	51	0	ATP6V1A
ALDOC	Fructose-bisphosphate aldolase C;Fructose-bisphosphate aldolase	Fructose-bisphosphate aldolase C;Fructose-bisphosphate aldolase;Fructose-bisphosphate aldolase C (Fragment);Fructose-bisphosphate aldolase C (Fragment);Fructose-bisphosphate aldolase C (Fragment)	P09972;A8MVZ9;J3KSV6;J3QKP5;C9J8F3;K7EKH5;J3QKK1	P09972;A8MVZ9;J3KSV6;J3QKP5;C9J8F3	39.455	26.1994	17.6224	31	24	24	74.5	58.8	58.8	122.06	37	0	ALDOC
NARS	Asparagine--tRNA ligase, cytoplasmic	Asparagine--tRNA ligase, cytoplasmic	O43776;K7EMQ6;K7EJ19;K7EIU7;K7EPK2;K7EQ35	O43776	62.942	26.1932	18.6598	26	26	26	43.2	43.2	43.2	145.93	30	1	NARS
GMPR	GMP reductase 1	GMP reductase 1	P36959	P36959	37.418	26.1847	17.3124	19	19	17	64.1	64.1	58	163.19	28	0	GMPR
CCT6A	T-complex protein 1 subunit zeta	T-complex protein 1 subunit zeta	P40227;Q92526	P40227	58.024	26.1647	19.5075	33	33	33	62.3	62.3	62.3	284.19	39	4	CCT6A
CTNNBIP1	Beta-catenin-interacting protein 1	Beta-catenin-interacting protein 1	Q9NSA3	Q9NSA3	9.1703	26.1644	NaN	5	5	5	80.2	80.2	80.2	19.847	6	0	CTNNBIP1
TUBB	Tubulin beta chain	Tubulin beta chain;Tubulin beta chain;Tubulin beta chain	Q5JP53;P07437;Q5ST81;A6NNZ2;CON__ENSEMBL:ENSBTAP00000025008;Q9H4B7	Q5JP53;P07437;Q5ST81	47.766	26.1587	20.6209	38	7	6	69.2	21.4	17.8	104.52	12	4	TUBB
EIF1	Eukaryotic translation initiation factor 1	Eukaryotic translation initiation factor 1;Eukaryotic translation initiation factor 1	P41567;K7EM18	P41567;K7EM18	12.732	26.1541	NaN	7	7	5	63.7	63.7	49.6	48.898	8	0	EIF1
NIT2	Omega-amidase NIT2	Omega-amidase NIT2;Omega-amidase NIT2 (Fragment)	Q9NQR4;H7C579;F8WF70	Q9NQR4;H7C579	30.608	26.147	16.3254	28	28	28	97.5	97.5	97.5	138.64	31	0	NIT2
PSME1	Proteasome activator complex subunit 1	Proteasome activator complex subunit 1	Q06323;H0YKK6;H0YLU2	Q06323	28.723	26.1466	NaN	26	26	26	82.7	82.7	82.7	136.5	27	0	PSME1
TACC2	Transforming acidic coiled-coil-containing protein 2	Transforming acidic coiled-coil-containing protein 2;Transforming acidic coiled-coil-containing protein 2;Transforming acidic coiled-coil-containing protein 2	E9PBC6;E7EMZ9;O95359;D6RAA5;Q4VXL8;Q4VXL4;E9PGB3;A0A0U1RRM9;H0Y911;H0Y9C3;H0Y8P9;H0Y9Y7;H0Y954;H0YA73	E9PBC6;E7EMZ9;O95359	302.51	26.1379	18.3275	148	148	144	60.8	60.8	60.8	323.31	233	6	TACC2
STXBP2	Syntaxin-binding protein 2	Syntaxin-binding protein 2;Syntaxin-binding protein 2	Q15833;M0R0M7;M0R1A1;R4GMY7;M0R0D4;M0R118;M0QZ54;M0R376;A0A087WUN8	Q15833;M0R0M7	66.452	26.1288	17.0323	50	50	49	83.1	83.1	82	262.97	72	1	STXBP2
CAPZA2	F-actin-capping protein subunit alpha-2	F-actin-capping protein subunit alpha-2	P47755;F8W9N7;A0A0D9SET8;C9JUG7	P47755	32.949	26.1265	19.1737	21	14	14	79.4	66.8	66.8	121.02	19	4	CAPZA2
MT1X	Metallothionein-1X	Metallothionein-1X	P80297;U3KQD7	P80297	6.0683	26.1234	NaN	8	4	4	100	70.5	70.5	45.795	7	0	MT1X
RFFL	E3 ubiquitin-protein ligase rififylin	E3 ubiquitin-protein ligase rififylin;E3 ubiquitin-protein ligase rififylin (Fragment)	Q8WZ73;C9JE27;J3KSI3;J3KSU7;K7EN88;J3QR17;A0A087WTM5;H7BYJ1;Q969K3	Q8WZ73;C9JE27	40.514	26.1214	18.631	21	21	21	57	57	57	122.47	28	0	RFFL
PSMA7	Proteasome subunit alpha type-7	Proteasome subunit alpha type-7;Proteasome endopeptidase complex (Fragment)	O14818;H0Y586;Q8TAA3;A0A087WYS6;F5GY34	O14818;H0Y586	27.887	26.1149	22.6319	21	21	21	64.1	64.1	64.1	175.35	25	11	PSMA7
PSME2	Proteasome activator complex subunit 2	Proteasome activator complex subunit 2;Proteasome activator complex subunit 2;Proteasome activator complex subunit 2	A0A087X1Z3;Q9UL46;H0YM70;H0YKU2	A0A087X1Z3;Q9UL46;H0YM70	29.126	26.111	15.8918	15	15	15	63.8	63.8	63.8	72.417	22	0	PSME2
SARG	Specifically androgen-regulated gene protein	Specifically androgen-regulated gene protein	Q9BW04	Q9BW04	63.964	26.1067	NaN	39	39	39	74	74	74	323.31	56	0	SARG
SPINT1	Kunitz-type protease inhibitor 1	Kunitz-type protease inhibitor 1;Kunitz-type protease inhibitor 1 (Fragment);Kunitz-type protease inhibitor 1 (Fragment);Kunitz-type protease inhibitor 1 (Fragment);Kunitz-type protease inhibitor 1 (Fragment)	O43278;H3BTQ8;H3BVD9;H3BSM2;H3BR01;H3BMB6;H3BNW5	O43278;H3BTQ8;H3BVD9;H3BSM2;H3BR01	58.397	26.1031	23.2741	20	20	20	26.8	26.8	26.8	131.37	17	10	SPINT1
DCTN2	Dynactin subunit 2	Dynactin subunit 2;Dynactin subunit 2;Dynactin subunit 2 (Fragment);Dynactin subunit 2 (Fragment)	Q13561;F8W1I6;F8VW18;H0YI98;F8VX93;F8VRV7;H0YHL1;F8W0U6	Q13561;F8W1I6;F8VW18;H0YI98	44.23	26.0788	16.4009	36	36	36	71.8	71.8	71.8	211.43	48	0	DCTN2
CMBL	Carboxymethylenebutenolidase homolog	Carboxymethylenebutenolidase homolog	Q96DG6	Q96DG6	28.048	26.0695	20.2667	19	19	19	54.7	54.7	54.7	74.614	24	3	CMBL
ATOX1	Copper transport protein ATOX1	Copper transport protein ATOX1;Copper transport protein ATOX1;Copper transport protein ATOX1	O00244;E5RGN3;E5RIM7	O00244;E5RGN3;E5RIM7	7.4016	26.0648	NaN	6	6	6	98.5	98.5	98.5	17.166	6	0	ATOX1
RPS6	40S ribosomal protein S6	40S ribosomal protein S6;40S ribosomal protein S6	P62753;A2A3R5;A2A3R7	P62753;A2A3R5	28.68	26.0595	21.7174	16	16	16	59.4	59.4	59.4	105.37	20	2	RPS6
PGC	Gastricsin	Gastricsin;Gastricsin (Fragment);Gastricsin (Fragment)	P20142;A2A3L9;Q4VXA6	P20142;A2A3L9;Q4VXA6	42.425	26.0579	27.4587	10	10	10	12.1	12.1	12.1	23.971	5	11	PGC
B2M	Beta-2-microglobulin;Beta-2-microglobulin form pI 5.3	Beta-2-microglobulin	P61769	P61769	13.714	26.0524	23.9158	7	7	2	60.5	60.5	21.8	75.451	9	6	B2M
NPDC1	Neural proliferation differentiation and control protein 1	Neural proliferation differentiation and control protein 1;Neural proliferation differentiation and control protein 1	Q5SPY9;Q9NQX5	Q5SPY9;Q9NQX5	42.75	26.0501	19.3964	7	7	7	30.8	30.8	30.8	58.815	15	1	NPDC1
RPS8	40S ribosomal protein S8	40S ribosomal protein S8;40S ribosomal protein S8	P62241;Q5JR95	P62241;Q5JR95	24.205	26.045	20.9378	17	17	17	66.3	66.3	66.3	82.918	19	4	RPS8
PGM3	Phosphoacetylglucosamine mutase	Phosphoacetylglucosamine mutase;Phosphoacetylglucosamine mutase;Phosphoacetylglucosamine mutase	O95394;J3KN95;A0A087WT27;D6RIS6;H0Y987;H0Y8I3;D6RCQ8;D6RF77;D6RCD1;D6RC77	O95394;J3KN95;A0A087WT27	59.851	26.0436	17.4619	38	38	38	66.1	66.1	66.1	197.09	50	1	PGM3
CD151	Tetraspanin;CD151 antigen	Tetraspanin (Fragment);Tetraspanin (Fragment);Tetraspanin;CD151 antigen	E9PRJ3;K4DIA7;E9PMR4;P48509;K4DIB7	E9PRJ3;K4DIA7;E9PMR4;P48509	19.792	26.0426	NaN	6	6	6	16.9	16.9	16.9	10.662	8	0	CD151
VPS28	Vacuolar protein sorting-associated protein 28 homolog	Vacuolar protein sorting-associated protein 28 homolog;Vacuolar protein sorting-associated protein 28 homolog (Fragment);Vacuolar protein sorting-associated protein 28 homolog (Fragment)	Q9UK41;E9PQR7;E9PM90;E9PR04;E9PLM9	Q9UK41;E9PQR7;E9PM90	25.425	26.0367	26.1509	21	21	21	64.7	64.7	64.7	163.78	17	26	VPS28
EHD4	EH domain-containing protein 4	EH domain-containing protein 4	Q9H223	Q9H223	61.174	26.0254	15.7124	37	35	32	77.3	73.9	69.9	196.87	41	1	EHD4
PDLIM5	PDZ and LIM domain protein 5	PDZ and LIM domain protein 5;PDZ and LIM domain protein 5 (Fragment)	Q96HC4;H0Y8Y3;H0YBI4;A0A0A0MSP3;A0A0D9SFR4;H0Y929;D6RAA1;A0A0D9SFW3;D6RGG6	Q96HC4;H0Y8Y3	63.944	26.0227	17.1425	38	38	38	56.5	56.5	56.5	211.77	55	1	PDLIM5
DNPH1	2-deoxynucleoside 5-phosphate N-hydrolase 1	2-deoxynucleoside 5-phosphate N-hydrolase 1;2-deoxynucleoside 5-phosphate N-hydrolase 1 (Fragment)	O43598;H0Y8X4	O43598;H0Y8X4	19.108	26.0225	NaN	9	9	9	42.5	42.5	42.5	53.81	10	0	DNPH1
BAIAP2	Brain-specific angiogenesis inhibitor 1-associated protein 2	Brain-specific angiogenesis inhibitor 1-associated protein 2	Q9UQB8;I3L3C6;I3L3C5	Q9UQB8	60.867	26.022	22.1559	48	48	2	83	83	4.9	223.02	59	13	BAIAP2
ACLY	ATP-citrate synthase	ATP-citrate synthase	P53396;K7ESG8;K7EIE7	P53396	120.84	26.0205	19.1157	71	71	71	72.1	72.1	72.1	323.31	72	5	ACLY
MT2A	Metallothionein-2	Metallothionein-2	P02795;H3BSP9	P02795	6.0422	26.0142	NaN	9	5	5	100	70.5	70.5	28.822	10	0	MT2A
DDAH2	N(G),N(G)-dimethylarginine dimethylaminohydrolase 2	N(G),N(G)-dimethylarginine dimethylaminohydrolase 2;N(G),N(G)-dimethylarginine dimethylaminohydrolase 2 (Fragment);N(G),N(G)-dimethylarginine dimethylaminohydrolase 2 (Fragment);N(G),N(G)-dimethylarginine dimethylaminohydrolase 2 (Fragment);N(G),N(G)-dimet	O95865;A0A140T971;Q5SSV3;Q5SRR8;H0Y7N1	O95865;A0A140T971;Q5SSV3;Q5SRR8;H0Y7N1	29.644	25.9916	17.2446	19	18	18	75.8	75.8	75.8	124.43	22	0	DDAH2
PSMA5	Proteasome subunit alpha type-5	Proteasome subunit alpha type-5	P28066	P28066	26.411	25.9898	22.1774	15	15	15	64.3	64.3	64.3	128.72	17	2	PSMA5
AZGP1	Zinc-alpha-2-glycoprotein	Zinc-alpha-2-glycoprotein;Zinc-alpha-2-glycoprotein	P25311;C9JEV0;H7BZJ8	P25311;C9JEV0	34.258	25.9865	21.0909	16	16	16	49.7	49.7	49.7	237.12	27	4	AZGP1
UFM1	Ubiquitin-fold modifier 1	Ubiquitin-fold modifier 1;Ubiquitin-fold modifier 1 (Fragment)	P61960;H0Y614	P61960;H0Y614	9.1175	25.9838	NaN	6	6	6	80	80	80	53.539	6	0	UFM1
GNG5	Guanine nucleotide-binding protein G(I)/G(S)/G(O) subunit gamma-5	Guanine nucleotide-binding protein G(I)/G(S)/G(O) subunit gamma-5	P63218	P63218	7.3184	25.9721	19.8421	7	7	7	91.2	91.2	91.2	16.939	5	1	GNG5
PPP2R1A	Serine/threonine-protein phosphatase 2A 65 kDa regulatory subunit A alpha isoform	Serine/threonine-protein phosphatase 2A 65 kDa regulatory subunit A alpha isoform;cDNA FLJ33169 fis, clone ADRGL2000384, highly similar to Serine/threonine-protein phosphatase 2A 65 kDa regulatory subunit A alpha isoform;Serine/threonine-protein phosphatas	P30153;B3KQV6;C9J9C1;E9PH38;E9PPI5;E9PNM7;E9PHZ6	P30153;B3KQV6;C9J9C1	65.308	25.9717	17.8642	35	35	29	55.7	55.7	43.1	179.04	39	2	PPP2R1A
CRIP2	Cysteine-rich protein 2	Cysteine-rich protein 2;Cysteine-rich protein 2 (Fragment);Cysteine-rich protein 2 (Fragment)	P52943;H0YFA4;H0YHD8	P52943;H0YFA4;H0YHD8	22.492	25.9708	18.2513	10	10	10	80.8	80.8	80.8	74.801	18	2	CRIP2
TC2N	Tandem C2 domains nuclear protein	Tandem C2 domains nuclear protein	Q8N9U0;H0YJ73	Q8N9U0	55.284	25.966	18.8765	36	36	36	69	69	69	181.46	40	0	TC2N
UBE2V1	Ubiquitin-conjugating enzyme E2 variant 1	Ubiquitin-conjugating enzyme E2 variant 1;Ubiquitin-conjugating enzyme E2 variant 1;HCG2044781;Ubiquitin-conjugating enzyme E2 variant 1	Q13404;G3V2F7;I3L0A0;A0A0A0MSL3;E5RIF1;D6RG00	Q13404;G3V2F7;I3L0A0;A0A0A0MSL3	16.495	25.965	NaN	9	6	6	53.7	36.1	36.1	15.709	7	0	UBE2V1
OTUB1	Ubiquitin thioesterase OTUB1	Ubiquitin thioesterase;Ubiquitin thioesterase OTUB1;Ubiquitin thioesterase OTUB1;Ubiquitin thioesterase OTUB1;Ubiquitin thioesterase;Ubiquitin thioesterase OTUB1	J3KR44;Q96FW1;F5GYN4;F5GYJ8;F5H6Q1;F5H3F0	J3KR44;Q96FW1;F5GYN4;F5GYJ8;F5H6Q1;F5H3F0	31.44	25.9596	20.8463	14	14	14	55.9	55.9	55.9	77.286	15	2	OTUB1
GNG10	Guanine nucleotide-binding protein G(I)/G(S)/G(O) subunit gamma-10	Guanine nucleotide-binding protein G(I)/G(S)/G(O) subunit gamma-10	P50151;A0A024R161	P50151	7.2053	25.956	18.366	5	5	5	91.2	91.2	91.2	22.579	5	0	GNG10
ACTN4	Alpha-actinin-4	Alpha-actinin-4;Alpha-actinin-4	O43707;F5GXS2;H7C144;K7EP19;M0QZQ3;C9JY79;Q9H254	O43707;F5GXS2	104.85	25.9538	NaN	71	71	38	70.5	70.5	42.3	323.31	80	0	ACTN4
FKBP4	Peptidyl-prolyl cis-trans isomerase FKBP4;Peptidyl-prolyl cis-trans isomerase FKBP4, N-terminally processed	Peptidyl-prolyl cis-trans isomerase FKBP4	Q02790;H0YFG2;F5H1U3;F5H120	Q02790	51.804	25.9538	19.7327	44	44	44	80	80	80	254.52	54	4	FKBP4
ANXA7	Annexin A7	Annexin A7	P20073	P20073	52.739	25.9379	20.3221	23	22	22	41	41	41	91.364	30	1	ANXA7
UBE2N	Ubiquitin-conjugating enzyme E2 N	Ubiquitin-conjugating enzyme E2 N;Ubiquitin-conjugating enzyme E2 N;Ubiquitin-conjugating enzyme E2 N;Ubiquitin-conjugating enzyme E2 N	P61088;F8VSD4;F8VV71;F8VQQ8;F8VZ29;Q5JXB2	P61088;F8VSD4;F8VV71;F8VQQ8	17.138	25.9285	17.0702	11	11	11	71.1	71.1	71.1	32.379	13	0	UBE2N
RHOG	Rho-related GTP-binding protein RhoG	Rho-related GTP-binding protein RhoG	P84095	P84095	21.308	25.9215	20.3335	14	13	13	71.7	66	66	49.292	16	2	RHOG
CCT5	T-complex protein 1 subunit epsilon	T-complex protein 1 subunit epsilon;T-complex protein 1 subunit epsilon;T-complex protein 1 subunit epsilon;T-complex protein 1 subunit epsilon	P48643;E7ENZ3;B7ZAR1;E9PCA1;D6RIZ7;H0Y914	P48643;E7ENZ3;B7ZAR1;E9PCA1	59.67	25.9213	19.2012	45	45	45	82.4	82.4	82.4	279.16	56	2	CCT5
SH3BGRL	SH3 domain-binding glutamic acid-rich-like protein	SH3 domain-binding glutamic acid-rich-like protein	O75368	O75368	12.774	25.9166	NaN	10	10	10	91.2	91.2	91.2	33.156	11	0	SH3BGRL
NEFH	Neurofilament heavy polypeptide	Neurofilament heavy polypeptide	P12036;H0YIC5;P07196	P12036	112.48	25.9038	19.8678	52	52	48	55.7	55.7	54.5	276.95	48	3	NEFH
ACP1	Low molecular weight phosphotyrosine protein phosphatase	Low molecular weight phosphotyrosine protein phosphatase;Acid phosphatase 1, soluble, isoform CRA_d	P24666;G5E9R5;F2Z2Q9	P24666;G5E9R5	18.042	25.8984	NaN	14	14	12	83.5	83.5	70.3	112.95	16	0	ACP1
LPP	Lipoma-preferred partner	Lipoma-preferred partner;Lipoma-preferred partner;LIM domain containing preferred translocation partner in lipoma, isoform CRA_e	Q93052;A0A087WZF1;C9JUT4;C9JXK9;C9J4E3;C9JIY7;C9JT42;C9J3U9;C9J1K7;C9J5C8;C9JE51;C9J2R5	Q93052;A0A087WZF1;C9JUT4	65.746	25.8962	18.8119	31	31	31	61.9	61.9	61.9	152.88	39	1	LPP
PSMA6	Proteasome subunit alpha type;Proteasome subunit alpha type-6	Proteasome subunit alpha type;Proteasome subunit alpha type-6;Proteasome subunit alpha type;Proteasome subunit alpha type	G3V5Z7;P60900;G3V295;G3V3I1;G3V3U4;G3V4S5;G3V2S7;H0YJC4	G3V5Z7;P60900;G3V295;G3V3I1	28.147	25.8949	21.2849	22	22	22	61.9	61.9	61.9	154.64	25	5	PSMA6
RPS20	40S ribosomal protein S20	40S ribosomal protein S20;40S ribosomal protein S20;40S ribosomal protein S20	P60866;E5RJX2;G3XAN0;E5RIP1	P60866;E5RJX2;G3XAN0	13.373	25.8796	NaN	4	4	4	45.4	45.4	45.4	13.419	7	0	RPS20
VTA1	Vacuolar protein sorting-associated protein VTA1 homolog	Chromosome 6 open reading frame 55, isoform CRA_b;Vacuolar protein sorting-associated protein VTA1 homolog	A0A087WY55;Q9NP79;Q5TGM0	A0A087WY55;Q9NP79	31.102	25.8796	18.8937	17	17	17	58.2	58.2	58.2	116.42	16	1	VTA1
USP5	Ubiquitin carboxyl-terminal hydrolase 5	Ubiquitin carboxyl-terminal hydrolase 5	P45974;F5H571	P45974	95.785	25.8613	19.141	51	51	49	62.1	62.1	61	207.48	48	4	USP5
SH3BGRL2	SH3 domain-binding glutamic acid-rich-like protein 2	SH3 domain-binding glutamic acid-rich-like protein 2	Q9UJC5	Q9UJC5	12.326	25.861	NaN	5	5	5	50.5	50.5	50.5	32.803	6	0	SH3BGRL2
TCEB1	Transcription elongation factor B polypeptide 1	Elongin-C (Fragment);Elongin-C;Elongin-C	E5RHG8;Q15369;R4GMY8	E5RHG8;Q15369;R4GMY8	9.9601	25.8558	NaN	11	11	11	89.9	89.9	89.9	48.338	17	0	TCEB1
CHMP1A	Charged multivesicular body protein 1a	Charged multivesicular body protein 1a;Charged multivesicular body protein 1a;Charged multivesicular body protein 1a	Q9HD42;F8VUA2;F8VVT7	Q9HD42;F8VUA2;F8VVT7	21.703	25.8493	18.5877	12	12	6	42.9	42.9	19.9	32.047	12	1	CHMP1A
AARS	Alanine--tRNA ligase, cytoplasmic	Alanine--tRNA ligase, cytoplasmic	P49588;H3BPK7	P49588	106.81	25.8409	18.1724	68	68	68	72	72	72	323.31	85	0	AARS
LGALS1	Galectin-1	Galectin-1	P09382;F8WEI7	P09382	14.716	25.8246	18.8897	6	6	6	54.1	54.1	54.1	29.937	7	1	LGALS1
SCRN1	Secernin-1	Secernin-1;Secernin-1 (Fragment)	Q12765;C9K052;B8ZZP4;C9J7U9	Q12765;C9K052	46.382	25.8191	20.0939	14	14	14	37	37	37	52.355	21	2	SCRN1
PURA	Transcriptional activator protein Pur-alpha	Transcriptional activator protein Pur-alpha	Q00577	Q00577	34.91	25.8184	NaN	17	17	14	47.5	47.5	41.3	67.026	19	0	PURA
NAMPT	Nicotinamide phosphoribosyltransferase	Nicotinamide phosphoribosyltransferase;Nicotinamide phosphoribosyltransferase	P43490;A0A0C4DFS8;C9JG65;C9JF35	P43490;A0A0C4DFS8	55.52	25.8164	18.11	35	35	35	61.5	61.5	61.5	323.31	34	2	NAMPT
CLTA	Clathrin light chain A	Clathrin light chain A;Clathrin light chain;Clathrin light chain	P09496;F8WF69;C9J8P9	P09496;F8WF69;C9J8P9	27.076	25.8157	NaN	9	9	9	21	21	21	34.438	12	0	CLTA
RNPEP	Aminopeptidase B	Aminopeptidase B;Aminopeptidase B	A6NKB8;Q9H4A4;A0A087WU27;A0A087WUS4;C9JMZ3	A6NKB8;Q9H4A4	68.168	25.8134	19.3964	40	40	40	65.1	65.1	65.1	203.92	38	3	RNPEP
NUTF2	Nuclear transport factor 2	Nuclear transport factor 2;Nuclear transport factor 2 (Fragment)	P61970;H3BRV9	P61970;H3BRV9	14.478	25.8095	20.4467	5	5	5	55.9	55.9	55.9	63.754	7	1	NUTF2
SLAIN2	SLAIN motif-containing protein 2	SLAIN motif-containing protein 2	Q9P270;D6REM5	Q9P270	62.543	25.7999	17.0788	33	33	17	59.9	59.9	27.4	141.29	45	1	SLAIN2
UBXN6	UBX domain-containing protein 6	UBX domain-containing protein 6;UBX domain-containing protein 6 (Fragment)	Q9BZV1;K7EP32;K7ELN1;K7EJ02	Q9BZV1;K7EP32	49.753	25.7909	18.5443	27	27	27	70.5	70.5	70.5	121.4	30	1	UBXN6
TOM1L1	TOM1-like protein 1	TOM1-like protein 1;TOM1-like protein 1;TOM1-like protein 1;TOM1-like protein 1;TOM1-like protein 1 (Fragment)	J3KQU4;I3L4I4;O75674;I3NI44;I3L1G1;I3L367;I3L3T4;I3L4G0;I3L3M3;I3L0N2;I3L1Q1;I3L4N3	J3KQU4;I3L4I4;O75674;I3NI44;I3L1G1	51.686	25.7701	21.6987	17	17	17	51.6	51.6	51.6	109.36	19	9	TOM1L1
TXNL1	Thioredoxin-like protein 1	Thioredoxin-like protein 1;Thioredoxin-like protein 1 (Fragment)	O43396;K7ER96;K7EML9;K7EME7;K7EKG2;K7EPB7	O43396;K7ER96	32.251	25.761	18.7687	13	13	13	59.9	59.9	59.9	127.9	15	1	TXNL1
RPL35	60S ribosomal protein L35	60S ribosomal protein L35;60S ribosomal protein L35	P42766;F2Z388	P42766;F2Z388	14.551	25.7554	18.2107	9	9	9	43.9	43.9	43.9	33.846	8	0	RPL35
CHMP2A	Charged multivesicular body protein 2a	Charged multivesicular body protein 2a;Charged multivesicular body protein 2a (Fragment);Charged multivesicular body protein 2a (Fragment)	O43633;M0R1L7;M0R1T5;M0QXX8	O43633;M0R1L7;M0R1T5	25.104	25.7535	NaN	15	15	15	47.7	47.7	47.7	28.116	13	0	CHMP2A
LDHA	L-lactate dehydrogenase A chain	L-lactate dehydrogenase A chain	P00338;F5GXY2;F5GYU2;F5GXH2;F5H8H6;F5GXC7;F5GWW2;F5GXU1;F5GZQ4;F5H5J4;F5H6W8;A0A087WUM2;Q6ZMR3	P00338	36.688	25.7428	18.9274	22	22	21	62	62	62	107.17	15	1	LDHA
PSMA2	Proteasome subunit alpha type;Proteasome subunit alpha type-2	Proteasome subunit alpha type;Proteasome subunit alpha type-2	A0A024RA52;P25787;C9JCK5;H3BT36;H7C402	A0A024RA52;P25787	25.898	25.7326	19.8351	17	17	17	70.5	70.5	70.5	119.15	20	1	PSMA2
DOPEY2	Protein dopey-2	Protein dopey-2	Q9Y3R5;F8W8U9	Q9Y3R5	258.23	25.7324	19.9857	107	107	106	48.2	48.2	47.8	323.31	137	14	DOPEY2
CRYAB	Alpha-crystallin B chain	Alpha-crystallin B chain;Alpha-crystallin B chain (Fragment);Alpha-crystallin B chain;Alpha-crystallin B chain (Fragment);Alpha-crystallin B chain (Fragment);Alpha-crystallin B chain	P02511;E9PR44;A0A024R3B9;E9PJL7;E9PNH7;E9PRA8;H0YCW8;E9PS12;E9PRS4	P02511;E9PR44;A0A024R3B9;E9PJL7;E9PNH7;E9PRA8	20.159	25.7323	17.8866	14	14	14	73.7	73.7	73.7	79.306	19	0	CRYAB
PIN1	Peptidyl-prolyl cis-trans isomerase NIMA-interacting 1	Peptidyl-prolyl cis-trans isomerase NIMA-interacting 1;Peptidyl-prolyl cis-trans isomerase (Fragment);Peptidyl-prolyl cis-trans isomerase	Q13526;K7EN45;K7EMU7;O15428	Q13526;K7EN45;K7EMU7	18.243	25.7311	19.3451	8	8	8	58.9	58.9	58.9	145.4	13	0	PIN1
PEA15	Astrocytic phosphoprotein PEA-15	Astrocytic phosphoprotein PEA-15;Astrocytic phosphoprotein PEA-15	Q15121;B1AKZ5	Q15121;B1AKZ5	15.04	25.7223	NaN	10	10	10	90.8	90.8	90.8	83.07	16	0	PEA15
CHMP2B	Charged multivesicular body protein 2b	Charged multivesicular body protein 2b;Charged multivesicular body protein 2b (Fragment);Charged multivesicular body protein 2b	Q9UQN3;A0A087WW88;C9J0A7;Q92828	Q9UQN3;A0A087WW88;C9J0A7	23.906	25.7199	20.0272	18	18	18	54.5	54.5	54.5	69.555	22	1	CHMP2B
RAN	GTP-binding nuclear protein Ran	GTP-binding nuclear protein Ran;GTP-binding nuclear protein Ran;GTP-binding nuclear protein Ran (Fragment);GTP-binding nuclear protein Ran (Fragment)	B5MDF5;P62826;J3KQE5;F5H018;H0YFC6;A0A087X0W0	B5MDF5;P62826;J3KQE5;F5H018	26.224	25.7061	19.6052	17	17	8	56.2	56.2	30	63.672	13	0	RAN
VASP	Vasodilator-stimulated phosphoprotein	Vasodilator-stimulated phosphoprotein	P50552;K7EM16;K7ENL7;K7ENR7;K7EQD0;K7EIG8	P50552	39.829	25.7033	17.8314	20	20	20	53.2	53.2	53.2	102.85	28	0	VASP
TUBA4A	Tubulin alpha-4A chain	Tubulin alpha-4A chain	P68366;C9JEV8;C9JQ00;C9JJQ8;C9JDL2	P68366	49.924	25.7027	19.8019	43	15	15	83.9	39.1	39.1	153.08	22	3	TUBA4A
PPP2CA	Serine/threonine-protein phosphatase 2A catalytic subunit alpha isoform	Serine/threonine-protein phosphatase 2A catalytic subunit alpha isoform	P67775	P67775	35.594	25.7018	NaN	23	23	0	58.3	58.3	0	198.68	32	0	PPP2CA
CARHSP1	Calcium-regulated heat stable protein 1	Calcium-regulated heat-stable protein 1;Calcium-regulated heat-stable protein 1 (Fragment);Calcium-regulated heat-stable protein 1 (Fragment);Calcium-regulated heat-stable protein 1 (Fragment);Calcium-regulated heat-stable protein 1 (Fragment);Calcium-regu	Q9Y2V2;H3BSW7;H3BUY4;H3BPY5;H3BNU9;H3BTK3;I3L3X8	Q9Y2V2;H3BSW7;H3BUY4;H3BPY5;H3BNU9;H3BTK3;I3L3X8	15.892	25.6807	17.3316	8	8	8	81	81	81	38.569	13	0	CARHSP1
RPS12	40S ribosomal protein S12	40S ribosomal protein S12	P25398	P25398	14.515	25.6777	NaN	9	9	9	76.5	76.5	76.5	55.773	13	0	RPS12
SRI	Sorcin	Sorcin;Sorcin;cDNA FLJ54267, moderately similar to Sorcin	C9J0K6;P30626;B4DHQ6	C9J0K6;P30626;B4DHQ6	17.605	25.6746	19.5014	10	10	10	72.3	72.3	72.3	154.51	14	1	SRI
ATIC	Bifunctional purine biosynthesis protein PURH;Phosphoribosylaminoimidazolecarboxamide formyltransferase;IMP cyclohydrolase	Bifunctional purine biosynthesis protein PURH	P31939;H7C1S2;C9JLK0;F8WEF0	P31939	64.615	25.6725	NaN	46	46	46	88.5	88.5	88.5	323.31	50	0	ATIC
RAB18	Ras-related protein Rab-18	Ras-related protein Rab-18;Ras-related protein Rab-18;Ras-related protein Rab-18;Ras-related protein Rab-18 (Fragment)	Q9NP72;A0A087X163;Q5W0J0;H0Y6T8	Q9NP72;A0A087X163;Q5W0J0;H0Y6T8	22.977	25.6716	18.6402	17	17	17	74.3	74.3	74.3	58.508	12	2	RAB18
RAB21	Ras-related protein Rab-21	Ras-related protein Rab-21	Q9UL25	Q9UL25	24.347	25.669	NaN	14	14	14	62.7	62.7	62.7	65.504	11	0	RAB21
CTTN	Src substrate cortactin	Src substrate cortactin	Q14247;H0YCD9;H0YEV2	Q14247	61.585	25.658	15.3858	48	48	48	72.4	72.4	72.4	279.76	67	0	CTTN
GNAS	Guanine nucleotide-binding protein G(s) subunit alpha isoforms short;Guanine nucleotide-binding protein G(s) subunit alpha isoforms XLas	Guanine nucleotide-binding protein G(s) subunit alpha isoforms short;Guanine nucleotide-binding protein G(s) subunit alpha isoforms XLas;Guanine nucleotide-binding protein G(s) subunit alpha isoforms short	P63092;Q5JWF2;A0A0A0MR13;P38405;Q5JWD1;S4R3E3;Q5JWE9;H0Y7F4;A2A2R6;H0Y7E8;S4R3V9	P63092;Q5JWF2;A0A0A0MR13	45.664	25.6549	20.2571	20	18	18	45.9	45.9	45.9	72.04	22	0	GNAS
ACTB		Actin, cytoplasmic 1 (Fragment)	A0A2R8YEA7	A0A2R8YEA7	17.471	25.6544	23.7558	18	2	2	84.1	15.9	15.9	20.022	6	3	ACTB
NPNT	Nephronectin	Nephronectin;Nephronectin (Fragment)	Q6UXI9;H0YAK9	Q6UXI9;H0YAK9	61.906	25.654	23.2935	22	22	3	37.5	37.5	5.3	121.5	23	19	NPNT
GMPPB	Mannose-1-phosphate guanyltransferase beta	Mannose-1-phosphate guanyltransferase beta	Q9Y5P6	Q9Y5P6	39.834	25.6479	20.7631	18	18	18	50.8	50.8	50.8	104.9	22	1	GMPPB
HN1L	Hematological and neurological expressed 1-like protein	Jupiter microtubule-associated homolog 2;Jupiter microtubule associated homolog 2;Jupiter microtubule-associated homolog 2 (Fragment);Jupiter microtubule-associated homolog 2 (Fragment);Jupiter microtubule-associated homolog 2 (Fragment);Jupiter microtubul	A6NGP5;Q9H910;H3BU16;H3BMV3;H3BMT0;H3BTV5;H3BMM8;B4E1P3	A6NGP5;Q9H910;H3BU16;H3BMV3;H3BMT0;H3BTV5	18.906	25.6406	15.971	13	13	13	85.4	85.4	85.4	33.182	16	0	HN1L
XPNPEP1	Xaa-Pro aminopeptidase 1	Xaa-Pro aminopeptidase 1;Xaa-Pro aminopeptidase 1	Q9NQW7;Q5T6H7;Q5T6H2;Q5T6H3	Q9NQW7;Q5T6H7	69.917	25.6282	14.7767	36	36	35	70.9	70.9	70.9	225.6	36	0	XPNPEP1
MTAP	S-methyl-5-thioadenosine phosphorylase;Purine nucleoside phosphorylase	S-methyl-5-thioadenosine phosphorylase;S-methyl-5-thioadenosine phosphorylase;Purine nucleoside phosphorylase	Q13126;B4DUC8;J3QSB7;F2Z2F3;F8WES2;J3KRN1	Q13126;B4DUC8;J3QSB7	31.236	25.6276	17.1096	19	19	19	76.3	76.3	76.3	102.2	23	0	MTAP
RPS14	40S ribosomal protein S14	40S ribosomal protein S14 (Fragment);40S ribosomal protein S14;40S ribosomal protein S14	A0A2R8Y811;P62263;E5RH77	A0A2R8Y811;P62263;E5RH77	16.159	25.6083	20.0196	8	8	8	66.7	66.7	66.7	21.803	9	1	RPS14
SPINK2	Serine protease inhibitor Kazal-type 2	Serine protease inhibitor Kazal-type 2;Serine protease inhibitor Kazal-type 2;Serine protease inhibitor Kazal-type 2	D6RC51;D6RI10;P20155	D6RC51;D6RI10;P20155	12.455	25.6082	26.1501	10	10	10	81.5	81.5	81.5	65.152	5	11	SPINK2
FAM129B	Niban-like protein 1	Niban-like protein 1	Q96TA1	Q96TA1	84.137	25.6	18.8332	41	41	41	66.1	66.1	66.1	323.31	39	2	FAM129B
LYPLA1	Acyl-protein thioesterase 1	Acyl-protein thioesterase 1;Acyl-protein thioesterase 1 (Fragment);Acyl-protein thioesterase 1	O75608;E5RGR0;B4DP64	O75608;E5RGR0;B4DP64	24.669	25.5934	18.1424	11	11	2	66.5	66.5	11.7	127.24	12	1	LYPLA1
ABI1	Abl interactor 1	Abl interactor 1;Abl interactor 1;Abl interactor 1	A0A0A0MRT6;Q8IZP0;B6VEX4	A0A0A0MRT6;Q8IZP0;B6VEX4	51.769	25.5835	16.9144	23	23	19	50.9	50.9	44	165.56	29	1	ABI1
HNMT	Histamine N-methyltransferase	Histamine N-methyltransferase	P50135	P50135	33.295	25.5808	NaN	15	15	15	46.6	46.6	46.6	76.715	20	0	HNMT
ARPC4	Actin-related protein 2/3 complex subunit 4	Actin-related protein 2/3 complex subunit 4;Actin-related protein 2/3 complex subunit 4;ARPC4-TTLL3 readthrough (Fragment)	P59998;F8WCF6;H7C0A3;R4GN08	P59998;F8WCF6;H7C0A3	19.667	25.5707	18.7547	10	10	3	63.1	63.1	19.6	39.207	13	1	ARPC4
ENOPH1	Enolase-phosphatase E1	Enolase-phosphatase E1;Enolase-phosphatase E1;Enolase-phosphatase E1	A0A0C4DGY8;D6RA00;Q9UHY7	A0A0C4DGY8;D6RA00;Q9UHY7	16.533	25.5661	17.2528	13	13	13	64.4	64.4	64.4	59.962	16	0	ENOPH1
MPI	Mannose-6-phosphate isomerase	Mannose-6-phosphate isomerase;Mannose-6-phosphate isomerase;Mannose-6-phosphate isomerase;Mannose-6-phosphate isomerase;Mannose-6-phosphate isomerase;Mannose-6-phosphate isomerase (Fragment);Mannose-6-phosphate isomerase;Mannose-6-phosphate isomerase	P34949;H3BPB8;F5GX71;H3BMZ9;H3BPP3;H3BP57;H3BUZ9;H3BT48;H3BPM5;H3BQX0;H3BPU7;H3BU66;H3BNY8;H3BT46;H3BUG1;H3BN01;B4DYB8	P34949;H3BPB8;F5GX71;H3BMZ9;H3BPP3;H3BP57;H3BUZ9;H3BT48	46.655	25.5524	NaN	20	20	20	62.4	62.4	62.4	133.1	18	0	MPI
NAP1L4	Nucleosome assembly protein 1-like 4	Nucleosome assembly protein 1-like 4;Nucleosome assembly protein 1-like 4 (Fragment);Nucleosome assembly protein 1-like 4 (Fragment);Nucleosome assembly protein 1-like 4 (Fragment);Nucleosome assembly protein 1-like 4 (Fragment);Nucleosome assembly protein	Q99733;C9JZI7;C9J6D1;E9PKT8;E9PNJ7;A8MXH2;E9PNW0;E9PJJ2;E9PS34;E9PKI2;E9PP22;C9J1B1;H0YCI4	Q99733;C9JZI7;C9J6D1;E9PKT8;E9PNJ7;A8MXH2;E9PNW0;E9PJJ2;E9PS34	42.823	25.5519	NaN	23	23	21	58.1	58.1	55.2	293.67	26	0	NAP1L4
MPST	3-mercaptopyruvate sulfurtransferase;Sulfurtransferase	3-mercaptopyruvate sulfurtransferase;3-mercaptopyruvate sulfurtransferase	P25325;B1AH49	P25325;B1AH49	33.178	25.5504	16.0436	18	18	18	65	65	65	90.125	16	0	MPST
GSTZ1	Maleylacetoacetate isomerase	Glutathione transferase zeta 1 (Maleylacetoacetate isomerase), isoform CRA_c;Maleylacetoacetate isomerase;Maleylacetoacetate isomerase;Maleylacetoacetate isomerase;Maleylacetoacetate isomerase;Maleylacetoacetate isomerase	A0A0C4DFM0;G3V5T0;G3V4T6;O43708;G3V267;A0A0A0MR33;G3V3B9;G3V5U6;G3V5G8;H0YJN8	A0A0C4DFM0;G3V5T0;G3V4T6;O43708;G3V267;A0A0A0MR33	24.114	25.5502	NaN	8	8	8	56.5	56.5	56.5	104.62	14	0	GSTZ1
CDC37	Hsp90 co-chaperone Cdc37;Hsp90 co-chaperone Cdc37, N-terminally processed	Hsp90 co-chaperone Cdc37;Hsp90 co-chaperone Cdc37 (Fragment);Hsp90 co-chaperone Cdc37 (Fragment)	Q16543;K7EQA9;K7EKQ2;K7EL68;K7EIU0;K7EJ06	Q16543;K7EQA9;K7EKQ2	44.468	25.5498	NaN	16	16	16	50.5	50.5	50.5	67.12	22	0	CDC37
SKP1	S-phase kinase-associated protein 1	S-phase kinase-associated protein 1;S-phase kinase-associated protein 1;S-phase kinase-associated protein 1 (Fragment);S-phase kinase-associated protein 1 (Fragment)	E5RJR5;P63208;E7ERH2;F8W8N3;E5RGM3	E5RJR5;P63208;E7ERH2;F8W8N3	18.72	25.5123	NaN	9	9	8	71.2	71.2	53.4	69.752	14	0	SKP1
TSTA3	GDP-L-fucose synthase	GDP-L-fucose synthase;GDP-L-fucose synthase (Fragment);GDP-L-fucose synthase (Fragment);GDP-L-fucose synthase (Fragment);GDP-L-fucose synthase (Fragment)	Q13630;E9PKL9;E9PP14;A0A0J9YX13;E9PLH9;H0YE90;H0YCP7;E9PP60	Q13630;E9PKL9;E9PP14;A0A0J9YX13;E9PLH9	35.892	25.512	NaN	18	18	18	57.9	57.9	57.9	104.29	21	0	TSTA3
ABRACL	Costars family protein ABRACL	Costars family protein ABRACL	Q9P1F3;Q5SZC9	Q9P1F3	9.0564	25.5095	19.014	4	4	4	63	63	63	19.16	4	0	ABRACL
CACNA2D1	Voltage-dependent calcium channel subunit alpha-2/delta-1;Voltage-dependent calcium channel subunit alpha-2-1;Voltage-dependent calcium channel subunit delta-1	Voltage-dependent calcium channel subunit alpha-2/delta-1	P54289;H0Y715;E7ERK3	P54289	124.57	25.5024	20.8332	45	45	45	45.2	45.2	45.2	323.31	47	10	CACNA2D1
PRKACB	cAMP-dependent protein kinase catalytic subunit beta	cAMP-dependent protein kinase catalytic subunit beta;cAMP-dependent protein kinase catalytic subunit beta;cAMP-dependent protein kinase catalytic subunit beta;cAMP-dependent protein kinase catalytic subunit beta (Fragment);cAMP-dependent protein kinase cat	P22694;A0A0A0MS54;A0A087WVC4;B1APG2;B1APF8;B1APF9;B1APG3;B1APG1;B1APG0;B1APF7	P22694;A0A0A0MS54;A0A087WVC4;B1APG2;B1APF8;B1APF9;B1APG3;B1APG1;B1APG0;B1APF7	40.622	25.5018	17.6006	24	24	11	56.4	56.4	27.9	81.462	20	0	PRKACB
RAD23B	UV excision repair protein RAD23 homolog B	UV excision repair protein RAD23 homolog B;UV excision repair protein RAD23 homolog B (Fragment)	P54727;Q5W0S5;Q5W0S4;H0Y579	P54727;Q5W0S5	43.171	25.4963	NaN	14	14	12	30.8	30.8	30.8	85.548	20	0	RAD23B
PFDN2	Prefoldin subunit 2	Prefoldin subunit 2	Q9UHV9	Q9UHV9	16.648	25.4693	NaN	8	8	8	76	76	76	41.052	13	0	PFDN2
RPL7	60S ribosomal protein L7	60S ribosomal protein L7;60S ribosomal protein L7	P18124;A8MUD9	P18124;A8MUD9	29.225	25.4655	18.7407	8	8	8	31.5	31.5	31.5	19.997	3	0	RPL7
CIB1	Calcium and integrin-binding protein 1	Calcium and integrin-binding protein 1	Q99828;A0A3B3ISY8	Q99828	21.703	25.459	18.2544	15	15	15	73.8	73.8	73.8	60.459	13	1	CIB1
RPS11	40S ribosomal protein S11	40S ribosomal protein S11;40S ribosomal protein S11	P62280;M0QZC5;M0R1H5;M0R1H6	P62280;M0QZC5	18.431	25.4528	18.1408	15	15	15	72.2	72.2	72.2	45.53	13	0	RPS11
SEMA3C	Semaphorin-3C	Semaphorin-3C	Q99985;Q14563	Q99985	85.206	25.449	23.7646	35	35	33	46.2	46.2	44.5	165.74	21	23	SEMA3C
BAIAP2L1	Brain-specific angiogenesis inhibitor 1-associated protein 2-like protein 1	Brain-specific angiogenesis inhibitor 1-associated protein 2-like protein 1	Q9UHR4	Q9UHR4	56.882	25.4401	19.7937	37	37	37	75.1	75.1	75.1	182.72	42	2	BAIAP2L1
LCP1	Plastin-2	Plastin-2	P13796;Q5TBN3;Q5TBN5	P13796	70.288	25.4391	NaN	41	41	36	62.4	62.4	60.4	270.31	39	0	LCP1
DBNL	Drebrin-like protein	Drebrin-like protein;Drebrin-like protein (Fragment)	Q9UJU6;H0Y5J4;F8WBG8	Q9UJU6;H0Y5J4	48.207	25.436	21.249	25	25	8	57	57	15.3	135.96	27	1	DBNL
RPS26	40S ribosomal protein S26;Putative 40S ribosomal protein S26-like 1	40S ribosomal protein S26;Putative 40S ribosomal protein S26-like 1	P62854;Q5JNZ5	P62854;Q5JNZ5	13.015	25.4338	20.6007	6	6	6	39.1	39.1	39.1	20.125	4	0	RPS26
GMFB	Glia maturation factor beta	Glia maturation factor beta;Glia maturation factor beta (Fragment)	P60983;G3V4P8;G3V3X4;M0QYG8;M0R1D2;M0R0C1;M0QYJ8;O60234	P60983;G3V4P8	16.713	25.4227	15.9055	12	12	12	90.1	90.1	90.1	55.873	14	0	GMFB
SDCBP	Syntenin-1	Syntenin-1;cDNA FLJ55055, moderately similar to Syntenin-1;Syntenin-1	O00560;B4DHN5;E9PBU7	O00560;B4DHN5;E9PBU7	32.444	25.4132	26.5374	32	32	5	87.9	87.9	17.1	195.45	24	24	SDCBP
PFDN6	Prefoldin subunit 6	Prefoldin subunit 6;Prefoldin subunit 6	O15212;A2AB88	O15212;A2AB88	14.582	25.4088	NaN	12	12	12	77.5	77.5	77.5	85.06	15	0	PFDN6
PM20D2	Peptidase M20 domain-containing protein 2	Peptidase M20 domain-containing protein 2	Q8IYS1	Q8IYS1	47.776	25.4066	NaN	16	16	16	56.2	56.2	56.2	110.17	24	0	PM20D2
ITFG1	T-cell immunomodulatory protein	T-cell immunomodulatory protein;T-cell immunomodulatory protein;T-cell immunomodulatory protein (Fragment)	Q8TB96;F5GXC5;H3BUJ1	Q8TB96;F5GXC5;H3BUJ1	68.107	25.4065	20.8644	8	8	8	17.6	17.6	17.6	57.266	10	3	ITFG1
CBR3	Carbonyl reductase [NADPH] 3	Carbonyl reductase [NADPH] 3	O75828	O75828	30.85	25.4064	19.3545	18	16	16	78.7	68.2	68.2	65.289	17	1	CBR3
CCT8	T-complex protein 1 subunit theta	T-complex protein 1 subunit theta	P50990;H7C4C8;H7C2U0	P50990	59.62	25.4022	17.9468	44	44	44	71.5	71.5	71.5	215.25	43	2	CCT8
MT1E	Metallothionein-1E	Metallothionein-1E	P04732;H3BU80;CON__P67983;Q8N339;Q93083;P07438	P04732	6.0142	25.3954	NaN	9	6	4	100	70.5	70.5	74.78	8	0	MT1E
RPS28	40S ribosomal protein S28	40S ribosomal protein S28	P62857	P62857	7.8409	25.3921	NaN	6	6	6	60.9	60.9	60.9	14.862	6	0	RPS28
PAICS	Multifunctional protein ADE2;Phosphoribosylaminoimidazole-succinocarboxamide synthase;Phosphoribosylaminoimidazole carboxylase	Multifunctional protein ADE2;Multifunctional protein ADE2 (Fragment)	P22234;E9PBS1;D6RF62	P22234;E9PBS1	47.079	25.3906	NaN	23	23	23	51.1	51.1	51.1	189.86	25	0	PAICS
DYNLL2	Dynein light chain 2, cytoplasmic	Dynein light chain 2, cytoplasmic	Q96FJ2	Q96FJ2	10.35	25.3738	17.9825	8	8	4	75.3	75.3	44.9	51.762	12	0	DYNLL2
MAP2K2	Dual specificity mitogen-activated protein kinase kinase 2	Dual specificity mitogen-activated protein kinase kinase 2;Dual-specificity mitogen-activated protein kinase kinase 2	P36507;G5E9C7;A0A1B0GUL7;M0R1B6	P36507;G5E9C7	44.424	25.3736	15.1741	25	25	15	49.5	49.5	31.5	133.35	22	0	MAP2K2
RPL22	60S ribosomal protein L22	60S ribosomal protein L22;60S ribosomal protein L22 (Fragment);60S ribosomal protein L22;60S ribosomal protein L22 (Fragment);Uncharacterized protein;60S ribosomal protein L22 (Fragment)	P35268;K7EMH1;K7ERI7;K7EP65;K7EKS7;K7ELC4;K7EJT5	P35268;K7EMH1;K7ERI7;K7EP65;K7EKS7;K7ELC4	14.787	25.3629	NaN	5	5	5	49.2	49.2	49.2	32.946	3	0	RPL22
RPL27A	60S ribosomal protein L27a	60S ribosomal protein L27a;60S ribosomal protein L27a;60S ribosomal protein L27a	P46776;E9PJD9;E9PLL6;E9PLX7	P46776;E9PJD9;E9PLL6	16.561	25.3605	19.795	9	9	9	56.1	56.1	56.1	24.269	6	1	RPL27A
RPS19	40S ribosomal protein S19	40S ribosomal protein S19;40S ribosomal protein S19 (Fragment);40S ribosomal protein S19 (Fragment);40S ribosomal protein S19 (Fragment);40S ribosomal protein S19 (Fragment)	P39019;M0R2L9;M0QXK4;M0QYF7;M0R140;A0A075B6E2	P39019;M0R2L9;M0QXK4;M0QYF7;M0R140	16.06	25.3371	19.5385	14	14	14	73.8	73.8	73.8	28.301	16	0	RPS19
COTL1	Coactosin-like protein	Coactosin-like protein;Coactosin-like protein	Q14019;H3BT58	Q14019;H3BT58	15.945	25.3356	19.4743	11	11	11	72.5	72.5	72.5	79.639	12	0	COTL1
ARL3	ADP-ribosylation factor-like protein 3	ADP-ribosylation factor-like protein 3	P36405	P36405	20.455	25.3351	17.9722	16	16	16	68.1	68.1	68.1	128.86	21	0	ARL3
GNMT	Glycine N-methyltransferase	Glycine N-methyltransferase	Q14749	Q14749	32.742	25.3212	16.949	18	18	18	72.9	72.9	72.9	179.04	21	1	GNMT
PNPO	Pyridoxine-5-phosphate oxidase	Pyridoxine-5-phosphate oxidase;Pyridoxine-5-phosphate oxidase (Fragment);Pyridoxine-5-phosphate oxidase (Fragment)	Q9NVS9;J3QQV6;J3QQZ9;A0A286YFL3	Q9NVS9;J3QQV6;J3QQZ9	29.988	25.3074	NaN	8	8	8	44.8	44.8	44.8	35.094	12	0	PNPO
PSMB6	Proteasome subunit beta type-6	Proteasome subunit beta type-6	P28072;A0A087X2I4;I3L3X7	P28072	25.357	25.292	19.8974	9	9	9	46.9	46.9	46.9	74.714	10	1	PSMB6
DAK	Bifunctional ATP-dependent dihydroxyacetone kinase/FAD-AMP lyase (cyclizing);ATP-dependent dihydroxyacetone kinase;FAD-AMP lyase (cyclizing)	Triokinase/FMN cyclase;Triokinase/FMN cyclase (Fragment);Triokinase/FMN cyclase (Fragment)	Q3LXA3;H0YCY6;I3L252;E9PJG8;E9PQR1	Q3LXA3;H0YCY6;I3L252	58.946	25.2916	15.2477	32	32	32	54.1	54.1	54.1	289.69	42	0	DAK
CRYL1	Lambda-crystallin homolog	Lambda-crystallin homolog;Crystallin, lambda 1, isoform CRA_c;Lambda-crystallin homolog;Lambda-crystallin homolog	Q9Y2S2;A0A2R8Y4K2;A0A2R8YCZ4;A0A2R8YFQ7;A0A087WW38;A0A2R8Y7B4;A0A2R8Y5S5	Q9Y2S2;A0A2R8Y4K2;A0A2R8YCZ4;A0A2R8YFQ7	35.419	25.2791	NaN	25	25	25	75.5	75.5	75.5	98.36	17	0	CRYL1
PRKAR2B	cAMP-dependent protein kinase type II-beta regulatory subunit	cAMP-dependent protein kinase type II-beta regulatory subunit	P31323	P31323	46.302	25.2608	NaN	24	19	19	52.6	46.9	46.9	83.909	23	0	PRKAR2B
NDRG3	Protein NDRG3	Protein NDRG3;Protein NDRG3;NDRG family member 3, isoform CRA_c	Q9UGV2;F8WBF9;Q5TH30;Q5TH29	Q9UGV2;F8WBF9;Q5TH30	41.408	25.258	17.5798	16	16	16	50.4	50.4	50.4	149.12	15	0	NDRG3
CHMP4A	Charged multivesicular body protein 4a	Charged multivesicular body protein 4a;Charged multivesicular body protein 4a;Charged multivesicular body protein 4a (Fragment);Transmembrane 9 superfamily member;Charged multivesicular body protein 4a (Fragment)	Q9BY43;E9PQI5;E9PQ80;E9PSI1;H0YI89;H0YIN6	Q9BY43;E9PQI5;E9PQ80;E9PSI1;H0YI89	25.098	25.2573	17.8492	15	15	15	47.7	47.7	47.7	81.242	14	0	CHMP4A
SLC9A3R2	Na(+)/H(+) exchange regulatory cofactor NHE-RF2	Na(+)/H(+) exchange regulatory cofactor NHE-RF2	Q15599;H3BN50;H3BQS0;H3BUQ9;H3BMF5	Q15599	37.413	25.2535	22.2082	18	18	18	48.4	48.4	48.4	70.129	19	6	SLC9A3R2
DYNC1I2	Cytoplasmic dynein 1 intermediate chain 2	Cytoplasmic dynein 1 intermediate chain 2;Cytoplasmic dynein 1 intermediate chain 2 (Fragment);Cytoplasmic dynein 1 intermediate chain 2 (Fragment);Cytoplasmic dynein 1 intermediate chain 2 (Fragment)	Q13409;E7ETL8;E7EMU4;E7EV09;E7ERR6;E7ERH4;E5RFE1;C9J3E7;E5RJ75;O14576	Q13409;E7ETL8;E7EMU4;E7EV09	71.456	25.253	18.4537	19	19	10	36.7	36.7	19.9	152.1	24	0	DYNC1I2
ALOX15B	Arachidonate 15-lipoxygenase B	Arachidonate 15-lipoxygenase B;Arachidonate 15-lipoxygenase B	O15296;I3L1D5	O15296;I3L1D5	75.856	25.2521	18.5334	36	36	36	66.3	66.3	66.3	157.76	37	4	ALOX15B
SRC	Proto-oncogene tyrosine-protein kinase Src	Proto-oncogene tyrosine-protein kinase Src	P12931;H2E272;H7C3Z8;H7C074;Q9H3Y6;P08581;Q04912	P12931	59.834	25.2475	17.4886	32	32	24	71.3	71.3	64.6	106.94	30	1	SRC
CACYBP	Calcyclin-binding protein	Calcyclin-binding protein	Q9HB71;B2ZWH1	Q9HB71	26.21	25.2365	17.6015	12	12	12	50	50	50	96.156	12	1	CACYBP
CD81	Tetraspanin;CD81 antigen	Tetraspanin;Tetraspanin (Fragment);Tetraspanin (Fragment);Tetraspanin (Fragment);Tetraspanin;Tetraspanin;CD81 antigen	E9PJK1;E9PRJ8;H0YDL9;H0YDJ9;E9PIF1;A6NMH8;P60033	E9PJK1;E9PRJ8;H0YDL9;H0YDJ9;E9PIF1;A6NMH8;P60033	17.963	25.2331	22.2045	4	4	3	38.2	38.2	26.1	40.299	5	5	CD81
FKBP3	Peptidyl-prolyl cis-trans isomerase FKBP3	Peptidyl-prolyl cis-trans isomerase FKBP3	Q00688;G3V5F2	Q00688	25.177	25.2289	15.9728	18	18	18	74.6	74.6	74.6	74.862	22	0	FKBP3
RBX1	E3 ubiquitin-protein ligase RBX1;E3 ubiquitin-protein ligase RBX1, N-terminally processed	E3 ubiquitin-protein ligase RBX1	P62877	P62877	12.274	25.2242	NaN	5	5	5	34.3	34.3	34.3	19.013	5	0	RBX1
GGCT	Gamma-glutamylcyclotransferase	Gamma-glutamylcyclotransferase;Uncharacterized protein;Gamma-glutamylcyclotransferase	O75223;M0QZK8;B8ZZK2;H7BZK5;A0A0B4J1Y4	O75223;M0QZK8;B8ZZK2	21.007	25.2181	17.504	14	14	14	78.7	78.7	78.7	77.741	18	0	GGCT
RPL38	60S ribosomal protein L38	60S ribosomal protein L38;60S ribosomal protein L38;60S ribosomal protein L38;60S ribosomal protein L38 (Fragment)	J3KT73;J3QL01;P63173;J3KSP2	J3KT73;J3QL01;P63173;J3KSP2	7.5649	25.2175	18.1599	4	4	4	43.8	43.8	43.8	10.867	5	0	RPL38
HAGH	Hydroxyacylglutathione hydrolase, mitochondrial	Hydroxyacylglutathione hydrolase, mitochondrial (Fragment);Hydroxyacylglutathione hydrolase, mitochondrial;Hydroxyacylglutathione hydrolase, mitochondrial	H3BPK3;Q16775;H3BPQ4;H3BV79;H3BQW8	H3BPK3;Q16775;H3BPQ4	26.305	25.2112	NaN	11	11	11	51.5	51.5	51.5	119.95	17	0	HAGH
PPP1R11	Protein phosphatase 1 regulatory subunit 11	E3 ubiquitin-protein ligase PPP1R11;E3 ubiquitin-protein ligase PPP1R11	O60927;Q5SRK2	O60927;Q5SRK2	13.952	25.2038	NaN	10	10	10	64.3	64.3	64.3	33.545	14	0	PPP1R11
AAMDC	Mth938 domain-containing protein	Mth938 domain-containing protein;Mth938 domain-containing protein;Mth938 domain-containing protein;Mth938 domain-containing protein;Mth938 domain-containing protein;Mth938 domain-containing protein;Mth938 domain-containing protein	Q9H7C9;E9PNP3;E9PR47;E9PIQ4;E9PJP1;E9PLK9;K4DI89	Q9H7C9;E9PNP3;E9PR47;E9PIQ4;E9PJP1;E9PLK9;K4DI89	13.332	25.1996	NaN	11	11	11	94.3	94.3	94.3	43.124	16	0	AAMDC
EML2	Echinoderm microtubule-associated protein-like 2	Echinoderm microtubule-associated protein-like 2;Echinoderm microtubule-associated protein-like 2;Echinoderm microtubule-associated protein-like 2;Echinoderm microtubule-associated protein-like 2	O95834;K7EIK7;A0A0C4DGQ7;C9JRL6;K7EKG3;K7EKU5;K7EII6;K7ERY9;K7EIM1;K7ELI8;K7EQR0;K7ERR2;K7ELB2;K7ERR9;Q6ZMW3	O95834;K7EIK7;A0A0C4DGQ7;C9JRL6	70.678	25.1969	19.5521	32	32	31	59.3	59.3	58.1	212.26	30	2	EML2
STAMBP	STAM-binding protein	STAM-binding protein;STAM-binding protein (Fragment);STAM-binding protein	O95630;C9JK83;F5H5B9;C9JEK5;C9JZ93	O95630;C9JK83;F5H5B9	48.076	25.194	17.343	24	24	24	55.9	55.9	55.9	86.434	39	0	STAMBP
CD2AP	CD2-associated protein	CD2-associated protein	Q9Y5K6	Q9Y5K6	71.45	25.1925	18.2041	27	27	27	50.1	50.1	50.1	136.49	31	1	CD2AP
ACTR2	Actin-related protein 2	Actin-related protein 2;ARP2 actin-related protein 2 homolog (Yeast), isoform CRA_d	P61160;F5H6T1;A0A1B0GWD0;A0A1B0GWH0	P61160;F5H6T1	44.76	25.1917	NaN	19	19	19	52.5	52.5	52.5	89.37	20	0	ACTR2
GSTM2	Glutathione S-transferase Mu 2	Glutathione S-transferase Mu 2;Glutathione S-transferase;Glutathione S-transferase;Glutathione S-transferase Mu 2;Glutathione S-transferase Mu 2 (Fragment)	P28161;E9PHN6;F6XZQ7;E9PHN7;E9PLF1;E9PGV1	P28161;E9PHN6;F6XZQ7;E9PHN7;E9PLF1	25.744	25.188	17.104	20	20	12	79.8	79.8	61.9	79.301	22	0	GSTM2
MAT2A	S-adenosylmethionine synthase isoform type-2	S-adenosylmethionine synthase isoform type-2	P31153	P31153	43.66	25.1779	15.6999	20	20	20	42.8	42.8	42.8	62.728	20	0	MAT2A
MAPK1	Mitogen-activated protein kinase 1	Mitogen-activated protein kinase 1	P28482	P28482	41.389	25.173	NaN	22	22	17	68.1	68.1	57.2	71.216	22	0	MAPK1
RNASE4	Ribonuclease 4	Ribonuclease 4	P34096	P34096	16.84	25.1656	21.6121	11	11	11	68	68	68	22.689	11	0	RNASE4
MT1F	Metallothionein-1F	Metallothionein-1F	P04733;H3BRY8	P04733	6.0863	25.1654	NaN	7	5	5	91.8	91.8	91.8	22.393	4	0	MT1F
STK39	STE20/SPS1-related proline-alanine-rich protein kinase	STE20/SPS1-related proline-alanine-rich protein kinase	Q9UEW8	Q9UEW8	59.473	25.1517	17.9125	15	15	13	31.7	31.7	28.3	135.55	15	1	STK39
GAMT	Guanidinoacetate N-methyltransferase	Guanidinoacetate N-methyltransferase;Guanidinoacetate N-methyltransferase	Q14353;A0A1W2PR36;K7EM34	Q14353;A0A1W2PR36	26.318	25.1505	18.2439	7	7	7	52.5	52.5	52.5	26.028	13	0	GAMT
OSTF1	Osteoclast-stimulating factor 1	Osteoclast-stimulating factor 1	Q92882	Q92882	23.787	25.1473	17.7294	11	11	11	36.4	36.4	36.4	68.983	7	0	OSTF1
STX12	Syntaxin-12	Syntaxin-12;Syntaxin-12 (Fragment)	Q86Y82;B1AJQ6	Q86Y82;B1AJQ6	31.642	25.142	18.0194	14	14	14	47.5	47.5	47.5	98.542	15	0	STX12
GPD1L	Glycerol-3-phosphate dehydrogenase 1-like protein	Glycerol-3-phosphate dehydrogenase 1-like protein;Glycerol-3-phosphate dehydrogenase 1-like protein (Fragment)	Q8N335;C9JFA7;C9K0P5;C9JM46	Q8N335;C9JFA7	38.418	25.129	19.4864	32	32	32	86.6	86.6	86.6	176.15	28	1	GPD1L
PFDN4	Prefoldin subunit 4	Prefoldin subunit 4;Prefoldin subunit 4	Q9NQP4;E9PQY2	Q9NQP4;E9PQY2	15.314	25.1276	NaN	8	8	8	55.2	55.2	55.2	20.095	7	0	PFDN4
C9orf152	Uncharacterized protein C9orf152	Uncharacterized protein C9orf152	Q5JTZ5	Q5JTZ5	26.314	25.1237	NaN	13	13	13	71.1	71.1	71.1	74.815	14	0	C9orf152
PMVK	Phosphomevalonate kinase	Phosphomevalonate kinase	Q15126	Q15126	21.995	25.1208	NaN	16	16	16	68.8	68.8	68.8	46.886	16	0	PMVK
GSPT1	Eukaryotic peptide chain release factor GTP-binding subunit ERF3A	Eukaryotic peptide chain release factor GTP-binding subunit ERF3A;Eukaryotic peptide chain release factor GTP-binding subunit ERF3A (Fragment)	P15170;H3BR35;H3BSV8	P15170;H3BR35	55.755	25.1178	19.8324	25	25	9	56.9	56.9	34.3	133.25	28	2	GSPT1
RAB5A	Ras-related protein Rab-5A	Ras-related protein Rab-5A	P20339;F8WCY6;F8WD79;F8VVZ0;F8VWZ7	P20339	23.658	25.117	16.0643	14	9	9	74.4	52.1	52.1	46.543	7	0	RAB5A
PPM1A	Protein phosphatase 1A	Protein phosphatase 1A	P35813;E9PKB5;E9PJN3;E9PL75	P35813	42.447	25.1137	16.5711	23	23	21	62.6	62.6	56.8	118.89	28	0	PPM1A
CD47	Leukocyte surface antigen CD47	Leukocyte surface antigen CD47 (Fragment);Leukocyte surface antigen CD47	A0A2R8Y484;Q08722	A0A2R8Y484;Q08722	20.313	25.1102	19.1184	7	7	7	20.2	20.2	20.2	16.927	7	2	CD47
TCP1	T-complex protein 1 subunit alpha	T-complex protein 1 subunit alpha;T-complex protein 1 subunit alpha;T-complex protein 1 subunit alpha;T-complex protein 1 subunit alpha	P17987;E7ERF2;E7EQR6;F5H282;F5GZ03;F5H136;F5H676;F5GZI8;F5GYL4;F5H726;F5H7Y1	P17987;E7ERF2;E7EQR6;F5H282	60.343	25.1073	19.0023	37	37	37	72.1	72.1	72.1	185.07	35	1	TCP1
LASP1	LIM and SH3 domain protein 1	LIM and SH3 domain protein 1;LIM and SH3 domain protein 1 (Fragment)	Q14847;C9J9W2;F6S2S5;K7ESD6	Q14847;C9J9W2	29.717	25.1061	NaN	18	18	18	52.9	52.9	52.9	76.277	20	0	LASP1
DNAJB1	DnaJ homolog subfamily B member 1	DnaJ homolog subfamily B member 1;DnaJ homolog subfamily B member 1 (Fragment)	P25685;M0R080;M0QYT3;M0QXK0;M0QZD0;M0R1D6;M0R128;A0A1B0GX60	P25685;M0R080	38.044	25.0969	16.72	19	19	18	46.5	46.5	46.5	62.253	22	0	DNAJB1
EIF4A1	Eukaryotic initiation factor 4A-I	Eukaryotic initiation factor 4A-I;Eukaryotic initiation factor 4A-I;Eukaryotic initiation factor 4A-I (Fragment);Eukaryotic initiation factor 4A-I (Fragment);Eukaryotic initiation factor 4A-I (Fragment)	P60842;J3KT12;J3QS69;J3KSZ0;J3QL43;J3KTB5;J3QR64;J3KTN0;J3QLN6;J3QL52;J3QKZ9;J3KS25;J3KT04;J3KS93;E7EMV8;J3KSN7	P60842;J3KT12;J3QS69;J3KSZ0;J3QL43	46.153	25.0945	19.6903	15	15	8	43.8	43.8	25.9	52.117	13	2	EIF4A1
PPM1H	Protein phosphatase 1H	Protein phosphatase 1H	Q9ULR3;Q5JR12	Q9ULR3	56.447	25.0861	NaN	27	27	26	60.7	60.7	58.9	252.44	34	0	PPM1H
KIAA1598	Shootin-1	Shootin-1	A0MZ66	A0MZ66	71.639	25.0856	16.0427	44	44	44	63.4	63.4	63.4	323.31	51	0	KIAA1598
RPLP2	60S acidic ribosomal protein P2	60S acidic ribosomal protein P2	P05387;H0YDD8	P05387	11.665	25.083	NaN	7	7	7	46.1	46.1	46.1	55.318	7	0	RPLP2
RPL21	60S ribosomal protein L21	60S ribosomal protein L21;60S ribosomal protein L21 (Fragment);60S ribosomal protein L21	P46778;M0R181;G3V1B3	P46778;M0R181;G3V1B3	18.565	25.0779	NaN	9	9	9	43.8	43.8	43.8	23.188	8	0	RPL21
RASEF	Ras and EF-hand domain-containing protein	Ras and EF-hand domain-containing protein	Q8IZ41	Q8IZ41	82.878	25.0742	13.1793	35	35	35	55.4	55.4	55.4	163.68	39	0	RASEF
PRKACA	cAMP-dependent protein kinase catalytic subunit alpha	cAMP-dependent protein kinase catalytic subunit alpha;Protein kinase A-alpha (Fragment);cAMP-dependent protein kinase catalytic subunit alpha (Fragment)	P17612;Q15136;K7ERP6;K7ENJ5;K7EMV1	P17612;Q15136;K7ERP6	40.589	25.072	NaN	22	9	9	54.4	25.9	25.9	49.608	12	0	PRKACA
CCT7	T-complex protein 1 subunit eta	T-complex protein 1 subunit eta	Q99832;F8WAM2;F8WBP8;A0A0D9SG95	Q99832	59.366	25.0715	19.2099	32	32	32	65.4	65.4	65.4	197.21	31	2	CCT7
PAK2	Serine/threonine-protein kinase PAK 2;PAK-2p27;PAK-2p34	Serine/threonine-protein kinase PAK 2	Q13177;H7C1X3;B1AKS5	Q13177	58.042	25.0695	NaN	32	32	22	76.1	76.1	58.8	148.79	42	0	PAK2
EIF6	Eukaryotic translation initiation factor 6	Eukaryotic translation initiation factor 6;Eukaryotic translation initiation factor 6 (Fragment)	P56537;B7ZBH1;A0A0U1RQV5;F8WD20;A0A0B4J1Y7;F8WDS6	P56537;B7ZBH1	26.599	25.0682	NaN	9	9	9	49	49	49	122.36	9	0	EIF6
LAMTOR2	Ragulator complex protein LAMTOR2	Ragulator complex protein LAMTOR2	Q9Y2Q5	Q9Y2Q5	13.507	25.0625	NaN	6	6	6	70.4	70.4	70.4	20.702	6	0	LAMTOR2
RPL7A	60S ribosomal protein L7a	60S ribosomal protein L7a;60S ribosomal protein L7a (Fragment);60S ribosomal protein L7a	P62424;Q5T8U3;Q5T8U2	P62424;Q5T8U3;Q5T8U2	29.995	25.0585	NaN	16	16	16	55.6	55.6	55.6	143.08	16	0	RPL7A
VPS4B	Vacuolar protein sorting-associated protein 4B	Vacuolar protein sorting-associated protein 4B	O75351;K7EL71;K7EKZ3;Q6PIW4	O75351	49.301	25.0526	NaN	29	29	20	62.4	62.4	49.5	106.02	30	0	VPS4B
RPL10	60S ribosomal protein L10	60S ribosomal protein L10 (Fragment);60S ribosomal protein L10;60S ribosomal protein L10;60S ribosomal protein L10	X1WI28;P27635;F8W7C6;A0A087WV22;H7C123;B8A6G2;H7C2C5;A6QRI9;Q96L21	X1WI28;P27635;F8W7C6;A0A087WV22	22.975	25.0514	17.5386	12	12	12	54	54	54	60.699	11	1	RPL10
GSS	Glutathione synthetase	Glutathione synthetase;Glutathione synthetase;Glutathione synthetase (Fragment)	P48637;A0A2R8Y430;A0A2R8Y5T7;A0A2R8Y6Q7;A0A2R8Y7I7;A0A2R8YF34;A0A2R8Y2X9;A0A2R8Y6Y6;A0A2R8Y4V9;A0A2R8Y790;A0A2R8Y446;A0A0S2Z4J7;A0A2R8Y2F2	P48637;A0A2R8Y430;A0A2R8Y5T7	52.384	25.0341	NaN	25	25	25	67.9	67.9	67.9	125.5	30	0	GSS
YWHAH	14-3-3 protein eta	14-3-3 protein eta;14-3-3 protein eta (Fragment)	Q04917;A2IDB2;F8WEB6;A2IDB1	Q04917;A2IDB2	28.218	25.0336	17.4465	18	11	11	57.3	46.7	46.7	60.963	14	0	YWHAH
ARF1	ADP-ribosylation factor 1	ADP-ribosylation factor 1	P84077	P84077	20.697	25.0325	19.0149	10	10	1	78.5	78.5	16	90.369	11	0	ARF1
CAPN5	Calpain-5	Calpain-5;Calpain-5;Calpain-5 (Fragment)	E7EV01;O15484;A0A3B3IRX8;K7EP62;E9PS73	E7EV01;O15484;A0A3B3IRX8	77.469	25.0304	21.1396	27	27	27	40	40	40	106.99	31	7	CAPN5
RPL8	60S ribosomal protein L8	60S ribosomal protein L8;60S ribosomal protein L8 (Fragment);60S ribosomal protein L8 (Fragment);60S ribosomal protein L8	P62917;E9PKZ0;E9PKU4;G3V1A1;E9PP36	P62917;E9PKZ0;E9PKU4;G3V1A1	28.024	25.023	NaN	13	13	13	50.6	50.6	50.6	80.688	16	0	RPL8
PAFAH1B3	Platelet-activating factor acetylhydrolase IB subunit gamma	Platelet-activating factor acetylhydrolase IB subunit gamma;Platelet-activating factor acetylhydrolase IB subunit gamma (Fragment);Platelet-activating factor acetylhydrolase IB subunit gamma (Fragment)	Q15102;M0R389;M0R1K3;M0QZT2;M0QXS6;M0R323	Q15102;M0R389;M0R1K3	25.734	25.0215	19.4547	14	14	14	90.9	90.9	90.9	83.585	19	2	PAFAH1B3
MYL12A	Myosin regulatory light chain 12A;Myosin regulatory light chain 12B	Myosin regulatory light chain 12A;Myosin regulatory light chain 12A;Myosin regulatory light chain 12B	J3QRS3;P19105;O14950;J3KTJ1;P24844	J3QRS3;P19105;O14950	20.457	25.0045	17.1122	7	7	7	42.4	42.4	42.4	24.41	6	0	MYL12A
SNX6	Sorting nexin-6;Sorting nexin-6, N-terminally processed	Sorting nexin-6;Sorting nexin	Q9UNH7;A0A0A0MRI2;G3V5X9;H0YJF8;G3V4Z5;G3V2U1;Q86XE0;G3V5U2	Q9UNH7;A0A0A0MRI2	46.648	24.9971	15.9459	26	26	26	59.1	59.1	59.1	121.58	26	1	SNX6
ACTR1A	Alpha-centractin	Alpha-centractin;Alpha-centractin;Alpha-centractin	P61163;R4GMT0;A0A1B0GVS3	P61163;R4GMT0;A0A1B0GVS3	42.613	24.9931	18.0572	19	19	12	65.2	65.2	44.7	117.72	17	0	ACTR1A
CAPN1	Calpain-1 catalytic subunit	Calpain-1 catalytic subunit	P07384;E9PLX0;E9PJJ3;E9PLC9;E9PMC6;E9PJA6;E9PSA6;E9PQB3;E9PRM1;E9PIA9;E9PL37	P07384	81.889	24.9882	17.2234	37	37	37	43.3	43.3	43.3	150.46	22	0	CAPN1
EFHD2	EF-hand domain-containing protein D2	EF-hand domain-containing protein D2	Q96C19;H0Y4Y4;A0A087X1Z2;C9JTV4;Q8WYH2	Q96C19	26.697	24.9766	NaN	15	15	13	52.9	52.9	48.3	58.015	15	0	EFHD2
LYPLA2	Acyl-protein thioesterase 2	Acyl-protein thioesterase 2;Acyl-protein thioesterase 2;Acyl-protein thioesterase 2 (Fragment)	O95372;Q5QPQ0;Q5QPQ1;Q5QPQ3;Q5QPQ2;Q5QPN9;Q5QPN5	O95372;Q5QPQ0;Q5QPQ1	24.737	24.9762	16.7184	11	11	11	63.6	63.6	63.6	57.661	8	1	LYPLA2
RAB35	Ras-related protein Rab-35	Ras-related protein Rab-35;Ras-related protein Rab-35 (Fragment)	Q15286;F5H157;F5H7F8	Q15286;F5H157	23.025	24.9525	20.07	11	10	10	57.7	51.2	51.2	46.925	13	2	RAB35
MAT2B	Methionine adenosyltransferase 2 subunit beta	Methionine adenosyltransferase 2 subunit beta	Q9NZL9;H7C0X7;E5RJR3	Q9NZL9	37.551	24.9487	17.4388	15	15	15	67.4	67.4	67.4	66.528	24	0	MAT2B
HRSP12	Ribonuclease UK114	2-iminobutanoate/2-iminopropanoate deaminase;2-iminobutanoate/2-iminopropanoate deaminase (Fragment);2-iminobutanoate/2-iminopropanoate deaminase (Fragment)	P52758;H0YB34;H0YBX3	P52758;H0YB34;H0YBX3	14.494	24.9423	NaN	8	8	8	78.8	78.8	78.8	33.254	8	0	HRSP12
RTCB	tRNA-splicing ligase RtcB homolog	tRNA-splicing ligase RtcB homolog	Q9Y3I0	Q9Y3I0	55.21	24.9422	NaN	25	25	25	61.8	61.8	61.8	109.31	25	0	RTCB
PPP1CB	Serine/threonine-protein phosphatase PP1-beta catalytic subunit;Serine/threonine-protein phosphatase	Serine/threonine-protein phosphatase PP1-beta catalytic subunit;Serine/threonine-protein phosphatase (Fragment);Serine/threonine-protein phosphatase (Fragment)	P62140;E7ETD8;C9JP48;C9J9S3;H0Y3Y6	P62140;E7ETD8;C9JP48	37.186	24.9398	19.4957	14	14	5	41.9	41.9	14.7	52.136	14	0	PPP1CB
GOT1	Aspartate aminotransferase, cytoplasmic	Aspartate aminotransferase, cytoplasmic	P17174	P17174	46.247	24.9367	NaN	18	18	18	53	53	53	76.15	15	0	GOT1
NPEPPS	Puromycin-sensitive aminopeptidase	Aminopeptidase;Puromycin-sensitive aminopeptidase	E9PLK3;P55786;A6NEC2;H0YDG0;E9PP11;E9PJ74;E9PRQ5;E9PJY4;E9PPD4;H0YCQ5;E9PJF9;E9PPZ2	E9PLK3;P55786	102.99	24.9339	17.056	46	46	46	56.3	56.3	56.3	251.14	38	1	NPEPPS
PFDN5	Prefoldin subunit 5	Prefoldin subunit 5;Prefoldin subunit 5 (Fragment);Prefoldin subunit 5	Q99471;H3BPF6;H3BMQ1;F8VNW6;F8VQZ2	Q99471;H3BPF6;H3BMQ1	17.328	24.9327	NaN	11	11	11	93.5	93.5	93.5	36.233	10	0	PFDN5
TPM3		Tropomyosin alpha-3 chain;Tropomyosin alpha-3 chain	A0A087WWU8;D6R904;K7EP68;D6RFM2	A0A087WWU8;D6R904	26.42	24.9294	NaN	24	14	0	70	45.8	0	50.492	14	0	TPM3
FLNB	Filamin-B	Filamin-B;Filamin-B	O75369;E7EN95;A0A0A0MT44;Q14315;F8WE98;A0A087WWY3;Q60FE5;P21333;H7C5L4;A0A0C4DGA1	O75369;E7EN95	278.16	24.9142	15.1239	128	128	128	55.9	55.9	55.9	323.31	126	0	FLNB
PYGB	Glycogen phosphorylase, brain form	Glycogen phosphorylase, brain form	P11216;H0Y4Z6	P11216	96.695	24.9129	18.797	60	60	50	60.3	60.3	52.3	272.29	48	2	PYGB
TRMT112	Multifunctional methyltransferase subunit TRM112-like protein	Multifunctional methyltransferase subunit TRM112-like protein;Multifunctional methyltransferase subunit TRM112-like protein;Multifunctional methyltransferase subunit TRM112-like protein	Q9UI30;F5GX77;F5GYQ2	Q9UI30;F5GX77;F5GYQ2	14.199	24.8996	NaN	9	9	9	80	80	80	48.47	8	0	TRMT112
PFDN1	Prefoldin subunit 1	Prefoldin subunit 1;Prefoldin subunit 1	O60925;E5RGS4	O60925;E5RGS4	14.21	24.8993	NaN	14	14	14	91.8	91.8	91.8	55.001	8	0	PFDN1
DNAJA1	DnaJ homolog subfamily A member 1	DnaJ homolog subfamily A member 1	P31689	P31689	44.868	24.8953	17.1936	14	14	14	41.3	41.3	41.3	76.484	22	0	DNAJA1
PPP3R1	Calcineurin subunit B type 1	Calcineurin subunit B type 1;Calcineurin subunit B type 1;Calcineurin subunit B type 1;Uncharacterized protein	F6U1T9;D3YTA9;P63098;H7BYZ3	F6U1T9;D3YTA9;P63098;H7BYZ3	18.208	24.8933	NaN	6	6	6	61.9	61.9	61.9	59.261	9	0	PPP3R1
RPSA	40S ribosomal protein SA	40S ribosomal protein SA (Fragment);40S ribosomal protein SA;40S ribosomal protein SA;40S ribosomal protein SA (Fragment)	C9J9K3;A0A0C4DG17;P08865;F8WD59	C9J9K3;A0A0C4DG17;P08865;F8WD59	29.404	24.891	18.6666	12	12	12	66.5	66.5	66.5	151.01	8	1	RPSA
ATP9A	Probable phospholipid-transporting ATPase IIA;Phospholipid-transporting ATPase	Probable phospholipid-transporting ATPase IIA;Phospholipid-transporting ATPase	O75110;A0A0A0MR22;O43861;K7EQQ5;F6XUP2	O75110;A0A0A0MR22	118.58	24.8899	18.9111	38	38	38	34.9	34.9	34.9	218.38	39	0	ATP9A
DDI2	Protein DDI1 homolog 2	Protein DDI1 homolog 2	Q5TDH0;H0YII4;H0YI90;Q8WTU0	Q5TDH0	44.522	24.886	15.871	23	23	23	57.9	57.9	57.9	118.82	19	0	DDI2
NT5C	5(3)-deoxyribonucleotidase, cytosolic type	5(3)-deoxyribonucleotidase, cytosolic type;5(3)-deoxyribonucleotidase, cytosolic type;5(3)-deoxyribonucleotidase, cytosolic type (Fragment);5(3)-deoxyribonucleotidase, cytosolic type	Q8TCD5;J3KSY6;J3KSX6;J3KRC4;J3QQX8	Q8TCD5;J3KSY6;J3KSX6;J3KRC4	23.382	24.8819	18.5116	14	14	14	72.1	72.1	72.1	41.758	10	1	NT5C
RANBP1	Ran-specific GTPase-activating protein	Ran-specific GTPase-activating protein;Ran-specific GTPase-activating protein;Ran-specific GTPase-activating protein (Fragment);Ran-specific GTPase-activating protein (Fragment);Ran-specific GTPase-activating protein (Fragment)	F6WQW2;P43487;C9JXG8;C9JGV6;C9JJ34;C9JDM3;C9JIC6	F6WQW2;P43487;C9JXG8;C9JGV6;C9JJ34	31.904	24.8801	NaN	8	8	8	32.4	32.4	32.4	30.877	13	0	RANBP1
GALK1	Galactokinase	Galactokinase	P51570;K7EII7;K7ERJ9;K7ERN9	P51570	42.272	24.8768	NaN	23	23	23	67.1	67.1	67.1	111.8	19	0	GALK1
PSMD10	26S proteasome non-ATPase regulatory subunit 10	26S proteasome non-ATPase regulatory subunit 10;26S proteasome non-ATPase regulatory subunit 10;26S proteasome non-ATPase regulatory subunit 10;26S proteasome non-ATPase regulatory subunit 10	B1AJY5;O75832;B1AJY7;B1AJY6	B1AJY5;O75832;B1AJY7;B1AJY6	20.217	24.8743	NaN	8	8	8	75.1	75.1	75.1	62.98	7	0	PSMD10
FDPS	Farnesyl pyrophosphate synthase	Farnesyl pyrophosphate synthase;Farnesyl diphosphate synthase (Farnesyl pyrophosphate synthetase, dimethylallyltranstransferase, geranyltranstransferase), isoform CRA_a	P14324;A0A087X090;A0A087WVN4;A0A087X1D8;A0A087WTP2	P14324;A0A087X090	48.275	24.8731	19.7696	11	11	11	27.4	27.4	27.4	92.492	15	0	FDPS
RBP7	Retinoid-binding protein 7	Retinoid-binding protein 7	Q96R05	Q96R05	15.536	24.8724	NaN	6	6	6	44.8	44.8	44.8	13.902	4	0	RBP7
CKAP5	Cytoskeleton-associated protein 5	Cytoskeleton-associated protein 5	Q14008;H0YDX5;E9PQH5;H0YCF6;H0YEK7	Q14008	225.49	24.8702	17.5549	89	89	89	47.2	47.2	47.2	323.31	100	3	CKAP5
PDCD10	Programmed cell death protein 10	Programmed cell death protein 10;Programmed cell death protein 10;Programmed cell death protein 10 (Fragment);Programmed cell death protein 10 (Fragment);Programmed cell death protein 10 (Fragment);Programmed cell death protein 10 (Fragment);Programmed cel	Q9BUL8;C9J6F3;C9J5C3;H7C5M9;C9JSA3;C9JND6;C9J363;C9J932;F8WDF3	Q9BUL8;C9J6F3;C9J5C3;H7C5M9;C9JSA3;C9JND6;C9J363	24.701	24.8675	NaN	9	9	9	43.9	43.9	43.9	49.95	13	0	PDCD10
TCEB2	Transcription elongation factor B polypeptide 2	Elongin-B;Elongin-B;Elongin-B;Elongin-B (Fragment)	Q15370;A0A0B4J296;B8ZZU8;I3L0M9	Q15370;A0A0B4J296;B8ZZU8;I3L0M9	13.133	24.8649	16.7798	10	10	10	89.8	89.8	89.8	33.16	10	0	TCEB2
ATP6V0A1	V-type proton ATPase 116 kDa subunit a isoform 1;V-type proton ATPase subunit a	V-type proton ATPase 116 kDa subunit a isoform 1;V-type proton ATPase subunit a;V-type proton ATPase subunit a;V-type proton ATPase subunit a (Fragment)	Q93050;B7Z641;B7Z2A9;K7EPG4;K7EN36;A0A2R8YGN5;Q9HBG4	Q93050;B7Z641;B7Z2A9;K7EPG4	96.412	24.8551	19.5267	27	27	18	27.2	27.2	19.5	169.1	29	3	ATP6V0A1
TUBA1C	Tubulin alpha-1C chain	Tubulin alpha-1C chain;Tubulin alpha chain;Tubulin alpha-1C chain	Q9BQE3;F5H5D3;A0A1W2PQM2	Q9BQE3;F5H5D3;A0A1W2PQM2	49.895	24.8544	20.0151	42	6	3	83.1	19.8	12.7	52.924	11	3	TUBA1C
VPS37C	Vacuolar protein sorting-associated protein 37C	Vacuolar protein sorting-associated protein 37C;Vacuolar protein sorting-associated protein 37C (Fragment)	A5D8V6;F5H4Q5	A5D8V6;F5H4Q5	38.658	24.848	25.2252	12	12	12	32.1	32.1	32.1	35.05	9	8	VPS37C
RAB10	Ras-related protein Rab-10	Ras-related protein Rab-10	P61026	P61026	22.541	24.8386	NaN	15	12	11	52.5	52.5	44	33.076	15	0	RAB10
RPL17	60S ribosomal protein L17	60S ribosomal protein L17 (Fragment);60S ribosomal protein L17 (Fragment);60S ribosomal protein L17 (Fragment);Protein RPL17-C18orf32;60S ribosomal protein L17;60S ribosomal protein L17 (Fragment);60S ribosomal protein L17 (Fragment);60S ribosomal protein	A0A087WXM6;J3QQT2;J3KRX5;A0A0A6YYL6;P18621;J3KRB3;A0A087WWH0;J3QS96;J3QLC8;A0A087WY81;A0A0A0MRF8;J3KSJ0	A0A087WXM6;J3QQT2;J3KRX5;A0A0A6YYL6;P18621;J3KRB3;A0A087WWH0;J3QS96;J3QLC8;A0A087WY81;A0A0A0MRF8	19.586	24.8371	19.5418	12	12	12	69.8	69.8	69.8	63.2	8	1	RPL17
TPD52L2	Tumor protein D54	Tumor protein D54;Tumor protein D54;Tumor protein D54	O43399;A0A087WYR3;A0A087WZ51	O43399;A0A087WYR3;A0A087WZ51	22.237	24.8331	16.3458	11	11	11	62.6	62.6	62.6	47.114	13	0	TPD52L2
RAP1A	Ras-related protein Rap-1A	Ras-related protein Rap-1A;Ras-related protein Rap-1A (Fragment)	P62834;A0A075B6Q0;F5H4H0;F5GYH7;F8WBC0	P62834;A0A075B6Q0	20.987	24.8293	NaN	16	5	5	94	41.8	41.8	42.475	4	0	RAP1A
ATP6V1D	V-type proton ATPase subunit D	V-type proton ATPase subunit D;V-type proton ATPase subunit D;V-type proton ATPase subunit D;V-type proton ATPase subunit D (Fragment)	Q9Y5K8;G3V2S6;G3V559;H0YJS0;G3V2V6;H0YJH8;G3V3T8;H0YJ55;G3V5S7;G3V341	Q9Y5K8;G3V2S6;G3V559;H0YJS0	28.262	24.825	NaN	13	13	13	50.2	50.2	50.2	115.97	12	0	ATP6V1D
STX7	Syntaxin-7	Syntaxin-7	O15400	O15400	29.815	24.8232	NaN	9	9	9	42.1	42.1	42.1	56.026	10	0	STX7
SCAMP2	Secretory carrier-associated membrane protein 2	Secretory carrier-associated membrane protein 2;Secretory carrier-associated membrane protein (Fragment);Secretory carrier-associated membrane protein;Secretory carrier-associated membrane protein (Fragment);Secretory carrier-associated membrane protein (F	O15127;H3BV04;H3BN93;H3BUB6;H3BPL9	O15127;H3BV04;H3BN93;H3BUB6;H3BPL9	36.648	24.8219	NaN	6	6	6	15.8	15.8	15.8	25.516	8	0	SCAMP2
ARPC5	Actin-related protein 2/3 complex subunit 5	Actin-related protein 2/3 complex subunit 5;Actin-related protein 2/3 complex subunit 5	O15511;B1ALC0	O15511;B1ALC0	16.32	24.8155	NaN	8	8	8	82.8	82.8	82.8	32.464	8	0	ARPC5
RRAS	Ras-related protein R-Ras	Ras-related protein R-Ras	P10301	P10301	23.48	24.8137	20.719	15	15	12	64.7	64.7	55	99.318	17	0	RRAS
BAG2	BAG family molecular chaperone regulator 2	BAG family molecular chaperone regulator 2	O95816	O95816	23.772	24.8131	NaN	14	14	14	81	81	81	59.607	15	0	BAG2
CSNK2B	Casein kinase II subunit beta	Casein kinase II subunit beta;Casein kinase II subunit beta;Casein kinase II subunit beta;Casein kinase II subunit beta;Casein kinase II subunit beta	P67870;Q5SRQ6;Q5SRQ3;N0E472;A0A0G2JM12;N0E644;A0A0G2JM58	P67870;Q5SRQ6;Q5SRQ3;N0E472;A0A0G2JM12	24.942	24.8075	NaN	10	10	10	67.4	67.4	67.4	51.82	11	0	CSNK2B
DPYSL3	Dihydropyrimidinase-related protein 3	Dihydropyrimidinase-related protein 3	Q14195;H0YBT4;H0YB87	Q14195	61.963	24.8016	NaN	21	21	18	50.7	50.7	49.5	157.4	26	0	DPYSL3
DPP4	Dipeptidyl peptidase 4;Dipeptidyl peptidase 4 membrane form;Dipeptidyl peptidase 4 soluble form	Dipeptidyl peptidase 4	P27487;F8WE17;H7C1N5;F8WBB6	P27487	88.278	24.7993	21.1988	35	35	35	37.9	37.9	37.9	157.73	20	6	DPP4
IDI1	Isopentenyl-diphosphate Delta-isomerase 1	Isopentenyl-diphosphate Delta-isomerase 1;Isopentenyl-diphosphate Delta-isomerase 1 (Fragment);Isopentenyl-diphosphate Delta-isomerase 1 (Fragment)	Q13907;C9JKM8;C9JD53;Q9BXS1	Q13907;C9JKM8;C9JD53	26.319	24.7913	NaN	11	11	11	48.5	48.5	48.5	68.804	16	0	IDI1
GALE	UDP-glucose 4-epimerase	UDP-glucose 4-epimerase;UDP-glucose 4-epimerase (Fragment);UDP-glucose 4-epimerase (Fragment)	Q14376;Q5QPP3;Q5QPP4;Q5QPP1;Q5QPP9	Q14376;Q5QPP3;Q5QPP4	38.281	24.7908	NaN	13	13	13	71.3	71.3	71.3	155.83	11	0	GALE
PRKG2	cGMP-dependent protein kinase 2	cGMP-dependent protein kinase 2	Q13237;B7ZA25	Q13237	87.431	24.7893	15.0582	30	30	30	40.3	40.3	40.3	124.66	40	0	PRKG2
ADI1	1,2-dihydroxy-3-keto-5-methylthiopentene dioxygenase	1,2-dihydroxy-3-keto-5-methylthiopentene dioxygenase	Q9BV57;A0A0G2JQN5	Q9BV57	21.498	24.7814	NaN	10	10	10	47.5	47.5	47.5	52.326	9	0	ADI1
TTLL12	Tubulin--tyrosine ligase-like protein 12	Tubulin--tyrosine ligase-like protein 12	Q14166	Q14166	74.403	24.7725	18.304	26	26	22	49.5	49.5	42.1	179.22	27	1	TTLL12
ADSS	Adenylosuccinate synthetase isozyme 2	Adenylosuccinate synthetase isozyme 2	P30520	P30520	50.097	24.7698	16.2387	14	14	14	39.9	39.9	39.9	76.629	15	0	ADSS
C12orf57	Protein C10	Protein C10;Protein C10;Protein C10	Q99622;U3KQ85;U3KQ07;F5GXW5	Q99622;U3KQ85;U3KQ07	13.178	24.7655	NaN	7	7	7	74.6	74.6	74.6	41.5	10	0	C12orf57
PSMB1	Proteasome subunit beta type-1	Proteasome subunit beta type-1	P20618	P20618	26.489	24.7628	19.6904	12	12	12	61.8	61.8	61.8	62.388	16	1	PSMB1
ARPC3	Actin-related protein 2/3 complex subunit 3	Actin-related protein 2/3 complex subunit 3;Actin-related protein 2/3 complex subunit 3 (Fragment)	O15145;C9JZD1;F8VR50	O15145;C9JZD1	20.546	24.7562	NaN	10	10	10	43.8	43.8	43.8	45.092	9	0	ARPC3
REXO2	Oligoribonuclease, mitochondrial	Oligoribonuclease, mitochondrial;Oligoribonuclease, mitochondrial (Fragment);Oligoribonuclease, mitochondrial;Oligoribonuclease, mitochondrial	H0YG54;H0YGR4;Q9Y3B8;F5GYG5	H0YG54;H0YGR4;Q9Y3B8;F5GYG5	21.848	24.7535	NaN	7	7	7	38.3	38.3	38.3	117.59	10	0	REXO2
HSPA4	Heat shock 70 kDa protein 4	Heat shock 70 kDa protein 4;Heat shock 70 kDa protein 4;Heat shock 70 kDa protein 4	P34932;A0A087WYC1;A0A087WTS8	P34932;A0A087WYC1;A0A087WTS8	94.33	24.7487	18.1146	51	51	48	59.2	59.2	56.2	323.31	50	1	HSPA4
FKBP5	Peptidyl-prolyl cis-trans isomerase FKBP5;Peptidyl-prolyl cis-trans isomerase FKBP5, N-terminally processed	Peptidyl-prolyl cis-trans isomerase FKBP5	Q13451	Q13451	51.212	24.7429	16.3528	23	23	23	54.9	54.9	54.9	171.32	30	0	FKBP5
NUDC	Nuclear migration protein nudC	Nuclear migration protein nudC	Q9Y266;A0A0A0MSU9;A0A0A0MSS4	Q9Y266	38.242	24.7371	NaN	17	17	17	38.7	38.7	38.7	158.7	19	0	NUDC
GSN	Gelsolin	Gelsolin;Gelsolin;Gelsolin	A0A0A0MS51;A0A0A0MT01;P06396;CON__Q3SX14;Q5T0I0;A0A0U1RQL8;Q5T0H8	A0A0A0MS51;A0A0A0MT01;P06396	82.525	24.7362	NaN	26	26	26	45.3	45.3	45.3	176.37	33	0	GSN
DPY30	Protein dpy-30 homolog	Protein dpy-30 homolog	Q9C005	Q9C005	11.25	24.7332	NaN	7	7	7	90.9	90.9	90.9	22.777	6	0	DPY30
UCHL3	Ubiquitin carboxyl-terminal hydrolase isozyme L3;Ubiquitin carboxyl-terminal hydrolase	Ubiquitin carboxyl-terminal hydrolase isozyme L3;Ubiquitin carboxyl-terminal hydrolase;Ubiquitin carboxyl-terminal hydrolase isozyme L3 (Fragment)	P15374;A0A087WTB8;Q5TBK7	P15374;A0A087WTB8;Q5TBK7	26.182	24.7329	NaN	8	8	8	40.4	40.4	40.4	28.881	8	0	UCHL3
SND1	Staphylococcal nuclease domain-containing protein 1	Staphylococcal nuclease domain-containing protein 1	Q7KZF4;H7C597	Q7KZF4	102	24.7317	18.9656	53	53	53	71.3	71.3	71.3	282.38	55	6	SND1
BPNT1	3(2),5-bisphosphate nucleotidase 1	3(2),5-bisphosphate nucleotidase 1;3(2),5-bisphosphate nucleotidase 1	O95861;A6NF51;F8W1J0;F8VZG4;F8VVW8;F8VRY7	O95861;A6NF51	33.392	24.7299	NaN	22	22	22	66.2	66.2	66.2	84.93	23	0	BPNT1
PSMC3	26S protease regulatory subunit 6A	26S proteasome regulatory subunit 6A;26S proteasome regulatory subunit 6A;26S proteasome regulatory subunit 6A;26S proteasome regulatory subunit 6A (Fragment)	R4GNH3;P17980;E9PM69;E9PKD5;E9PMD8;E9PN50;E9PLG2	R4GNH3;P17980;E9PM69;E9PKD5	47.352	24.7227	NaN	19	19	19	66	66	66	281.89	21	0	PSMC3
CPNE3	Copine-3	Copine-3;Copine-3 (Fragment)	O75131;A0A087WYQ3;H0YB26;E5RHZ0;A0A087WXR6;A0A087WUS8;E5RFT7;A0A0G2JMP5	O75131;A0A087WYQ3	60.13	24.7214	16.5135	21	21	20	45.6	45.6	43.9	75.027	23	0	CPNE3
KLC1	Kinesin light chain 1	Kinesin light chain 1;Kinesin light chain 1;Kinesin light chain 1;Uncharacterized protein;Kinesin light chain 1;Kinesin light chain 1;Kinesin light chain 1	G3V5R9;G3V3H3;G3V2E7;E7EVH7;Q07866;F8W6L3;G5E9S8;H0YJU9;H0YJT3;H0YJL0;G3V2P7;H0YGB8	G3V5R9;G3V3H3;G3V2E7;E7EVH7;Q07866;F8W6L3;G5E9S8	71.407	24.7212	19.1738	63	43	27	70.6	52.9	38.6	283.38	42	3	KLC1
NUBP2	Cytosolic Fe-S cluster assembly factor NUBP2	Cytosolic Fe-S cluster assembly factor NUBP2;Cytosolic Fe-S cluster assembly factor NUBP2;Cytosolic Fe-S cluster assembly factor NUBP2;Cytosolic Fe-S cluster assembly factor NUBP2;Cytosolic Fe-S cluster assembly factor NUBP2 (Fragment)	Q9Y5Y2;H3BNF0;B7Z6P0;H3BQR2;H3BNS4;H3BRK5;H3BMW1;H3BRE1	Q9Y5Y2;H3BNF0;B7Z6P0;H3BQR2;H3BNS4	28.825	24.7199	18.3308	8	8	8	47.6	47.6	47.6	87.857	12	2	NUBP2
LRRC47	Leucine-rich repeat-containing protein 47	Leucine-rich repeat-containing protein 47	Q8N1G4;J3KRP5	Q8N1G4	63.472	24.7157	18.7404	25	25	25	50.8	50.8	50.8	84.798	24	1	LRRC47
PSMA3	Proteasome subunit alpha type-3	Proteasome subunit alpha type-3;Proteasome endopeptidase complex	P25788;G3V4X5;G3V3W4;G3V5N4;H0YJ03	P25788;G3V4X5	28.433	24.7151	19.3748	12	12	12	48.2	48.2	48.2	26.228	9	1	PSMA3
RPL14	60S ribosomal protein L14	60S ribosomal protein L14;60S ribosomal protein L14	P50914;E7EPB3	P50914;E7EPB3	23.432	24.706	NaN	8	8	8	31.2	31.2	31.2	18.446	8	0	RPL14
RPL32	60S ribosomal protein L32	60S ribosomal protein L32 (Fragment);60S ribosomal protein L32;60S ribosomal protein L32	D3YTB1;F8W727;P62910	D3YTB1;F8W727;P62910	15.616	24.7039	NaN	6	6	6	36.8	36.8	36.8	28.16	6	0	RPL32
DCD	Dermcidin;Survival-promoting peptide;DCD-1	Dermcidin	P81605	P81605	11.284	24.6999	22.2376	5	5	5	43.6	43.6	43.6	13.536	4	4	DCD
PSMC5	26S protease regulatory subunit 8	26S proteasome regulatory subunit 8;26S proteasome regulatory subunit 8 (Fragment);26S proteasome regulatory subunit 8 (Fragment);26S proteasome regulatory subunit 8 (Fragment)	P62195;J3QQM1;J3QSA9;J3KRP2;J3QLH6;J3QSE0;J3QRW1;J3QRR3;J3KTQ9	P62195;J3QQM1;J3QSA9;J3KRP2	45.626	24.6965	20.4175	31	31	30	80.5	80.5	80.5	153.34	26	0	PSMC5
SYT1	Synaptotagmin-1	Synaptotagmin I, isoform CRA_b;Synaptotagmin-1	J3KQA0;P21579;Q8N9I0;O00445;K7EJS7	J3KQA0;P21579	47.26	24.685	17.4971	12	12	12	37	37	37	58.977	19	1	SYT1
MLPH		Melanophilin (Fragment)	H7C2D8	H7C2D8	22.065	24.6844	NaN	17	6	6	77.8	18.7	18.7	24.041	6	0	MLPH
APEH	Acylamino-acid-releasing enzyme	Acylamino-acid-releasing enzyme;Acylamino-acid-releasing enzyme;Acylamino-acid-releasing enzyme (Fragment);Acylamino-acid-releasing enzyme (Fragment)	C9JIF9;P13798;H7C393;H7C1U0;C9JLK2;F8WEH5;H0YFE5	C9JIF9;P13798;H7C393;H7C1U0	81.673	24.6844	18.4701	22	22	22	41	41	41	221.57	19	1	APEH
HTATIP2	Oxidoreductase HTATIP2	Oxidoreductase HTATIP2;Oxidoreductase HTATIP2	Q9BUP3;E9PI87	Q9BUP3;E9PI87	27.049	24.6715	NaN	12	12	12	50.4	50.4	50.4	53.013	15	0	HTATIP2
RPL26	60S ribosomal protein L26;60S ribosomal protein L26-like 1	60S ribosomal protein L26 (Fragment);Uncharacterized protein;60S ribosomal protein L26;60S ribosomal protein L26;60S ribosomal protein L26-like 1 (Fragment);60S ribosomal protein L26-like 1;60S ribosomal protein L26 (Fragment);60S ribosomal protein L26	J3QRI7;J3QQQ9;J3QQV1;P61254;E5RIT6;Q9UNX3;J3QRC4;J3KSS0;E5RHH1;J3KS10	J3QRI7;J3QQQ9;J3QQV1;P61254;E5RIT6;Q9UNX3;J3QRC4;J3KSS0	12.63	24.6695	17.8869	9	9	9	61.7	61.7	61.7	14.048	8	0	RPL26
HGD	Homogentisate 1,2-dioxygenase	Homogentisate 1,2-dioxygenase	Q93099;H7C576;C9JTX9;H7C4R8;H7C5G7	Q93099	49.963	24.6647	NaN	20	20	20	63.6	63.6	63.6	87.652	16	0	HGD
GP2	Pancreatic secretory granule membrane major glycoprotein GP2	Pancreatic secretory granule membrane major glycoprotein GP2	P55259;I3L2Z7;I3L3I2	P55259	59.48	24.6543	21.6263	10	10	6	20.9	20.9	13.8	57.011	10	4	GP2
SULT2B1	Sulfotransferase family cytosolic 2B member 1	Sulfotransferase family cytosolic 2B member 1	O00204	O00204	41.307	24.6524	18.1602	18	18	18	64.9	64.9	64.9	94.148	12	1	SULT2B1
VPS4A	Vacuolar protein sorting-associated protein 4A	Vacuolar protein sorting-associated protein 4A;Uncharacterized protein (Fragment)	Q9UN37;I3L4J1	Q9UN37;I3L4J1	48.897	24.6493	17.2585	22	13	13	43.2	30.2	30.2	27.084	14	0	VPS4A
TLN1	Talin-1	Talin-1	Q9Y490	Q9Y490	269.76	24.6453	14.285	134	134	123	65.4	65.4	61.1	323.31	142	1	TLN1
RAB8A	Ras-related protein Rab-8A	Ras-related protein Rab-8A	P61006	P61006	23.668	24.6419	NaN	14	10	10	57.5	41.1	41.1	70.595	14	0	RAB8A
PBDC1	Protein PBDC1	Protein PBDC1;Protein PBDC1	Q9BVG4;A6NDF3	Q9BVG4;A6NDF3	26.056	24.6366	NaN	10	10	10	40.3	40.3	40.3	54.809	15	0	PBDC1
PCBP2	Poly(rC)-binding protein 2	Poly(rC)-binding protein 2;Poly(rC)-binding protein 2;Poly(rC)-binding protein 2 (Fragment);Poly(rC)-binding protein 2 (Fragment)	F8VZX2;Q15366;H3BRU6;F8W0G4;F8VXH9;F8W1G6;J3QT27;E9PFP8;P57721;F8VRH0;H3BSS4;H3BND9	F8VZX2;Q15366;H3BRU6;F8W0G4	33.8	24.6326	16.8628	17	10	10	74.5	56.1	56.1	71.638	9	1	PCBP2
PRKAR1A	cAMP-dependent protein kinase type I-alpha regulatory subunit;cAMP-dependent protein kinase type I-alpha regulatory subunit, N-terminally processed	cAMP-dependent protein kinase type I-alpha regulatory subunit;cAMP-dependent protein kinase type I-alpha regulatory subunit (Fragment);cAMP-dependent protein kinase type I-alpha regulatory subunit (Fragment);cAMP-dependent protein kinase type I-alpha regul	P10644;K7EPB2;K7EIE5;K7EID3;K7EJ40;K7EK41;K7EMZ6;K7EMU2;K7EM13;K7EQK3;X6RAV4;K7EPR5	P10644;K7EPB2;K7EIE5;K7EID3;K7EJ40;K7EK41	42.981	24.6305	NaN	18	18	14	52.2	52.2	45.7	49.736	17	0	PRKAR1A
SMPDL3B	Acid sphingomyelinase-like phosphodiesterase 3b	Acid sphingomyelinase-like phosphodiesterase 3b;Acid sphingomyelinase-like phosphodiesterase 3b;Acid sphingomyelinase-like phosphodiesterase 3b (Fragment)	Q92485;F8VWW8;Q5T0Y8	Q92485;F8VWW8;Q5T0Y8	50.813	24.6268	18.1412	12	12	12	37.6	37.6	37.6	62.852	17	0	SMPDL3B
PPA1	Inorganic pyrophosphatase	Inorganic pyrophosphatase;Inorganic pyrophosphatase	Q15181;Q5SQT6	Q15181;Q5SQT6	32.66	24.6226	19.2761	12	12	12	64.4	64.4	64.4	51.971	13	2	PPA1
PPP2R4	Serine/threonine-protein phosphatase 2A activator	Serine/threonine-protein phosphatase 2A activator;Serine/threonine-protein phosphatase 2A activator (Fragment);Serine/threonine-protein phosphatase 2A activator (Fragment)	Q15257;Q5T949;Q5T948	Q15257;Q5T949;Q5T948	40.667	24.6161	18.088	12	12	0	48.9	48.9	0	69.958	13	1	PPP2R4
GCLC	Glutamate--cysteine ligase catalytic subunit	Glutamate--cysteine ligase catalytic subunit;Glutamate--cysteine ligase catalytic subunit;Glutamate--cysteine ligase catalytic subunit (Fragment);Glutamate--cysteine ligase catalytic subunit;Glutamate--cysteine ligase catalytic subunit	P48506;B4E2I4;A0A2R8YEL6;E1CEI4;A0A0C4DGB2;A0A2R8Y648;D6RGF8	P48506;B4E2I4;A0A2R8YEL6;E1CEI4;A0A0C4DGB2	72.765	24.6157	17.716	31	31	31	50.7	50.7	50.7	115.66	30	2	GCLC
IQGAP1	Ras GTPase-activating-like protein IQGAP1	Ras GTPase-activating-like protein IQGAP1;Ras GTPase-activating-like protein IQGAP1;Ras GTPase-activating-like protein IQGAP1	P46940;H0YLE8;A0A0J9YXZ5;A0A087WWP1;A0A087X225;H0YKA5	P46940;H0YLE8;A0A0J9YXZ5	189.25	24.6118	15.944	64	64	64	45.1	45.1	45.1	323.31	72	3	IQGAP1
PIP4K2C	Phosphatidylinositol 5-phosphate 4-kinase type-2 gamma	Phosphatidylinositol 5-phosphate 4-kinase type-2 gamma	Q8TBX8;F8VNT5;F8VU68;H0YIJ6	Q8TBX8	47.299	24.6035	16.9573	24	24	24	60.1	60.1	60.1	124.05	25	1	PIP4K2C
KRT18	Keratin, type I cytoskeletal 18	Keratin, type I cytoskeletal 18;Keratin, type I cytoskeletal 18	P05783;F8VZY9;CON__P05784;CON__H-INV:HIT000015463	P05783;F8VZY9	48.057	24.603	NaN	32	31	30	82.1	82.1	80	190.71	18	0	KRT18
CCT4	T-complex protein 1 subunit delta	T-complex protein 1 subunit delta	P50991	P50991	57.924	24.5969	19.0525	32	32	32	61.2	61.2	61.2	215.82	30	1	CCT4
SPR	Sepiapterin reductase	Sepiapterin reductase	P35270	P35270	28.048	24.5907	NaN	16	16	16	68.2	68.2	68.2	96.932	18	0	SPR
PITPNA	Phosphatidylinositol transfer protein alpha isoform	Phosphatidylinositol transfer protein alpha isoform;Phosphatidylinositol transfer protein alpha isoform;Phosphatidylinositol transfer protein alpha isoform (Fragment);Phosphatidylinositol transfer protein alpha isoform (Fragment);Phosphatidylinositol trans	F5GWE5;Q00169;I3L459;I3L4C0;I3L4H1;I3L2X8;I3L471;I3L4U7;I3NI10;I3L3W1	F5GWE5;Q00169;I3L459;I3L4C0;I3L4H1	31.802	24.5885	18.7307	15	15	14	70.7	70.7	70.7	45.337	22	0	PITPNA
PSMB2	Proteasome subunit beta type-2	Proteasome subunit beta type-2	P49721;A0A087WVV1	P49721	22.836	24.5874	19.2467	5	5	5	39.3	39.3	39.3	21.835	6	1	PSMB2
PSAT1	Phosphoserine aminotransferase	Phosphoserine aminotransferase	Q9Y617	Q9Y617	40.422	24.5857	18.8123	21	21	21	50.3	50.3	50.3	98.025	21	0	PSAT1
PSMC6	26S protease regulatory subunit 10B	26S proteasome regulatory subunit 10B;26S proteasome regulatory subunit 10B;26S proteasome regulatory subunit 10B (Fragment)	A0A087X2I1;P62333;H0YJC0;H0YJS8;H0YJT1;H0YJE9;H0YJX2;H0YJD2;H0YJY8	A0A087X2I1;P62333;H0YJC0	45.796	24.5808	NaN	29	29	29	69.7	69.7	69.7	107.97	18	0	PSMC6
ADAM9	Disintegrin and metalloproteinase domain-containing protein 9	Disintegrin and metalloproteinase domain-containing protein 9;ADAM9 protein;Disintegrin and metalloproteinase domain-containing protein 9	Q13443;A0AVL1;F8WC54;A0A0J9YY58	Q13443;A0AVL1;F8WC54	90.555	24.5773	23.1472	36	36	36	38.5	38.5	38.5	239.86	33	18	ADAM9
EIF4H	Eukaryotic translation initiation factor 4H	Eukaryotic translation initiation factor 4H	Q15056	Q15056	27.385	24.572	NaN	9	9	9	46.4	46.4	46.4	78.908	7	0	EIF4H
RBBP9	Putative hydrolase RBBP9	Putative hydrolase RBBP9	O75884	O75884	21	24.5678	17.9187	8	8	8	61.3	61.3	61.3	26.408	7	0	RBBP9
SNX9	Sorting nexin-9	Sorting nexin-9	Q9Y5X1	Q9Y5X1	66.591	24.5615	17.8055	18	18	18	42.5	42.5	42.5	165.39	16	1	SNX9
WARS	Tryptophan--tRNA ligase, cytoplasmic;T1-TrpRS;T2-TrpRS	Tryptophan--tRNA ligase, cytoplasmic	P23381;G3V3P2;G3V227;G3V277;H0YJP3;G3V3X0;G3V2Y7;G3V423;G3V5U1;G3V456;G3V3H8;G3V3Y5;G3V5W1;G3V3S7;G3V2F2;G3V3R3;G3V4S4;G3V313;G3V339;G3V2C0;G3V4C7;G3V4N8;G3V5H5;P78534;G3V4A3;G3V4Q0;G3V4N0	P23381	53.165	24.5612	NaN	20	20	20	48.2	48.2	48.2	79.697	24	0	WARS
FN3KRP	Ketosamine-3-kinase	Ketosamine-3-kinase;Ketosamine-3-kinase;Ketosamine-3-kinase (Fragment);Ketosamine-3-kinase	I3L139;Q9HA64;I3L3W5;I3L407;I3L2G3	I3L139;Q9HA64;I3L3W5;I3L407	15.642	24.5501	NaN	12	12	12	63.4	63.4	63.4	22.85	13	0	FN3KRP
RPL18	60S ribosomal protein L18	60S ribosomal protein L18 (Fragment);60S ribosomal protein L18;60S ribosomal protein L18 (Fragment);60S ribosomal protein L18;60S ribosomal protein L18 (Fragment)	J3QQ67;Q07020;F8VUA6;G3V203;H0YHA7;F8VYV2;A0A075B7A0;F8VXR6	J3QQ67;Q07020;F8VUA6;G3V203;H0YHA7	21.728	24.549	19.7901	10	10	10	38.9	38.9	38.9	32.523	6	0	RPL18
NSF	Vesicle-fusing ATPase	Vesicle-fusing ATPase;Vesicle-fusing ATPase	I3L0N3;P46459;I3L2G1;I3L0L3;K7EQD6;I3L4Q9;I3L338	I3L0N3;P46459	82.091	24.5445	17.9109	46	46	46	61.3	61.3	61.3	214	50	0	NSF
SNX1	Sorting nexin-1	Sorting nexin-1;Sorting nexin-1	Q13596;H0YK42;H0YKT3;H0YK43	Q13596;H0YK42	59.069	24.5441	17.8072	21	20	20	40.6	38.7	38.7	66.55	19	0	SNX1
KIAA1522	Uncharacterized protein KIAA1522	Uncharacterized protein KIAA1522	Q9P206	Q9P206	107.09	24.5421	NaN	34	34	34	49.2	49.2	49.2	121.19	33	0	KIAA1522
RPS7	40S ribosomal protein S7	40S ribosomal protein S7;40S ribosomal protein S7	P62081;B5MCP9;A0A2R8Y623	P62081;B5MCP9	22.127	24.5372	18.8505	12	12	12	42.8	42.8	42.8	43.381	10	1	RPS7
GNAQ	Guanine nucleotide-binding protein G(q) subunit alpha	Guanine nucleotide-binding protein G(q) subunit alpha	P50148;B1AM21	P50148	42.142	24.533	15.7673	15	15	10	45.1	45.1	33.4	79.145	16	0	GNAQ
NAP1L1	Nucleosome assembly protein 1-like 1	Nucleosome assembly protein 1-like 1;cDNA FLJ58569, highly similar to Nucleosome assembly protein 1-like 1;Nucleosome assembly protein 1-like 1 (Fragment);Nucleosome assembly protein 1-like 1;Nucleosome assembly protein 1-like 1;Nucleosome assembly protein	F8VV59;B7Z9C2;F8VY35;F8W0J6;F5H4R6;H0YIV4;P55209;F8W118;F8VUX1;F8W543;H0YHC3;F8W020;F8VRJ2;H0YH88;F8VXI6;F8VVB5;B7Z4K9	F8VV59;B7Z9C2;F8VY35;F8W0J6;F5H4R6;H0YIV4;P55209;F8W118;F8VUX1;F8W543;H0YHC3;F8W020;F8VRJ2;H0YH88;F8VXI6	38.028	24.5317	NaN	11	9	9	37.6	34.3	34.3	87.938	7	0	NAP1L1
CCS	Copper chaperone for superoxide dismutase	Copper chaperone for superoxide dismutase;Copper chaperone for superoxide dismutase	J3KNF4;O14618;E9PP76;E9PK03	J3KNF4;O14618	27.086	24.5287	NaN	9	9	9	40	40	40	50.373	9	0	CCS
RPS23	40S ribosomal protein S23	40S ribosomal protein S23;40S ribosomal protein S23;40S ribosomal protein S23;40S ribosomal protein S23;40S ribosomal protein S23	P62266;D6RD47;D6RDJ2;D6RIX0;D6R9I7	P62266;D6RD47;D6RDJ2;D6RIX0;D6R9I7	15.807	24.528	16.2123	9	9	9	39.2	39.2	39.2	20.4	7	0	RPS23
TUBB2A	Tubulin beta-2A chain	Tubulin beta-2A chain	Q13885	Q13885	49.906	24.5273	17.9038	35	7	1	73	25.2	3.6	45.191	11	1	TUBB2A
RPL5	60S ribosomal protein L5	60S ribosomal protein L5;60S ribosomal protein L5 (Fragment);60S ribosomal protein L5 (Fragment)	P46777;A0A2R8Y6J3;Q5T7N0;A0A2R8Y4A2;R4GNJ2	P46777;A0A2R8Y6J3;Q5T7N0	34.362	24.5246	NaN	17	17	17	51.2	51.2	51.2	109.37	13	0	RPL5
ARRB1	Beta-arrestin-1	Beta-arrestin-1;Beta-arrestin-1 (Fragment)	P49407;E9PM35;H0YET9	P49407;E9PM35	47.065	24.517	NaN	19	19	19	53.1	53.1	53.1	72.06	14	0	ARRB1
TMEM30A	Cell cycle control protein 50A	Cell cycle control protein 50A	Q9NV96	Q9NV96	40.683	24.5057	17.3954	8	8	7	24.7	24.7	22.4	28.04	11	0	TMEM30A
UBL5	Ubiquitin-like protein 5	Ubiquitin-like protein 5	Q9BZL1;K7EQ43	Q9BZL1	8.5468	24.5038	19.3941	4	4	4	53.4	53.4	53.4	14.778	6	0	UBL5
CAMK2D	Calcium/calmodulin-dependent protein kinase type II subunit delta	Calcium/calmodulin-dependent protein kinase (CaM kinase) II delta, isoform CRA_e;Calcium/calmodulin-dependent protein kinase type II subunit delta;Calcium/calmodulin-dependent protein kinase type II subunit delta;Calcium/calmodulin-dependent protein kinase	D6R938;E9PBG7;E9PF82;Q13557;H0Y9C2;H0Y9J2;Q9UQM7	D6R938;E9PBG7;E9PF82;Q13557	56.298	24.5015	19.7144	23	23	15	49.8	49.8	39	127.41	17	4	CAMK2D
DNAJC5	DnaJ homolog subfamily C member 5	DnaJ homolog subfamily C member 5	Q9H3Z4	Q9H3Z4	22.149	24.4972	18.4989	3	3	3	30.3	30.3	30.3	29.578	7	0	DNAJC5
TWF1	Twinfilin-1	Twinfilin-1;Twinfilin-1 (Fragment)	Q12792;F8VS81;F8VRG3;F8W1Q9;F8W645	Q12792;F8VS81	40.282	24.4873	16.676	15	15	12	46.9	46.9	40.9	138.27	11	1	TWF1
CSNK2A1	Casein kinase II subunit alpha;Casein kinase II subunit alpha 3	Casein kinase II subunit alpha;Casein kinase II subunit alpha;Casein kinase II subunit alpha;Casein kinase II subunit alpha;Casein kinase II subunit alpha 3;Casein kinase II subunit alpha;Casein kinase II subunit alpha;Casein kinase II subunit alpha;Casein	A0A2R8YD58;E7EU96;P68400;A0A2R8Y5A0;Q8NEV1;A0A2R8YF43;A0A2R8YFU2;A0A2R8YDP2;A0A2R8Y4D6;A0A2R8Y4H0;A0A087WY74;A0A2R8YDY7;V9GYA2;V9GYW6;A0A2R8YEW1;A0A2R8Y3W6;A0A2R8Y797;A0A2R8YEL7;V9GY80;A0A2R8YF47;A0A2R8YCK2;A0A2R8Y7T1	A0A2R8YD58;E7EU96;P68400;A0A2R8Y5A0;Q8NEV1;A0A2R8YF43;A0A2R8YFU2;A0A2R8YDP2;A0A2R8Y4D6;A0A2R8Y4H0	44.418	24.4836	NaN	14	14	14	52.7	52.7	52.7	60.639	20	0	CSNK2A1
WASF2	Wiskott-Aldrich syndrome protein family member 2	Wiskott-Aldrich syndrome protein family member 2	Q9Y6W5	Q9Y6W5	54.283	24.4828	NaN	17	17	15	33.7	33.7	30.7	98.525	15	0	WASF2
RALA	Ras-related protein Ral-A	Ras-related protein Ral-A;Ras-related protein Ral-A (Fragment);Ras-related protein Ral-A (Fragment)	P11233;C9JPE8;H7C3P7	P11233;C9JPE8;H7C3P7	23.567	24.4743	NaN	18	6	6	63.6	27.7	27.7	12.814	4	0	RALA
PSMD4	26S proteasome non-ATPase regulatory subunit 4	26S proteasome non-ATPase regulatory subunit 4;26S proteasome non-ATPase regulatory subunit 4;26S proteasome non-ATPase regulatory subunit 4 (Fragment)	Q5VWC4;P55036;A6PVX3;H0Y3Y9;H0Y561	Q5VWC4;P55036;A6PVX3	41.079	24.4682	NaN	9	9	8	34.2	34.2	31.3	60.177	7	0	PSMD4
IMPA1	Inositol monophosphatase 1	Inositol monophosphatase 1;Inositol-1-monophosphatase (Fragment);Inositol monophosphatase 1 (Fragment);Inositol-1-monophosphatase (Fragment)	P29218;H0YBL1;E5RG13;E5RIP7;E5RI82;E5RG94;E5RIF4;E5RHE9;E5RGY4	P29218;H0YBL1;E5RG13;E5RIP7	30.188	24.4681	NaN	11	11	11	52.3	52.3	52.3	33.428	13	0	IMPA1
PAFAH1B1	Platelet-activating factor acetylhydrolase IB subunit alpha	Platelet-activating factor acetylhydrolase IB subunit alpha;Platelet-activating factor acetylhydrolase IB subunit alpha (Fragment)	P43034;I3L3N5;I3L495	P43034;I3L3N5	46.637	24.464	18.7943	19	19	19	50	50	50	77.077	21	1	PAFAH1B1
GMPPA	Mannose-1-phosphate guanyltransferase alpha	Mannose-1-phosphate guanyltransferase alpha;Mannose-1-phosphate guanyltransferase alpha	Q96IJ6;A0A087WUI8;A0A0U1RRC2;F8WD54;C9J255;C9JAH0	Q96IJ6;A0A087WUI8	46.291	24.4607	17.7996	21	21	21	48.6	48.6	48.6	97.947	16	1	GMPPA
RAB3A	Ras-related protein Rab-3A	Ras-related protein Rab-3A;Ras-related protein Rab-3A (Fragment)	P20336;M0R257;S4R3Q3	P20336;M0R257	24.984	24.458	18.1362	13	6	6	61.8	41.8	41.8	42.812	4	1	RAB3A
RPL37A	60S ribosomal protein L37a	60S ribosomal protein L37a;60S ribosomal protein L37a;60S ribosomal protein L37a;60S ribosomal protein L37a;60S ribosomal protein L37a;60S ribosomal protein L37a	C9J4Z3;P61513;M0R0A1;Q6P4E4;E9PEL3;M0R2L6;G5E9R3;A6NKH3	C9J4Z3;P61513;M0R0A1;Q6P4E4;E9PEL3;M0R2L6	7.624	24.4532	20.4526	6	6	6	80.9	80.9	80.9	43.549	5	0	RPL37A
PTGR2	Prostaglandin reductase 2	Prostaglandin reductase 2;Uncharacterized protein;Prostaglandin reductase 2	Q8N8N7;G3V3Y1;G3V2R9	Q8N8N7;G3V3Y1;G3V2R9	38.499	24.4437	NaN	10	10	10	48.1	48.1	48.1	38.894	7	0	PTGR2
PDAP1	28 kDa heat- and acid-stable phosphoprotein	28 kDa heat- and acid-stable phosphoprotein	Q13442;F8WBW6	Q13442	20.63	24.4393	NaN	9	9	9	39.2	39.2	39.2	32.429	11	0	PDAP1
SLK	STE20-like serine/threonine-protein kinase	STE20-like serine/threonine-protein kinase	Q9H2G2	Q9H2G2	142.69	24.4386	15.3793	53	53	52	42.2	42.2	41.5	178.64	61	0	SLK
PACSIN3	Protein kinase C and casein kinase substrate in neurons protein 3	Protein kinase C and casein kinase substrate in neurons protein 3;Protein kinase C and casein kinase substrate in neurons protein 3 (Fragment);Protein kinase C and casein kinase substrate in neurons protein 3	Q9UKS6;A0A0C4DGG1;E9PIY1;E9PJ75;E9PNM9;E9PJ33;H0YDM6	Q9UKS6;A0A0C4DGG1;E9PIY1	48.486	24.4376	20.1267	24	24	24	61.1	61.1	61.1	261.97	22	2	PACSIN3
LRRC57	Leucine-rich repeat-containing protein 57	Leucine-rich repeat-containing protein 57;Uncharacterized protein;Leucine-rich repeat-containing protein 57 (Fragment)	Q8N9N7;A0A3B3ISV5;H3BSW0	Q8N9N7;A0A3B3ISV5;H3BSW0	26.754	24.4366	16.9875	14	14	14	72.4	72.4	72.4	66.364	14	0	LRRC57
RHEB	GTP-binding protein Rheb	GTP-binding protein Rheb;GTP-binding protein Rheb	C9J931;Q15382;C9J469	C9J931;Q15382	8.6739	24.4341	NaN	5	5	5	79.7	79.7	79.7	21.887	6	0	RHEB
PSMB7	Proteasome subunit beta type-7	Proteasome subunit beta type-7	Q99436;Q5TBG5	Q99436	29.965	24.4331	18.2701	6	6	6	36.1	36.1	36.1	83.099	9	0	PSMB7
FAM114A1	Protein NOXP20	Protein NOXP20	Q8IWE2	Q8IWE2	60.741	24.4286	NaN	16	16	16	36.2	36.2	36.2	78.481	17	0	FAM114A1
SYAP1	Synapse-associated protein 1	Synapse-associated protein 1	Q96A49	Q96A49	39.933	24.4269	NaN	12	12	12	31.2	31.2	31.2	80.234	10	0	SYAP1
PABPC1	Polyadenylate-binding protein 1;Polyadenylate-binding protein	Polyadenylate-binding protein 1;Polyadenylate-binding protein;Polyadenylate-binding protein;Polyadenylate-binding protein;Polyadenylate-binding protein 1 (Fragment)	P11940;E7EQV3;A0A087WTT1;E7ERJ7;H0YAR2;Q9H361;H0YAP2;E5RGH3;H0YB86;E5RJB9;H0YBN4;E5RH24;B1ANR1;H0YAS6;H0YB75;E5RHG7;H0YEQ8;Q4VXU2;H0YC10;H0YAS7;H0YAW6;E5RJM8;E5RGC4;E5RFD8;Q96DU9	P11940;E7EQV3;A0A087WTT1;E7ERJ7;H0YAR2	70.67	24.4209	14.8842	35	35	27	52.4	52.4	42.9	134.17	32	0	PABPC1
CRABP2	Cellular retinoic acid-binding protein 2	Cellular retinoic acid-binding protein 2;Cellular retinoic acid-binding protein 2 (Fragment)	P29373;Q5SYZ4	P29373;Q5SYZ4	15.693	24.417	NaN	16	16	16	76.1	76.1	76.1	92.898	10	0	CRABP2
LTA4H	Leukotriene A-4 hydrolase	Leukotriene A-4 hydrolase	P09960;B4DEH5	P09960	69.284	24.4164	18.4931	21	21	21	46.2	46.2	46.2	296.39	23	1	LTA4H
ACY1	Aminoacylase-1	Aminoacylase-1;Aminoacylase-1;ABHD14A-ACY1 readthrough (Fragment);ABHD14A-ACY1 readthrough;ABHD14A-ACY1 readthrough (Fragment)	Q03154;A0A1B0GU86;A0A1B0GW23;C9JMV9;A0A1B0GV31;A0A1B0GVA5;C9JYZ0;F8WC59;A0A1B0GTG3;A0A1B0GVZ3;A0A1B0GVG0;A0A1B0GU36	Q03154;A0A1B0GU86;A0A1B0GW23;C9JMV9;A0A1B0GV31	45.884	24.4108	NaN	21	21	21	66.2	66.2	66.2	61.799	17	0	ACY1
ATP6V1F	V-type proton ATPase subunit F	V-type proton ATPase subunit F	Q16864	Q16864	13.37	24.4032	NaN	4	4	4	52.9	52.9	52.9	53.427	6	0	ATP6V1F
TALDO1	Transaldolase	Transaldolase;Transaldolase	P37837;F2Z393	P37837;F2Z393	37.54	24.3996	14.688	17	17	17	45.7	45.7	45.7	32.755	12	0	TALDO1
PSMC2	26S protease regulatory subunit 7	26S proteasome regulatory subunit 7;26S proteasome regulatory subunit 7	P35998;A0A1W2PQS1;C9JLS9	P35998;A0A1W2PQS1	48.633	24.3962	14.908	22	22	22	65.8	65.8	65.8	202.44	22	0	PSMC2
APPL1	DCC-interacting protein 13-alpha	DCC-interacting protein 13-alpha	Q9UKG1;C9JAB0;C9K0C4	Q9UKG1	79.663	24.3926	16.1736	33	32	32	62.3	61.4	61.4	228.45	30	0	APPL1
RHOB	Rho-related GTP-binding protein RhoB	Rho-related GTP-binding protein RhoB	P62745	P62745	22.123	24.3894	NaN	11	9	9	54.1	40.8	40.8	16.476	10	0	RHOB
UGP2	UTP--glucose-1-phosphate uridylyltransferase	UTP--glucose-1-phosphate uridylyltransferase;UTP--glucose-1-phosphate uridylyltransferase;UTP--glucose-1-phosphate uridylyltransferase	A0A087WYS1;E7EUC7;Q16851;C9JQU9	A0A087WYS1;E7EUC7;Q16851	56.967	24.3875	NaN	27	27	13	55.3	55.3	26.2	132.23	22	0	UGP2
RPS16	40S ribosomal protein S16	40S ribosomal protein S16;40S ribosomal protein S16;40S ribosomal protein S16;40S ribosomal protein S16 (Fragment)	M0R210;P62249;M0R3H0;M0R1M5;M0QX76;Q6IPX4	M0R210;P62249;M0R3H0;M0R1M5	14.419	24.3762	NaN	11	11	11	60.5	60.5	60.5	21.885	7	0	RPS16
PSMB4	Proteasome subunit beta type-4	Proteasome subunit beta type-4	P28070	P28070	29.204	24.373	NaN	5	5	5	35.6	35.6	35.6	42.243	7	0	PSMB4
GART	Trifunctional purine biosynthetic protein adenosine-3;Phosphoribosylamine--glycine ligase;Phosphoribosylformylglycinamidine cyclo-ligase;Phosphoribosylglycinamide formyltransferase	Trifunctional purine biosynthetic protein adenosine-3;Trifunctional purine biosynthetic protein adenosine-3;Trifunctional purine biosynthetic protein adenosine-3 (Fragment);Trifunctional purine biosynthetic protein adenosine-3 (Fragment)	P22102;F8WD69;C9JBJ1;C9JTV6;C9JZG2;C9JKQ7;H7C366;A0A140TA71	P22102;F8WD69;C9JBJ1;C9JTV6	107.77	24.3729	17.1038	27	27	27	36.9	36.9	36.9	129.76	25	0	GART
RPE	Ribulose-phosphate 3-epimerase	Ribulose-phosphate 3-epimerase;Ribulose-phosphate 3-epimerase (Fragment);Ribulose-5-phosphate-3-epimerase, isoform CRA_a;Ribulose-phosphate 3-epimerase	Q96AT9;C9J6A7;C9J9T0;C9IZU8;C9IYE8;C9J8S0;Q2QD12;C9JCL8;E7ESZ6;F8WBT4	Q96AT9;C9J6A7;C9J9T0;C9IZU8	24.927	24.3687	NaN	8	8	8	61.8	61.8	61.8	51.784	6	0	RPE
RPL24	60S ribosomal protein L24	60S ribosomal protein L24;60S ribosomal protein L24;60S ribosomal protein L24	P83731;C9JXB8;C9JNW5	P83731;C9JXB8;C9JNW5	17.779	24.3665	NaN	10	10	10	40.1	40.1	40.1	27.116	9	0	RPL24
SH3GLB2	Endophilin-B2	Endophilin-B2;Endophilin-B2;Endophilin-B2	B7ZC38;Q9NR46;B7ZC39;F8WFB9;G5E9J1;H7C1Z6	B7ZC38;Q9NR46;B7ZC39	44.361	24.3577	NaN	16	16	16	48.2	48.2	48.2	46.186	16	0	SH3GLB2
DPP3	Dipeptidyl peptidase 3	Dipeptidyl peptidase 3;Dipeptidyl peptidase 3;Dipeptidyl peptidase 3;Dipeptidyl peptidase 3 (Fragment)	G3V1D3;G3V180;Q9NY33;E9PQ14;E9PPK9;E9PKK8;E9PNX5;E9PQF2	G3V1D3;G3V180;Q9NY33;E9PQ14	84.304	24.3513	NaN	26	26	26	46.3	46.3	46.3	143.04	19	0	DPP3
RPL4	60S ribosomal protein L4	60S ribosomal protein L4;60S ribosomal protein L4;60S ribosomal protein L4 (Fragment)	P36578;H3BM89;H3BU31;H3BTP7	P36578;H3BM89;H3BU31	47.697	24.3479	NaN	14	14	14	34	34	34	38.908	11	0	RPL4
EEF1D	Elongation factor 1-delta	Elongation factor 1-delta (Fragment);Elongation factor 1-delta;Elongation factor 1-delta;Elongation factor 1-delta;Elongation factor 1-delta (Fragment);Elongation factor 1-delta (Fragment);Elongation factor 1-delta (Fragment);Elongation factor 1-delta (Fra	E9PK01;P29692;A0A087X1X7;E9PRY8;E9PPR1;E9PL12;E9PQ49;E9PI39;E9PMW7;E9PIZ1;H0YCK7;E9PQZ1;E9PK06;E9PKK3;E9PK72;H0YE58;H0YE72;E9PNW6;E9PQC9;E9PJD0	E9PK01;P29692;A0A087X1X7;E9PRY8;E9PPR1;E9PL12;E9PQ49;E9PI39;E9PMW7;E9PIZ1;H0YCK7;E9PQZ1	28.821	24.3477	18.1435	14	14	4	58.6	58.6	26.8	174.38	13	0	EEF1D
GFPT1	Glutamine--fructose-6-phosphate aminotransferase [isomerizing] 1	Glutamine--fructose-6-phosphate aminotransferase [isomerizing] 1	Q06210;E5RJP4	Q06210	78.806	24.3469	16.0285	38	38	33	63.5	63.5	55.7	263.64	39	0	GFPT1
NUDCD2	NudC domain-containing protein 2	NudC domain-containing protein 2;NudC domain-containing protein 2	Q8WVJ2;E5RFP0	Q8WVJ2;E5RFP0	17.676	24.3403	NaN	7	7	7	47.8	47.8	47.8	32.881	7	0	NUDCD2
CCDC53	WASH complex subunit CCDC53	WASH complex subunit 3;WASH complex subunit 3;WASH complex subunit 3;WASH complex subunit 3;WASH complex subunit 3;WASH complex subunit 3;WASH complex subunit 3	F5GWI9;F5GXZ7;F5GZ97;Q9Y3C0;F5H0A7;F5GXZ4;F5H2P1;H0YGN0	F5GWI9;F5GXZ7;F5GZ97;Q9Y3C0;F5H0A7;F5GXZ4;F5H2P1	18.534	24.3352	NaN	6	6	6	42.6	42.6	42.6	37.787	5	0	CCDC53
P2RX4	P2X purinoceptor;P2X purinoceptor 4	P2X purinoceptor 4;P2X purinoceptor 4	F6SFZ6;Q99571;F5H1M6	F6SFZ6;Q99571	37.979	24.3312	18.9131	7	7	7	25.2	25.2	25.2	34.038	5	0	P2RX4
SH3GL1	Endophilin-A2	Endophilin-A2;Endophilin-A2 (Fragment);Endophilin-A2 (Fragment)	Q99961;M0QYE0;M0R0I3;M0R2K6;Q99962	Q99961;M0QYE0;M0R0I3	41.489	24.3306	NaN	14	14	14	37.8	37.8	37.8	43.587	12	0	SH3GL1
RPL13	60S ribosomal protein L13	60S ribosomal protein L13;60S ribosomal protein L13 (Fragment)	P26373;J3QSB4;H3BUK8;H3BTH3;J3KS98	P26373;J3QSB4	24.261	24.3301	16.5231	11	11	11	47.9	47.9	47.9	36.854	8	0	RPL13
ASRGL1	Isoaspartyl peptidase/L-asparaginase;Isoaspartyl peptidase/L-asparaginase alpha chain;Isoaspartyl peptidase/L-asparaginase beta chain	Isoaspartyl peptidase/L-asparaginase	Q7L266;A0A087WUG3;A0A087WZI5;E9PJK6	Q7L266	32.054	24.3288	NaN	15	15	15	60.7	60.7	60.7	97.248	9	0	ASRGL1
DNAJA2	DnaJ homolog subfamily A member 2	DnaJ homolog subfamily A member 2	O60884;A0A087WT48	O60884	45.745	24.3282	NaN	12	12	12	38.6	38.6	38.6	92.84	12	0	DNAJA2
STAT3	Signal transducer and activator of transcription 3;Signal transducer and activator of transcription	Signal transducer and activator of transcription 3;Signal transducer and activator of transcription	P40763;G8JLH9;K7EP08	P40763;G8JLH9	88.067	24.324	16.3078	41	41	41	58.8	58.8	58.8	282.83	40	1	STAT3
GPRC5B	G-protein coupled receptor family C group 5 member B	G-protein coupled receptor family C group 5 member B	Q9NZH0	Q9NZH0	44.794	24.3204	22.3808	5	5	5	14.9	14.9	14.9	29.997	4	4	GPRC5B
HS1BP3	HCLS1-binding protein 3	HCLS1-binding protein 3;HCLS1-binding protein 3;HCLS1-binding protein 3	Q53T59;B5MC96;F6TR53;H7C0Y9;F8WDN8;H7BZZ1;A0A0D9SFN1	Q53T59;B5MC96;F6TR53	42.78	24.319	NaN	14	14	14	24.7	24.7	24.7	149.72	11	0	HS1BP3
MCTS1	Malignant T-cell-amplified sequence 1	Malignant T-cell-amplified sequence 1;Malignant T cell-amplified sequence 2, pseudogene	Q9ULC4;A0A3B3IRV3	Q9ULC4;A0A3B3IRV3	20.555	24.3175	NaN	12	12	12	82.3	82.3	82.3	80.498	14	0	MCTS1
PSMC4	26S protease regulatory subunit 6B	26S proteasome regulatory subunit 6B	P43686	P43686	47.366	24.3162	15.6623	21	21	21	61.5	61.5	61.5	118.13	20	1	PSMC4
CLTC	Clathrin heavy chain 1;Clathrin heavy chain	Clathrin heavy chain 1;Clathrin heavy chain	Q00610;A0A087WVQ6;J3KS13;A0A087WX41;P53675;K7EJJ5;J3KSQ2;J3KRF5;J3QL20;F5H5N6	Q00610;A0A087WVQ6	191.61	24.3146	18.5127	86	86	86	51.5	51.5	51.5	323.31	66	4	CLTC
MPP5	MAGUK p55 subfamily member 5	MAGUK p55 subfamily member 5	Q8N3R9;G3V2B0;G3V2H1	Q8N3R9	77.293	24.3111	16.3131	31	31	31	52.3	52.3	52.3	123.19	33	1	MPP5
METAP1	Methionine aminopeptidase 1	Methionine aminopeptidase 1	P53582;H0Y955;H0Y903;H0Y9L0;D6RF24;H0YAI3	P53582	43.215	24.3084	14.8848	20	20	20	67.6	67.6	67.6	111.41	17	0	METAP1
LXN	Latexin	Latexin	Q9BS40	Q9BS40	25.75	24.3072	NaN	5	5	5	23	23	23	24.734	5	0	LXN
RPL18A	60S ribosomal protein L18a	60S ribosomal protein L18a;60S ribosomal protein L18a;60S ribosomal protein L18a;60S ribosomal protein L18a;60S ribosomal protein L18a (Fragment)	M0R117;Q02543;M0R1A7;M0R0P7;M0R3D6	M0R117;Q02543;M0R1A7;M0R0P7;M0R3D6	18.079	24.3067	NaN	13	13	13	64.3	64.3	64.3	56.37	10	0	RPL18A
TAOK3	Serine/threonine-protein kinase TAO3	Serine/threonine-protein kinase TAO3;Serine/threonine-protein kinase TAO3	Q9H2K8;G3V1Q8;F5GWV8;H0YF68;F5H5C7	Q9H2K8;G3V1Q8	105.4	24.3037	15.1331	42	42	40	44.3	44.3	41.9	200.21	40	0	TAOK3
NSFL1C	NSFL1 cofactor p47	NSFL1 cofactor p47;NSFL1 cofactor p47	Q9UNZ2;F2Z2K0	Q9UNZ2;F2Z2K0	40.572	24.2987	NaN	14	14	14	44.9	44.9	44.9	43.291	14	0	NSFL1C
ZNRF2	E3 ubiquitin-protein ligase ZNRF2	E3 ubiquitin-protein ligase ZNRF2	Q8NHG8	Q8NHG8	24.115	24.2984	NaN	7	7	7	48.3	48.3	48.3	70.42	7	0	ZNRF2
NUDT2	Bis(5-nucleosyl)-tetraphosphatase [asymmetrical]	Bis(5-nucleosyl)-tetraphosphatase [asymmetrical]	P50583	P50583	16.829	24.2966	NaN	7	7	7	49.7	49.7	49.7	16.191	5	0	NUDT2
MARCKS	Myristoylated alanine-rich C-kinase substrate	Myristoylated alanine-rich C-kinase substrate	P29966	P29966	31.554	24.2906	NaN	10	10	10	30.7	30.7	30.7	61.511	19	0	MARCKS
PSMD9	26S proteasome non-ATPase regulatory subunit 9	26S proteasome non-ATPase regulatory subunit 9;26S proteasome non-ATPase regulatory subunit 9;26S proteasome non-ATPase regulatory subunit 9 (Fragment);26S proteasome non-ATPase regulatory subunit 9;26S proteasome non-ATPase regulatory subunit 9	J3KN29;O00233;F5H5V4;F5GX23;F5H169;F5H7X1	J3KN29;O00233;F5H5V4;F5GX23;F5H169	24.553	24.2883	NaN	12	12	12	50.5	50.5	50.5	61.949	11	0	PSMD9
BLVRA	Biliverdin reductase A	Biliverdin reductase A	P53004;C9J1E1	P53004	33.428	24.2878	NaN	14	14	14	49.3	49.3	49.3	50.452	9	0	BLVRA
SNAP29	Synaptosomal-associated protein 29;Synaptosomal-associated protein	Synaptosomal-associated protein 29;Synaptosomal-associated protein 29 (Fragment)	O95721;C9JAF7	O95721;C9JAF7	28.97	24.2859	18.735	14	14	14	59.7	59.7	59.7	55.314	17	0	SNAP29
RPL29	60S ribosomal protein L29	60S ribosomal protein L29;60S ribosomal protein L29	A0A3B3ITT5;P47914	A0A3B3ITT5;P47914	18.512	24.2852	NaN	6	6	6	28.1	28.1	28.1	10.191	5	0	RPL29
RPL28	60S ribosomal protein L28	60S ribosomal protein L28;60S ribosomal protein L28;60S ribosomal protein L28;60S ribosomal protein L28	P46779;H0YKD8;H0YMF4;H0YLP6	P46779;H0YKD8;H0YMF4;H0YLP6	15.747	24.2833	18.9421	6	6	6	52.6	52.6	52.6	16.381	6	0	RPL28
SEPTIN2	Septin-2	Septin-2;Septin-2;Septin-2 (Fragment);Septin-2 (Fragment)	Q15019;B5MCX3;C9J2Q4;C9JB25;C9J938;H7C2Y0;C9IZU3;H7C310;C9IY94;C9JQJ4;C9JZI2;A0A1B0GXJ2;C9JFT1;F8WB65;B5MD47;C9JT15;C9JSE7;H7C1T1	Q15019;B5MCX3;C9J2Q4;C9JB25	41.487	24.2758	NaN	18	18	18	72.3	72.3	72.3	166.59	20	0	SEPTIN2
DNAJB2	DnaJ homolog subfamily B member 2	DnaJ homolog subfamily B member 2;DnaJ homolog subfamily B member 2 (Fragment);DnaJ homolog subfamily B member 2 (Fragment)	P25686;C9JRD2;C9JXB9;C9J1G2;E7ETU0;C9JX00	P25686;C9JRD2;C9JXB9	35.58	24.2695	18.199	8	8	8	35.5	35.5	35.5	39.958	10	0	DNAJB2
STEAP4	Metalloreductase STEAP4	Metalloreductase STEAP4;Metalloreductase STEAP4	C9JS50;Q687X5	C9JS50;Q687X5	38.579	24.2656	NaN	12	12	12	44.2	44.2	44.2	75.763	12	0	STEAP4
PRPS1	Ribose-phosphate pyrophosphokinase 1	Ribose-phosphate pyrophosphokinase 1;Ribose-phosphate pyrophosphokinase 1;Ribose-phosphate pyrophosphokinase	B1ALA9;P60891;A0A2R8Y7H4;B7ZB02;B1ALA7;Q15244	B1ALA9;P60891;A0A2R8Y7H4	31.392	24.2615	17.5709	19	19	7	69.5	69.5	33	52.514	15	0	PRPS1
STK24	Serine/threonine-protein kinase 24;Serine/threonine-protein kinase 24 36 kDa subunit;Serine/threonine-protein kinase 24 12 kDa subunit	Serine/threonine-protein kinase 24;Serine/threonine-protein kinase 24;Serine/threonine-protein kinase 24 (Fragment);Serine/threonine-protein kinase 24 (Fragment)	B4DR80;Q9Y6E0;H0Y630;Q5JV98;Q5JV99	B4DR80;Q9Y6E0;H0Y630;Q5JV98	45.835	24.2584	NaN	11	11	7	38.1	38.1	26.2	47.469	14	0	STK24
TTC38	Tetratricopeptide repeat protein 38	Tetratricopeptide repeat protein 38;Tetratricopeptide repeat protein 38 (Fragment)	Q5R3I4;A9UJP8;H7C089;F8WBU8;H7C2L7	Q5R3I4;A9UJP8	52.787	24.2545	NaN	18	18	18	40.3	40.3	40.3	62.062	17	0	TTC38
GNPNAT1	Glucosamine 6-phosphate N-acetyltransferase	Glucosamine 6-phosphate N-acetyltransferase;Glucosamine 6-phosphate N-acetyltransferase (Fragment);Glucosamine 6-phosphate N-acetyltransferase	Q96EK6;G3V4W4;G3V5E4	Q96EK6;G3V4W4;G3V5E4	20.749	24.2519	NaN	13	13	13	70.7	70.7	70.7	74.556	10	0	GNPNAT1
SNX2	Sorting nexin-2	Sorting nexin-2	O60749;D6RC15	O60749	58.47	24.2512	NaN	25	25	24	48.6	48.6	46.6	165.46	25	0	SNX2
SNX5	Sorting nexin-5	Sorting nexin-5	Q9Y5X3;Q5QPE4;Q5QPE5;A0A087WUY5;U3KQL0;U3KQP5	Q9Y5X3	46.816	24.2479	16.6854	21	21	21	60.9	60.9	60.9	72.007	21	0	SNX5
RAB23	Ras-related protein Rab-23	Ras-related protein Rab-23	Q9ULC3	Q9ULC3	26.659	24.2424	17.1674	10	10	10	53.2	53.2	53.2	42.965	11	0	RAB23
HDDC2	HD domain-containing protein 2	HD domain-containing protein 2;HD domain-containing protein 2;HD domain-containing protein 2	Q7Z4H3;V9GYS5;V9GZ04	Q7Z4H3;V9GYS5;V9GZ04	23.39	24.2391	NaN	6	6	6	46.1	46.1	46.1	21.191	5	0	HDDC2
CNBP	Cellular nucleic acid-binding protein	Cellular nucleic acid-binding protein	P62633;D6RAT4	P62633	19.463	24.2371	NaN	11	11	11	61	61	61	51.854	12	0	CNBP
AHCYL1	Putative adenosylhomocysteinase 2	S-adenosylhomocysteine hydrolase-like protein 1	O43865	O43865	58.951	24.2291	17.8769	28	28	16	60.9	60.9	43.6	155.53	25	1	AHCYL1
RPH3AL	Rab effector Noc2	Rab effector Noc2;Rab effector Noc2 (Fragment);Rab effector Noc2 (Fragment);Rab effector Noc2 (Fragment);Rab effector Noc2 (Fragment);Rab effector Noc2 (Fragment);Rab effector Noc2 (Fragment);Rab effector Noc2 (Fragment);Rab effector Noc2 (Fragment);Rab ef	Q9UNE2;I3L2N0;I3L308;I3L2I9;I3L2X0;A0A0J9YX72;I3L3M9;I3L2G8;I3L2W0;I3NI49;I3L349;A0A0J9YWA6;I3L1Q0	Q9UNE2;I3L2N0;I3L308;I3L2I9;I3L2X0;A0A0J9YX72;I3L3M9;I3L2G8;I3L2W0;I3NI49;I3L349;A0A0J9YWA6;I3L1Q0	34.464	24.2249	NaN	9	9	9	35.9	35.9	35.9	36.114	14	0	RPH3AL
CST3	Cystatin-C	Cystatin-C	P01034	P01034	15.799	24.2231	21.403	8	8	8	52.1	52.1	52.1	20.137	8	0	CST3
CLIC4	Chloride intracellular channel protein 4	Chloride intracellular channel protein 4	Q9Y696	Q9Y696	28.772	24.2229	17.0656	13	13	13	57.3	57.3	57.3	103.4	16	0	CLIC4
PRKCD	Protein kinase C delta type;Protein kinase C delta type regulatory subunit;Protein kinase C delta type catalytic subunit	Protein kinase C delta type	Q05655;C9K0E3;C9J9P1;C9JZU8;A0A087X0I9;Q04759	Q05655	77.504	24.2219	17.028	31	31	31	52.2	52.2	52.2	226.59	30	0	PRKCD
FAM213B	Prostamide/prostaglandin F synthase	Peroxiredoxin-like 2B;Prostamide/prostaglandin F synthase;Prostamide/prostaglandin F synthase;Prostamide/prostaglandin F synthase (Fragment);Prostamide/prostaglandin F synthase (Fragment);Prostamide/prostaglandin F synthase;Prostamide/prostaglandin F synth	A0A2P0CTB1;A0A0A0MT35;Q8TBF2;J3QKK8;A0A0G2JSF1;A0A2P0CTH9;J3KRV9;A0A2P0CU24;A0A0A0MRV4;A0A0G2JRR6;J3KPF6;J3KPF5	A0A2P0CTB1;A0A0A0MT35;Q8TBF2;J3QKK8;A0A0G2JSF1;A0A2P0CTH9;J3KRV9;A0A2P0CU24;A0A0A0MRV4;A0A0G2JRR6;J3KPF6;J3KPF5	24.278	24.2179	NaN	6	6	6	34.2	34.2	34.2	39.313	10	0	FAM213B
MYO5C	Unconventional myosin-Vc	Unconventional myosin-Vc	Q9NQX4;H0YMK3;H0YM93;H0YM96	Q9NQX4	202.81	24.2175	16.2558	70	70	67	41.8	41.8	41.3	256.97	66	1	MYO5C
COPS8	COP9 signalosome complex subunit 8	COP9 signalosome complex subunit 8;COP9 signalosome complex subunit 8	E9PGT6;Q99627;H7C3S9;F8WEF2	E9PGT6;Q99627	19.344	24.217	NaN	7	7	7	65.3	65.3	65.3	27.3	11	0	COPS8
TWF2	Twinfilin-2	Twinfilin-2;Twinfilin-2;Uncharacterized protein (Fragment)	Q6IBS0;D6RG15;H0Y858;H7C5I2	Q6IBS0;D6RG15;H0Y858	39.548	24.207	15.7727	13	10	10	53.6	47.6	47.6	63.511	17	0	TWF2
PEPD	Xaa-Pro dipeptidase	Xaa-Pro dipeptidase	P12955;K7ES25;V9GY89;V9GYE4	P12955	54.548	24.1981	16.2495	18	18	18	49.9	49.9	49.9	124.46	23	0	PEPD
MTHFD1	C-1-tetrahydrofolate synthase, cytoplasmic;Methylenetetrahydrofolate dehydrogenase;Methenyltetrahydrofolate cyclohydrolase;Formyltetrahydrofolate synthetase;C-1-tetrahydrofolate synthase, cytoplasmic, N-terminally processed	C-1-tetrahydrofolate synthase, cytoplasmic;C-1-tetrahydrofolate synthase, cytoplasmic	F5H2F4;P11586;V9GYY3;A0A087WVM4;B7ZM99;Q6UB35	F5H2F4;P11586	110.61	24.1878	15.3817	44	44	44	48.4	48.4	48.4	155.61	39	0	MTHFD1
PHYHD1	Phytanoyl-CoA dioxygenase domain-containing protein 1	Phytanoyl-CoA dioxygenase domain-containing protein 1;Phytanoyl-CoA dioxygenase domain containing 1, isoform CRA_c;Phytanoyl-CoA dioxygenase domain-containing protein 1 (Fragment)	Q5SRE7;G5E9M0;X6RJK6;H7C2Q0;X6RFQ9;X6RCI6;H7C3M4;F8WCG7	Q5SRE7;G5E9M0;X6RJK6	32.41	24.1812	NaN	13	13	13	50.2	50.2	50.2	59.715	11	0	PHYHD1
ALAD	Delta-aminolevulinic acid dehydratase	Delta-aminolevulinic acid dehydratase	P13716	P13716	36.294	24.1523	NaN	11	11	9	50.6	50.6	40.3	30.837	12	0	ALAD
RPS3A	40S ribosomal protein S3a	40S ribosomal protein S3a;40S ribosomal protein S3a;40S ribosomal protein S3a (Fragment);40S ribosomal protein S3a (Fragment);40S ribosomal protein S3a;40S ribosomal protein S3a (Fragment);40S ribosomal protein S3a (Fragment);40S ribosomal protein S3a (Fra	D6RAT0;P61247;D6RG13;D6RB09;E9PFI5;H0Y8L7;D6RAS7;H0Y9Y4;D6RED7;D6R9B6;D6RGE0;D6RI02	D6RAT0;P61247;D6RG13;D6RB09;E9PFI5;H0Y8L7;D6RAS7;H0Y9Y4;D6RED7	25.887	24.151	16.1427	23	23	23	77.5	77.5	77.5	202.32	18	0	RPS3A
DNPEP	Aspartyl aminopeptidase	Aspartyl aminopeptidase, isoform CRA_b;Aspartyl aminopeptidase, isoform CRA_c;Aspartyl aminopeptidase;Aspartyl aminopeptidase;Aspartyl aminopeptidase (Fragment)	A0A024R442;E7ETB3;Q9ULA0;E7EMB6;C9JBE1;F8WAN0;E7EPX3;B9ZVU2;E5RJ35;C9J1E2;E3W974;C9JRG3	A0A024R442;E7ETB3;Q9ULA0;E7EMB6;C9JBE1	51.998	24.15	16.5186	13	13	13	48.4	48.4	48.4	114.82	13	0	DNPEP
TRIM25	E3 ubiquitin/ISG15 ligase TRIM25	E3 ubiquitin/ISG15 ligase TRIM25;E3 ubiquitin/ISG15 ligase TRIM25	Q14258;A0A3B3IUA7	Q14258;A0A3B3IUA7	70.973	24.1423	NaN	29	29	29	52.9	52.9	52.9	230.01	27	0	TRIM25
PPP2R2A	Serine/threonine-protein phosphatase 2A 55 kDa regulatory subunit B alpha isoform	Serine/threonine-protein phosphatase 2A 55 kDa regulatory subunit B alpha isoform	P63151;E5RIY1;A0A1W2PQI2;E5RFR9;E5RHQ2;E5RJV2	P63151	51.691	24.142	17.0527	19	19	12	46.5	46.5	40	119.46	24	0	PPP2R2A
HGS	Hepatocyte growth factor-regulated tyrosine kinase substrate	Hepatocyte growth factor-regulated tyrosine kinase substrate	O14964;I3L1P5;I3L1E3;I3L165;I3L2H4	O14964	86.191	24.1386	NaN	23	23	23	28.8	28.8	28.8	60.29	18	0	HGS
ARCN1	Coatomer subunit delta	Coatomer subunit delta;Archain 1, isoform CRA_a	P48444;B0YIW6;Q6P1Q5;E9PK34	P48444;B0YIW6	57.21	24.1233	16.3277	25	25	25	51.3	51.3	51.3	107.69	21	0	ARCN1
TLDC1	TLD domain-containing protein 1	TLD domain-containing protein 1;MTOR-associated protein, eak-7 homolog;MTOR-associated protein, eak-7 homolog (Fragment)	Q6P9B6;H3BM75;H3BUB0;H3BTC5;H3BQ13;H3BPI4	Q6P9B6;H3BM75;H3BUB0	50.993	24.1203	16.6933	12	12	12	42.5	42.5	42.5	60.41	18	0	TLDC1
SARS	Serine--tRNA ligase, cytoplasmic	Serine--tRNA ligase, cytoplasmic;Serine--tRNA ligase, cytoplasmic	P49591;Q5T5C7	P49591;Q5T5C7	58.777	24.1132	18.8535	22	22	22	44.2	44.2	44.2	74.724	19	2	SARS
DCTN3	Dynactin subunit 3	Dynactin subunit 3;Dynactin subunit 3 (Fragment);Dynactin subunit 3	O75935;X6RCK5;X6RLR1;X6RA56;A0A0A0MRV8	O75935;X6RCK5;X6RLR1	21.119	24.1118	NaN	9	9	9	51.6	51.6	51.6	77.745	9	0	DCTN3
GSDMD	Gasdermin-D	Gasdermin domain containing 1, isoform CRA_d;Gasdermin-D;Gasdermin-D (Fragment)	G3V1A6;P57764;E9PIB2;E9PNZ0;E9PQR9;E9PQ48;E9PRF1	G3V1A6;P57764;E9PIB2	57.734	24.11	17.8672	13	13	13	43.6	43.6	43.6	102.09	12	0	GSDMD
SGTA	Small glutamine-rich tetratricopeptide repeat-containing protein alpha	Small glutamine-rich tetratricopeptide repeat-containing protein alpha;Small glutamine-rich tetratricopeptide repeat-containing protein alpha (Fragment)	O43765;K7EMD6;K7ERW5	O43765;K7EMD6	34.063	24.1098	16.5256	10	10	10	37.7	37.7	37.7	31.452	8	1	SGTA
RPS18	40S ribosomal protein S18	40S ribosomal protein S18;40S ribosomal protein S18;40S ribosomal protein S18	P62269;A0A0G2JQH2;Q5GGW2;J3JS69	P62269;A0A0G2JQH2;Q5GGW2	17.718	24.1079	16.8361	9	9	9	48	48	48	17.688	8	0	RPS18
PTP4A2	Protein tyrosine phosphatase type IVA 2	Protein tyrosine phosphatase type IVA 2	Q12974;E9PMY3;E9PML8;E9PJC0;E9PRR9;E9PL34	Q12974	19.127	24.0984	18.352	7	7	7	56.3	56.3	56.3	28.995	6	0	PTP4A2
ATG3	Ubiquitin-like-conjugating enzyme ATG3	Ubiquitin-like-conjugating enzyme ATG3;Ubiquitin-like-conjugating enzyme ATG3	Q9NT62;F8WDI0	Q9NT62;F8WDI0	35.864	24.0918	16.95	9	9	9	34.4	34.4	34.4	26.727	9	1	ATG3
UBA5	Ubiquitin-like modifier-activating enzyme 5	Ubiquitin-like modifier-activating enzyme 5;Ubiquitin-like modifier-activating enzyme 5;Ubiquitin-like modifier-activating enzyme 5	Q9GZZ9;E7EQ61;E7EWE1;C9J5W5;C9JRV9;C9J0F6;D6RJC9	Q9GZZ9;E7EQ61;E7EWE1	44.863	24.0749	NaN	9	9	9	33.9	33.9	33.9	58.773	9	0	UBA5
BAX	Apoptosis regulator BAX	Apoptosis regulator BAX	Q07812;K4JQN1	Q07812	21.184	24.0689	NaN	5	5	5	34.9	34.9	34.9	23.641	6	0	BAX
NAPRT	Nicotinate phosphoribosyltransferase	Nicotinate phosphoribosyltransferase;Nicotinate phosphoribosyltransferase domain containing 1, isoform CRA_d;Nicotinate phosphoribosyltransferase domain containing 1, isoform CRA_e	Q6XQN6;G5E977;C9J8U2;A0A087WUT5;H0YF31;H0YDA6	Q6XQN6;G5E977;C9J8U2	57.578	24.0623	17.0293	16	16	16	40.3	40.3	40.3	109.92	16	1	NAPRT
HOOK1	Protein Hook homolog 1	Protein Hook homolog 1	Q9UJC3;B1AK95	Q9UJC3	84.647	24.0596	18.1776	40	40	40	56.9	56.9	56.9	175.97	38	0	HOOK1
DCTN1	Dynactin subunit 1	Dynactin subunit 1;Dynactin subunit 1;Dynactin subunit 1	E7EX90;Q14203;Q6AWB1;E7EWF7;C9JJD0;C9JKG6;E9PCY0;C9JZA4;C9JTE5;C9JJN7;C9J1B7	E7EX90;Q14203;Q6AWB1	139.09	24.0594	14.1591	56	56	56	44.1	44.1	44.1	288.49	44	0	DCTN1
PFKL	ATP-dependent 6-phosphofructokinase, liver type	ATP-dependent 6-phosphofructokinase, liver type	P17858;F8WEU2;V9GY25	P17858	85.018	24.0542	17.48	25	25	21	40.6	40.6	34.7	249.58	25	0	PFKL
UBE2M	NEDD8-conjugating enzyme Ubc12	NEDD8-conjugating enzyme Ubc12	P61081;M0QYI6;M0QX69	P61081	20.9	24.0536	NaN	8	8	8	44.8	44.8	44.8	23.83	4	0	UBE2M
RPL12	60S ribosomal protein L12	60S ribosomal protein L12	P30050	P30050	17.818	24.0506	NaN	7	7	7	63.6	63.6	63.6	14.978	4	0	RPL12
PPP1R2	Protein phosphatase inhibitor 2;Protein phosphatase inhibitor 2-like protein 3	Protein phosphatase inhibitor 2;Protein phosphatase inhibitor 2 (Fragment);Protein phosphatase inhibitor 2 family member B;Protein phosphatase inhibitor 2	P41236;E7EMN6;Q6NXS1;E7EUI7;H7C416	P41236;E7EMN6;Q6NXS1;E7EUI7	23.015	24.0485	18.4702	10	10	10	54.1	54.1	54.1	33.003	13	0	PPP1R2
ENY2	Transcription and mRNA export factor ENY2	Transcription and mRNA export factor ENY2	Q9NPA8;E5RHX8	Q9NPA8	11.528	24.0468	NaN	5	5	5	51.5	51.5	51.5	11.285	6	0	ENY2
TPD52L1	Tumor protein D53	Tumor protein D53;Tumor protein D53;Tumor protein D53;Tumor protein D53;Tumor protein D53 (Fragment)	E9PNK6;Q16890;E9PPQ1;J3KNE7;E9PNQ9	E9PNK6;Q16890;E9PPQ1;J3KNE7;E9PNQ9	18.661	24.0398	NaN	9	9	9	51.2	51.2	51.2	23.357	8	0	TPD52L1
CETN2	Centrin-2	Centrin-2	P41208;Q12798	P41208	19.738	24.0388	NaN	7	7	7	51.7	51.7	51.7	31.385	8	0	CETN2
EPS8L2	Epidermal growth factor receptor kinase substrate 8-like protein 2	Epidermal growth factor receptor kinase substrate 8-like protein 2;Epidermal growth factor receptor kinase substrate 8-like protein 2	Q9H6S3;A0A3B3ISQ4;A0A087WX39;H0YD62;H0YF37;E9PLH1;E9PNT0	Q9H6S3;A0A3B3ISQ4	80.62	24.0365	15.9935	30	30	30	54.5	54.5	54.5	194.45	30	1	EPS8L2
STRAP	Serine-threonine kinase receptor-associated protein	Serine-threonine kinase receptor-associated protein	Q9Y3F4;H0YH33	Q9Y3F4	38.438	24.031	16.429	16	16	16	58.9	58.9	58.9	67.483	14	0	STRAP
GALM	Aldose 1-epimerase	Aldose 1-epimerase;Aldose 1-epimerase	Q96C23;B8ZZ75;H7C320;H7C1B5	Q96C23;B8ZZ75	37.765	24.0299	15.8501	10	10	10	40.1	40.1	40.1	47.924	12	1	GALM
RAB8B	Ras-related protein Rab-8B	Ras-related protein Rab-8B;Ras-related protein Rab-8B (Fragment)	Q92930;H0YNE9;H0YMN7	Q92930;H0YNE9	23.584	24.0285	NaN	9	6	6	47.8	34.3	34.3	32.735	8	0	RAB8B
EXOC7	Exocyst complex component 7	Exocyst complex component 7;Exocyst complex component 7;Exocyst complex component 7 (Fragment);Exocyst complex component 7	Q9UPT5;A0A0A0MSB8;A0A0A0MRE1;B4DJ07;B5MCY9;K7ERQ5;C9JME6;C9JKC2	Q9UPT5;A0A0A0MSB8;A0A0A0MRE1;B4DJ07	83.381	24.0208	15.1085	30	30	30	53.2	53.2	53.2	99.269	35	0	EXOC7
PMM2	Phosphomannomutase 2;Phosphomannomutase	Phosphomannomutase 2;Phosphomannomutase;Phosphomannomutase;Phosphomannomutase (Fragment)	O15305;H3BV55;H3BRM0;H3BPH4;H3BR08;H3BM92;H3BV34;H3BT06;H3BNY9	O15305;H3BV55;H3BRM0;H3BPH4	28.082	24.0195	NaN	14	14	12	59.8	59.8	56.5	48.553	7	0	PMM2
CRYZ	Quinone oxidoreductase	Quinone oxidoreductase;Quinone oxidoreductase (Fragment);Quinone oxidoreductase (Fragment)	Q08257;C9JH92;A6NP24	Q08257;C9JH92;A6NP24	35.206	24.007	16.3135	15	15	15	47.4	47.4	47.4	51.814	18	1	CRYZ
MYO6	Unconventional myosin-VI	Unconventional myosin-VI;Unconventional myosin-VI;Unconventional myosin-VI	A0A0D9SGC1;E7EW20;Q9UM54;Q5JVM0	A0A0D9SGC1;E7EW20;Q9UM54	149.63	24.0021	16.9638	53	53	3	49.2	49.2	1.9	323.31	50	1	MYO6
GMPR2	GMP reductase;GMP reductase 2	GMP reductase;GMP reductase;GMP reductase;GMP reductase 2;GMP reductase;GMP reductase;GMP reductase 2 (Fragment);GMP reductase 2 (Fragment)	A0A087WWM4;F8WAN9;H0YNJ6;Q9P2T1;H0YMB3;H0YLV5;H0YK13;H0YLB8;H0YK71;H0YN22;H0YNH0;H0YMW6;H0YMR9;H0YMV5;A0A0B4J281;H0YMG3;H0YKK3;H0YN74;H0YL68;H0YKE1	A0A087WWM4;F8WAN9;H0YNJ6;Q9P2T1;H0YMB3;H0YLV5;H0YK13;H0YLB8	38.217	24.0001	16.9686	19	17	10	62.6	56.6	29.9	138.12	15	0	GMPR2
PGM1	Phosphoglucomutase-1	Phosphoglucomutase-1;Phosphoglucomutase-1	P36871;A0A3B3ITK7	P36871;A0A3B3ITK7	61.448	23.9982	NaN	31	31	31	64.8	64.8	64.8	133.92	16	0	PGM1
GSTA1	Glutathione S-transferase A1;Glutathione S-transferase A1, N-terminally processed;Glutathione S-transferase A2	Glutathione S-transferase A1;Glutathione S-transferase A2	P08263;P09210;Q16772;Q5JW85;Q7RTV2;Q5JW84	P08263;P09210	25.631	23.9938	NaN	19	19	19	60.4	60.4	60.4	52.244	10	0	GSTA1
PCYT2	Ethanolamine-phosphate cytidylyltransferase	Ethanolamine-phosphate cytidylyltransferase;Ethanolamine-phosphate cytidylyltransferase;Ethanolamine-phosphate cytidylyltransferase (Fragment);Ethanolamine-phosphate cytidylyltransferase (Fragment)	Q99447;I3L1R7;I3L1L9;I3L2Q1;I3L3V9;I3L1C4;I3L102	Q99447;I3L1R7;I3L1L9;I3L2Q1	43.835	23.9925	18.006	16	16	16	46.5	46.5	46.5	58.081	22	0	PCYT2
ARPIN	Arpin	Arpin;Protein C15orf38-AP3S2	Q7Z6K5;A0A0A6YYH1;H0YMP5;H0YL03;H0YL85;H0YMK0	Q7Z6K5;A0A0A6YYH1	24.943	23.9898	17.2127	10	10	10	44.7	44.7	44.7	33.985	11	0	ARPIN
GMDS	GDP-mannose 4,6 dehydratase	GDP-mannose 4,6 dehydratase	O60547	O60547	41.949	23.989	NaN	12	12	12	44.6	44.6	44.6	75.069	12	0	GMDS
RPS24	40S ribosomal protein S24	40S ribosomal protein S24;40S ribosomal protein S24;40S ribosomal protein S24;40S ribosomal protein S24;40S ribosomal protein S24;40S ribosomal protein S24 (Fragment)	E7ETK0;A0A2R8Y849;A0A087WUS0;A0A2R8YD14;P62847;A0A2R8Y8A0	E7ETK0;A0A2R8Y849;A0A087WUS0;A0A2R8YD14;P62847;A0A2R8Y8A0	15.197	23.9866	NaN	6	6	6	38.2	38.2	38.2	16.1	4	0	RPS24
DYNC1H1	Cytoplasmic dynein 1 heavy chain 1	Cytoplasmic dynein 1 heavy chain 1	Q14204;A0A2R8Y706;A0A2R8YFZ7;A0A2R8Y5T0;A0A2R8Y6H2;A0A2R8Y542;H0YJ21;A0A2R8YGC7;A0A2R8Y6I5	Q14204	532.4	23.9862	16.3589	184	184	184	46	46	46	323.31	141	1	DYNC1H1
FTH1	Ferritin heavy chain;Ferritin heavy chain, N-terminally processed;Ferritin	Ferritin heavy chain;Ferritin;Ferritin	P02794;G3V192;G3V1D1;E9PRK8;E9PKY7;E9PQR3;E9PKM5;E9PK45;E9PPQ4	P02794;G3V192;G3V1D1	21.225	23.9857	NaN	11	11	11	78.1	78.1	78.1	33.593	14	0	FTH1
RPS13	40S ribosomal protein S13	40S ribosomal protein S13;40S ribosomal protein S13;40S ribosomal protein S13 (Fragment)	P62277;J3KMX5;E9PS50	P62277;J3KMX5;E9PS50	17.222	23.9815	NaN	12	12	12	53	53	53	41.831	10	0	RPS13
LHPP	Phospholysine phosphohistidine inorganic pyrophosphate phosphatase	Phospholysine phosphohistidine inorganic pyrophosphate phosphatase;Phospholysine phosphohistidine inorganic pyrophosphate phosphatase	Q9H008;Q5T1Z0	Q9H008;Q5T1Z0	29.165	23.9773	NaN	12	12	12	51.5	51.5	51.5	53.154	9	0	LHPP
VPS37B	Vacuolar protein sorting-associated protein 37B	Vacuolar protein sorting-associated protein 37B;Vacuolar protein sorting-associated protein 37B (Fragment);Vacuolar protein sorting-associated protein 37B (Fragment)	Q9H9H4;F5H4M0;F5H1F6	Q9H9H4;F5H4M0;F5H1F6	31.307	23.9772	23.9908	20	20	20	71.9	71.9	71.9	112.88	12	12	VPS37B
PITPNB	Phosphatidylinositol transfer protein beta isoform	Phosphatidylinositol transfer protein beta isoform;Phosphatidylinositol transfer protein beta isoform;Phosphatidylinositol transfer protein beta isoform (Fragment)	A0A0A0MSW4;P48739;B3KYB6;B3KYB7	A0A0A0MSW4;P48739;B3KYB6	31.581	23.9678	NaN	7	6	6	30.6	27.3	27.3	28.082	10	0	PITPNB
MYOF	Myoferlin	Myoferlin;Myoferlin (Fragment)	Q9NZM1;H0YD14	Q9NZM1;H0YD14	234.71	23.9652	17.17	69	69	69	35.8	35.8	35.8	299.16	74	1	MYOF
SPON2	Spondin-2	Spondin-2;Spondin-2 (Fragment)	Q9BUD6;D6RB12;D6RBY3;D6RIH5	Q9BUD6;D6RB12	35.846	23.9644	21.7223	11	11	11	41.4	41.4	41.4	51.955	3	3	SPON2
PSMF1	Proteasome inhibitor PI31 subunit	Proteasome inhibitor PI31 subunit;Proteasome inhibitor PI31 subunit;Proteasome inhibitor PI31 subunit (Fragment)	Q5QPM7;Q92530;Q5QPM9;F5H4Z3;H0Y555	Q5QPM7;Q92530;Q5QPM9	28.956	23.9633	NaN	7	7	7	34.2	34.2	34.2	14.493	5	0	PSMF1
TSG101	Tumor susceptibility gene 101 protein	Tumor susceptibility gene 101 protein;Tumor susceptibility gene 101 protein	Q99816;F5H442;J3QRU6;J3QKS4	Q99816;F5H442	43.944	23.9479	21.916	27	27	27	48.5	48.5	48.5	151.53	9	9	TSG101
RCAN3	Calcipressin-3	Calcipressin-3;Calcipressin-3 (Fragment)	Q9UKA8;H0YF64	Q9UKA8;H0YF64	27.491	23.9442	NaN	6	6	6	44.4	44.4	44.4	18.124	5	0	RCAN3
PPM1B	Protein phosphatase 1B	Protein phosphatase 1B;Protein phosphatase 1B (Fragment);Uncharacterized protein;Protein phosphatase 1B (Fragment)	O75688;C9JIR6;A0A3B3IS24;B8ZZF0	O75688;C9JIR6;A0A3B3IS24;B8ZZF0	52.642	23.9438	NaN	19	17	17	51.1	46.6	46.6	73.881	14	0	PPM1B
HSPH1	Heat shock protein 105 kDa	Heat shock protein 105 kDa;Heat shock protein 105 kDa	Q92598;A0A0A0MSM0;R4GN69;Q5TBM3	Q92598;A0A0A0MSM0	96.864	23.9423	NaN	35	32	30	43.9	40.1	38.9	173.57	35	0	HSPH1
ANO7	Anoctamin-7	Anoctamin-7	Q6IWH7	Q6IWH7	105.53	23.9362	17.1032	14	14	14	13.9	13.9	13.9	81.747	15	0	ANO7
ITM2B	Integral membrane protein 2B;BRI2, membrane form;BRI2 intracellular domain;BRI2C, soluble form;Bri23 peptide	Integral membrane protein 2B;Integral membrane protein 2B	Q9Y287;A0A3B3IUC0;A0A3B3IU60;A0A3B3ITP9;A0A3B3ISG3	Q9Y287;A0A3B3IUC0	30.338	23.9243	20.6188	8	8	8	38.3	38.3	38.3	31.791	6	3	ITM2B
ARPC2	Actin-related protein 2/3 complex subunit 2	Actin-related protein 2/3 complex subunit 2	O15144;H7C3F9;C9JTV5;G5E9J0;G5E9S7	O15144	34.333	23.9197	15.0654	15	15	15	59.3	59.3	59.3	44.703	14	0	ARPC2
HDHD2	Haloacid dehalogenase-like hydrolase domain-containing protein 2	Haloacid dehalogenase-like hydrolase domain-containing protein 2;Haloacid dehalogenase-like hydrolase domain-containing protein 2 (Fragment);Haloacid dehalogenase-like hydrolase domain-containing protein 2 (Fragment);Haloacid dehalogenase-like hydrolase do	Q9H0R4;K7ER15;K7EMY7;K7EQD2;K7EJQ8;A0A1B0GXB1;K7EKX8	Q9H0R4;K7ER15;K7EMY7;K7EQD2;K7EJQ8;A0A1B0GXB1	28.536	23.9182	NaN	11	11	11	70.7	70.7	70.7	44.139	16	0	HDHD2
NDRG2	Protein NDRG2	Protein NDRG2;Protein NDRG2;Protein NDRG2 (Fragment);Protein NDRG2;Protein NDRG2 (Fragment)	Q9UN36;G3V578;H0YJT9;A0A0A0MS87;G3V4S9;G3V5L7;G3V5H8;A0A0U1RR50;G3V2I9;G3V5B5;G3V5P9;G3V2S0;G3V552;G3V3P6;G3V4T9;G3V2T2;G3V3P1;G3V3D5;G3V358;G3V383;G3V5S0;G3V4X3;G3V239;G3V5D7;G3V420;G3V3C3;G3V2Y3;G3V5G7;G3V3X3;G3V237;G3V5A6;G3V280;G3V5V9;G3V3X2;G3V285;G3V4S2;G3V271;G3V2A6;G3V5B7;H7C0X0;G3V392;G3V5G0	Q9UN36;G3V578;H0YJT9;A0A0A0MS87;G3V4S9	40.798	23.9103	17.2948	14	14	14	46.6	46.6	46.6	106.8	15	2	NDRG2
SETD7	Histone-lysine N-methyltransferase SETD7	Histone-lysine N-methyltransferase SETD7;Histone-lysine N-methyltransferase	Q8WTS6;D6RJA0	Q8WTS6;D6RJA0	40.72	23.9088	NaN	11	11	11	46.4	46.4	46.4	84.527	16	0	SETD7
HDLBP	Vigilin	High density lipoprotein binding protein (Vigilin), isoform CRA_a;Vigilin;Vigilin (Fragment)	A0A024R4E5;Q00341;H0Y394;H7C0A4;C9JIZ1;C9J5E5;C9JZI8;C9JHS7;C9JHZ8;C9JES8;H7BZC3;H7C2D1;C9JT62;C9JK79;C9JBS3;C9JEJ8;C9JHN6;C9JQ82;C9JMQ6;C9JHS9;C9J739	A0A024R4E5;Q00341;H0Y394	141.44	23.9055	16.2006	65	65	65	57.1	57.1	57.1	238.67	49	1	HDLBP
RPS5	40S ribosomal protein S5;40S ribosomal protein S5, N-terminally processed	40S ribosomal protein S5 (Fragment);40S ribosomal protein S5;40S ribosomal protein S5;40S ribosomal protein S5	M0R0F0;P46782;M0R0R2;M0QZN2	M0R0F0;P46782;M0R0R2;M0QZN2	22.391	23.9035	16.4885	9	9	9	52.5	52.5	52.5	70.232	5	0	RPS5
STAT1	Signal transducer and activator of transcription 1-alpha/beta;Signal transducer and activator of transcription	Signal transducer and activator of transcription 1-alpha/beta;Signal transducer and activator of transcription;Signal transducer and activator of transcription 1-alpha/beta (Fragment);Signal transducer and activator of transcription 1-alpha/beta	P42224;J3KPM9;E7EPD2;D2KFR9;E7ENM1;E9PH66;H7BZB5;H7BZ88	P42224;J3KPM9;E7EPD2;D2KFR9	87.334	23.8998	NaN	29	29	29	43.1	43.1	43.1	124.97	27	0	STAT1
C1orf123	UPF0587 protein C1orf123	UPF0587 protein C1orf123	Q9NWV4	Q9NWV4	18.048	23.8966	NaN	8	8	8	55	55	55	56.697	5	0	C1orf123
ITPA	Inosine triphosphate pyrophosphatase	Inosine triphosphate pyrophosphatase	Q9BY32	Q9BY32	21.445	23.8937	NaN	9	9	9	64.9	64.9	64.9	89.108	7	0	ITPA
PSMC1	26S protease regulatory subunit 4	26S proteasome regulatory subunit 4	P62191	P62191	49.184	23.8935	NaN	20	20	20	45.7	45.7	45.7	102.04	22	0	PSMC1
MTHFS	5-formyltetrahydrofolate cyclo-ligase	5-formyltetrahydrofolate cyclo-ligase;5-formyltetrahydrofolate cyclo-ligase;5-formyltetrahydrofolate cyclo-ligase;ST20-MTHFS readthrough (Fragment)	P49914;A0A0A6YYL1;A0A0U1RQM3;A0A0U1RR23;H3BN04	P49914;A0A0A6YYL1;A0A0U1RQM3;A0A0U1RR23	23.255	23.8866	NaN	9	9	9	50.2	50.2	50.2	21.463	9	0	MTHFS
DYNC1LI2	Cytoplasmic dynein 1 light intermediate chain 2	Cytoplasmic dynein 1 light intermediate chain 2	O43237;J3KRI4;B4E2E0;J3KRZ2;H3BUM4;J3KSD2	O43237	54.099	23.88	NaN	22	22	22	57.1	57.1	57.1	124.9	27	0	DYNC1LI2
ATP6V1H	V-type proton ATPase subunit H	V-type proton ATPase subunit H;V-type proton ATPase subunit H	Q9UI12;G3V126;E5RG49;E5RHH0;E5RK31;E5RJG1	Q9UI12;G3V126	55.882	23.8769	NaN	14	14	14	38.1	38.1	38.1	79.225	16	0	ATP6V1H
VPS29	Vacuolar protein sorting-associated protein 29	Vacuolar protein sorting-associated protein 29;Vacuolar protein sorting-associated protein 29	Q9UBQ0;F8VXU5	Q9UBQ0;F8VXU5	20.505	23.8763	NaN	12	12	12	55.5	55.5	55.5	49.636	9	0	VPS29
HSP90AB2P	Putative heat shock protein HSP 90-beta 2	Putative heat shock protein HSP 90-beta 2	Q58FF8	Q58FF8	44.348	23.8691	16.7913	11	2	2	22	4.5	4.5	6.5249	5	1	HSP90AB2P
UFC1	Ubiquitin-fold modifier-conjugating enzyme 1	Ubiquitin-fold modifier-conjugating enzyme 1	Q9Y3C8	Q9Y3C8	19.458	23.8685	NaN	7	7	7	43.7	43.7	43.7	13.063	4	0	UFC1
PATE1	Prostate and testis expressed protein 1	Prostate and testis expressed protein 1	Q8WXA2	Q8WXA2	14.271	23.8658	24.4881	9	9	9	55.6	55.6	55.6	26.281	4	7	PATE1
TES	Testin	Testin	Q9UGI8;F8W7T0;F8WDI4;H7BYK1	Q9UGI8	47.996	23.8616	NaN	22	22	22	60.8	60.8	60.8	104.61	23	0	TES
ATP6V0D1	V-type proton ATPase subunit d 1	V-type proton ATPase subunit d 1;V-type proton ATPase subunit;V-type proton ATPase subunit d 1;V-type proton ATPase subunit d 1 (Fragment)	R4GN72;F5GYQ1;P61421;J3QL14;H3BQJ1	R4GN72;F5GYQ1;P61421;J3QL14	31.676	23.8602	NaN	7	7	7	43.1	43.1	43.1	56.707	7	0	ATP6V0D1
KIF13B	Kinesin-like protein KIF13B	Kinesin-like protein KIF13B	Q9NQT8;E7ERX9;H0YBA8	Q9NQT8	202.79	23.8591	15.7179	57	57	55	39.8	39.8	38.6	254.41	62	1	KIF13B
NT5E	5-nucleotidase	5-nucleotidase;5-nucleotidase	P21589;Q96B60;H0Y7R7;H0Y3X5	P21589;Q96B60	63.367	23.8581	22.2203	26	26	26	52.1	52.1	52.1	155.12	14	13	NT5E
LIMS1	LIM and senescent cell antigen-like-containing domain protein 1;LIM and senescent cell antigen-like-containing domain protein 2	LIM and senescent cell antigen-like-containing domain protein 1;LIM and senescent cell antigen-like-containing domain protein 1 (Fragment);LIM and senescent cell antigen-like-containing domain protein 2	P48059;A0A0M3HER1;Q7Z4I7;H0Y592	P48059;A0A0M3HER1;Q7Z4I7	37.251	23.8553	24.9639	8	8	2	35.7	35.7	11.4	33.903	7	2	LIMS1
UNC13B	Protein unc-13 homolog B	Protein unc-13 homolog B;Protein unc-13 homolog B;Protein unc-13 homolog B;Protein unc-13 homolog B;Protein unc-13 homolog B;Protein unc-13 homolog B	O14795;B1AM27;A0A1B0GUS7;A0A1B0GVW8;I6L9J0;F8W8M9;F8VZH8;F8W0P6;F8W059;Q9UPW8;A0A0U1RRL2	O14795;B1AM27;A0A1B0GUS7;A0A1B0GVW8;I6L9J0;F8W8M9	180.68	23.8481	15.7927	47	47	41	34.6	34.6	32.3	253.64	55	1	UNC13B
CAMK1	Calcium/calmodulin-dependent protein kinase type 1	Calcium/calmodulin-dependent protein kinase type 1	Q14012;C9JES6;H7C071;F8W6S9;A0A087WUR6;Q8IU85	Q14012	41.337	23.848	NaN	15	15	15	52.4	52.4	52.4	64.368	9	0	CAMK1
RPS4X	40S ribosomal protein S4, X isoform	40S ribosomal protein S4, X isoform	P62701;Q8TD47;C9JEH7;P22090	P62701	29.597	23.8378	16.4633	17	17	17	59.3	59.3	59.3	44.609	12	0	RPS4X
COASY	Bifunctional coenzyme A synthase;Phosphopantetheine adenylyltransferase;Dephospho-CoA kinase	Bifunctional coenzyme A synthase	Q13057;K7EQ60;K7EN91;K7ES73;K7ESK6;K7EP09;K7EPC2;K7EPT0	Q13057	62.328	23.836	17.5896	17	17	17	46.5	46.5	46.5	67.988	16	0	COASY
HID1	Protein HID1	Protein HID1	Q8IV36;E9PIM7;J3KSF1;E9PMS4	Q8IV36	88.743	23.8323	NaN	17	17	17	24.4	24.4	24.4	60.626	21	0	HID1
PSMA4	Proteasome subunit alpha type-4;Proteasome subunit alpha type;Proteasome subunit beta type	Proteasome subunit alpha type-4;Proteasome subunit alpha type;Proteasome subunit alpha type (Fragment);Proteasome subunit alpha type (Fragment);Proteasome subunit alpha type (Fragment);Proteasome subunit alpha type;Proteasome endopeptidase complex;Proteaso	P25789;H0YLC2;H0YMA1;H0YMZ1;H0YL69;H0YLS6;H0YN18;H0YKT8;H0YMI6;H0YMV3;H0YKS0	P25789;H0YLC2;H0YMA1;H0YMZ1;H0YL69;H0YLS6;H0YN18;H0YKT8;H0YMI6	29.483	23.8297	19.2144	7	7	7	44.8	44.8	44.8	40.998	6	0	PSMA4
FAM96B	Mitotic spindle-associated MMXD complex subunit MIP18	Cytosolic iron-sulfur assembly component 2B;Cytosolic iron-sulfur assembly component 2B (Fragment)	Q9Y3D0;H3BNV7;J3KS95;J3QLT9	Q9Y3D0;H3BNV7	17.663	23.8273	NaN	5	5	5	56.4	56.4	56.4	27.461	4	0	FAM96B
RPL34	60S ribosomal protein L34	60S ribosomal protein L34	P49207	P49207	13.293	23.826	17.7101	9	9	9	50.4	50.4	50.4	14.375	10	0	RPL34
NUDT5	ADP-sugar pyrophosphatase	ADP-sugar pyrophosphatase;ADP-sugar pyrophosphatase;ADP-sugar pyrophosphatase;ADP-sugar pyrophosphatase	A6NFX8;Q9UKK9;A6NCQ0;A6NJU6;C9JYY9;H0YEY4	A6NFX8;Q9UKK9;A6NCQ0;A6NJU6	25.895	23.8223	NaN	7	7	7	38.8	38.8	38.8	13.816	7	0	NUDT5
ASMTL	N-acetylserotonin O-methyltransferase-like protein	N-acetylserotonin O-methyltransferase-like protein	O95671	O95671	68.856	23.8207	15.8819	25	25	25	54.6	54.6	54.6	118.34	23	0	ASMTL
PEF1	Peflin	Peflin	Q9UBV8	Q9UBV8	30.381	23.8167	19.4046	6	6	6	33.5	33.5	33.5	12.466	4	0	PEF1
MYO1C	Unconventional myosin-Ic	Unconventional myosin-Ic;Unconventional myosin-Ic	F5H6E2;O00159;I3L501	F5H6E2;O00159	118.99	23.8147	NaN	42	42	24	45.9	45.9	28.7	200.43	35	0	MYO1C
CAPN2	Calpain-2 catalytic subunit	Calpain-2 catalytic subunit	P17655	P17655	79.994	23.8121	17.0548	21	21	21	40.1	40.1	40.1	114.38	27	0	CAPN2
KPNB1	Importin subunit beta-1	Importin subunit beta-1;Importin subunit beta-1 (Fragment)	Q14974;J3QR48;J3KTM9;J3KS06	Q14974;J3QR48	97.169	23.8016	NaN	15	15	14	19.4	19.4	18.5	97.223	17	0	KPNB1
MYCBP	C-Myc-binding protein	Uncharacterized protein;c-Myc-binding protein	A0A087WV05;Q99417;A0A0D9SEI7	A0A087WV05;Q99417	12.755	23.7931	NaN	7	7	7	53.6	53.6	53.6	15.088	7	0	MYCBP
PTER	Phosphotriesterase-related protein	Phosphotriesterase-related protein;Phosphotriesterase-related protein	Q96BW5;A0A0A0MSI3	Q96BW5;A0A0A0MSI3	39.017	23.79	NaN	15	15	15	70.5	70.5	70.5	108.06	15	0	PTER
LRRFIP1	Leucine-rich repeat flightless-interacting protein 1	Leucine-rich repeat flightless-interacting protein 1	Q32MZ4;C9JTC6	Q32MZ4	89.252	23.784	NaN	19	19	18	26.4	26.4	24.9	235.02	25	0	LRRFIP1
SEC13	Protein SEC13 homolog	Protein SEC13 homolog;Protein SEC13 homolog	P55735;A8MXL6;E7ERC8	P55735;A8MXL6	35.54	23.7821	18.2501	7	7	7	38.5	38.5	38.5	29.053	4	2	SEC13
NRAS	GTPase NRas	GTPase NRas	P01111;G3V4K2;G3V5T7	P01111	21.229	23.778	NaN	13	7	5	84.7	40.2	32.8	16.097	11	0	NRAS
ARFGAP3	ADP-ribosylation factor GTPase-activating protein 3	ADP-ribosylation factor GTPase-activating protein 3	Q9NP61;B0QYV8;B0QYV9	Q9NP61	56.928	23.7776	NaN	16	16	8	42.8	42.8	19.8	149.95	16	0	ARFGAP3
UBQLN1	Ubiquilin-1	Ubiquilin-1	Q9UMX0	Q9UMX0	62.518	23.7774	NaN	10	10	6	19.2	19.2	16.3	56.104	6	0	UBQLN1
PPME1	Protein phosphatase methylesterase 1	Protein phosphatase methylesterase 1	Q9Y570	Q9Y570	42.315	23.777	NaN	15	15	15	52.8	52.8	52.8	48.4	13	0	PPME1
RAB25	Ras-related protein Rab-25	Ras-related protein Rab-25	P57735	P57735	23.495	23.774	NaN	8	6	6	31.5	26.8	26.8	13.481	6	0	RAB25
OSBP	Oxysterol-binding protein 1	Oxysterol-binding protein 1	P22059;H0YCV6;A0A0A0MSB4;Q6ZN50;Q969R2	P22059	89.42	23.7738	14.5678	24	24	24	31.7	31.7	31.7	198.82	21	0	OSBP
GPRC5C	G-protein coupled receptor family C group 5 member C	G-protein-coupled receptor family C group 5 member C;G-protein coupled receptor family C group 5 member C;G-protein-coupled receptor family C group 5 member C (Fragment);G-protein-coupled receptor family C group 5 member C	A0A0C4DFY5;Q9NQ84;A8MXZ4;J9JIE0;J3KTP8	A0A0C4DFY5;Q9NQ84;A8MXZ4;J9JIE0	52.934	23.773	19.8968	15	15	15	27.8	27.8	27.8	85.481	13	1	GPRC5C
AKR1B1	Aldose reductase	Aldose reductase;Aldose reductase	P15121;E9PCX2;E9PEF9;C9JRZ8	P15121;E9PCX2	35.853	23.7644	23.4947	16	16	16	67.7	67.7	67.7	101.91	7	15	AKR1B1
NQO2	Ribosyldihydronicotinamide dehydrogenase [quinone]	Ribosyldihydronicotinamide dehydrogenase [quinone];Ribosyldihydronicotinamide dehydrogenase [quinone];Ribosyldihydronicotinamide dehydrogenase [quinone] (Fragment)	Q5TD07;P16083;Q5TD05;A2A2U4	Q5TD07;P16083;Q5TD05	21.537	23.7582	NaN	6	6	6	53.9	53.9	53.9	30.297	6	0	NQO2
NUDT9	ADP-ribose pyrophosphatase, mitochondrial	ADP-ribose pyrophosphatase, mitochondrial;ADP-ribose pyrophosphatase, mitochondrial (Fragment);ADP-ribose pyrophosphatase, mitochondrial (Fragment)	Q9BW91;D6RAW2;H7C386;D6R8Z6	Q9BW91;D6RAW2;H7C386	39.125	23.7572	17.1274	14	14	14	47.4	47.4	47.4	40.89	11	0	NUDT9
SELENBP1	Selenium-binding protein 1	Methanethiol oxidase;Methanethiol oxidase (Fragment);Methanethiol oxidase;Methanethiol oxidase	Q13228;A6PVX1;F2Z2W8;F8WCR4;H0Y532;C9JVL0	Q13228;A6PVX1;F2Z2W8;F8WCR4	52.39	23.7464	16.376	18	18	18	48.5	48.5	48.5	107.39	14	0	SELENBP1
OLA1	Obg-like ATPase 1	Obg-like ATPase 1;Obg-like ATPase 1	J3KQ32;Q9NTK5;C9JTK6;C9JCJ9	J3KQ32;Q9NTK5	46.937	23.743	15.097	16	16	16	42.5	42.5	42.5	47.171	13	0	OLA1
ACTN1	Alpha-actinin-1	Alpha-actinin-1	P12814;G3V2N5;P35609;Q08043;G3V5M4;A0A087WSZ2;G3V380	P12814	103.06	23.7351	16.3499	51	29	3	62.2	42.8	5.5	317.23	29	0	ACTN1
VCL	Vinculin	Vinculin	P18206;A0A096LPE1	P18206	123.8	23.7342	14.7017	55	55	55	56.7	56.7	56.7	323.31	46	0	VCL
GSR	Glutathione reductase, mitochondrial	Glutathione reductase, mitochondrial	P00390;A0A2R8YF59;H0YC68	P00390	56.256	23.7333	NaN	16	16	16	36.4	36.4	36.4	85.614	12	0	GSR
PPP3CA	Serine/threonine-protein phosphatase 2B catalytic subunit alpha isoform;Serine/threonine-protein phosphatase	Serine/threonine-protein phosphatase 2B catalytic subunit alpha isoform;Serine/threonine-protein phosphatase	Q08209;E7ETC2;Q5F2F8;P16298;E9PPC8;E9PK68;E5RJH4;Q5F2G0;H0YB04;H0YC26;G3V111;P48454	Q08209;E7ETC2	58.687	23.7309	NaN	17	17	17	40.5	40.5	40.5	51.486	17	0	PPP3CA
HPRT1	Hypoxanthine-guanine phosphoribosyltransferase	Hypoxanthine-guanine phosphoribosyltransferase	P00492	P00492	24.579	23.7293	NaN	11	11	11	56.4	56.4	56.4	55.296	9	0	HPRT1
DUSP3	Dual specificity protein phosphatase 3	Dual specificity protein phosphatase 3;Dual-specificity protein phosphatase 3 (Fragment)	P51452;K7ES89;K7ELG5	P51452;K7ES89	20.478	23.7259	NaN	6	6	6	43.2	43.2	43.2	23.204	8	0	DUSP3
NAGK	N-acetyl-D-glucosamine kinase	N-acetyl-D-glucosamine kinase;N-acetyl-D-glucosamine kinase;N-acetyl-D-glucosamine kinase;N-acetyl-D-glucosamine kinase (Fragment)	H7C3G9;Q9UJ70;C9JEV6;H0YEB7;H7C1L7;H7C286;E9PPU6;H0YE82;H0YF44;H0YC94	H7C3G9;Q9UJ70;C9JEV6;H0YEB7	36.888	23.7229	NaN	11	11	11	44.4	44.4	44.4	36.753	5	0	NAGK
STXBP1	Syntaxin-binding protein 1	Syntaxin-binding protein 1;Syntaxin-binding protein 1;Syntaxin-binding protein 1 (Fragment);Syntaxin-binding protein 1;Syntaxin-binding protein 1;Syntaxin-binding protein 1;Syntaxin-binding protein 1	A0A1B0GWF2;A0A1B0GVQ5;A0A2R8Y5D4;A0A0D9SG72;A0A1B0GTP9;P61764;A0A1B0GW76;A0A0D9SFQ7;A0A0D9SFW6;A0A0D9SEH5;A0A0D9SEP9;A0A096LP33;A0A096LP52;A0A1B0GTD8;A0A1B0GVV9	A0A1B0GWF2;A0A1B0GVQ5;A0A2R8Y5D4;A0A0D9SG72;A0A1B0GTP9;P61764;A0A1B0GW76	65.215	23.7104	NaN	17	16	16	40.4	39.2	39.2	52.055	20	0	STXBP1
PSMD11	26S proteasome non-ATPase regulatory subunit 11	26S proteasome non-ATPase regulatory subunit 11	O00231;J3QRY4;J3QS13;J3KSW3	O00231	47.463	23.7102	16.6035	21	21	21	55.9	55.9	55.9	70.665	13	0	PSMD11
PSMD7	26S proteasome non-ATPase regulatory subunit 7	26S proteasome non-ATPase regulatory subunit 7;26S proteasome non-ATPase regulatory subunit 7;26S proteasome non-ATPase regulatory subunit 7	P51665;H3BNT7;H3BTM8;H3BQV2	P51665;H3BNT7;H3BTM8	37.025	23.7005	15.1298	11	11	11	48.1	48.1	48.1	43.282	12	0	PSMD7
CFL2	Cofilin-2	Cofilin-2	Q9Y281;F8WDN3;G3V2U0	Q9Y281	18.736	23.6967	16.7287	20	9	9	72.3	44.6	44.6	54.986	8	0	CFL2
EIF3D	Eukaryotic translation initiation factor 3 subunit D	Eukaryotic translation initiation factor 3 subunit D;Eukaryotic translation initiation factor 3 subunit D (Fragment)	O15371;B0QYA5;B0QYA4;B0QYA6;B0QYA8	O15371;B0QYA5	63.972	23.6964	17.6291	14	14	14	36.3	36.3	36.3	113.62	14	0	EIF3D
EIF2S3	Eukaryotic translation initiation factor 2 subunit 3;Putative eukaryotic translation initiation factor 2 subunit 3-like protein	Eukaryotic translation initiation factor 2 subunit 3;Eukaryotic translation initiation factor 2 subunit 3B	P41091;Q2VIR3;H7BZU1	P41091;Q2VIR3	51.109	23.68	16.7268	19	19	19	47.7	47.7	47.7	71.387	16	0	EIF2S3
ARHGAP6	Rho GTPase-activating protein 6	Rho GTPase-activating protein 6;Rho GTPase-activating protein 6 (Fragment)	O43182;H7BYE6	O43182;H7BYE6	105.95	23.6748	NaN	34	34	34	43.4	43.4	43.4	172.6	31	0	ARHGAP6
HOMER2	Homer protein homolog 2	Homer protein homolog 2	Q9NSB8;H0YNR9;M0R2T8;M0QZN1;M0R2U7;Q86YM7;Q9NSC5	Q9NSB8	40.627	23.6725	NaN	12	12	12	48	48	48	61.559	12	0	HOMER2
RP2	Protein XRP2	Protein XRP2	O75695	O75695	39.641	23.6689	17.2925	6	6	6	16.6	16.6	16.6	24.732	9	0	RP2
GUK1	Guanylate kinase	Guanylate kinase;Guanylate kinase;Guanylate kinase (Fragment);Guanylate kinase;Guanylate kinase;Guanylate kinase (Fragment);Guanylate kinase (Fragment)	Q16774;B1ANH5;B1ANH0;B1ANG9;B1ANH6;B1ANH2;B1ANH3	Q16774;B1ANH5;B1ANH0;B1ANG9;B1ANH6;B1ANH2;B1ANH3	21.725	23.6678	NaN	5	5	5	39.6	39.6	39.6	23.746	7	0	GUK1
CASP7	Caspase-7;Caspase-7 subunit p20;Caspase-7 subunit p11	Caspase-7;Caspase-7;Caspase-7 (Fragment)	P55210;A0A0A0MRL7;Q5SVL2	P55210;A0A0A0MRL7;Q5SVL2	34.276	23.6646	NaN	13	13	13	55.1	55.1	55.1	226.01	17	0	CASP7
UAP1L1	UDP-N-acetylhexosamine pyrophosphorylase-like protein 1	UDP-N-acetylhexosamine pyrophosphorylase-like protein 1	Q3KQV9;A0A087X226	Q3KQV9	57.03	23.6641	NaN	22	22	20	54	54	49.9	55.107	17	0	UAP1L1
UBXN1	UBX domain-containing protein 1	UBX domain-containing protein 1;UBX domain-containing protein 1;UBX domain-containing protein 1;UBX domain-containing protein 1 (Fragment)	A0A087WTZ5;E9PRQ7;Q04323;E9PJ81	A0A087WTZ5;E9PRQ7;Q04323;E9PJ81	27.015	23.6564	NaN	6	6	6	37.8	37.8	37.8	33.349	6	0	UBXN1
TBCB	Tubulin-folding cofactor B	Tubulin-folding cofactor B;Tubulin-folding cofactor B (Fragment);Tubulin-folding cofactor B	Q99426;K7EP07;K7EK42;K7EL99	Q99426;K7EP07;K7EK42	27.325	23.6536	NaN	14	14	14	66.4	66.4	66.4	32.95	13	0	TBCB
TNFSF10	Tumor necrosis factor ligand superfamily member 10	Tumor necrosis factor ligand superfamily member 10	P50591	P50591	32.509	23.6535	21.1804	9	9	9	31.3	31.3	31.3	39.529	11	5	TNFSF10
EIF2S1	Eukaryotic translation initiation factor 2 subunit 1	Eukaryotic translation initiation factor 2 subunit 1;Eukaryotic translation initiation factor 2 subunit 1 (Fragment);Eukaryotic translation initiation factor 2 subunit 1 (Fragment)	P05198;G3V4T5;H0YJS4	P05198;G3V4T5;H0YJS4	36.112	23.6425	17.0194	12	12	12	47	47	47	75.327	14	0	EIF2S1
RAB4A	Ras-related protein Rab-4A	Ras-related protein Rab-4A	P20338	P20338	24.389	23.6415	15.8147	13	13	5	72.5	72.5	23.9	42.392	10	0	RAB4A
MB	Myoglobin	Myoglobin;Myoglobin;Myoglobin (Fragment);Myoglobin (Fragment)	P02144;Q8WVH6;B0QYF8;F2Z2F1;B0QYF7;F2Z337	P02144;Q8WVH6;B0QYF8;F2Z2F1	17.184	23.6385	NaN	12	12	12	73.4	73.4	73.4	31.444	11	0	MB
MADD	MAP kinase-activating death domain protein	MAP kinase-activating death domain protein;MAP kinase-activating death domain protein	A0A0A0MRB5;Q8WXG6;F8W8U2;C9JLZ9;C9K0L0;A0A0U1RR25;C9JM97;C9J6B0	A0A0A0MRB5;Q8WXG6	176.55	23.6312	NaN	32	32	32	31	31	31	301.78	43	0	MADD
TACC1	Transforming acidic coiled-coil-containing protein 1	Transforming acidic coiled-coil-containing protein 1;Transforming acidic coiled-coil-containing protein 1;Transforming acidic coiled-coil-containing protein 1;Transforming acidic coiled-coil-containing protein 1 (Fragment)	O75410;E7EVI4;E7ET87;H0YAY0;R4GMT7;B4E3H6;H0YBT8;E5RFM9;E5RJU4;E5RJG6	O75410;E7EVI4;E7ET87;H0YAY0	87.793	23.6209	15.3239	28	24	24	42	41	41	118.72	28	0	TACC1
PDCD5	Programmed cell death protein 5	Programmed cell death protein 5;Programmed cell death protein 5	O14737;K7EQA1;K7ESJ4;Q3HM38;X6R2P6	O14737;K7EQA1	14.285	23.6185	NaN	10	10	10	66.4	66.4	66.4	37.29	13	0	PDCD5
PROSC	Proline synthase co-transcribed bacterial homolog protein	Pyridoxal phosphate homeostasis protein;Pyridoxal phosphate homeostasis protein (Fragment);Pyridoxal phosphate homeostasis protein (Fragment)	O94903;E5RG77;E5RFX7;H0YBG2;E5RFZ4	O94903;E5RG77;E5RFX7	30.344	23.6089	NaN	7	7	7	30.9	30.9	30.9	14.153	5	0	PROSC
RPL3	60S ribosomal protein L3	60S ribosomal protein L3;60S ribosomal protein L3;60S ribosomal protein L3 (Fragment)	P39023;G5E9G0;H7C422;H7C3M2;B5MCW2;F8WCR1;Q92901	P39023;G5E9G0;H7C422	46.108	23.6037	16.102	17	17	17	41.7	41.7	41.7	50.717	8	0	RPL3
GARS	Glycine--tRNA ligase	Glycine--tRNA ligase	P41250	P41250	83.165	23.6009	15.6453	21	21	21	35.5	35.5	35.5	87.945	23	0	GARS
AKAP12	A-kinase anchor protein 12	A-kinase anchor protein 12	Q02952	Q02952	191.48	23.5968	NaN	52	52	52	45.3	45.3	45.3	323.31	53	0	AKAP12
IFT27	Intraflagellar transport protein 27 homolog	Intraflagellar transport protein 27 homolog;Intraflagellar transport protein 27 homolog (Fragment);Intraflagellar transport protein 27 homolog (Fragment)	Q9BW83;F5GZ09;H0Y6C7;B1AH58	Q9BW83;F5GZ09;H0Y6C7	20.48	23.5965	NaN	6	6	6	39.8	39.8	39.8	38.483	7	0	IFT27
GGACT	Gamma-glutamylaminecyclotransferase	Gamma-glutamylaminecyclotransferase	Q9BVM4;M0R217;M0R0M3	Q9BVM4	17.328	23.5935	NaN	8	8	8	68.6	68.6	68.6	60.281	4	0	GGACT
UMAD1	UBAP1-MVB12-associated (UMA)-domain containing protein 1	UBAP1-MVB12-associated (UMA)-domain containing protein 1	C9J7I0;A0A1B0GUC2;A0A1W2PP33	C9J7I0	15.2	23.5876	23.3617	7	7	7	43.1	43.1	43.1	90.045	5	3	UMAD1
APOD	Apolipoprotein D	Apolipoprotein D;Apolipoprotein D (Fragment)	P05090;C9JF17;C9JX71	P05090;C9JF17	21.275	23.5867	22.929	9	9	9	41.3	41.3	41.3	107.08	3	5	APOD
AIMP1	Aminoacyl tRNA synthase complex-interacting multifunctional protein 1;Endothelial monocyte-activating polypeptide 2	Aminoacyl tRNA synthase complex-interacting multifunctional protein 1	Q12904;D6R937	Q12904	34.352	23.5851	17.7467	10	10	10	38.8	38.8	38.8	56.867	12	0	AIMP1
AK1	Adenylate kinase isoenzyme 1	Adenylate kinase isoenzyme 1;Adenylate kinase isoenzyme 1	Q5T9B7;P00568;H0YID2	Q5T9B7;P00568	23.411	23.5842	20.7617	12	12	12	65.2	65.2	65.2	66.518	10	3	AK1
CRK	Adapter molecule crk	Adapter molecule crk;Adapter molecule crk	P46108;I3L297	P46108;I3L297	33.83	23.5837	NaN	10	10	10	46.4	46.4	46.4	27.609	9	0	CRK
FAM84B	Protein FAM84B	Protein FAM84B	Q96KN1	Q96KN1	34.474	23.5801	NaN	9	9	9	47.4	47.4	47.4	49.041	10	0	FAM84B
SUGT1	Suppressor of G2 allele of SKP1 homolog	Protein SGT1 homolog	Q9Y2Z0	Q9Y2Z0	41.024	23.5781	NaN	12	12	12	44.1	44.1	44.1	30.685	10	0	SUGT1
PITHD1	PITH domain-containing protein 1	PITH domain-containing protein 1	Q9GZP4;X6R8S9	Q9GZP4	24.178	23.577	15.1911	11	11	11	51.2	51.2	51.2	38.877	9	0	PITHD1
VPS25	Vacuolar protein-sorting-associated protein 25	Vacuolar protein-sorting-associated protein 25;Vacuolar protein-sorting-associated protein 25 (Fragment)	Q9BRG1;K7EKV4;K7ENE3;K7EP45	Q9BRG1;K7EKV4	20.747	23.5747	NaN	11	11	11	68.2	68.2	68.2	34.924	8	0	VPS25
SEPTIN7	Septin-7	Septin-7;Septin-7;Septin-7;Septin-7	E7ES33;E7EPK1;Q16181;G3V1Q4;Q5JXL7;A0A0U1RRM2;A0A0U1RRE1;A0A0U1RRH9;A0A0U1RRD1;Q6ZU15	E7ES33;E7EPK1;Q16181;G3V1Q4	48.715	23.5686	NaN	20	20	20	50.6	50.6	50.6	68.52	19	0	SEPTIN7
TMOD3	Tropomodulin-3	Tropomodulin-3;Tropomodulin-3 (Fragment);Tropomodulin-3	Q9NYL9;H0YKU1;H0YNJ8;G5EA42;Q9NZR1	Q9NYL9;H0YKU1;H0YNJ8	39.594	23.5671	NaN	10	10	10	37.2	37.2	37.2	24.832	12	0	TMOD3
HRAS	GTPase HRas;GTPase HRas, N-terminally processed	GTPase HRas	P01112	P01112	21.298	23.5656	NaN	12	4	4	80.4	27	27	8.8621	8	0	HRAS
KIAA1671	Uncharacterized protein KIAA1671	Uncharacterized protein KIAA1671;Uncharacterized protein KIAA1671	A0A1B0GVJ7;Q9BY89	A0A1B0GVJ7;Q9BY89	44.073	23.5607	NaN	8	8	8	27.9	27.9	27.9	122.82	13	0	KIAA1671
MVB12A	Multivesicular body subunit 12A	Multivesicular body subunit 12A;Multivesicular body subunit 12A	Q96EY5;E9PQA6;M0QZK6;E9PLZ8;E9PLL0;E9PJW8	Q96EY5;E9PQA6	28.783	23.5504	24.1406	19	19	19	74.4	74.4	74.4	173.95	5	12	MVB12A
NIT1	Nitrilase homolog 1	Deaminated glutathione amidase	Q86X76	Q86X76	35.896	23.5472	NaN	11	11	11	50.2	50.2	50.2	58.904	12	0	NIT1
ARHGAP1	Rho GTPase-activating protein 1	Rho GTPase-activating protein 1;Rho GTPase-activating protein 1 (Fragment);Rho GTPase-activating protein 1 (Fragment)	Q07960;H0YE29;E9PNR6	Q07960;H0YE29;E9PNR6	50.435	23.5411	15.742	17	17	17	39.2	39.2	39.2	50.334	16	0	ARHGAP1
RDX	Radixin	Radixin;Radixin;Radixin	P35241;A0A2R8Y5S7;A0A2R8Y7M3;A0A2R8Y4H6	P35241;A0A2R8Y5S7;A0A2R8Y7M3	68.563	23.5352	19.0271	39	25	22	46.8	31.2	26.8	164.25	22	3	RDX
MAPK3	Mitogen-activated protein kinase 3;Mitogen-activated protein kinase	Mitogen-activated protein kinase 3;Mitogen-activated protein kinase;Mitogen-activated protein kinase;Mitogen-activated protein kinase;Mitogen-activated protein kinase 3	P27361;E9PQW4;E9PJF0;E9PBK7;B3KR49;H0YEX6;E9PRH7;H0YDH9;K7ELV1;K7EN18;P31152;Q16659	P27361;E9PQW4;E9PJF0;E9PBK7;B3KR49	43.135	23.5283	NaN	18	13	13	49.6	39.3	39.3	38.109	12	0	MAPK3
ACO1	Cytoplasmic aconitate hydratase	Cytoplasmic aconitate hydratase	P21399	P21399	98.398	23.5279	14.9288	36	36	36	49	49	49	115.04	20	0	ACO1
RRAS2	Ras-related protein R-Ras2	Ras-related protein R-Ras2;Ras-related protein R-Ras2 (Fragment)	P62070;E9PK85;E9PQK5;E9PQC5;E9PQ87	P62070;E9PK85	23.399	23.525	17.2915	11	8	8	56.9	51.5	51.5	27.292	6	0	RRAS2
PDCD4	Programmed cell death protein 4	Programmed cell death protein 4	Q53EL6;Q5VZS7	Q53EL6	51.735	23.5235	17.4627	15	15	15	41.2	41.2	41.2	65.558	9	1	PDCD4
ENTPD2	Ectonucleoside triphosphate diphosphohydrolase 2	Ectonucleoside triphosphate diphosphohydrolase 2	Q9Y5L3	Q9Y5L3	53.665	23.523	22.1831	11	11	11	24	24	24	51.734	7	4	ENTPD2
YARS	Tyrosine--tRNA ligase, cytoplasmic;Tyrosine--tRNA ligase, cytoplasmic, N-terminally processed	Tyrosine--tRNA ligase, cytoplasmic	P54577;A0A0C4DGZ5	P54577	59.143	23.5218	15.9791	24	24	24	53.4	53.4	53.4	75.185	18	0	YARS
RPL30	60S ribosomal protein L30	60S ribosomal protein L30 (Fragment);60S ribosomal protein L30	E5RI99;P62888;A0A0B4J213;A0A0C4DH44;E5RJH3	E5RI99;P62888	12.656	23.5111	18.0063	7	7	7	65.8	65.8	65.8	28.604	5	1	RPL30
MRI1	Methylthioribose-1-phosphate isomerase	Methylthioribose-1-phosphate isomerase	Q9BV20	Q9BV20	39.149	23.5087	NaN	15	15	15	50.1	50.1	50.1	76.54	15	0	MRI1
TECPR1	Tectonin beta-propeller repeat-containing protein 1	Tectonin beta-propeller repeat-containing protein 1	Q7Z6L1;C9JEV4;C9J2A1;C9JUV4	Q7Z6L1	129.69	23.5058	16.2142	21	21	21	28.9	28.9	28.9	95.247	29	0	TECPR1
CPNE4	Copine-4	Copine-4	Q96A23;D6RCT2;D6RI99;D6RFY4;E7ENV7;Q8IYJ1;O95741;Q86YQ8;Q9HCH3;Q9UBL6	Q96A23	62.394	23.5042	NaN	21	20	20	47.4	47.4	47.4	64.385	19	0	CPNE4
EIF3I	Eukaryotic translation initiation factor 3 subunit I	Eukaryotic translation initiation factor 3 subunit I	Q13347;Q5TFK1	Q13347	36.501	23.5005	NaN	11	11	11	52.9	52.9	52.9	52.796	13	0	EIF3I
OPLAH	5-oxoprolinase	5-oxoprolinase	O14841;A0A087WY99	O14841	137.46	23.499	14.3149	32	32	32	35.1	35.1	35.1	245.41	28	0	OPLAH
DCTN5	Dynactin subunit 5	Dynactin subunit 5;Dynactin subunit 5;Dynactin subunit 5;Dynactin subunit 5	Q9BTE1;H3BR94;H3BUD2;H3BS05;I3L0U8	Q9BTE1;H3BR94;H3BUD2;H3BS05	20.126	23.4911	NaN	5	5	5	22	22	22	19.097	5	0	DCTN5
NUBP1	Cytosolic Fe-S cluster assembly factor NUBP1	Cytosolic Fe-S cluster assembly factor NUBP1;Cytosolic Fe-S cluster assembly factor NUBP1 (Fragment)	P53384;I3L531;I3L3A0;I3L518	P53384;I3L531	34.534	23.4903	NaN	8	8	8	36.9	36.9	36.9	52.343	8	0	NUBP1
ABHD17B	Alpha/beta hydrolase domain-containing protein 17B	Alpha/beta hydrolase domain-containing protein 17B	Q5VST6	Q5VST6	32.214	23.4866	NaN	9	9	9	48.6	48.6	48.6	43.499	10	0	ABHD17B
RPL11	60S ribosomal protein L11	60S ribosomal protein L11;60S ribosomal protein L11	P62913;Q5VVC8	P62913;Q5VVC8	20.252	23.4757	18.314	9	9	9	51.1	51.1	51.1	24.694	5	1	RPL11
EIF5	Eukaryotic translation initiation factor 5	Eukaryotic translation initiation factor 5	P55010;H0YLZ1;H0YN40;H0YK11;H0YMJ8;H0YM54;H0YK29	P55010	49.222	23.4744	17.4334	15	15	15	30.6	30.6	30.6	39.025	14	1	EIF5
CPNE1	Copine-1	Copine-1;Copine-1 (Fragment);Copine-1;Copine-1;Copine-1;Copine-1 (Fragment);Copine-1 (Fragment);Copine-1 (Fragment);Copine-1 (Fragment);Copine-1 (Fragment)	Q99829;F2Z2V0;B0QZ18;A6PVH9;E7ENH5;Q5JX56;Q5JX58;Q5JX59;Q5JX60;Q5JX44;Q5JX55;Q5JX45;Q5JX61;Q5JX52;Q5JX54;Q5JX57;E7EV27;Q5JX53;H0Y524	Q99829;F2Z2V0;B0QZ18;A6PVH9;E7ENH5;Q5JX56;Q5JX58;Q5JX59;Q5JX60;Q5JX44	59.058	23.4658	NaN	11	11	11	28.9	28.9	28.9	104.41	9	0	CPNE1
CCDC6	Coiled-coil domain-containing protein 6	Coiled-coil domain-containing protein 6	Q16204	Q16204	53.29	23.4573	NaN	15	15	15	41.8	41.8	41.8	91.266	16	0	CCDC6
FLOT1	Flotillin-1	Flotillin-1;Flotillin-1 (Fragment);Flotillin-1 (Fragment);Flotillin-1 (Fragment);Flotillin-1 (Fragment)	O75955;A0A140T9R1;A0A140T9W4;A0A140T9X0;A2AB09;A0A140T907;A2AB10;A0A140T959;A0A140T974;A2AB12;A0A140T905;A2ABJ5;A0A140T9C3;A2AB13;A2AB11;A0A0G2JJQ6	O75955;A0A140T9R1;A0A140T9W4;A0A140T9X0;A2AB09	47.355	23.4415	NaN	14	14	14	30.7	30.7	30.7	43.84	9	0	FLOT1
PPCS	Phosphopantothenate--cysteine ligase	Phosphopantothenate--cysteine ligase	Q9HAB8;Q5VVM3	Q9HAB8	34.005	23.4392	NaN	9	9	9	36	36	36	38.094	9	0	PPCS
LAMP2	Lysosome-associated membrane glycoprotein 2	Lysosome-associated membrane glycoprotein 2;Lysosome-associated membrane glycoprotein 2 (Fragment)	P13473;H0YCG2	P13473;H0YCG2	44.96	23.4361	15.5971	7	7	7	14.9	14.9	14.9	14.927	7	0	LAMP2
NHLRC2	NHL repeat-containing protein 2	NHL repeat-containing protein 2	Q8NBF2	Q8NBF2	79.443	23.4335	NaN	11	11	11	20.1	20.1	20.1	44.715	9	0	NHLRC2
SYTL3	Synaptotagmin-like protein 3	Synaptotagmin-like protein 3	Q4VX76	Q4VX76	68.559	23.4301	NaN	23	23	23	48.5	48.5	48.5	108.57	21	0	SYTL3
PLEKHB2	Pleckstrin homology domain-containing family B member 2	Pleckstrin homology domain-containing family B member 2;Pleckstrin homology domain-containing family B member 2;Pleckstrin homology domain-containing family B member 2;Pleckstrin homology domain-containing family B member 2	A0A0A0MSE9;B7WPA5;Q96CS7;A0A0A0MSI4	A0A0A0MSE9;B7WPA5;Q96CS7;A0A0A0MSI4	26.335	23.4284	17.4653	9	9	9	44.1	44.1	44.1	31.012	3	1	PLEKHB2
RPL9	60S ribosomal protein L9	60S ribosomal protein L9;60S ribosomal protein L9 (Fragment);60S ribosomal protein L9 (Fragment);60S ribosomal protein L9	P32969;E7ESE0;D6RAN4;A0A2R8Y5Y7;H0Y9R4;H0Y9V9	P32969;E7ESE0;D6RAN4;A0A2R8Y5Y7	21.863	23.4283	NaN	9	9	9	40.1	40.1	40.1	25.187	7	0	RPL9
BIN3	Bridging integrator 3	Bridging integrator 3;Bridging integrator 3	Q9NQY0;H7BYV6;E5RHU4;A0A1W2PS11;E5RJI6;E5RGB5	Q9NQY0;H7BYV6	29.665	23.4248	19.4431	12	12	12	57.3	57.3	57.3	18.115	6	0	BIN3
NEDD4L	E3 ubiquitin-protein ligase NEDD4-like	E3 ubiquitin-protein ligase NEDD4-like;E3 ubiquitin-protein ligase NEDD4-like	Q96PU5;A0A1B0GVY1;K7ERN1;K7ENS6;K7EKL1	Q96PU5;A0A1B0GVY1	111.93	23.4176	16.472	27	27	27	37	37	37	127.15	35	1	NEDD4L
KIF2A	Kinesin-like protein KIF2A	Kinesin-like protein KIF2A	O00139;H0Y8H2;Q99661	O00139	79.954	23.4074	14.6239	31	31	15	42.5	42.5	22.2	122.86	30	0	KIF2A
PDIA3	Protein disulfide-isomerase A3	Protein disulfide-isomerase A3	P30101	P30101	56.782	23.4012	21.3017	22	22	17	49.7	49.7	40	96.615	21	7	PDIA3
ERH	Enhancer of rudimentary homolog	Enhancer of rudimentary homolog;Enhancer of rudimentary homolog	P84090;G3V279	P84090;G3V279	12.259	23.399	NaN	4	4	4	55.8	55.8	55.8	12.207	4	0	ERH
KLK11	Kallikrein-11;Kallikrein-11 inactive chain 1;Kallikrein-11 inactive chain 2	Kallikrein-11;Kallikrein-11 (Fragment);Kallikrein-11 (Fragment)	Q9UBX7;M0QZI8;M0QZV0;A0A0A0MR55;M0R151;M0QYW4	Q9UBX7;M0QZI8;M0QZV0	31.059	23.3966	19.6084	7	7	7	27.7	27.7	27.7	21.078	4	1	KLK11
FAM63A	Protein FAM63A	Ubiquitin carboxyl-terminal hydrolase MINDY-1	Q8N5J2;H0YJH5	Q8N5J2	51.777	23.3953	NaN	6	6	6	20.7	20.7	20.7	32.548	7	0	FAM63A
ADRM1	Proteasomal ubiquitin receptor ADRM1	Proteasomal ubiquitin receptor ADRM1	Q16186;A0A087WX59;A0A087WUX6	Q16186	42.153	23.3922	NaN	7	7	7	21.1	21.1	21.1	49.019	3	0	ADRM1
BROX	BRO1 domain-containing protein BROX	BRO1 domain-containing protein BROX;BRO1 domain-containing protein BROX;BRO1 domain-containing protein BROX (Fragment)	Q5VW32;F5GXQ0;Q5VW33	Q5VW32;F5GXQ0;Q5VW33	46.476	23.3919	NaN	14	14	14	40.1	40.1	40.1	57.608	10	1	BROX
RPS17	40S ribosomal protein S17	Uncharacterized protein;40S ribosomal protein S17;40S ribosomal protein S17;40S ribosomal protein S17	H3BNC9;P08708;H0YN88;A0A075B716;H0YN73;A0A0J9YYC4	H3BNC9;P08708;H0YN88;A0A075B716	64.532	23.3852	NaN	9	9	9	14.7	14.7	14.7	44.036	10	0	RPS17
DYNC1LI1	Cytoplasmic dynein 1 light intermediate chain 1	Cytoplasmic dynein 1 light intermediate chain 1;Cytoplasmic dynein 1 light intermediate chain 1	Q9Y6G9;E9PHI6;C9JGM7;C9JLW1	Q9Y6G9;E9PHI6	56.578	23.3838	NaN	23	23	23	50.5	50.5	50.5	93.209	24	0	DYNC1LI1
CAMP	Cathelicidin antimicrobial peptide;Antibacterial protein FALL-39;Antibacterial protein LL-37	Cathelicidin antimicrobial peptide;Cathelicidin antimicrobial peptide	J3KNB4;P49913	J3KNB4;P49913	19.591	23.3766	24.5576	11	11	11	53.8	53.8	53.8	49.169	4	10	CAMP
LPL	Lipoprotein lipase	Lipoprotein lipase	P06858;E5RJI0;E5RHN7	P06858	53.162	23.375	26.9115	36	36	27	57.3	57.3	40.2	226.74	10	42	LPL
UBE2Z	Ubiquitin-conjugating enzyme E2 Z	Ubiquitin-conjugating enzyme E2 Z	Q9H832;I3L286;H0Y9X8;D6RB11	Q9H832	38.21	23.3681	NaN	8	8	8	27.7	27.7	27.7	32.94	8	0	UBE2Z
G6PD	Glucose-6-phosphate 1-dehydrogenase	Glucose-6-phosphate 1-dehydrogenase	P11413;E9PD92;E7EM57;E7EUI8	P11413	59.256	23.3577	NaN	20	20	20	47.8	47.8	47.8	50.636	12	0	G6PD
SNX12	Sorting nexin-12	Sorting nexin-12;Sorting nexin-12	A0A087X0R6;Q9UMY4	A0A087X0R6;Q9UMY4	19.825	23.3518	NaN	7	7	7	54.7	54.7	54.7	24.45	10	0	SNX12
AIP	AH receptor-interacting protein	AH receptor-interacting protein;Peptidylprolyl isomerase (Fragment)	O00170;E9PMH2;V9GYQ3	O00170;E9PMH2	37.636	23.3507	NaN	15	15	15	58.8	58.8	58.8	39.866	11	0	AIP
LYPLAL1	Lysophospholipase-like protein 1	Lysophospholipase-like protein 1	Q5VWZ2	Q5VWZ2	26.316	23.3472	18.2587	8	8	8	38.8	38.8	38.8	31.719	3	1	LYPLAL1
SLC30A4	Zinc transporter 4	Zinc transporter 4	O14863	O14863	47.482	23.3416	NaN	7	7	7	19.8	19.8	19.8	82.334	10	0	SLC30A4
TARS	Threonine--tRNA ligase, cytoplasmic	Threonine--tRNA ligase, cytoplasmic	P26639;D6R9F8;D6RCA5;D6RDJ6;D6RJ97;D6RHV7;D6RCS6	P26639	83.434	23.3403	15.8343	27	27	25	43.3	43.3	39.7	70.806	22	0	TARS
PRMT5	Protein arginine N-methyltransferase 5;Protein arginine N-methyltransferase 5, N-terminally processed	Protein arginine N-methyltransferase 5 (Fragment);Protein arginine N-methyltransferase 5 (Fragment);Protein arginine N-methyltransferase 5;Protein arginine N-methyltransferase 5 (Fragment);Protein arginine N-methyltransferase 5 (Fragment);Protein arginine	G3V580;G3V2L6;O14744;C9JSX3;G3V5L5;G3V2X6;G3V507;G3V2F5	G3V580;G3V2L6;O14744;C9JSX3;G3V5L5;G3V2X6	20.375	23.3352	NaN	6	6	6	52.2	52.2	52.2	15.446	6	0	PRMT5
RPS10	40S ribosomal protein S10	40S ribosomal protein S10;RPS10-NUDT3 readthrough (Fragment);40S ribosomal protein S10;40S ribosomal protein S10;40S ribosomal protein S10	P46783;A0A2R8Y6L3;F6U211;A0A2R8Y7H1;A0A2R8YFH6;Q9NQ39	P46783;A0A2R8Y6L3;F6U211;A0A2R8Y7H1;A0A2R8YFH6	18.898	23.3266	NaN	5	5	2	33.3	33.3	14.5	13.078	5	0	RPS10
PTPN11	Tyrosine-protein phosphatase non-receptor type 11	Tyrosine-protein phosphatase non-receptor type 11	Q06124;A0A0U1RRI0;A0A1W2PPU4;H0YF12	Q06124	68.436	23.3257	16.1415	20	20	20	34.7	34.7	34.7	71.242	19	0	PTPN11
ZC3HAV1	Zinc finger CCCH-type antiviral protein 1	Zinc finger CCCH-type antiviral protein 1;Zinc finger CCCH-type antiviral protein 1	C9J6P4;Q7Z2W4;H7C5K1	C9J6P4;Q7Z2W4	114.08	23.3098	NaN	32	32	32	36.4	36.4	36.4	260.23	30	0	ZC3HAV1
YKT6	Synaptobrevin homolog YKT6	Synaptobrevin homolog YKT6	O15498	O15498	22.417	23.3095	NaN	9	9	9	48	48	48	25.813	7	0	YKT6
SH3GLB1	Endophilin-B1	Endophilin-B1;Endophilin-B1	A0A087WW40;Q9Y371	A0A087WW40;Q9Y371	44.26	23.3079	NaN	11	11	11	37.1	37.1	37.1	34.26	7	0	SH3GLB1
RPS2	40S ribosomal protein S2	40S ribosomal protein S2 (Fragment);40S ribosomal protein S2;40S ribosomal protein S2	H0YEN5;P15880;E9PQD7;I3L404;E9PM36;E9PMM9;E9PPT0;H3BNG3;H0YE27	H0YEN5;P15880;E9PQD7	21.154	23.3067	17.7328	8	8	8	43.6	43.6	43.6	14.858	5	0	RPS2
PA2G4	Proliferation-associated protein 2G4	Proliferation-associated protein 2G4	Q9UQ80;F8VR77;F8W0A3;H0YIN7	Q9UQ80	43.786	23.3062	16.1703	20	20	20	56.9	56.9	56.9	108.01	9	0	PA2G4
TPM1		Tropomyosin alpha-1 chain;Tropomyosin 1 (Alpha), isoform CRA_m;Tropomyosin alpha-1 chain;Tropomyosin 1 (Alpha), isoform CRA_b;Tropomyosin alpha-1 chain	F5H7S3;H7BYY1;B7Z596;H0YKJ4;H0YK48;H0YK20;H0YL42;H0YN06	F5H7S3;H7BYY1;B7Z596;H0YKJ4;H0YK48	28.524	23.3048	NaN	18	9	4	56.3	36.3	15.5	15.385	9	0	TPM1
EIF4E	Eukaryotic translation initiation factor 4E	Eukaryotic translation initiation factor 4E;Eukaryotic translation initiation factor 4E;Eukaryotic translation initiation factor 4E (Fragment)	D6RBW1;P06730;H0Y8J7;D6RHE2;H0Y8X3	D6RBW1;P06730;H0Y8J7	28.512	23.2897	17.5465	8	8	7	24.1	24.1	24.1	17.89	8	0	EIF4E
TYMP	Thymidine phosphorylase	Thymidine phosphorylase;Thymidine phosphorylase (Fragment)	P19971;C9JGI3;A0A1W2PP80;A0A1W2PQK0	P19971;C9JGI3	49.955	23.2888	NaN	15	15	15	47.9	47.9	47.9	36.632	11	0	TYMP
STXBP5	Syntaxin-binding protein 5	Syntaxin-binding protein 5	Q5T5C0;H0Y332;Q5JRH0;Q3B794	Q5T5C0	127.57	23.287	15.7464	21	21	21	26.3	26.3	26.3	89.471	17	0	STXBP5
CDV3	Protein CDV3 homolog	Protein CDV3 homolog	Q9UKY7;D6RFH2;D6R9V8;H0Y8K3;D6RAV0;D6RDN0	Q9UKY7	27.335	23.2869	NaN	5	5	5	47.3	47.3	47.3	124.5	9	0	CDV3
GPS1	COP9 signalosome complex subunit 1	COP9 signalosome complex subunit 1;COP9 signalosome complex subunit 1;COP9 signalosome complex subunit 1;COP9 signalosome complex subunit 1;COP9 signalosome complex subunit 1;COP9 signalosome complex subunit 1 (Fragment);COP9 signalosome complex subunit 1	C9JFE4;A0A096LP07;A0A096LPJ3;A8K070;Q13098;J3KSA5;J3QLT0;J3KRJ4;J3QS84;J3QS88;J3KTB0;J3QLE8;J3QL53;J3KRE8;J3QQX0	C9JFE4;A0A096LP07;A0A096LPJ3;A8K070;Q13098;J3KSA5;J3QLT0;J3KRJ4	53.371	23.2825	17.4097	8	8	8	19.1	19.1	19.1	26.636	7	1	GPS1
PPP5C	Serine/threonine-protein phosphatase;Serine/threonine-protein phosphatase 5	Serine/threonine-protein phosphatase (Fragment);Serine/threonine-protein phosphatase 5;Serine/threonine-protein phosphatase	H0YDU8;P53041;A8MU39;M0R196;A0A087WY80;E7EU14	H0YDU8;P53041;A8MU39	55.096	23.2768	NaN	13	13	13	31.1	31.1	31.1	41.763	13	0	PPP5C
LGALS3BP	Galectin-3-binding protein	Galectin-3-binding protein;Galectin-3-binding protein (Fragment)	Q08380;K7EP36;K7ESM3;K7EKQ5;K7ERZ6;K7EJD3;K7ES75;K7EN99;K7EJY8;K7EQT9	Q08380;K7EP36	65.33	23.2689	27.5442	28	28	28	42.6	42.6	42.6	196.95	7	44	LGALS3BP
MSN	Moesin	Moesin	P26038;V9GZ54	P26038	67.819	23.2659	13.763	36	22	22	52.5	35.2	35.2	105.61	24	0	MSN
CNN2	Calponin;Calponin-2	Calponin;Calponin;Calponin-2;Calponin (Fragment);Calponin-2;Calponin (Fragment)	B4DDF4;B4DUT8;Q99439;A0A087X271;K7ES69;H3BVI6;A0A087X1X5;A0A087WV51;H3BQH0	B4DDF4;B4DUT8;Q99439;A0A087X271;K7ES69;H3BVI6	32.616	23.2644	NaN	8	8	8	46.3	46.3	46.3	35.094	7	0	CNN2
ATP8A1	Phospholipid-transporting ATPase IA	Phospholipid-transporting ATPase IA	Q9Y2Q0;Q4G1C1;H0YAA1;F8W9B3;F8VRS1;Q9NTI2	Q9Y2Q0	131.37	23.261	15.7068	30	30	30	31.9	31.9	31.9	116.16	23	0	ATP8A1
C16orf13	UPF0585 protein C16orf13	Methyltransferase-like 26;Methyltransferase-like 26 (Fragment);Methyltransferase-like 26;Methyltransferase-like 26;Methyltransferase-like 26 (Fragment);Methyltransferase-like 26 (Fragment);Methyltransferase-like 26 (Fragment);Methyltransferase-like 26 (Fra	H3BS73;H3BNB2;A0A087WYU2;Q96S19;H3BRT2;H3BQ55;H3BNT3;H3BMF3	H3BS73;H3BNB2;A0A087WYU2;Q96S19;H3BRT2;H3BQ55;H3BNT3;H3BMF3	11.138	23.251	NaN	3	3	3	39.8	39.8	39.8	15.297	5	0	C16orf13
DCTN6	Dynactin subunit 6	Dynactin subunit 6	O00399;E5RK00	O00399	20.747	23.2446	16.8305	4	4	4	39.5	39.5	39.5	19.72	3	0	DCTN6
CCDC64B	Bicaudal D-related protein 2	BICD family-like cargo adapter 2;BICD family-like cargo adapter 2	A0A2R8Y2X6;A1A5D9	A0A2R8Y2X6;A1A5D9	60.717	23.2406	16.5025	21	21	21	49.9	49.9	49.9	50.285	22	0	CCDC64B
STXBP6	Syntaxin-binding protein 6	Syntaxin-binding protein 6	Q8NFX7;F8VZZ2	Q8NFX7	23.554	23.2389	NaN	6	6	6	41	41	41	10.285	6	0	STXBP6
RPLP0	60S acidic ribosomal protein P0;60S acidic ribosomal protein P0-like	60S acidic ribosomal protein P0 (Fragment);60S acidic ribosomal protein P0;60S acidic ribosomal protein P0 (Fragment);60S acidic ribosomal protein P0;60S acidic ribosomal protein P0;60S acidic ribosomal protein P0-like;60S acidic ribosomal protein P0;60S a	F8VU65;P05388;F8VPE8;G3V210;F8VWS0;Q8NHW5;F8VQY6;F8VRK7;F8VW21;F8VWV4;F8VS58;F8VZS0	F8VU65;P05388;F8VPE8;G3V210;F8VWS0;Q8NHW5;F8VQY6;F8VRK7;F8VW21;F8VWV4;F8VS58;F8VZS0	27.187	23.2377	NaN	10	10	10	44.1	44.1	44.1	21.511	5	0	RPLP0
C11orf52	Uncharacterized protein C11orf52	Uncharacterized protein C11orf52	Q96A22;E9PPX5	Q96A22	13.92	23.2343	22.2355	9	9	9	82.1	82.1	82.1	23.477	6	5	C11orf52
GSTM3	Glutathione S-transferase Mu 3	Glutathione S-transferase Mu 3;Glutathione S-transferase	P21266;A0A0A0MTN3	P21266;A0A0A0MTN3	26.559	23.2244	NaN	16	15	15	58.7	58.7	58.7	49.867	9	0	GSTM3
MVD	Diphosphomevalonate decarboxylase	Diphosphomevalonate decarboxylase;Diphosphomevalonate decarboxylase (Fragment);Diphosphomevalonate decarboxylase	P53602;H3BP35;H3BQ47;H3BRZ1;H3BVC4	P53602;H3BP35;H3BQ47	43.404	23.222	NaN	9	9	9	40.5	40.5	40.5	84.7	7	0	MVD
CARKD	ATP-dependent (S)-NAD(P)H-hydrate dehydratase	ATP-dependent (S)-NAD(P)H-hydrate dehydratase	Q8IW45	Q8IW45	36.576	23.219	NaN	15	15	15	59.4	59.4	59.4	40.455	10	0	CARKD
DCTPP1	dCTP pyrophosphatase 1	dCTP pyrophosphatase 1	Q9H773;H3BPN2;H3BSA6	Q9H773	18.681	23.2069	NaN	5	5	5	57.1	57.1	57.1	21.07	5	0	DCTPP1
GIPC1	PDZ domain-containing protein GIPC1	PDZ domain-containing protein GIPC1;PDZ domain-containing protein GIPC1 (Fragment)	O14908;K7ESN1;K7EM11	O14908;K7ESN1	36.049	23.2065	NaN	6	6	6	17.1	17.1	17.1	11.427	6	0	GIPC1
TGM2	Protein-glutamine gamma-glutamyltransferase 2	Protein-glutamine gamma-glutamyltransferase 2	P21980;A2A299;A2A2A0	P21980	77.328	23.201	15.3663	17	17	17	30.1	30.1	30.1	64.067	16	1	TGM2
DNM2	Dynamin-2	Dynamin-2	P50570;K7EMQ3;E5RHK8;A0A0D9SFB1;A0A0U1RQP1;A0A0D9SFE4;Q05193;Q9UQ16;A0A1B0GUX5;A0A1B0GU67;E5RIK2;K7EPK9;H7C5U0	P50570	98.063	23.1951	NaN	31	31	31	41.8	41.8	41.8	155.44	24	0	DNM2
MVK	Mevalonate kinase	Mevalonate kinase;Mevalonate kinase;Mevalonate kinase (Fragment)	F5H8H2;Q03426;A0A1B0GWC2;F5GXC0;F5H092;F5H163;F5H368;A0A1W2PS16;A0A0B4J236;A0A1B0GWF3	F5H8H2;Q03426;A0A1B0GWC2	37.171	23.1907	NaN	10	10	10	49.4	49.4	49.4	54.015	11	0	MVK
IMPDH2	Inosine-5-monophosphate dehydrogenase 2	Inosine-5-monophosphate dehydrogenase 2;Inosine-5-monophosphate dehydrogenase 2 (Fragment)	P12268;H0Y4R1;E7ETK5	P12268;H0Y4R1	55.804	23.1873	NaN	18	18	17	49	49	47.5	133.22	18	0	IMPDH2
DPYS	Dihydropyrimidinase	Dihydropyrimidinase	Q14117;E5RG28	Q14117	56.629	23.1701	NaN	16	15	15	41.2	39.9	39.9	64.686	12	0	DPYS
GNB2L1	Guanine nucleotide-binding protein subunit beta-2-like 1;Guanine nucleotide-binding protein subunit beta-2-like 1, N-terminally processed	Receptor of activated protein C kinase 1;Receptor of-activated protein C kinase 1;Receptor of-activated protein C kinase 1;Receptor of-activated protein C kinase 1;Receptor of-activated protein C kinase 1 (Fragment);Receptor of-activated protein C kinase 1	P63244;D6RHH4;J3KPE3;D6RAC2;H0Y8W2;D6RFX4;H0YAF8;D6R9Z1;H0YAM7;D6R9L0;D6REE5;D6RBD0;H0Y8R5;D6RAU2;E9PD14;D6RFZ9;D6RF23;D6RGK8;H0Y9P0;D6R909;D6RHJ5	P63244;D6RHH4;J3KPE3;D6RAC2;H0Y8W2;D6RFX4;H0YAF8;D6R9Z1;H0YAM7;D6R9L0;D6REE5;D6RBD0;H0Y8R5	35.076	23.1661	19.707	12	12	12	40.1	40.1	40.1	43.465	7	1	GNB2L1
HDHD1	Pseudouridine-5-phosphatase	Pseudouridine-5-phosphatase (Fragment);Pseudouridine-5-phosphatase	E7EVH9;Q08623	E7EVH9;Q08623	21.466	23.1646	NaN	7	7	7	65.4	65.4	65.4	39.82	4	0	HDHD1
PRKAA1	5-AMP-activated protein kinase catalytic subunit alpha-1	5-AMP-activated protein kinase catalytic subunit alpha-1	Q13131;Q96E92	Q13131	64.009	23.1594	NaN	17	17	15	42.8	42.8	36.7	43.692	17	0	PRKAA1
VBP1	Prefoldin subunit 3	Prefoldin subunit 3;Prefoldin subunit 3	P61758;B4DWR3	P61758;B4DWR3	22.658	23.1578	NaN	11	11	11	51.8	51.8	51.8	38.183	9	0	VBP1
CIAO1	Probable cytosolic iron-sulfur protein assembly protein CIAO1	Probable cytosolic iron-sulfur protein assembly protein CIAO1	O76071	O76071	37.84	23.1565	18.7011	10	10	10	35.1	35.1	35.1	34.376	7	0	CIAO1
ADK	Adenosine kinase	Adenosine kinase	P55263	P55263	40.545	23.155	NaN	14	14	14	40.9	40.9	40.9	78.656	11	0	ADK
CAST	Calpastatin	Calpastatin;Calpastatin (Fragment);Calpastatin;Calpastatin;cDNA FLJ56123, highly similar to Calpastatin;Calpastatin;Calpastatin;Calpastatin (Fragment);Calpastatin (Fragment);Calpastatin (Fragment)	A0A0C4DGB5;E7ES10;E9PCH5;E7EVY3;B7Z574;P20810;E9PDE4;D6RGF7;D6RBR1;H0Y944;E7EN75;H0Y9H6;H0Y7F0;E7EQ12;E7EQK6;A0A0A0MR45;E7EQA0;H0YD33;D6RAA8;D6RC54	A0A0C4DGB5;E7ES10;E9PCH5;E7EVY3;B7Z574;P20810;E9PDE4;D6RGF7;D6RBR1;H0Y944	80.998	23.1467	NaN	21	21	6	36.9	36.9	14.5	107.42	29	0	CAST
LZTFL1	Leucine zipper transcription factor-like protein 1	Leucine zipper transcription factor-like protein 1;Leucine zipper transcription factor-like protein 1 (Fragment)	Q9NQ48;H7C488;C9J0R9	Q9NQ48;H7C488	34.592	23.1456	17.1662	7	7	7	35.8	35.8	35.8	17.278	5	0	LZTFL1
TPMT	Thiopurine S-methyltransferase	Thiopurine S-methyltransferase	P51580	P51580	28.18	23.1403	NaN	10	10	10	38.4	38.4	38.4	21.985	6	0	TPMT
GRB2	Growth factor receptor-bound protein 2	Growth factor receptor-bound protein 2	P62993;J3KT38;J3QRL5	P62993	25.206	23.1401	NaN	10	10	10	46.5	46.5	46.5	32.979	7	0	GRB2
ACTR1B	Beta-centractin	Beta-centractin	P42025	P42025	42.293	23.137	NaN	14	7	7	50.8	28.2	28.2	58.938	7	0	ACTR1B
CAND1	Cullin-associated NEDD8-dissociated protein 1	Cullin-associated NEDD8-dissociated protein 1	Q86VP6;A0A0C4DGH5;H0YH27;A0A3B3ISC4;F8WBB8;O75155;F5H6I6	Q86VP6	136.37	23.1211	15.8019	25	25	25	29.3	29.3	29.3	70.525	17	1	CAND1
RPS15A	40S ribosomal protein S15a	40S ribosomal protein S15a;40S ribosomal protein S15a;40S ribosomal protein S15a;Uncharacterized protein (Fragment)	I3L3P7;P62244;I3L246;H3BN98;H3BV27;H3BT37;I3L303;H3BVC7	I3L3P7;P62244;I3L246;H3BN98	11.477	23.1143	18.518	10	10	10	75	75	75	22.83	4	0	RPS15A
MAP2K4	Dual specificity mitogen-activated protein kinase kinase 4	Dual specificity mitogen-activated protein kinase kinase 4	P45985;R4GN37	P45985	44.287	23.1141	NaN	14	14	14	44.4	44.4	44.4	59.135	13	0	MAP2K4
PNKD	Probable hydrolase PNKD	Probable hydrolase PNKD	Q8N490	Q8N490	42.875	23.1047	17.5492	6	6	6	28.8	28.8	28.8	33.922	5	0	PNKD
CTNNB1	Catenin beta-1	Catenin beta-1;Catenin beta-1;Catenin beta-1 (Fragment);Catenin beta-1;Catenin beta-1;Catenin beta-1;Catenin beta-1;Catenin beta-1;Catenin beta-1;Catenin beta-1	A0A2R8Y804;A0A2R8Y543;A0A2R8YCH5;A0A2R8Y5A3;P35222;A0A2R8Y5Z1;B4DGU4;A0A2R8Y7Z0;A0A2R8Y750;A0A2R8Y5C3;A0A2R8Y6G0;E7EMJ5;A0A2R8Y815;A0A2R8YG06;E9PDF9;E7EV28	A0A2R8Y804;A0A2R8Y543;A0A2R8YCH5;A0A2R8Y5A3;P35222;A0A2R8Y5Z1;B4DGU4;A0A2R8Y7Z0;A0A2R8Y750;A0A2R8Y5C3	77.206	23.1044	NaN	19	19	17	38.6	38.6	34.8	120.58	16	0	CTNNB1
PRPSAP2	Phosphoribosyl pyrophosphate synthase-associated protein 2	Phosphoribosyl pyrophosphate synthase-associated protein 2;Phosphoribosyl pyrophosphate synthase-associated protein 2 (Fragment)	O60256;I3L0S1;E7EPA1;C9K0K7;C9JJS3;C9JDU5;C9JDH0;I3L4G9;E7EW35;I3L331;I3L164	O60256;I3L0S1	40.925	23.1023	NaN	15	15	14	39	39	35.2	50.463	9	0	PRPSAP2
GALK2	N-acetylgalactosamine kinase	N-acetylgalactosamine kinase;N-acetylgalactosamine kinase;N-acetylgalactosamine kinase (Fragment)	B7ZAX5;Q01415;H0YLL8;H0YLL3;H0YK30;H0YK10	B7ZAX5;Q01415;H0YLL8	47.635	23.0974	16.0829	9	9	9	38	38	38	38.998	7	0	GALK2
LRSAM1	E3 ubiquitin-protein ligase LRSAM1	E3 ubiquitin-protein ligase LRSAM1	Q6UWE0	Q6UWE0	83.593	23.0954	NaN	33	33	33	56.3	56.3	56.3	153.25	19	0	LRSAM1
ACE	Angiotensin-converting enzyme;Angiotensin-converting enzyme, soluble form	Angiotensin-converting enzyme;Angiotensin-converting enzyme;Angiotensin-converting enzyme	A0A0A0MSN4;P12821;F6X3S4;J3KTB8;J3KTH9;J3KSQ5;J3KS28;J3QRX8;J3QLR4	A0A0A0MSN4;P12821;F6X3S4	142.42	23.083	22.7728	34	34	34	24.7	24.7	24.7	120.32	12	18	ACE
TPP1	Tripeptidyl-peptidase 1	Tripeptidyl-peptidase 1;Tripeptidyl-peptidase 1 (Fragment);Tripeptidyl-peptidase 1;Tripeptidyl-peptidase 1	O14773;A0A2R8Y7U1;A0A2R8YD45;A0A2R8YGD1;A0A2R8YE64;E7EV34;A0A2R8Y7I4;A0A2R8YD72;A0A2R8YDY1	O14773;A0A2R8Y7U1;A0A2R8YD45;A0A2R8YGD1	61.247	23.077	19.6272	11	11	11	36.6	36.6	36.6	58.089	6	3	TPP1
LSAMP	Limbic system-associated membrane protein	Limbic system-associated membrane protein;Limbic system-associated membrane protein (Fragment);Limbic system-associated membrane protein	F5H5G1;H3BLU2;Q13449;C9J5G3	F5H5G1;H3BLU2;Q13449	31.741	23.0767	NaN	7	7	7	29.2	29.2	29.2	56.257	8	0	LSAMP
SOD3	Extracellular superoxide dismutase [Cu-Zn]	Extracellular superoxide dismutase [Cu-Zn]	P08294;M0R1V4	P08294	25.851	23.0715	21.8246	7	7	7	39.6	39.6	39.6	43.194	1	4	SOD3
BIN1	Myc box-dependent-interacting protein 1	Myc box-dependent-interacting protein 1	O00499;S4R418;A0A0A0MT10;A0A087X188;Q9UBW5;P49418	O00499	64.699	23.0679	NaN	16	16	16	38.1	38.1	38.1	70.667	18	0	BIN1
TMC5	Transmembrane channel-like protein;Transmembrane channel-like protein 5	Transmembrane channel-like protein;Transmembrane channel-like protein 5	F5GYU8;Q6UXY8;H3BN68	F5GYU8;Q6UXY8	108.92	23.0632	21.9075	19	19	19	21.8	21.8	21.8	112.96	18	15	TMC5
NAT1	Arylamine N-acetyltransferase 1	Arylamine N-acetyltransferase 1;Arylamine N-acetyltransferase 1	P18440;F5H5R8	P18440;F5H5R8	33.898	23.0599	16.0947	11	11	11	40	40	40	97.837	8	0	NAT1
USO1	General vesicular transport factor p115	General vesicular transport factor p115	O60763	O60763	107.89	23.0578	16.148	17	17	17	23.2	23.2	23.2	126.89	15	0	USO1
AHNAK	Neuroblast differentiation-associated protein AHNAK	Neuroblast differentiation-associated protein AHNAK	Q09666;E9PKR9;E9PLK4;E9PJZ0;E9PJC6;E9PQE3	Q09666	629.09	23.0574	13.0999	143	143	143	50.6	50.6	50.6	323.31	170	0	AHNAK
EPN1	Epsin-1	Epsin-1	Q9Y6I3	Q9Y6I3	60.293	23.0495	NaN	9	9	7	24.8	24.8	22.4	60.931	6	0	EPN1
EIF3J	Eukaryotic translation initiation factor 3 subunit J	Eukaryotic translation initiation factor 3 subunit J;Eukaryotic translation initiation factor 3 subunit J (Fragment);Eukaryotic translation initiation factor 3 subunit J (Fragment)	O75822;H0YLP3;H0YGJ7	O75822;H0YLP3;H0YGJ7	29.062	23.049	NaN	8	8	8	38	38	38	33.3	8	0	EIF3J
CAT	Catalase	Catalase	P04040	P04040	59.755	23.0454	NaN	14	14	14	34	34	34	66.779	13	0	CAT
PTPRJ	Protein-tyrosine-phosphatase;Receptor-type tyrosine-protein phosphatase eta	Receptor-type tyrosine-protein phosphatase eta;Receptor-type tyrosine-protein phosphatase eta;Receptor-type tyrosine-protein phosphatase eta	A0A087WTK0;A0A087WVC6;Q12913;E9PPH3;E9PJ83	A0A087WTK0;A0A087WVC6;Q12913	146.07	23.045	19.8909	28	28	28	24.5	24.5	24.5	156.16	24	5	PTPRJ
PSMB5	Proteasome subunit beta type-5	Proteasome subunit beta type-5	P28074;H0YJM8;G8JLC2;G3V3K3	P28074	28.48	23.0437	16.9908	9	9	9	37.3	37.3	37.3	24.164	7	0	PSMB5
MAP2K1	Dual specificity mitogen-activated protein kinase kinase 1	Dual specificity mitogen-activated protein kinase kinase 1	Q02750;H3BRW9	Q02750	43.439	23.0428	NaN	19	9	9	46.6	29.3	29.3	66.711	9	0	MAP2K1
COPG1	Coatomer subunit gamma-1	Coatomer subunit gamma-1	Q9Y678;H0Y8X7;H0Y8G2;D6RG17	Q9Y678	97.717	23.0403	15.9868	27	27	25	48.2	48.2	45.3	183.52	15	0	COPG1
PGM2	Phosphoglucomutase-2	Phosphoglucomutase-2	Q96G03;E7ENQ8;E9PD70	Q96G03	68.283	23.035	NaN	13	13	13	33.8	33.8	33.8	52.529	12	0	PGM2
ZDHHC20	Probable palmitoyltransferase ZDHHC20;Palmitoyltransferase	Palmitoyltransferase ZDHHC20;Palmitoyltransferase	Q5W0Z9;B4DRN8;A0A0D9SEN4	Q5W0Z9;B4DRN8	42.277	23.0195	NaN	5	5	5	15.3	15.3	15.3	53.256	6	0	ZDHHC20
COPA	Coatomer subunit alpha;Xenin;Proxenin	Coatomer subunit alpha;Coatomer subunit alpha;Coatomer subunit alpha (Fragment);Coatomer subunit alpha;Coatomer subunit alpha (Fragment);Coatomer subunit alpha	P53621;A0A3B3IS84;A0A3B3ISC6;A0A3B3IT15;A0A3B3IU89;A0A3B3ITV3;A0A3B3ISK1;A0A3B3ITI7;A0A3B3IU78;A0A3B3IU84;A0A3B3IS23;A0A3B3ITX2	P53621;A0A3B3IS84;A0A3B3ISC6;A0A3B3IT15;A0A3B3IU89;A0A3B3ITV3	138.34	23.0118	16.2303	38	38	38	40.5	40.5	40.5	146.53	22	1	COPA
DDX19A	ATP-dependent RNA helicase DDX19A	ATP-dependent RNA helicase DDX19A;ATP-dependent RNA helicase DDX19A;ATP-dependent RNA helicase DDX19A (Fragment)	Q9NUU7;I3L0H8;I3L352;H3BTB3;J3QRH0;H3BSL8;H0YD26;A0A1B0GV69;E9PR46;J3QL17;Q9UHL0	Q9NUU7;I3L0H8;I3L352	53.974	23.0092	15.4252	16	16	1	42.3	42.3	2.3	78.508	13	0	DDX19A
ARPC1A	Actin-related protein 2/3 complex subunit 1A	Actin-related protein 2/3 complex subunit 1A	Q92747	Q92747	41.569	23.0091	NaN	16	6	6	48.9	15.9	15.9	61.997	6	0	ARPC1A
IAH1	Isoamyl acetate-hydrolyzing esterase 1 homolog	Isoamyl acetate-hydrolyzing esterase 1 homolog;Isoamyl acetate-hydrolyzing esterase 1 homolog (Fragment)	Q2TAA2;H7C5G1;C9JDY4;C9J5J2;C9JE02;F8WF34	Q2TAA2;H7C5G1	27.598	23.0064	NaN	9	9	9	38.7	38.7	38.7	52.12	4	0	IAH1
ABI2	Abl interactor 2	Abl interactor 2;Abl interactor 2 (Fragment);Abl interactor 2;Abl interactor 2;Abl interactor 2;Abl interactor 2;cDNA FLJ51162, highly similar to Abl interactor 2	E7EW77;E7EP65;A0A0C4DG21;F8WAL6;Q9NYB9;E9PEZ7;B7Z836;H0Y6B5;F8WBL5;F8WEB9;H7C3Q7;E7EUA1;F8WAU3;F8WCD7;F8WAZ8	E7EW77;E7EP65;A0A0C4DG21;F8WAL6;Q9NYB9;E9PEZ7;B7Z836	52.789	23.0059	NaN	13	9	9	31	24.2	24.2	28.586	12	0	ABI2
RPL10A	60S ribosomal protein L10a	60S ribosomal protein L10a	P62906	P62906	24.831	23.0041	15.9807	7	7	7	34.6	34.6	34.6	17.976	3	0	RPL10A
TBC1D4	TBC1 domain family member 4	TBC1 domain family member 4;TBC1 domain family member 4	O60343;A0A3B3IRT3;Q5JU47	O60343;A0A3B3IRT3	146.56	22.9998	NaN	32	32	32	31.4	31.4	31.4	90.235	29	0	TBC1D4
FLOT2	Flotillin-2	Flotillin-2;Flotillin-2;Flotillin-2	J3QLD9;E7EMK3;Q14254;K7EKW9	J3QLD9;E7EMK3;Q14254	47.142	22.9972	NaN	20	20	20	44.2	44.2	44.2	56.931	14	0	FLOT2
ETF1	Eukaryotic peptide chain release factor subunit 1	Eukaryotic peptide chain release factor subunit 1;Eukaryotic peptide chain release factor subunit 1	P62495;B7Z7P8;D6RCB3;I3L492;D6RJE8	P62495;B7Z7P8	49.03	22.9918	NaN	8	8	8	24	24	24	37.103	3	0	ETF1
EPS8L1	Epidermal growth factor receptor kinase substrate 8-like protein 1	Epidermal growth factor receptor kinase substrate 8-like protein 1;cDNA FLJ60287, highly similar to Epidermal growth factor receptor kinase substrate 8-like protein 1;EPS8-like 1, isoform CRA_d;Epidermal growth factor receptor kinase substrate 8-like prote	Q8TE68;B4DKV7;K7EN83;K7EKX9;K7ELW3	Q8TE68;B4DKV7;K7EN83;K7EKX9	80.25	22.9869	20.1837	20	20	20	33.6	33.6	33.6	61.446	14	4	EPS8L1
CRKL	Crk-like protein	Crk-like protein	P46109	P46109	33.777	22.978	NaN	8	8	8	37	37	37	17.091	8	0	CRKL
GNAO1	Guanine nucleotide-binding protein G(o) subunit alpha	Guanine nucleotide-binding protein G(o) subunit alpha;Guanine nucleotide-binding protein G(o) subunit alpha;Guanine nucleotide-binding protein G(o) subunit alpha;Guanine nucleotide-binding protein G(o) subunit alpha (Fragment)	P09471;A0A1W2PRJ7;A0A1W2PS82;H3BTM2;A0A1W2PRE1;A0A1W2PQK2;A0A087WTB6;A0A1W2PP87;A0A1W2PP38	P09471;A0A1W2PRJ7;A0A1W2PS82;H3BTM2	40.05	22.9716	NaN	12	6	6	38.1	28.8	28.8	33.384	10	0	GNAO1
PYCRL	Pyrroline-5-carboxylate reductase;Pyrroline-5-carboxylate reductase 3	Pyrroline-5-carboxylate reductase;Pyrroline-5-carboxylate reductase 3;Pyrroline-5-carboxylate reductase 3	A0A0A0MQS1;Q53H96;B5MD87;F8WEI0	A0A0A0MQS1;Q53H96;B5MD87	29.892	22.9709	NaN	9	9	9	40.2	40.2	40.2	36.819	6	0	PYCRL
RPL6	60S ribosomal protein L6	60S ribosomal protein L6	Q02878;F8VR69;F8VZ45;U3KQR5	Q02878	32.728	22.968	18.1112	5	5	5	23.6	23.6	23.6	15.276	8	0	RPL6
FNBP1L	Formin-binding protein 1-like	Formin-binding protein 1-like;Formin-binding protein 1-like;Formin-binding protein 1-like (Fragment)	S4R347;Q5T0N5;A0A075B6Q2	S4R347;Q5T0N5;A0A075B6Q2	70.525	22.967	NaN	17	17	17	29.2	29.2	29.2	36.737	20	0	FNBP1L
COPS6	COP9 signalosome complex subunit 6	COP9 signalosome complex subunit 6;COP9 signalosome complex subunit 6	E7EM64;Q7L5N1;H7C3T0	E7EM64;Q7L5N1	36.064	22.9641	18.9512	6	6	6	29.1	29.1	29.1	35.34	9	0	COPS6
COPE	Coatomer subunit epsilon	Coatomer protein complex, subunit epsilon, isoform CRA_g;Coatomer subunit epsilon;Coatomer subunit epsilon	M0QXB4;O14579;M0R061	M0QXB4;O14579;M0R061	36.923	22.9571	16.299	9	9	9	39.9	39.9	39.9	47.966	7	1	COPE
GALT	Galactose-1-phosphate uridylyltransferase	Galactose-1-phosphate uridylyltransferase;Galactose-1-phosphate uridylyltransferase;Galactose-1-phosphate uridylyltransferase;Galactose-1-phosphate uridylyltransferase;Uncharacterized protein (Fragment)	P07902;G3V3U5;G3V223;F2Z2X9;G3V4G9;H0YJL3	P07902;G3V3U5;G3V223;F2Z2X9;G3V4G9	43.363	22.955	NaN	9	9	9	35.4	35.4	35.4	26.137	9	0	GALT
PSM8	Proteasome subunit beta type;Proteasome subunit beta type-8	Proteasome subunit beta;Proteasome subunit beta type-8;Proteasome subunit beta type-8;Proteasome subunit beta type-8	X5D2R7;P28062;Q5JNW7;A0A140T998	X5D2R7;P28062;Q5JNW7;A0A140T998	30.354	22.929	NaN	7	7	7	44.9	44.9	44.9	22.377	5	0	PSM8
RPL15	60S ribosomal protein L15;Ribosomal protein L15	60S ribosomal protein L15;Ribosomal protein L15 (Fragment);Ribosomal protein L15 (Fragment);Ribosomal protein L15 (Fragment)	P61313;A0A2R8YEM3;E7EQV9;E7ENU7;E7ERA2;A0A2R8Y738	P61313;A0A2R8YEM3;E7EQV9;E7ENU7	24.146	22.9266	17.7298	9	9	6	48.5	48.5	30.9	27.027	6	0	RPL15
RUVBL2	RuvB-like 2	RuvB-like 2;RuvB-like helicase	Q9Y230;M0R0Y3;X6R2L4;M0R0Z0;M0QXI6;M0QXZ7;A0A1W2PS48	Q9Y230;M0R0Y3	51.156	22.9198	NaN	18	18	18	52.9	52.9	52.9	59.144	13	0	RUVBL2
STAM2	Signal transducing adapter molecule 2	Signal transducing adapter molecule 2	O75886	O75886	58.164	22.9191	NaN	9	9	7	26.7	26.7	23	62.971	9	0	STAM2
KLC3	Kinesin light chain 3	Kinesin light chain 3;Kinesin light chain 3 (Fragment)	Q6P597;K7EL76;K7ENJ3;K7ELP9	Q6P597;K7EL76	55.364	22.9088	17.7183	17	15	15	41.3	41.3	41.3	40.326	13	1	KLC3
PURB	Transcriptional activator protein Pur-beta	Transcriptional activator protein Pur-beta	Q96QR8;Q9UJV8	Q96QR8	33.24	22.9085	NaN	15	12	12	63.1	56.7	56.7	35.748	4	0	PURB
ARPC1B	Actin-related protein 2/3 complex subunit 1B	Actin-related protein 2/3 complex subunit 1B	O15143	O15143	40.949	22.9033	NaN	17	4	4	54	16.7	16.7	30.579	6	0	ARPC1B
CLIP1	CAP-Gly domain-containing linker protein 1	CAP-Gly domain-containing linker protein 1;CAP-Gly domain-containing linker protein 1;CAP-Gly domain-containing linker protein 1 (Fragment);CAP-Gly domain-containing linker protein 1 (Fragment)	P30622;J3KP58;F5H0N7;A0A3B3ITA2;F5H6A0;F5H1T5;A0A3B3ISJ8;F5H367;F5H270;A0A3B3IS27	P30622;J3KP58;F5H0N7;A0A3B3ITA2	162.24	22.8952	NaN	49	49	48	41.8	41.8	40.8	177.25	45	0	CLIP1
UAP1	UDP-N-acetylhexosamine pyrophosphorylase;UDP-N-acetylgalactosamine pyrophosphorylase;UDP-N-acetylglucosamine pyrophosphorylase	UDP-N-acetylhexosamine pyrophosphorylase	Q16222	Q16222	58.768	22.894	15.4099	17	15	15	37.5	33.5	33.5	37.401	13	0	UAP1
FKBP15	Peptidyl-prolyl cis-trans isomerase;FK506-binding protein 15	Peptidylprolyl isomerase (Fragment);FK506-binding protein 15	A0A0A0MT60;Q5T1M5;X6RKW4	A0A0A0MT60;Q5T1M5	136.27	22.8906	15.7963	33	33	33	35.5	35.5	35.5	207.45	25	0	FKBP15
MLST8	Target of rapamycin complex subunit LST8	Target of rapamycin complex subunit LST8;Target of rapamycin complex subunit LST8;Target of rapamycin complex subunit LST8;Target of rapamycin complex subunit LST8;Target of rapamycin complex subunit LST8;Target of rapamycin complex subunit LST8 (Fragment)	A0A0A0MR05;Q9BVC4;H3BM50;H3BPU5;H3BPT1;H3BN58;H3BSZ4;H3BR25;H3BR38;H3BQ74;I3L2E7	A0A0A0MR05;Q9BVC4;H3BM50;H3BPU5;H3BPT1;H3BN58;H3BSZ4;H3BR25;H3BR38	36.039	22.8891	NaN	6	6	6	29.4	29.4	29.4	18.25	8	0	MLST8
PHACTR4	Phosphatase and actin regulator 4	Phosphatase and actin regulator 4	Q8IZ21;A0A0J9YVR0;A0A0J9YWV8	Q8IZ21	78.21	22.8746	15.3616	13	13	13	29.9	29.9	29.9	27.094	12	0	PHACTR4
WASH3P	Putative WAS protein family homolog 3;WAS protein family homolog 2;WAS protein family homolog 1;Putative WAS protein family homolog 4	Putative WAS protein family homolog 3;WAS protein family homolog 2;WASH complex subunit 1;Putative WAS protein family homolog 4	C4AMC7;Q6VEQ5;A8K0Z3;A8MWX3	C4AMC7;Q6VEQ5;A8K0Z3;A8MWX3	49.994	22.8722	17.7922	14	14	4	31.3	31.3	9.1	39.182	10	0	WASH3P
THAP4	THAP domain-containing protein 4	THAP domain-containing protein 4;THAP domain-containing protein 4	Q8WY91;B5MCC0	Q8WY91;B5MCC0	62.889	22.8681	NaN	5	5	5	14.7	14.7	14.7	15.403	8	0	THAP4
ERP44	Endoplasmic reticulum resident protein 44	Endoplasmic reticulum resident protein 44	Q9BS26	Q9BS26	46.971	22.8564	19.5034	9	9	9	30	30	30	48.629	7	5	ERP44
EXOC8	Exocyst complex component 8	Exocyst complex component 8	Q8IYI6	Q8IYI6	81.798	22.8557	NaN	13	13	13	24.1	24.1	24.1	92.428	16	0	EXOC8
RHOQ	Rho-related GTP-binding protein RhoQ	Rho-related GTP-binding protein RhoQ	P17081;F8WET9;E5RFZ3	P17081	22.659	22.8517	16.2927	6	5	5	34.1	28.8	28.8	42.691	5	0	RHOQ
PAK4	Serine/threonine-protein kinase PAK 4	Serine/threonine-protein kinase PAK 4	O96013;M0R2X4;M0R1R1;M0R0L9;M0R3G6;Q9P286	O96013	64.071	22.8427	NaN	17	17	17	44.2	44.2	44.2	48.458	14	0	PAK4
DCTN4	Dynactin subunit 4	Dynactin subunit 4	Q9UJW0;E5RGG1;H9KVE0;E5RI97;E5RK21	Q9UJW0	52.337	22.8304	NaN	10	10	10	28.9	28.9	28.9	42.836	10	0	DCTN4
STUB1	E3 ubiquitin-protein ligase CHIP	E3 ubiquitin-protein ligase CHIP;E3 ubiquitin-protein ligase CHIP (Fragment)	Q9UNE7;H3BS86;H3BTA3;H3BUD0	Q9UNE7;H3BS86	34.856	22.8192	NaN	15	15	15	61.7	61.7	61.7	45.358	5	0	STUB1
LANCL1	LanC-like protein 1	LanC-like protein 1 (Fragment);LanC-like protein 1	E9PHS0;O43813;F8WDS9	E9PHS0;O43813	22.042	22.8192	NaN	7	7	7	66.3	66.3	66.3	26.689	3	0	LANCL1
GSTT2B	Glutathione S-transferase theta-2B;Glutathione S-transferase theta-2	Em:AP000351.3 protein;Glutathione S-transferase theta-2B;Glutathione S-transferase theta-2;Glutathione S-transferase theta-2	Q6ICJ4;P0CG30;P0CG29;A0A087WY67	Q6ICJ4;P0CG30;P0CG29;A0A087WY67	25.948	22.8168	NaN	7	7	7	41.3	41.3	41.3	34.961	3	0	GSTT2B
SNX3	Sorting nexin-3	Sorting nexin-3	O60493	O60493	18.762	22.8049	NaN	7	7	7	38.9	38.9	38.9	9.6634	5	0	SNX3
ENAH	Protein enabled homolog	Protein enabled homolog;Protein enabled homolog;Protein enabled homolog (Fragment)	Q8N8S7;A0A0U1RRM6;A0A075B6E5;A0A0U1RQP7	Q8N8S7;A0A0U1RRM6;A0A075B6E5	66.509	22.8037	14.9575	11	11	10	25.2	25.2	23.7	43.262	14	0	ENAH
CLTB	Clathrin light chain B	Clathrin light chain B	P09497;H0Y9Q6;D6RJD1	P09497	25.19	22.8027	NaN	6	6	6	21.4	21.4	21.4	12.586	4	0	CLTB
CYFIP1	Cytoplasmic FMR1-interacting protein 1	Cytoplasmic FMR1-interacting protein 1;Cytoplasmic FMR1-interacting protein 1 (Fragment);Cytoplasmic FMR1-interacting protein 1 (Fragment)	Q7L576;A0A0G2JR96;A0A0G2JQT1;H7C229;E7EW33;A0A0G2JRX2;A0A087WU52;A0A0G2JRV9;A0A087WWL1;H0YL50	Q7L576;A0A0G2JR96;A0A0G2JQT1	145.18	22.7885	13.386	27	27	15	26.1	26.1	15.7	93.235	27	1	CYFIP1
SLPI	Antileukoproteinase	Antileukoproteinase	P03973	P03973	14.326	22.7882	22.0817	7	7	7	53	53	53	15.673	6	2	SLPI
PSMD6	26S proteasome non-ATPase regulatory subunit 6	26S proteasome non-ATPase regulatory subunit 6	Q15008;C9J7B7;C9J0E9	Q15008	45.531	22.7827	18.1259	7	7	7	20.3	20.3	20.3	54.884	5	1	PSMD6
RNF114	E3 ubiquitin-protein ligase RNF114	E3 ubiquitin-protein ligase RNF114;E3 ubiquitin-protein ligase RNF114 (Fragment);E3 ubiquitin-protein ligase RNF114	Q9Y508;A0A096LNV3;A0A096LP02	Q9Y508;A0A096LNV3;A0A096LP02	25.694	22.7751	NaN	10	10	10	60.5	60.5	60.5	19.25	11	0	RNF114
TMC4	Transmembrane channel-like protein;Transmembrane channel-like protein 4	Transmembrane channel-like protein;Transmembrane channel-like protein;Transmembrane channel-like protein;Transmembrane channel-like protein;Transmembrane channel-like protein;Transmembrane channel-like protein;Transmembrane channel-like protein 4;Transmemb	A0A0G2JMP8;A0A0G2JMM6;A0A087WVI4;A0A0G2JPL6;A0A0G2JP95;A0A087WT65;Q7Z404;A0A0G2JNC6;C9JFU4	A0A0G2JMP8;A0A0G2JMM6;A0A087WVI4;A0A0G2JPL6;A0A0G2JP95;A0A087WT65;Q7Z404;A0A0G2JNC6	78.762	22.7734	20.5048	14	14	14	18.6	18.6	18.6	110.26	8	4	TMC4
GGPS1	Geranylgeranyl pyrophosphate synthase	Geranylgeranyl pyrophosphate synthase;Tubulin-specific chaperone E;Geranylgeranyl pyrophosphate synthase (Fragment);Geranylgeranyl pyrophosphate synthase (Fragment)	O95749;A0A2R8YE82;C9J6G3;C9J7M1;A0A2R8Y7P7	O95749;A0A2R8YE82;C9J6G3;C9J7M1	34.87	22.7725	NaN	7	7	7	21.3	21.3	21.3	20.858	6	0	GGPS1
RABEP1	Rab GTPase-binding effector protein 1	Rab GTPase-binding effector protein 1	Q15276;K7ENJ9;I3L2B8;I3L456;A0A087WZZ3	Q15276	99.289	22.7665	NaN	27	27	27	34.5	34.5	34.5	97.766	27	0	RABEP1
CADPS2	Calcium-dependent secretion activator 2	Calcium-dependent secretion activator 2;Calcium-dependent secretion activator 2;Calcium-dependent secretion activator 2;Calcium-dependent secretion activator 2	C9IYE1;Q86UW7;F8W8P5;A0A087X1P3;H7BYR4	C9IYE1;Q86UW7;F8W8P5;A0A087X1P3	147.58	22.7651	NaN	22	22	20	20.8	20.8	19.2	87.181	23	0	CADPS2
PDCD6	Programmed cell death protein 6	Programmed cell death protein 6;HCG1985580, isoform CRA_c	O75340;A0A024QZ42;H0Y9X3;A0A087WZ38	O75340;A0A024QZ42	21.868	22.7639	NaN	6	6	6	32.5	32.5	32.5	15.547	4	0	PDCD6
DMXL1	DmX-like protein 1	DmX-like protein 1;DmX-like protein 1	F5H269;Q9Y485;E7EMZ0	F5H269;Q9Y485	340.24	22.759	NaN	59	59	59	30	30	30	323.31	42	0	DMXL1
EEF1A2	Elongation factor 1-alpha 2	Elongation factor 1-alpha;Elongation factor 1-alpha 2	A0A2U3TZH3;Q05639;A0A2R8Y488;A0A2R8Y660;A0A2R8YDN5	A0A2U3TZH3;Q05639	54.34	22.7561	NaN	19	6	6	38.3	19.4	19.4	59.653	5	0	EEF1A2
SBDS	Ribosome maturation protein SBDS	Ribosome maturation protein SBDS;Ribosome maturation protein SBDS	A0A087X020;Q9Y3A5;F8WE72	A0A087X020;Q9Y3A5	28.864	22.7561	NaN	11	11	11	53.6	53.6	53.6	45.755	5	0	SBDS
UBE2K	Ubiquitin-conjugating enzyme E2 K	Ubiquitin-conjugating enzyme E2 K;Ubiquitin-conjugating enzyme E2 K (Fragment)	P61086;D6RDM7;D6RFX1	P61086;D6RDM7	22.406	22.7549	NaN	7	7	7	40.5	40.5	40.5	12.39	4	0	UBE2K
LTF	Lactotransferrin;Lactoferricin-H;Kaliocin-1;Lactoferroxin-A;Lactoferroxin-B;Lactoferroxin-C	Lactotransferrin;Lactotransferrin;Lactotransferrin (Fragment)	E7ER44;P02788;E7EQB2;C9JCF5;CON__Q29443;CON__Q0IIK2	E7ER44;P02788;E7EQB2	77.969	22.7513	24.9726	84	84	84	77.5	77.5	77.5	323.31	16	53	LTF
PSMD13	26S proteasome non-ATPase regulatory subunit 13	26S proteasome non-ATPase regulatory subunit 13;26S proteasome non-ATPase regulatory subunit 13;26S proteasome non-ATPase regulatory subunit 13	Q9UNM6;A0A087WUL9;J3KNQ3;H0YD73;E9PL38	Q9UNM6;A0A087WUL9;J3KNQ3	42.945	22.7461	NaN	11	11	11	37.2	37.2	37.2	26.135	8	0	PSMD13
RPS3	40S ribosomal protein S3	40S ribosomal protein S3;40S ribosomal protein S3;40S ribosomal protein S3;40S ribosomal protein S3;40S ribosomal protein S3 (Fragment);40S ribosomal protein S3 (Fragment);40S ribosomal protein S3 (Fragment)	P23396;E9PL09;E9PPU1;F2Z2S8;H0YCJ7;H0YEU2;H0YF32;E9PQ96;E9PJH4;E9PK82;E9PQX2;E9PSF4	P23396;E9PL09;E9PPU1;F2Z2S8;H0YCJ7;H0YEU2;H0YF32	26.688	22.7398	NaN	10	10	10	58	58	58	25.579	3	0	RPS3
SPINT2	Kunitz-type protease inhibitor 2	Kunitz-type protease inhibitor 2;Kunitz-type protease inhibitor 2 (Fragment);Kunitz-type protease inhibitor 2	O43291;K7EKQ0;K7EM91;K7ESI5	O43291;K7EKQ0;K7EM91	28.228	22.739	18.1175	5	5	4	26.2	26.2	21.4	37.855	3	1	SPINT2
SCRN2	Secernin-2	Secernin-2;Secernin-2;Secernin-2 (Fragment)	J3QL71;Q96FV2;J3QQM9;J3QRJ1;J3KT79;J3QR84	J3QL71;Q96FV2;J3QQM9	47.493	22.7373	NaN	5	5	5	22.6	22.6	22.6	39.179	7	0	SCRN2
TMEM63A	CSC1-like protein 1	CSC1-like protein 1	O94886;Q2HIZ8	O94886	92.125	22.7299	16.5254	8	8	8	19.7	19.7	19.7	43.579	10	0	TMEM63A
PSMD14	26S proteasome non-ATPase regulatory subunit 14	26S proteasome non-ATPase regulatory subunit 14	O00487;C9JW37	O00487	34.577	22.7248	NaN	4	4	4	30	30	30	22.594	6	0	PSMD14
PDLIM1	PDZ and LIM domain protein 1	PDZ and LIM domain protein 1	O00151	O00151	36.071	22.7246	NaN	6	6	6	32.8	32.8	32.8	44.242	5	0	PDLIM1
AGL	Glycogen debranching enzyme;4-alpha-glucanotransferase;Amylo-alpha-1,6-glucosidase	Glycogen debranching enzyme	P35573;A0A1C7CYW1	P35573	174.76	22.7156	16.6455	41	41	41	39	39	39	144.04	34	0	AGL
DDX1	ATP-dependent RNA helicase DDX1	ATP-dependent RNA helicase DDX1;ATP-dependent RNA helicase DDX1;ATP-dependent RNA helicase DDX1	Q92499;F1T0B3;A0A087X2G1	Q92499;F1T0B3;A0A087X2G1	82.431	22.7154	16.1017	25	25	25	46.5	46.5	46.5	89.223	24	0	DDX1
WIBG	Partner of Y14 and mago	Partner of Y14 and mago	Q9BRP8	Q9BRP8	22.655	22.7119	NaN	6	6	6	50	50	50	86.258	8	0	WIBG
NT5C2	Cytosolic purine 5-nucleotidase	Cytosolic purine 5-nucleotidase	P49902;Q5JUV6;Q5JUV4;S4R3A6;S4R3E7;Q5JUV3	P49902	64.969	22.7076	NaN	11	11	11	31.2	31.2	31.2	48.317	9	0	NT5C2
NT5DC1	5-nucleotidase domain-containing protein 1	5-nucleotidase domain-containing protein 1;5-nucleotidase domain-containing protein 1 (Fragment)	Q5TFE4;Q5QPD0	Q5TFE4;Q5QPD0	51.844	22.7058	NaN	12	12	12	40.4	40.4	40.4	42.018	8	0	NT5DC1
IGHA1	Ig alpha-1 chain C region	Immunoglobulin heavy constant alpha 1 (Fragment);Immunoglobulin heavy constant alpha 1;Immunoglobulin heavy constant alpha 2 (Fragment)	A0A286YEY1;P01876;A0A0G2JMB2;A0A286YEY5;P01877	A0A286YEY1;P01876;A0A0G2JMB2	42.848	22.7021	24.9771	16	16	16	51.3	51.3	51.3	89.256	6	22	IGHA1
SQSTM1	Sequestosome-1	Sequestosome-1;Sequestosome-1;Sequestosome-1 (Fragment)	Q13501;E7EMC7;E9PFW8;C9JRJ8;E3W990;D6RBF1;C9J6J8	Q13501;E7EMC7;E9PFW8	47.687	22.7003	NaN	10	10	10	42	42	42	94.722	14	0	SQSTM1
RAB22A	Ras-related protein Rab-22A	Ras-related protein Rab-22A	Q9UL26	Q9UL26	21.855	22.6986	NaN	8	8	6	58.8	58.8	47.4	29.654	6	0	RAB22A
CHORDC1	Cysteine and histidine-rich domain-containing protein 1	Cysteine and histidine-rich domain-containing protein 1;Cysteine and histidine-rich domain-containing protein 1;Cysteine and histidine-rich domain-containing protein 1;Cysteine and histidine-rich domain-containing protein 1	Q9UHD1;E9PIZ4;E9PSD5;E9PPQ5;E9PHZ2;E9PL00;E9PIF7	Q9UHD1;E9PIZ4;E9PSD5;E9PPQ5	37.489	22.697	NaN	7	7	7	26.8	26.8	26.8	13.604	4	0	CHORDC1
GBE1	1,4-alpha-glucan-branching enzyme	1,4-alpha-glucan-branching enzyme;1,4-alpha-glucan-branching enzyme	Q04446;E9PGM4	Q04446;E9PGM4	80.473	22.6967	NaN	8	8	8	16.8	16.8	16.8	26.48	7	0	GBE1
PRPS2	Ribose-phosphate pyrophosphokinase 2	Ribose-phosphate pyrophosphokinase 2	P11908;H7C540;D3YTJ7;A6NMS2	P11908	34.769	22.6908	16.7083	13	5	4	57.2	31.1	26.7	24.527	4	0	PRPS2
EIF2S2	Eukaryotic translation initiation factor 2 subunit 2	Eukaryotic translation initiation factor 2 subunit 2	P20042	P20042	38.388	22.69	NaN	12	12	12	34.2	34.2	34.2	22.611	11	0	EIF2S2
EEF1G	Elongation factor 1-gamma	Elongation factor 1-gamma	P26641	P26641	50.118	22.69	NaN	9	9	9	24	24	24	29.875	8	0	EEF1G
GNAI1	Guanine nucleotide-binding protein G(i) subunit alpha-1	Guanine nucleotide-binding protein G(i) subunit alpha-1	P63096;A0A3B3IUA8;A0A3B3ITM0;A0A3B3ITG4;A0A3B3IRK0;A0A3B3IU77;A0A3B3IS42;A0A3B3ITX3	P63096	40.361	22.6838	NaN	18	5	5	44.6	22.3	22.3	50.732	5	0	GNAI1
NMRAL1	NmrA-like family domain-containing protein 1	NmrA-like family domain-containing protein 1	Q9HBL8;I3L3Z0;I3L1Y8;I3L0Y6	Q9HBL8	33.344	22.682	NaN	5	5	5	19.1	19.1	19.1	13.362	5	0	NMRAL1
FAM21A	WASH complex subunit FAM21A	WASH complex subunit 2A;WASH complex subunit 2A;WASH complex subunit 2A;WASH complex subunit 2A	E7ESD2;Q641Q2;A0A087WYF6;F8W7U3	E7ESD2;Q641Q2;A0A087WYF6;F8W7U3	140.17	22.6805	15.3079	26	26	7	37.5	37.5	12	182.82	30	0	FAM21A
F3	Tissue factor	Tissue factor	P13726	P13726	33.067	22.6762	17.9781	3	3	3	13.9	13.9	13.9	10.008	5	1	F3
CSRP2	Cysteine and glycine-rich protein 2	Cysteine and glycine-rich protein 2;Cysteine and glycine-rich protein 2;Cysteine and glycine-rich protein 2	F8VQR7;F8VW96;Q16527	F8VQR7;F8VW96;Q16527	20.677	22.6739	NaN	6	6	6	42.8	42.8	42.8	15.639	7	0	CSRP2
ENOSF1	Mitochondrial enolase superfamily member 1	Mitochondrial enolase superfamily member 1;Mitochondrial enolase superfamily member 1	Q7L5Y1;J3QL81	Q7L5Y1;J3QL81	49.786	22.6734	15.5483	10	10	10	28.9	28.9	28.9	29.234	8	0	ENOSF1
RTCA	RNA 3-terminal phosphate cyclase	RNA 3-terminal phosphate cyclase	O00442;A6NIC1	O00442	39.336	22.6693	15.3605	11	11	11	37.4	37.4	37.4	49.748	5	0	RTCA
HARS	Histidine--tRNA ligase, cytoplasmic	Histidine--tRNA ligase, cytoplasmic;Histidine--tRNA ligase, cytoplasmic;Histidine--tRNA ligase, cytoplasmic;Histidine--tRNA ligase, cytoplasmic;Histidine--tRNA ligase, cytoplasmic (Fragment)	P12081;B4DDD8;B3KWE1;B4E1C5;E7ETE2;D6RF05;A0A2R8YCI2;A0A2R8YFR1;A0A2R8Y6I1;A0A2R8Y3N3;A0A2R8Y5P7;P49590;A0A2R8Y4X6;A0A2R8Y5E8;D6RJE6;B4DQ67;D6RB22	P12081;B4DDD8;B3KWE1;B4E1C5;E7ETE2	57.41	22.6684	NaN	18	18	18	38.9	38.9	38.9	90.909	12	0	HARS
COPS4	COP9 signalosome complex subunit 4	COP9 signalosome complex subunit 4;COP9 signalosome complex subunit 4;COP9 signalosome complex subunit 4 (Fragment);COP9 constitutive photomorphogenic-like protein subunit 4 isoform 2	Q9BT78;D6RFN0;D6RD63;D6RAX7	Q9BT78;D6RFN0;D6RD63;D6RAX7	46.268	22.6639	NaN	17	17	17	54.9	54.9	54.9	51.186	8	0	COPS4
ALPL	Alkaline phosphatase, tissue-nonspecific isozyme	Alkaline phosphatase, tissue-nonspecific isozyme	P05186;B1ANL0;REV__Q86WI3	P05186	57.304	22.6608	19.7901	16	16	16	34	34	34	82.393	7	4	ALPL
UNC119B	Protein unc-119 homolog B	Protein unc-119 homolog B	A6NIH7;K7EJU3;K7EN86	A6NIH7	28.136	22.6437	NaN	6	6	5	47.8	47.8	44.2	21.385	11	0	UNC119B
INADL	InaD-like protein	InaD-like protein;InaD-like protein;InaD-like protein;InaD-like protein	A0A2R8Y549;Q8NI35;A0A0X1KG69;A0A087WUZ6;A0A0U1RR46;A0A0U1RQT2;A0A2R8Y5I3;B4DE90;A0A0U1RRD7;A0A0U1RQR3;A0A0U1RQW4	A0A2R8Y549;Q8NI35;A0A0X1KG69;A0A087WUZ6	204.7	22.6381	14.2513	31	31	30	25.5	25.5	25	157.83	34	1	INADL
NTPCR	Cancer-related nucleoside-triphosphatase	Cancer-related nucleoside-triphosphatase;Cancer-related nucleoside-triphosphatase	Q9BSD7;Q5TDF0	Q9BSD7;Q5TDF0	20.713	22.6343	NaN	7	7	7	60	60	60	21.913	6	0	NTPCR
MYH14	Myosin-14	Myosin-14	Q7Z406;A1L2Z2;A0A0C4DFM8;M0QY43;A0A2R8Y4C3;A0A2R8Y454	Q7Z406	227.87	22.6302	15.2368	71	58	58	42.3	37.5	37.5	265.59	46	0	MYH14
ILK	Integrin-linked protein kinase	Integrin-linked protein kinase;Integrin-linked protein kinase	A0A0A0MTH3;Q13418;A0A087WWY6;E9PQ52;A0A087WW45	A0A0A0MTH3;Q13418	54.611	22.6238	14.3479	14	14	14	38.3	38.3	38.3	47.325	11	0	ILK
SLC26A2	Sulfate transporter	Sulfate transporter	P50443;C9JAN6	P50443	81.661	22.6103	18.3276	3	3	3	7	7	7	23.101	5	0	SLC26A2
CPPED1	Serine/threonine-protein phosphatase CPPED1	Serine/threonine-protein phosphatase CPPED1	Q9BRF8	Q9BRF8	35.548	22.593	NaN	9	9	9	47.1	47.1	47.1	52.859	5	0	CPPED1
ANKFY1	Rabankyrin-5	Rabankyrin-5	Q9P2R3;K7EPT2;I3L3P8	Q9P2R3	128.4	22.5853	15.9884	15	15	15	18.9	18.9	18.9	106.96	11	1	ANKFY1
RELA	Transcription factor p65	RELA protein;Transcription factor p65 (Fragment);Transcription factor p65;Transcription factor p65;Transcription factor p65 (Fragment);Transcription factor p65 (Fragment);Transcription factor p65;Transcription factor p65	Q2TAM5;E9PKH5;A0A087X0W8;Q04206;E9PI38;E9PQS6;E9PKV4;A0A087WVP0;E9PMD5;E9PM47;E9PNK5;E9PJR1;E9PRX2;E9PN69;E9PNV4	Q2TAM5;E9PKH5;A0A087X0W8;Q04206;E9PI38;E9PQS6;E9PKV4;A0A087WVP0	42.868	22.5745	NaN	7	7	7	21.2	21.2	21.2	19.701	7	0	RELA
ROCK1	Rho-associated protein kinase 1	Rho-associated protein kinase 1;Rho-associated protein kinase 1	Q13464;A0A0U1RQV4;C9JFJ0;J3KRH6	Q13464;A0A0U1RQV4	158.17	22.5743	NaN	33	33	28	29.2	29.2	26.2	172.65	30	0	ROCK1
UMPS	Uridine 5-monophosphate synthase;Orotate phosphoribosyltransferase;Orotidine 5-phosphate decarboxylase	Uridine 5-monophosphate synthase	P11172;E9PFD2;F2Z3P2;F2Z303;F8WDG4	P11172	52.221	22.5685	NaN	12	12	12	32.7	32.7	32.7	45.639	11	0	UMPS
HIST2H3A	Histone H3.2	Histone H3.2	Q71DI3	Q71DI3	15.388	22.565	24.3323	16	16	3	71.3	71.3	28.7	79.016	0	8	HIST2H3A
HMGCS1	Hydroxymethylglutaryl-CoA synthase, cytoplasmic	Hydroxymethylglutaryl-CoA synthase, cytoplasmic	Q01581;D6RIW1	Q01581	57.293	22.5628	NaN	10	10	10	31	31	31	49.385	4	0	HMGCS1
ATG16L1	Autophagy-related protein 16-1	Autophagy-related protein 16-1;Autophagy-related protein 16-1	E7EVC7;Q676U5;C9J1B2;C9J8C6;C9JAY7;C9JK97	E7EVC7;Q676U5	70.01	22.5519	NaN	14	14	14	34.3	34.3	34.3	68.143	13	0	ATG16L1
ACOT1	Acyl-coenzyme A thioesterase 1;Acyl-coenzyme A thioesterase 2, mitochondrial	Acyl-coenzyme A thioesterase 1;Acyl-coenzyme A thioesterase 1;Acyl-coenzyme A thioesterase 2, mitochondrial;Acyl-coenzyme A thioesterase 2, mitochondrial;Acyl-coenzyme A thioesterase 2, mitochondrial	G3V4F2;Q86TX2;A0A087X0W7;A0A087WT95;P49753;A0A2R8Y7H3	G3V4F2;Q86TX2;A0A087X0W7;A0A087WT95;P49753	43.733	22.5489	NaN	11	11	11	46.3	46.3	46.3	40.848	9	0	ACOT1
COPS3	COP9 signalosome complex subunit 3	COP9 signalosome complex subunit 3;COP9 signalosome complex subunit 3	Q9UNS2;H7C3P9;J3QL22;J3QS85;J3KTQ1;J3QKR0;C9JLV5	Q9UNS2;H7C3P9	47.873	22.5453	NaN	7	7	7	23.2	23.2	23.2	101.36	8	0	COPS3
AP1B1	AP-1 complex subunit beta-1	AP-1 complex subunit beta-1;AP-1 complex subunit beta-1 (Fragment)	Q10567;C9J1E7;H7C034	Q10567;C9J1E7	104.64	22.5436	NaN	22	22	11	23.2	23.2	13.3	86.537	13	0	AP1B1
EXOC1	Exocyst complex component 1	Exocyst complex component 1	Q9NV70	Q9NV70	101.98	22.5257	NaN	23	23	23	35.9	35.9	35.9	68.126	21	0	EXOC1
GSTM1	Glutathione S-transferase Mu 1;Glutathione S-transferase Mu 4	Glutathione S-transferase Mu 1;Glutathione S-transferase Mu 1;Glutathione S-transferase Mu 1;Glutathione S-transferase Mu 4;Glutathione S-transferase Mu 4	P09488;B9ZVX7;E7EWW9;A0A0A0MR85;Q03013;H3BQT3;H3BRM6;A6NNT0	P09488;B9ZVX7;E7EWW9;A0A0A0MR85;Q03013	25.712	22.5139	18.2226	18	12	7	67.4	49.5	35.8	44.029	4	1	GSTM1
VPS37A	Vacuolar protein sorting-associated protein 37A	Vacuolar protein sorting-associated protein 37A;Vacuolar protein sorting-associated protein 37A (Fragment)	Q8NEZ2;H0YBN0;E5RJ10;E5RHB8;E5RJX6;E5RG91	Q8NEZ2;H0YBN0	44.314	22.5122	NaN	7	7	7	21.9	21.9	21.9	18.735	6	0	VPS37A
GYG1	Glycogenin-1	Glycogenin-1;Glycogenin 1, isoform CRA_e;Glycogenin-1 (Fragment)	P46976;G5E9W8;C9JQ42;C9J8R8;C9J7C7	P46976;G5E9W8;C9JQ42	39.383	22.5118	NaN	10	10	10	24.9	24.9	24.9	47.399	3	0	GYG1
BSPRY	B box and SPRY domain-containing protein	B box and SPRY domain-containing protein	Q5W0U4	Q5W0U4	44.381	22.5089	NaN	8	8	8	19.2	19.2	19.2	13.838	7	0	BSPRY
RPL35A	60S ribosomal protein L35a	60S ribosomal protein L35a (Fragment);60S ribosomal protein L35a;60S ribosomal protein L35a;60S ribosomal protein L35a	C9K025;P18077;F8WBS5;F8WB72	C9K025;P18077;F8WBS5;F8WB72	10.645	22.5021	16.7787	5	5	5	52.1	52.1	52.1	8.9816	5	0	RPL35A
AHSA1	Activator of 90 kDa heat shock protein ATPase homolog 1	Activator of 90 kDa heat shock protein ATPase homolog 1;Activator of 90 kDa heat shock protein ATPase homolog 1 (Fragment);Activator of 90 kDa heat shock protein ATPase homolog 1 (Fragment)	O95433;G3V438;H0YJG7;H0YJ63;H0YJU2;G3V3W9	O95433;G3V438;H0YJG7	38.274	22.498	NaN	8	8	8	29.6	29.6	29.6	20.634	8	0	AHSA1
SYNCRIP	Heterogeneous nuclear ribonucleoprotein Q	Synaptotagmin binding, cytoplasmic RNA interacting protein, isoform CRA_b;Heterogeneous nuclear ribonucleoprotein Q	B7Z645;O60506;F6UXX1;O43390;B4DT28	B7Z645;O60506	52.046	22.4978	NaN	12	12	12	33.6	33.6	33.6	70.489	7	0	SYNCRIP
PSMD12	26S proteasome non-ATPase regulatory subunit 12	26S proteasome non-ATPase regulatory subunit 12	O00232;J3KTJ5;J3KSK1	O00232	52.904	22.4976	17.7828	12	12	12	25.9	25.9	25.9	44.604	8	0	PSMD12
PSMD5	26S proteasome non-ATPase regulatory subunit 5	26S proteasome non-ATPase regulatory subunit 5	Q16401;F2Z3J2;Q4VXH0	Q16401	56.195	22.4921	NaN	13	13	13	33.1	33.1	33.1	53.151	8	0	PSMD5
IRF6	Interferon regulatory factor 6	Interferon regulatory factor 6;Interferon regulatory factor 6 (Fragment)	O14896;B1AJU4;A0A2R8YHF3	O14896;B1AJU4	53.129	22.4848	NaN	10	10	10	34	34	34	94.458	7	0	IRF6
PXN	Paxillin	Paxillin;Paxillin;Paxillin	F5GZ78;A0A1B0GTU4;P49023;A0A1B0GU60;F5H836;A0A1B0GV30	F5GZ78;A0A1B0GTU4;P49023	64.232	22.4814	NaN	11	11	11	35.5	35.5	35.5	69.285	19	0	PXN
CTH	Cystathionine gamma-lyase	Cystathionine gamma-lyase	P32929	P32929	44.508	22.4759	NaN	10	10	10	30.9	30.9	30.9	25.774	6	0	CTH
WDR7	WD repeat-containing protein 7	WD repeat-containing protein 7;WD repeat-containing protein 7	Q9Y4E6;A2RRE0;K7EMB8;K7EMF3;K7EPQ4	Q9Y4E6;A2RRE0	163.81	22.4668	NaN	31	31	31	33.9	33.9	33.9	108.94	21	0	WDR7
ATG5	Autophagy protein 5	Autophagy protein 5;Autophagy protein 5;Autophagy protein 5;Autophagy protein 5;Autophagy protein 5	Q9H1Y0;A0A1B0GV54;A0A1B0GUS1;L7UQJ2;A0A2R8Y718;L7UMD8;Q7Z3H3	Q9H1Y0;A0A1B0GV54;A0A1B0GUS1;L7UQJ2;A0A2R8Y718	32.447	22.4633	NaN	5	5	5	24.4	24.4	24.4	16.568	3	0	ATG5
GNPDA1	Glucosamine-6-phosphate isomerase;Glucosamine-6-phosphate isomerase 1	Glucosamine-6-phosphate isomerase (Fragment);Glucosamine-6-phosphate isomerase;Glucosamine-6-phosphate isomerase 1;Glucosamine-6-phosphate isomerase (Fragment);Glucosamine-6-phosphate isomerase (Fragment);Glucosamine-6-phosphate isomerase 1 (Fragment)	D6RAY7;D6R9P4;P46926;D6RB13;D6RFF8;D6R917;Q8TDQ7;D6RFK5	D6RAY7;D6R9P4;P46926;D6RB13;D6RFF8;D6R917	26.987	22.4616	NaN	7	7	7	43	43	43	20.495	4	0	GNPDA1
RUVBL1	RuvB-like 1	RuvB-like 1;RuvB-like helicase (Fragment)	Q9Y265;H7C4G5;J3QLR1;E7ETR0;H7C4I3	Q9Y265;H7C4G5	50.227	22.4556	NaN	10	10	10	28.3	28.3	28.3	39.68	11	0	RUVBL1
VPS35	Vacuolar protein sorting-associated protein 35	Vacuolar protein sorting-associated protein 35	Q96QK1;I3L4S0;A0A1W2PP10;A0A3B3ITD4	Q96QK1	91.706	22.4548	15.4957	18	18	18	27	27	27	139.79	5	1	VPS35
EIF4B	Eukaryotic translation initiation factor 4B	Eukaryotic translation initiation factor 4B;Eukaryotic translation initiation factor 4B	E7EX17;P23588;F8VX11;F8W0K0;F8VSC7;F8VP89;F8VRU1;F8VYE9	E7EX17;P23588	69.697	22.454	NaN	14	14	14	29.7	29.7	29.7	54.114	16	0	EIF4B
YAP1	Transcriptional coactivator YAP1	Transcriptional coactivator YAP1	P46937;H0YCI3	P46937	54.461	22.4537	NaN	6	6	6	24.2	24.2	24.2	27.342	8	0	YAP1
THOP1	Thimet oligopeptidase	Thimet oligopeptidase;Thimet oligopeptidase	P52888;K7EP46;K7EKB6;K7EL02;K7EIK4;K7EL32	P52888;K7EP46	78.839	22.4534	NaN	14	14	14	27.3	27.3	27.3	33.074	11	0	THOP1
ASNA1	ATPase ASNA1	ATPase ASNA1;ATPase ASNA1	A0A087WXS7;O43681;K7ERW9	A0A087WXS7;O43681	37.119	22.4433	NaN	7	7	7	29	29	29	33.363	6	0	ASNA1
STAM	Signal transducing adapter molecule 1	Signal transducing adapter molecule 1	Q92783;C9J1E5;A6NMU3	Q92783	59.179	22.441	NaN	9	7	7	22.6	19.1	19.1	20.356	4	0	STAM
PTPRS	Receptor-type tyrosine-protein phosphatase S	Receptor-type tyrosine-protein phosphatase S	Q13332	Q13332	217.04	22.4354	16.8999	30	30	2	23.3	23.3	2.2	93.109	23	1	PTPRS
BAG5	BAG family molecular chaperone regulator 5	BAG family molecular chaperone regulator 5;BAG family molecular chaperone regulator 5 (Fragment)	Q9UL15;G3V274	Q9UL15;G3V274	51.199	22.4311	NaN	13	13	13	38.5	38.5	38.5	59.088	10	0	BAG5
SGSM3	Small G protein signaling modulator 3	Small G protein signaling modulator 3	Q96HU1;B0QY80;H0Y7V2	Q96HU1	85.353	22.4206	NaN	15	15	15	30.2	30.2	30.2	69.838	10	0	SGSM3
AKT1	RAC-alpha serine/threonine-protein kinase	RAC-alpha serine/threonine-protein kinase;RAC-alpha serine/threonine-protein kinase (Fragment);RAC-alpha serine/threonine-protein kinase (Fragment);RAC-alpha serine/threonine-protein kinase (Fragment)	P31749;A0A087WY56;G3V3X1;G3V2I6;G3V4I6;Q9Y243	P31749;A0A087WY56;G3V3X1;G3V2I6	55.686	22.4029	NaN	10	10	9	25.8	25.8	21.5	23.659	6	0	AKT1
PTGES3L-AARSD1	Alanyl-tRNA editing protein Aarsd1	PTGES3L-AARSD1 readthrough;Alanyl-tRNA editing protein Aarsd1;Alanyl-tRNA-editing protein Aarsd1 (Fragment)	C9J5N1;Q9BTE6;L7N2F4;K7EQ85;K7N799	C9J5N1;Q9BTE6;L7N2F4	55.065	22.3998	NaN	9	9	9	31.3	31.3	31.3	29.703	5	0	PTGES3L-AARSD1
AP1M2	AP-1 complex subunit mu-2	AP-1 complex subunit mu-2	Q9Y6Q5;K7ERH5;K7EL08;K7EJJ1;K7EK69;K7EPR4;K7EQX3;K7EMG5	Q9Y6Q5	48.108	22.3993	NaN	12	12	9	29.1	29.1	20.8	36.991	8	0	AP1M2
VPS36	Vacuolar protein-sorting-associated protein 36	Vacuolar protein-sorting-associated protein 36;Vacuolar protein-sorting-associated protein 36	Q86VN1;A0A3B3ISW7	Q86VN1;A0A3B3ISW7	43.816	22.3965	NaN	11	11	11	30.8	30.8	30.8	23.281	8	0	VPS36
PSMD3	26S proteasome non-ATPase regulatory subunit 3	26S proteasome non-ATPase regulatory subunit 3	O43242;H0YGV8	O43242	60.977	22.3964	NaN	19	19	19	43.8	43.8	43.8	59.777	11	0	PSMD3
DDX3X	ATP-dependent RNA helicase DDX3X	ATP-dependent RNA helicase DDX3X;ATP-dependent RNA helicase DDX3X;ATP-dependent RNA helicase DDX3X;ATP-dependent RNA helicase DDX3X;ATP-dependent RNA helicase DDX3X;ATP-dependent RNA helicase DDX3X;ATP-dependent RNA helicase DDX3X;ATP-dependent RNA helicas	A0A2R8Y5G6;A0A0D9SFB3;A0A2R8YF78;A0A2R8YCW1;A0A0D9SG12;A0A2R8YFR4;A0A2U3TZJ9;A0A2R8YFS5;A0A2R8Y4A4;A0A2R8Y645;A0A0D9SF53;O00571;A0A2R8YDT5;A0A2R8Y7T2;F6S8Q4;A0A2R8YDH3;A0A0J9YVQ7;A0A087WVZ1;D6RCM4;Q9NQI0;A0A2R8Y4D2;A0A2R8YCU0;A0A2R8Y650;H0Y960	A0A2R8Y5G6;A0A0D9SFB3;A0A2R8YF78;A0A2R8YCW1;A0A0D9SG12;A0A2R8YFR4;A0A2U3TZJ9;A0A2R8YFS5;A0A2R8Y4A4;A0A2R8Y645;A0A0D9SF53;O00571;A0A2R8YDT5;A0A2R8Y7T2;F6S8Q4;A0A2R8YDH3	69.047	22.3875	NaN	21	21	9	38.4	38.4	18.2	56.933	16	0	DDX3X
ATP6V1C1	V-type proton ATPase subunit C 1	V-type proton ATPase subunit C 1;V-type proton ATPase subunit C	P21283;E7EV59	P21283;E7EV59	43.941	22.3822	NaN	8	8	8	27.5	27.5	27.5	114.86	4	0	ATP6V1C1
TMED10	Transmembrane emp24 domain-containing protein 10	Transmembrane emp24 domain-containing protein 10;Transmembrane emp24 domain-containing protein 10	P49755;G3V2K7	P49755;G3V2K7	24.976	22.3816	NaN	5	5	5	21.9	21.9	21.9	71.883	5	0	TMED10
S100A9	Protein S100-A9	Protein S100-A9	P06702	P06702	13.242	22.38	17.8452	8	8	8	65.8	65.8	65.8	39.956	1	1	S100A9
YBX1	Nuclease-sensitive element-binding protein 1	Nuclease-sensitive element-binding protein 1;Nuclease-sensitive element-binding protein 1 (Fragment)	P67809;H0Y449;P16989;C9J5V9;Q9Y2T7	P67809;H0Y449	35.924	22.3788	NaN	8	8	8	42	42	42	80.086	8	0	YBX1
ZFAND2B	AN1-type zinc finger protein 2B	AN1-type zinc finger protein 2B;AN1-type zinc finger protein 2B (Fragment);AN1-type zinc finger protein 2B;cDNA FLJ60439, highly similar to AN1-type zinc finger protein 2B;AN1-type zinc finger protein 2B;AN1-type zinc finger protein 2B	Q8WV99;E7EV05;E9PFU9;B4DEN4;B8ZZ56;A0A087X0D9;F8WEE4;C9J1R6	Q8WV99;E7EV05;E9PFU9;B4DEN4;B8ZZ56;A0A087X0D9	28.022	22.3764	NaN	9	9	9	57.2	57.2	57.2	29.143	7	0	ZFAND2B
PSMB10	Proteasome subunit beta type-10	Proteasome subunit beta type-10	P40306;J3QQN1	P40306	28.936	22.3727	NaN	5	5	5	40.3	40.3	40.3	31.235	5	0	PSMB10
SCFD1	Sec1 family domain-containing protein 1	Sec1 family domain-containing protein 1	Q8WVM8;G3V3K9;G3V4I1;G3V5F3;J3KNG4;G3V363;H0YJS6;H0YJY1;G3V2M8	Q8WVM8	72.379	22.3712	15.9205	16	16	16	42.4	42.4	42.4	79.059	12	0	SCFD1
GPC1	Glypican-1;Secreted glypican-1	Glypican-1;Glypican-1;Glypican-1 (Fragment)	P35052;H7C410;H7C024;H7BZE9;C9J4Y6;H7BZL4	P35052;H7C410;H7C024	61.68	22.3498	21.0274	9	9	9	24.9	24.9	24.9	30.035	9	5	GPC1
EIF4G1	Eukaryotic translation initiation factor 4 gamma 1	Eukaryotic translation initiation factor 4 gamma 1;Eukaryotic translation initiation factor 4 gamma 1;Eukaryotic translation initiation factor 4 gamma 1;Eukaryotic translation initiation factor 4 gamma 1;Eukaryotic translation initiation factor 4 gamma 1 (	E7EX73;E9PGM1;E7EUU4;Q04637;C9JF13;C9J6B6;A0A0A0MSA7;A0A0U1RQK7;O43432;C9J2Z7;C9K073;H7C044;H7C0V6;F8WCF2;C9JHW9	E7EX73;E9PGM1;E7EUU4;Q04637;C9JF13	158.64	22.347	14.2564	21	21	21	18.2	18.2	18.2	55.936	18	1	EIF4G1
CCDC50	Coiled-coil domain-containing protein 50	Coiled-coil domain-containing protein 50	Q8IVM0	Q8IVM0	35.822	22.3441	NaN	7	7	7	28.8	28.8	28.8	11.769	5	0	CCDC50
GOLPH3	Golgi phosphoprotein 3	Golgi phosphoprotein 3	Q9H4A6;D6REM1;Q9H4A5;Q5T5I6	Q9H4A6	33.81	22.3421	NaN	10	10	10	35.9	35.9	35.9	25.858	10	0	GOLPH3
PTPN6	Tyrosine-protein phosphatase non-receptor type 6	Tyrosine-protein phosphatase non-receptor type 6	P29350;F5H5H9;F5H1Z8;F5H0N8;F5H1V7;F5GXD4;U3KQS1;F5GY79	P29350	67.56	22.3407	NaN	16	16	13	35.3	35.3	31.3	45.624	12	0	PTPN6
TROVE2	60 kDa SS-A/Ro ribonucleoprotein	60 kDa SS-A/Ro ribonucleoprotein	P10155;H0Y9N5;D6RDN1;D6RE09	P10155	60.67	22.3246	NaN	9	9	9	27.5	27.5	27.5	23.044	4	0	TROVE2
GNA11	Guanine nucleotide-binding protein subunit alpha-11	Guanine nucleotide-binding protein subunit alpha-11	P29992;K7EL62;A0A087WVZ3	P29992	42.123	22.3181	NaN	15	10	8	45.4	33.7	25.3	28.061	7	0	GNA11
EXOC6	Exocyst complex component 6	Exocyst complex component;Exocyst complex component 6;Exocyst complex component 6	E7EW84;Q8TAG9;B1AP46	E7EW84;Q8TAG9;B1AP46	81.851	22.3103	14.7733	12	12	11	19.5	19.5	19.5	65.019	10	0	EXOC6
PPP1R12A	Protein phosphatase 1 regulatory subunit 12A	Protein phosphatase 1 regulatory subunit 12A;Protein phosphatase 1 regulatory subunit 12A (Fragment)	O14974;F8VZN8;H0YHI8;A0A3B3ISH4;H0YIS4;H0YIS3;A0A0U1RQZ1;H0YIM2;H0YHL8;F8VW28;H0YIL7	O14974;F8VZN8	115.28	22.3055	NaN	24	24	24	31.7	31.7	31.7	70.148	18	0	PPP1R12A
CA4	Carbonic anhydrase 4	Carbonic anhydrase 4;Carbonic anhydrase 4 (Fragment)	P22748;K7EKY5;K7EIH9;K7ENI8	P22748;K7EKY5	35.032	22.3037	19.4182	10	10	10	26.9	26.9	26.9	16.396	3	0	CA4
RAP2B	Ras-related protein Rap-2b	Ras-related protein Rap-2b	P61225	P61225	20.504	22.2983	NaN	4	4	2	25.1	25.1	16.4	10.051	3	0	RAP2B
PPP6C	Serine/threonine-protein phosphatase 6 catalytic subunit;Serine/threonine-protein phosphatase 6 catalytic subunit, N-terminally processed	Serine/threonine-protein phosphatase 6 catalytic subunit	O00743	O00743	35.144	22.2945	NaN	6	6	6	28.5	28.5	28.5	27.565	4	0	PPP6C
ATXN3	Ataxin-3	Ataxin-3 (Fragment);Ataxin 3 variant m;Ataxin-3;Ataxin-3;Ataxin-3 (Fragment);Ataxin-3;Ataxin-3;Ataxin-3;Ataxin-3 (Fragment);Ataxin-3 (Fragment);Ataxin-3 (Fragment);Ataxin-3 (Fragment);Ataxin-3;Ataxin-3;Ataxin-3 (Fragment);Ataxin-3 (Fragment);Ataxin-3	G3V4U9;D3VVH9;A0A0A0MS38;A0A087X1A8;G3V3R7;A0A2R8Y3X7;F5H211;P54252;G3V3T6;G3V2G2;G3V2G1;G3V328;C9JQV6;G3V526;S4R399;E9PJN5;A0A087WXY4;A0A2R8Y888;G3V3A6;D3VVP3;D6R9I5;G3V4B1;G3V390;G3V3S5;G3V4F5;G3V4F4;G3V5H3	G3V4U9;D3VVH9;A0A0A0MS38;A0A087X1A8;G3V3R7;A0A2R8Y3X7;F5H211;P54252;G3V3T6;G3V2G2;G3V2G1;G3V328;C9JQV6;G3V526;S4R399;E9PJN5;A0A087WXY4	31.61	22.2868	NaN	5	5	5	19.4	19.4	19.4	55.101	4	0	ATXN3
QARS	Glutamine--tRNA ligase	Glutamine--tRNA ligase;Glutamine--tRNA ligase (Fragment);Glutamine--tRNA ligase	P47897;A0A1B0GVU9;B4DDN1;H7C0R3;A0A0U1RQX5;A0A0U1RQM8;A0A0U1RQT0;A0A0U1RQX9;A0A0U1RRC8;A0A0U1RQU2;A0A0U1RRI9;A0A0U1RQE9;C9J165;A0A0U1RQL2;A0A1B0GTT3;A0A0U1RQQ5;A0A0U1RR79;F2Z2V6;A0A0U1RR66	P47897;A0A1B0GVU9;B4DDN1	87.798	22.2807	16.9015	18	18	18	31.7	31.7	31.7	71.326	11	1	QARS
CCDC22	Coiled-coil domain-containing protein 22	Coiled-coil domain-containing protein 22	O60826	O60826	70.755	22.2723	NaN	14	14	14	33.7	33.7	33.7	48.798	10	0	CCDC22
PDE12	2,5-phosphodiesterase 12	2,5-phosphodiesterase 12;2,5-phosphodiesterase 12	Q6L8Q7;F6T1Q0	Q6L8Q7;F6T1Q0	67.351	22.2692	NaN	11	11	11	23	23	23	42.357	11	0	PDE12
CTSG	Cathepsin G	Cathepsin G	P08311	P08311	28.837	22.2683	19.2283	18	18	18	61.2	61.2	61.2	50.612	0	0	CTSG
CTNNA1	Catenin alpha-1	Catenin alpha-1;Catenin (Cadherin-associated protein), alpha 1, 102kDa, isoform CRA_a	P35221;G3XAM7;E5RJ41;P26232;E5RGY7;E5RIB1;A0A0A0MTJ6;A0A0A0MRI5;E5RJZ2;E5RIT8;E5RFM3;E5RJL0;E5RIE0;E5RHV7;H0YBB8;E5RGY6;E5RG03;Q9UI47	P35221;G3XAM7	100.07	22.2563	NaN	17	17	17	25.7	25.7	25.7	175.18	9	0	CTNNA1
CRISPLD2	Cysteine-rich secretory protein LCCL domain-containing 2	Cysteine-rich secretory protein LCCL domain-containing 2;Cysteine-rich secretory protein LCCL domain-containing 2	H3BTI0;Q9H0B8;H3BSZ9;J3QKP2;H3BTP0	H3BTI0;Q9H0B8	55.79	22.2563	22.8471	15	15	15	50.6	50.6	50.6	85.859	4	15	CRISPLD2
DNAJA4	DnaJ homolog subfamily A member 4	DnaJ homolog subfamily A member 4	Q8WW22;C9JDE6;F5H170	Q8WW22	44.797	22.2541	NaN	8	8	8	29.2	29.2	29.2	33.097	10	0	DNAJA4
NUCB2	Nucleobindin-2;Nesfatin-1	Nucleobindin-2;Nucleobindin 2, isoform CRA_b;Nucleobindin-2;Nucb2 splice variant;Nucleobindin-2 (Fragment);Nucleobindin-2 (Fragment);Nucleobindin-2	P80303;A0A087WSV8;E9PKG6;Q2L696;E9PLR0;E9PLE9;A0A2R8Y6G7;H0YEG8;H0YD18;E9PM22;E9PJP3	P80303;A0A087WSV8;E9PKG6;Q2L696;E9PLR0;E9PLE9;A0A2R8Y6G7	50.222	22.2519	25.0673	35	35	34	71.4	71.4	69.5	234.61	8	43	NUCB2
CCDC125	Coiled-coil domain-containing protein 125	Coiled-coil domain-containing protein 125;Coiled-coil domain-containing protein 125	Q86Z20;F8W912	Q86Z20;F8W912	58.628	22.2513	NaN	15	15	15	36	36	36	84.403	9	0	CCDC125
RPS6KA1	Ribosomal protein S6 kinase;Ribosomal protein S6 kinase alpha-1	Ribosomal protein S6 kinase;Ribosomal protein S6 kinase alpha-1	E9PGT3;Q15418;Q5SVM6;Q5SVM7;E9PAN7;Q9UK32	E9PGT3;Q15418	81.471	22.25	NaN	20	20	18	40.1	40.1	37.4	78.225	20	0	RPS6KA1
LGMN	Legumain	Legumain	Q99538;G3V4P5;G3V3Z4;G3V2T4;G3V4E4	Q99538	49.411	22.2467	22.1582	10	10	10	27.9	27.9	27.9	35.028	4	10	LGMN
HNRNPK	Heterogeneous nuclear ribonucleoprotein K	Heterogeneous nuclear ribonucleoprotein K (Fragment);Heterogeneous nuclear ribonucleoprotein K	Q5T6W2;P61978;S4R457;S4R359	Q5T6W2;P61978	41.807	22.2405	16.7702	12	12	12	38.5	38.5	38.5	38.234	11	0	HNRNPK
INPP4B	Type II inositol 3,4-bisphosphate 4-phosphatase	Type II inositol 3,4-bisphosphate 4-phosphatase;Type II inositol 3,4-bisphosphate 4-phosphatase (Fragment);Type II inositol 3,4-bisphosphate 4-phosphatase;Type II inositol 3,4-bisphosphate 4-phosphatase	O15327;D6RJC3;E7EQN9;E9PG59;E9PHC0;E9PCZ3;D6RE59;H0YA10;D6R9J5;D6RDJ7;Q9BS68	O15327;D6RJC3;E7EQN9;E9PG59	104.74	22.2381	NaN	18	18	18	31.3	31.3	31.3	94.715	16	0	INPP4B
MYH10	Myosin-10	Myosin-10	P35580;E7ERA5	P35580	229	22.2372	14.4648	67	47	46	35.3	28.7	28.2	234.77	31	0	MYH10
REPS2	RalBP1-associated Eps domain-containing protein 2	RalBP1-associated Eps domain-containing protein 2	Q8NFH8	Q8NFH8	71.533	22.2303	NaN	12	12	11	30.3	30.3	28.8	39.498	13	0	REPS2
CST4	Cystatin-S;Cystatin-SA;Cystatin-SN	Cystatin-S;Cystatin-SA;Cystatin-SN	P01036;P09228;P01037	P01036;P09228;P01037	16.214	22.2298	21.8219	4	4	4	39	39	39	11.112	1	3	CST4
IRGQ	Immunity-related GTPase family Q protein	Immunity-related GTPase family Q protein;Immunity-related GTPase family Q protein (Fragment)	Q8WZA9;M0QZP8	Q8WZA9;M0QZP8	62.717	22.2228	NaN	8	8	8	22.2	22.2	22.2	36.87	6	0	IRGQ
TMEM8A	Transmembrane protein 8A	Post-GPI attachment to proteins factor 6;Post-GPI attachment to proteins factor 6	Q9HCN3;K4DI83;H0Y5B2;H7C1S0	Q9HCN3;K4DI83	84.76	22.219	21.3062	19	19	19	31	31	31	51.029	6	6	TMEM8A
DEFB129	Beta-defensin 129	Beta-defensin 129	Q9H1M3	Q9H1M3	20.298	22.2041	NaN	6	6	6	18	18	18	8.317	3	0	DEFB129
ASPSCR1	Tether containing UBX domain for GLUT4	Tether containing UBX domain for GLUT4;Tether-containing UBX domain for GLUT4 (Fragment);Tether-containing UBX domain for GLUT4	Q9BZE9;J3QL04;J3QR12;J3KRY8;J3KRF7;J3QRW3;J3KRG1;C9JAL9;J3QR50	Q9BZE9;J3QL04;J3QR12	60.182	22.1998	NaN	10	10	10	27.7	27.7	27.7	40.057	11	0	ASPSCR1
EXOC4	Exocyst complex component 4	Exocyst complex component 4	Q96A65	Q96A65	110.5	22.1912	NaN	17	17	17	23.1	23.1	23.1	51.704	12	0	EXOC4
EEA1	Early endosome antigen 1	Early endosome antigen 1	Q15075	Q15075	162.46	22.1862	NaN	40	40	40	34.9	34.9	34.9	113.68	36	0	EEA1
ASL	Argininosuccinate lyase	Argininosuccinate lyase	P04424;F8W943	P04424	51.657	22.1776	NaN	9	9	9	25.6	25.6	25.6	16.473	5	0	ASL
CLINT1	Clathrin interactor 1	Clathrin interactor 1	Q14677	Q14677	68.259	22.1739	17.1285	8	8	8	17.9	17.9	17.9	16.79	9	0	CLINT1
GPR64	G-protein coupled receptor 64	Adhesion G-protein coupled receptor G2	Q8IZP9	Q8IZP9	111.59	22.1613	21.0598	3	3	3	4.7	4.7	4.7	13.726	4	7	GPR64
AGR2	Anterior gradient protein 2 homolog	Anterior gradient protein 2 homolog;Anterior gradient protein 2 homolog;Anterior gradient protein 2 homolog (Fragment);Anterior gradient protein 2 homolog (Fragment)	O95994;B5MC07;H7C3Z9;C9J3E2;H7C040;B5MC62;Q8TD06	O95994;B5MC07;H7C3Z9;C9J3E2	19.979	22.1575	17.6332	5	5	5	48.6	48.6	48.6	37.256	1	1	AGR2
CTSZ	Cathepsin Z	Cathepsin Z	Q9UBR2	Q9UBR2	33.868	22.1487	22.8141	8	8	8	18.2	18.2	18.2	18.354	1	6	CTSZ
UCHL5	Ubiquitin carboxyl-terminal hydrolase;Ubiquitin carboxyl-terminal hydrolase isozyme L5	Ubiquitin carboxyl-terminal hydrolase;Ubiquitin carboxyl-terminal hydrolase (Fragment);Ubiquitin carboxyl-terminal hydrolase isozyme L5;Ubiquitin carboxyl-terminal hydrolase (Fragment);Ubiquitin carboxyl-terminal hydrolase isozyme L5 (Fragment)	Q5LJA5;Q5LJA9;Q9Y5K5;Q5LJB0;H0Y6Y4;H0Y636;H0Y4E0;H0Y4K0	Q5LJA5;Q5LJA9;Q9Y5K5;Q5LJB0;H0Y6Y4	40.423	22.1442	NaN	10	10	10	27.9	27.9	27.9	29.169	5	0	UCHL5
NCKAP1	Nck-associated protein 1	Nck-associated protein 1	Q9Y2A7;F8W050;P55160	Q9Y2A7	128.79	22.1377	15.6639	17	17	17	18.4	18.4	18.4	52.952	14	0	NCKAP1
EXOC3	Exocyst complex component 3	Exocyst complex component 3	O60645	O60645	86.844	22.123	NaN	10	10	2	18.8	18.8	5.8	23.68	9	0	EXOC3
FLII	Protein flightless-1 homolog	Protein flightless-1 homolog	Q13045;J3KS54;J3QQQ2;J3KS39;K7EP37;J3QQU5;K7EP27;J3QLR6;K7EQZ7	Q13045	144.75	22.1195	NaN	25	25	25	28.2	28.2	28.2	71.266	18	0	FLII
KBTBD11	Kelch repeat and BTB domain-containing protein 11	Kelch repeat and BTB domain-containing protein 11	O94819	O94819	65.719	22.1177	NaN	8	8	8	27.1	27.1	27.1	37.234	6	0	KBTBD11
FSTL1	Follistatin-related protein 1	Follistatin-related protein 1	Q12841;C9J5G4;H7C4W4	Q12841	34.985	22.1119	19.2189	8	8	8	26.6	26.6	26.6	75.77	7	3	FSTL1
AP2A2	AP-2 complex subunit alpha-2	AP-2 complex subunit alpha-2;AP-2 complex subunit alpha-2 (Fragment)	O94973;A0A0G2JS82;A0A0G2JQM1;E9PR62;M0R2D9;A0A0G2JRF9;A0A0G2JQA4;E9PPY8;A0A0G2JS17;A0A0G2JQT9;H0YDE9;H0YEG0	O94973;A0A0G2JS82	103.96	22.1014	NaN	18	18	11	23.1	23.1	17.5	78.294	8	0	AP2A2
SMAD4	Mothers against decapentaplegic homolog;Mothers against decapentaplegic homolog 4	Mothers against decapentaplegic homolog;Mothers against decapentaplegic homolog 4;Mothers against decapentaplegic homolog 4 (Fragment);Mothers against decapentaplegic homolog 4 (Fragment);Mothers against decapentaplegic homolog 4	K7EIU8;Q13485;K7EIJ2;K7ENG8;K7ES96;K7EL18;K7ENG1;K7EL15;A0A087WUF3	K7EIU8;Q13485;K7EIJ2;K7ENG8;K7ES96	50.052	22.0926	18.3317	7	7	7	18.6	18.6	18.6	52.797	7	0	SMAD4
TSN	Translin	Translin;Translin	E9PGT1;Q15631;A0A0J9YVW2;H7C1D4	E9PGT1;Q15631	25.572	22.0839	NaN	6	6	6	33.6	33.6	33.6	12.887	3	0	TSN
C14orf166	UPF0568 protein C14orf166	RNA transcription, translation and transport factor protein;RNA transcription, translation and transport factor protein	Q9Y224;G3V4C6;H0YJB9	Q9Y224;G3V4C6	28.068	22.0829	NaN	7	7	7	44.3	44.3	44.3	32.415	4	0	C14orf166
COPB2	Coatomer subunit beta	Coatomer subunit beta	P35606;D6R997;D6RBZ7;D6RCL6;D6RBG7;D6RBT6;H0YAC7;H0Y938	P35606	102.49	22.0818	NaN	18	18	18	31.1	31.1	31.1	62.71	13	0	COPB2
MAGED2	Melanoma-associated antigen D2	Melanoma-associated antigen D2;Melanoma-associated antigen D2;Melanoma antigen family D, 2, isoform CRA_d	Q9UNF1;Q5H909;Q5H907;B1AKE8;A0A087X070;G5E9N2;Q12816	Q9UNF1;Q5H909;Q5H907	64.953	22.0816	NaN	16	16	16	34	34	34	108.04	12	0	MAGED2
PPIB	Peptidyl-prolyl cis-trans isomerase B	Peptidyl-prolyl cis-trans isomerase B	P23284	P23284	23.742	22.0783	22.0558	7	7	7	33.3	33.3	33.3	21.018	0	4	PPIB
SERBP1	Plasminogen activator inhibitor 1 RNA-binding protein	Plasminogen activator inhibitor 1 RNA-binding protein	Q8NC51	Q8NC51	44.965	22.0695	NaN	7	7	7	25.5	25.5	25.5	23.287	6	0	SERBP1
EPS8	Epidermal growth factor receptor kinase substrate 8	Epidermal growth factor receptor kinase substrate 8;Epidermal growth factor receptor kinase substrate 8;Epidermal growth factor receptor kinase substrate 8	A0A2R8YE63;Q12929;A0A2R8Y4W2;F5H0R8;F5H3Q6;F5GYM8;F5H1B5;F5H2B8;H0YFG1	A0A2R8YE63;Q12929;A0A2R8Y4W2	93.776	22.0608	20.4019	29	29	29	52.3	52.3	52.3	136.53	8	6	EPS8
THUMPD3	THUMP domain-containing protein 3	THUMP domain-containing protein 3;THUMP domain-containing protein 3 (Fragment)	Q9BV44;H7C3J3;H7C0R6	Q9BV44;H7C3J3	57.002	22.0594	NaN	8	8	8	24.7	24.7	24.7	27.825	15	0	THUMPD3
LRRFIP2	Leucine-rich repeat flightless-interacting protein 2	Leucine-rich repeat flightless-interacting protein 2	Q9Y608;H7C3N9;C9JSU1	Q9Y608	82.17	22.0522	NaN	12	11	11	18	16.4	16.4	25.498	9	0	LRRFIP2
RAB11FIP1	Rab11 family-interacting protein 1	Rab11 family-interacting protein 1;Rab11 family-interacting protein 1	Q6WKZ4;E7EX40	Q6WKZ4;E7EX40	137.17	22.0512	NaN	16	16	15	17.6	17.6	16.7	52.145	18	0	RAB11FIP1
ANKIB1	Ankyrin repeat and IBR domain-containing protein 1	Ankyrin repeat and IBR domain-containing protein 1	Q9P2G1;H7C2V2;C9JZ63	Q9P2G1	122	22.0497	15.6603	21	21	21	26.9	26.9	26.9	79.71	20	0	ANKIB1
WBP2	WW domain-binding protein 2	cDNA FLJ59459, highly similar to WW domain-binding protein 2;WW domain-binding protein 2;WW domain-binding protein 2;WW domain-binding protein 2 (Fragment)	A6NG10;K7EMC9;Q969T9;K7EIK1;K7EIN1;K7ESN4;K7EIJ0;K7ENL2	A6NG10;K7EMC9;Q969T9;K7EIK1	25.807	22.0354	20.0156	3	3	3	20.5	20.5	20.5	12.359	7	2	WBP2
KIF21A	Kinesin-like protein KIF21A	Kinesin-like protein KIF21A;Kinesin-like protein KIF21A (Fragment)	Q7Z4S6;A0A1B0GV47;H0YHT2;H0YIM7;H0YIM6;H0YI78;H0YHG9;Q2M1P5	Q7Z4S6;A0A1B0GV47	187.18	22.0309	16.3514	28	28	25	22.8	22.8	20.8	179.69	22	0	KIF21A
SLC15A2	Solute carrier family 15 member 2	Solute carrier family 15 member 2	Q16348	Q16348	81.783	21.9809	19.5521	10	10	10	10	10	10	15.915	4	3	SLC15A2
HOOK2	Protein Hook homolog 2	Protein Hook homolog 2	Q96ED9;K7ENU5;K7EJ48;K7EMR5;K7EMG7;K7EK29;K7EJ65	Q96ED9	83.206	21.9619	NaN	16	16	16	33.8	33.8	33.8	56.079	8	0	HOOK2
EXOC5	Exocyst complex component 5	Exocyst complex component 5;Exocyst complex component 5;Exocyst complex component 5	O00471;A0A0A0MSI8;F8W9B8;G3V4Z7;G3V377	O00471;A0A0A0MSI8;F8W9B8	81.852	21.9618	14.4263	13	13	13	26.7	26.7	26.7	59.718	10	0	EXOC5
CPZ	Carboxypeptidase Z	Carboxypeptidase Z	Q66K79	Q66K79	73.655	21.9597	21.2765	24	24	24	44.3	44.3	44.3	101.82	8	8	CPZ
CAB39	Calcium-binding protein 39	Calcium-binding protein 39;Calcium-binding protein 39	A0A087X0K1;Q9Y376	A0A087X0K1;Q9Y376	39.452	21.9474	NaN	7	7	6	26	26	23	22.922	6	0	CAB39
CSK	Tyrosine-protein kinase CSK	Tyrosine-protein kinase CSK	P41240;H3BUM9;H3BU69;K7ENL8;K7ES68;K7EQY5;P42679	P41240	50.704	21.9469	NaN	10	10	10	30.9	30.9	30.9	35.041	5	0	CSK
RABGEF1	Rab5 GDP/GTP exchange factor	Rab5 GDP/GTP exchange factor;Rab5 GDP/GTP exchange factor;RAP1 short isoform;RAB guanine nucleotide exchange factor (GEF) 1, isoform CRA_c	E9PFK9;Q9UJ41;Q3HKR1;A0A0A0MSJ3;C9JDA2;A0A1W2PPY0;V9GYI8;E9PHB8	E9PFK9;Q9UJ41;Q3HKR1;A0A0A0MSJ3	58.394	21.9465	NaN	8	8	8	21.8	21.8	21.8	19.693	11	0	RABGEF1
WDR77	Methylosome protein 50	Methylosome protein 50	Q9BQA1;H0Y711	Q9BQA1	36.724	21.9423	NaN	5	5	5	22.2	22.2	22.2	21.465	6	0	WDR77
COL4A3BP	Collagen type IV alpha-3-binding protein	Collagen type IV alpha-3-binding protein (Fragment);Collagen type IV alpha-3-binding protein;Collagen type IV alpha-3-binding protein;Collagen type IV alpha-3-binding protein;Collagen type IV alpha-3-binding protein;Collagen type IV alpha-3-binding protein	A0A2R8Y5H3;A0A2R8Y7Q9;A0A2R8YEK8;A0A2R8Y5S9;Q9Y5P4;A0A2U3TZL3;A0A2R8YE18;A0A2R8Y7C5;A0A2R8YFI2;A0A2R8YEA4;A0A2R8YE59;A0A2R8YCI0;A0A2R8YFA1;A0A2R8YDX6;H0Y9J1	A0A2R8Y5H3;A0A2R8Y7Q9;A0A2R8YEK8;A0A2R8Y5S9;Q9Y5P4;A0A2U3TZL3;A0A2R8YE18;A0A2R8Y7C5;A0A2R8YFI2;A0A2R8YEA4;A0A2R8YE59	59.269	21.9408	NaN	9	9	9	31.5	31.5	31.5	35.862	6	0	COL4A3BP
SCPEP1	Retinoid-inducible serine carboxypeptidase	Retinoid-inducible serine carboxypeptidase	Q9HB40;I3L4Z9;I3L4Z3	Q9HB40	50.83	21.9407	22.812	8	8	6	24.3	24.3	19	28.014	5	6	SCPEP1
RAB3IP	Rab-3A-interacting protein	Rab-3A-interacting protein;Rab-3A-interacting protein (Fragment);Rab-3A-interacting protein	Q96QF0;H0YI02;J3KPG1;F8VTR6;H0YD03;H3BNG1	Q96QF0;H0YI02;J3KPG1	53.021	21.9315	NaN	8	8	8	23.1	23.1	23.1	34.578	7	0	RAB3IP
EIF4A2	Eukaryotic initiation factor 4A-II;Eukaryotic initiation factor 4A-II, N-terminally processed	Eukaryotic initiation factor 4A-II;Eukaryotic initiation factor 4A-II	Q14240;E7EQG2	Q14240;E7EQG2	46.402	21.9137	16.1091	12	5	5	33.7	12.3	12.3	36.82	5	0	EIF4A2
RABL6	Rab-like protein 6	Chromosome 9 open reading frame 86, isoform CRA_b;Rab-like protein 6;Rab-like protein 6;Chromosome 9 open reading frame 86, isoform CRA_d	H0Y4Z8;Q3YEC7;F2Z2T0;G3V154;H0Y7H6	H0Y4Z8;Q3YEC7;F2Z2T0;G3V154	79.635	21.8933	NaN	11	11	11	22.3	22.3	22.3	21.236	11	0	RABL6
OCRL	Inositol polyphosphate 5-phosphatase OCRL-1	Inositol polyphosphate 5-phosphatase OCRL-1	Q01968;A0A2R8YG38;A0A2R8YCN4;A0A2R8YF88	Q01968	104.2	21.8905	NaN	14	14	14	26.5	26.5	26.5	31.862	11	0	OCRL
RARS	Arginine--tRNA ligase, cytoplasmic	Arginine--tRNA ligase, cytoplasmic	P54136;E5RJM9;E5RH09;E5RI24	P54136	75.378	21.885	17.1037	19	19	19	35.9	35.9	35.9	42.954	5	0	RARS
TTYH3	Protein tweety homolog 3	Protein tweety homolog 3	Q9C0H2	Q9C0H2	57.544	21.8824	18.0674	4	4	4	8.8	8.8	8.8	10.454	5	0	TTYH3
ARHGEF7	Rho guanine nucleotide exchange factor 7	Rho guanine nucleotide exchange factor 7;Rho guanine nucleotide exchange factor 7;Rho guanine nucleotide exchange factor 7;Rho guanine nucleotide exchange factor 7 (Fragment);Rho guanine nucleotide exchange factor 7	B1ALK7;A0A2R8YG42;Q14155;E7EUY6;E9PDQ5;E7EU80;F6SJA5;C9JAD7;C9JDI6;B1ANY6;E7ENL8;Q15052	B1ALK7;A0A2R8YG42;Q14155;E7EUY6;E9PDQ5	79.831	21.8788	15.7681	15	15	15	35.9	35.9	35.9	50.533	9	0	ARHGEF7
RABGGTA	Geranylgeranyl transferase type-2 subunit alpha	Geranylgeranyl transferase type-2 subunit alpha;Geranylgeranyl transferase type-2 subunit alpha	Q92696;H0YLH3;H0YKP6;H0YLG7;H0YKZ8;H0YMG5	Q92696;H0YLH3	65.071	21.8755	NaN	14	14	14	30.9	30.9	30.9	60.659	6	0	RABGGTA
LCMT1	Leucine carboxyl methyltransferase 1	Leucine carboxyl methyltransferase 1;Leucine carboxyl methyltransferase 1 (Fragment)	Q9UIC8;I3L4A2;I3L2E3;I3L2Q8;I3L537;H3BUP7	Q9UIC8;I3L4A2	38.379	21.8709	NaN	10	10	10	43.1	43.1	43.1	24.547	3	0	LCMT1
CSDE1	Cold shock domain-containing protein E1	Cold shock domain-containing protein E1;Cold shock domain-containing protein E1	O75534;E9PLT0;E9PKN4;E9PLD4	O75534;E9PLT0	88.884	21.8655	NaN	16	16	16	25.3	25.3	25.3	77.356	11	0	CSDE1
GPHN	Gephyrin;Molybdopterin adenylyltransferase;Molybdopterin molybdenumtransferase	Gephyrin;Gephyrin;Gephyrin	Q9NQX3;F5H039;G3V582;H0YJ30;G3V4D2;G3V4R0;G3V355	Q9NQX3;F5H039;G3V582	79.748	21.8625	NaN	10	10	10	25.8	25.8	25.8	56.235	8	0	GPHN
AP1G1	AP-1 complex subunit gamma-1	AP-1 complex subunit gamma-1;AP-1 complex subunit gamma-1 (Fragment);AP-1 complex subunit gamma-1;AP-1 complex subunit gamma-1	O43747;H3BR36;H3BUN9;H3BNR4;H3BS13;H3BV30;H3BRM7;H3BN71;B4DGE1;H3BN75;B3KNW1	O43747;H3BR36;H3BUN9;H3BNR4	91.35	21.8593	15.1507	12	12	12	16.1	16.1	16.1	37.057	11	0	AP1G1
RHPN2	Rhophilin-2	Rhophilin-2	Q8IUC4;A8MT19;K7EL35	Q8IUC4	76.992	21.8581	NaN	15	15	15	29.3	29.3	29.3	39.466	15	0	RHPN2
GBF1	Golgi-specific brefeldin A-resistance guanine nucleotide exchange factor 1	Golgi-specific brefeldin A-resistance guanine nucleotide exchange factor 1	Q92538	Q92538	206.44	21.8554	NaN	28	28	28	21.7	21.7	21.7	101.83	18	0	GBF1
DDB1	DNA damage-binding protein 1	DNA damage-binding protein 1;DNA damage-binding protein 1	Q16531;F5GY55;F5H2L3;F5GWI0;F5GZY8;F5H198	Q16531;F5GY55	126.97	21.8479	15.7251	16	16	16	20.4	20.4	20.4	78.768	14	0	DDB1
IMPACT	Protein IMPACT	Protein IMPACT;Protein IMPACT	A0A3B3ITH3;Q9P2X3;J3QQU0;J3KT25	A0A3B3ITH3;Q9P2X3	37.452	21.8445	NaN	5	5	5	22.9	22.9	22.9	31.845	7	0	IMPACT
GYS1	Glycogen [starch] synthase, muscle	Glycogen [starch] synthase, muscle	P13807;M0QYU1	P13807	83.785	21.8346	NaN	11	11	11	25	25	25	47.274	6	0	GYS1
AOC1	Amiloride-sensitive amine oxidase [copper-containing]	Amiloride-sensitive amine oxidase [copper-containing]	P19801;C9J2J4;C9J0G8	P19801	85.377	21.8321	22.1376	23	23	23	31.3	31.3	31.3	77.348	5	14	AOC1
DTYMK	Thymidylate kinase	Thymidylate kinase;Thymidylate kinase (Fragment);Deoxythymidylate kinase (Thymidylate kinase), isoform CRA_d	P23919;H7C312;G5E9E9;H7C3A4;H7BZ20	P23919;H7C312;G5E9E9	23.819	21.8185	NaN	6	6	6	32.1	32.1	32.1	16.907	6	0	DTYMK
TRAFD1	TRAF-type zinc finger domain-containing protein 1	TRAF-type zinc finger domain-containing protein 1;TRAF-type zinc finger domain-containing protein 1 (Fragment)	O14545;F8VNX8;F8VVF3;F8VWK2;S4R2Z9	O14545;F8VNX8	64.84	21.8168	NaN	12	12	12	26.6	26.6	26.6	31.595	7	0	TRAFD1
NPR3	Atrial natriuretic peptide receptor 3	Atrial natriuretic peptide receptor 3;Atrial natriuretic peptide receptor 3	P17342;C9JK69;H0Y9B9;D6RDL8	P17342;C9JK69	59.807	21.8151	19.8389	6	6	6	11.8	11.8	11.8	14.032	1	1	NPR3
PFKP	ATP-dependent 6-phosphofructokinase, platelet type	ATP-dependent 6-phosphofructokinase, platelet type	Q01813;B1APP6;B1APP8;H0Y757;Q5VSR5;V9GYV7;H0Y3Y3	Q01813	85.595	21.8094	NaN	16	13	13	25.8	21	21	23.783	9	0	PFKP
FN1	Fibronectin;Anastellin;Ugl-Y1;Ugl-Y2;Ugl-Y3	Fibronectin	P02751;H0Y7Z1;H0Y4K8	P02751	262.62	21.8087	25.7286	81	81	81	35.8	35.8	35.8	323.31	14	101	FN1
RPS6KA3	Ribosomal protein S6 kinase alpha-3	Ribosomal protein S6 kinase alpha-3;Non-specific serine/threonine protein kinase;Non-specific serine/threonine protein kinase;Non-specific serine/threonine protein kinase;Ribosomal protein S6 kinase alpha-3 (Fragment)	P51812;B1AXG1;B7ZB17;B4DG22;A0A2R8Y603;B1AXG2;A0A2R8YGB7;D6RA62;D6RE03;F2Z2J1;Q15349	P51812;B1AXG1;B7ZB17;B4DG22;A0A2R8Y603	83.735	21.8084	NaN	16	14	14	29.7	27.2	27.2	65.714	10	0	RPS6KA3
CDH1	Cadherin-1;E-Cad/CTF1;E-Cad/CTF2;E-Cad/CTF3	Cadherin-1;Cadherin-1;Cadherin-1;Cadherin-1;Cadherin-1;Cadherin-1	A0A087WXI5;P12830;H3BVI7;H3BNC6;A0A087WX17;A0A087WU43;J3QKP1	A0A087WXI5;P12830;H3BVI7;H3BNC6;A0A087WX17;A0A087WU43	100.03	21.7943	17.3025	7	7	7	8.9	8.9	8.9	15.871	2	1	CDH1
PREP	Prolyl endopeptidase	Prolyl endopeptidase	P48147	P48147	80.699	21.7836	NaN	16	16	16	29.6	29.6	29.6	68.313	10	0	PREP
CARS	Cysteine--tRNA ligase, cytoplasmic	Cysteine--tRNA ligase, cytoplasmic;Cysteine--tRNA ligase, cytoplasmic	B4DKY1;P49589;E9PRS8;C9JLN0;E9PLP0	B4DKY1;P49589	84.277	21.7736	17.5116	11	11	11	19.5	19.5	19.5	29.093	10	0	CARS
PDPK1	3-phosphoinositide-dependent protein kinase 1	3-phosphoinositide-dependent protein kinase 1;3-phosphoinositide-dependent protein kinase 1	E9PER6;O15530;Q6A1A2;H3BQ10	E9PER6;O15530	60.328	21.7673	14.8792	9	9	9	21.7	21.7	21.7	19.45	8	0	PDPK1
SCARB1	Scavenger receptor class B member 1	SCARB1 protein;Scavenger receptor class B member 1;Scavenger receptor class B member 1	B7ZKQ9;F5H4X0;Q8WTV0	B7ZKQ9;F5H4X0;Q8WTV0	53.847	21.7614	16.3453	3	3	3	5.2	5.2	5.2	7.2897	4	0	SCARB1
PLA2G7	Platelet-activating factor acetylhydrolase	Platelet-activating factor acetylhydrolase	Q13093	Q13093	50.077	21.7612	19.2649	7	7	7	27.9	27.9	27.9	24.141	4	3	PLA2G7
EPRS	Bifunctional glutamate/proline--tRNA ligase;Glutamate--tRNA ligase;Proline--tRNA ligase	Bifunctional glutamate/proline--tRNA ligase;Bifunctional glutamate/proline--tRNA ligase (Fragment)	P07814;V9GYZ6	P07814;V9GYZ6	170.59	21.7516	16.8714	32	32	32	30.1	30.1	30.1	115.55	25	1	EPRS
TAB1	TGF-beta-activated kinase 1 and MAP3K7-binding protein 1	TGF-beta-activated kinase 1 and MAP3K7-binding protein 1	Q15750	Q15750	54.643	21.7486	NaN	8	8	8	25	25	25	39.4	9	0	TAB1
DARS	Aspartate--tRNA ligase, cytoplasmic	Aspartate--tRNA ligase, cytoplasmic;Aspartate--tRNA ligase, cytoplasmic (Fragment);Aspartate--tRNA ligase, cytoplasmic (Fragment)	P14868;C9J7S3;C9JLC1;C9JQM9;H7C278;H7BZ35	P14868;C9J7S3;C9JLC1	57.136	21.7439	15.8989	13	13	13	30.5	30.5	30.5	31.947	11	0	DARS
ZG16B	Zymogen granule protein 16 homolog B	Zymogen granule protein 16 homolog B;Zymogen granule protein 16 homolog B	A0A0C4DGN4;Q96DA0;I3L1H9;I3L3X0	A0A0C4DGN4;Q96DA0	19.6	21.7404	21.5179	5	5	5	31.5	31.5	31.5	9.8028	2	3	ZG16B
SWAP70	Switch-associated protein 70	Switch-associated protein 70;Switch-associated protein 70	Q9UH65;E7EMB1;E9PJM7;E9PJK8	Q9UH65;E7EMB1	68.997	21.7348	NaN	14	14	14	29.6	29.6	29.6	38.466	10	0	SWAP70
CTSH	Pro-cathepsin H;Cathepsin H mini chain;Cathepsin H;Cathepsin H heavy chain;Cathepsin H light chain	Pro-cathepsin H;Pro-cathepsin H;Pro-cathepsin H (Fragment)	A0A087X0D5;P09668;A0A3B3IRM7	A0A087X0D5;P09668;A0A3B3IRM7	36.269	21.7264	19.5091	14	14	10	45.8	45.8	29.7	38.261	3	5	CTSH
PPP2R5D	Serine/threonine-protein phosphatase 2A 56 kDa regulatory subunit delta isoform	Serine/threonine-protein phosphatase 2A 56 kDa regulatory subunit;Serine/threonine-protein phosphatase 2A 56 kDa regulatory subunit delta isoform;Serine/threonine-protein phosphatase 2A 56 kDa regulatory subunit delta isoform (Fragment)	E9PFR3;Q14738;H0Y8C4;Q96B13;H0YJ75;Q13362;H0YJ35;H7C5Q9;G3V2U3	E9PFR3;Q14738;H0Y8C4	69.116	21.7227	NaN	11	11	11	23.4	23.4	23.4	35.37	4	0	PPP2R5D
EPS15	Epidermal growth factor receptor substrate 15	Epidermal growth factor receptor substrate 15;Epidermal growth factor receptor substrate 15	P42566;B1AUU8;S4R3U1	P42566;B1AUU8	98.655	21.7197	NaN	11	11	11	18.3	18.3	18.3	47.562	8	0	EPS15
SERPINB5	Serpin B5	Serpin B5	P36952;C9JLM5	P36952	42.1	21.7105	NaN	7	7	7	27.7	27.7	27.7	53.142	4	0	SERPINB5
GLRX3	Glutaredoxin-3	Glutaredoxin-3	O76003	O76003	37.432	21.7066	NaN	9	9	9	35.8	35.8	35.8	39.944	1	0	GLRX3
C12orf10	UPF0160 protein MYG1, mitochondrial	UPF0160 protein MYG1, mitochondrial;UPF0160 protein MYG1, mitochondrial;UPF0160 protein MYG1, mitochondrial	Q9HB07;F8VR84;F8VQQ3;H3BPH3	Q9HB07;F8VR84;F8VQQ3	42.449	21.7064	NaN	9	9	9	29.3	29.3	29.3	14.986	1	0	C12orf10
GTPBP1	GTP-binding protein 1	GTP-binding protein 1	O00178;B0QY59;F5H716;H0YGA8;F5H257;F8WAZ4	O00178	72.453	21.706	NaN	11	11	11	23	23	23	25.112	3	0	GTPBP1
AOX1	Aldehyde oxidase	Aldehyde oxidase	Q06278;C9J244;H7C3Q1;H7BXF7;P47989	Q06278	147.92	21.6977	14.5055	23	23	23	23.6	23.6	23.6	83.384	13	1	AOX1
YES1	Non-specific protein-tyrosine kinase;Tyrosine-protein kinase Yes	Tyrosine-protein kinase;Tyrosine-protein kinase Yes	J3QRU1;P07947;P06241;Q573B4;P06239	J3QRU1;P07947	61.386	21.6955	21.748	15	8	8	33.6	22.6	22.6	15.623	11	0	YES1
EIF2B3	Translation initiation factor eIF-2B subunit gamma	Translation initiation factor eIF-2B subunit gamma	Q9NR50;H0Y580;A0A0D9SEN0	Q9NR50	50.24	21.6932	NaN	12	12	12	40.7	40.7	40.7	27.318	3	1	EIF2B3
MUC12	Mucin-12	Mucin-12	Q9UKN1;H7BXN1	Q9UKN1	558.16	21.6884	20.0982	14	14	14	2.8	2.8	2.8	102.78	14	7	MUC12
RPS9	40S ribosomal protein S9	40S ribosomal protein S9;40S ribosomal protein S9;40S ribosomal protein S9;40S ribosomal protein S9	A0A024R4M0;P46781;B5MCT8;C9JM19;F2Z3C0;A8MXK4	A0A024R4M0;P46781;B5MCT8;C9JM19	22.591	21.6797	NaN	10	10	10	32	32	32	10.899	4	0	RPS9
ADPRHL2	Poly(ADP-ribose) glycohydrolase ARH3	Poly(ADP-ribose) glycohydrolase ARH3	Q9NX46	Q9NX46	38.946	21.6787	NaN	5	5	5	18.2	18.2	18.2	22.123	4	0	ADPRHL2
SPG20	Spartin	Spartin	Q8N0X7	Q8N0X7	72.832	21.6758	NaN	8	8	8	17.4	17.4	17.4	16.321	6	0	SPG20
OXSR1	Serine/threonine-protein kinase OSR1	Serine/threonine-protein kinase OSR1;Serine/threonine-protein kinase OSR1	O95747;C9JIG9	O95747;C9JIG9	58.022	21.67	NaN	12	10	10	31.5	27.9	27.9	65.204	7	0	OXSR1
ADRBK1	Beta-adrenergic receptor kinase 1	Beta-adrenergic receptor kinase 1;G protein-coupled receptor kinase	P25098;E9PRV7	P25098;E9PRV7	79.573	21.6686	14.9288	14	14	11	25.8	25.8	19.9	40.033	13	0	ADRBK1
HSP90B1	Endoplasmin	Endoplasmin	P14625;Q96GW1;A0A1W2PRR1;H0YIV0;F8W026;Q58FF3	P14625	92.468	21.6657	22.4993	36	33	33	49.3	47.6	47.6	111.29	6	27	HSP90B1
PSMD2	26S proteasome non-ATPase regulatory subunit 2	26S proteasome non-ATPase regulatory subunit 2;26S proteasome non-ATPase regulatory subunit 2 (Fragment)	Q13200;H7C2Q3;C9JPC0;H7C1H2	Q13200;H7C2Q3	100.2	21.664	NaN	9	9	9	15.5	15.5	15.5	29.375	7	0	PSMD2
ENTPD3	Ectonucleoside triphosphate diphosphohydrolase 3	Ectonucleoside triphosphate diphosphohydrolase 3	O75355	O75355	59.105	21.6638	16.8345	9	9	9	14.6	14.6	14.6	19.375	4	0	ENTPD3
DNAJC7	DnaJ homolog subfamily C member 7	DnaJ homolog subfamily C member 7;DnaJ homolog subfamily C member 7 (Fragment);DnaJ homolog subfamily C member 7;DnaJ homolog subfamily C member 7 (Fragment);DnaJ homolog subfamily C member 7 (Fragment)	Q99615;K7EIH8;K7EPP7;K7ESP1;K7ER44;K7EJL5;K7EN19;K7EJV7;K7ELJ8;K7EJE9;K7EK03	Q99615;K7EIH8;K7EPP7;K7ESP1;K7ER44	56.44	21.6573	NaN	12	12	12	29.1	29.1	29.1	23.63	11	0	DNAJC7
AAK1	AP2-associated protein kinase 1	AP2-associated protein kinase 1;AP2-associated protein kinase 1	Q2M2I8;E9PG46;A0A096LP60	Q2M2I8;E9PG46	103.88	21.6556	NaN	11	11	10	19.6	19.6	15.6	73.221	8	0	AAK1
EIF3H	Eukaryotic translation initiation factor 3 subunit H	Eukaryotic translation initiation factor 3 subunit H;Eukaryotic translation initiation factor 3 subunit H;Eukaryotic translation initiation factor 3 subunit H;Eukaryotic translation initiation factor 3 subunit H (Fragment);Eukaryotic translation initiation	A0A087WZK9;O15372;B3KS98;E5RGU4;E5RHC7;E5RH59;E5RFH0;E5RFW7;E5RJT0	A0A087WZK9;O15372;B3KS98;E5RGU4;E5RHC7;E5RH59;E5RFH0	39.589	21.65	NaN	6	6	6	23.2	23.2	23.2	24.058	5	0	EIF3H
FAM175B	BRISC complex subunit Abro1	BRISC complex subunit Abraxas 2	Q15018	Q15018	46.9	21.634	NaN	6	6	6	16.6	16.6	16.6	24.138	4	0	FAM175B
BZW1	Basic leucine zipper and W2 domain-containing protein 1	Basic leucine zipper and W2 domain-containing protein 1;Basic leucine zipper and W2 domain-containing protein 1 (Fragment);Basic leucine zipper and W2 domain-containing protein 1 (Fragment)	Q7L1Q6;C9IZ80;C9JFN4;C9J188;C9JWF5;C9JV57;H0Y503	Q7L1Q6;C9IZ80;C9JFN4	48.043	21.6254	NaN	9	9	9	26	26	26	35.271	5	0	BZW1
DCAF11	DDB1- and CUL4-associated factor 11	DDB1- and CUL4-associated factor 11	Q8TEB1;H0YN92;H0YL98;H0YMZ4;H0YM56;H0YL64;H0YKR8;H0YM86;H0YNS2;H0YL77;H0YLQ1;H0YLF1;H0YLX7;H0YN03;H0YNK2;H0YN21;H0YNT0;H0YN15;H0YLH4;H0YMF7;H0YMN6;H0YL29;H0YLB2	Q8TEB1	61.669	21.5985	NaN	7	7	7	23.4	23.4	23.4	19.168	7	0	DCAF11
CTPS2	CTP synthase 2	CTP synthase 2	Q9NRF8	Q9NRF8	65.677	21.5957	16.1756	10	10	8	19.8	19.8	17.1	19.665	5	0	CTPS2
OSBPL9	Oxysterol-binding protein-related protein 9	Oxysterol-binding protein-related protein 9	Q96SU4;A0A096LPC8;H0YE19;E9PK98;G8JLK0	Q96SU4	83.184	21.5924	NaN	11	11	11	19.8	19.8	19.8	20.362	9	0	OSBPL9
PPT1	Palmitoyl-protein thioesterase 1	Palmitoyl-protein thioesterase 1;Palmitoyl-protein thioesterase 1;Palmitoyl-protein thioesterase 1;Palmitoyl-protein thioesterase 1;Palmitoyl-protein thioesterase 1;Palmitoyl-protein thioesterase 1 (Fragment)	A0A2C9F2P4;A0A286YFF7;P50897;Q5T0S4;A0A286YFE3;A0A286YFL8;E9PK48;E9PIA8;A0A286YFL6;E9PSE5	A0A2C9F2P4;A0A286YFF7;P50897;Q5T0S4;A0A286YFE3;A0A286YFL8	34.136	21.5924	21.7649	6	6	6	29.5	29.5	29.5	40.153	2	7	PPT1
STK38L	Serine/threonine-protein kinase 38-like	Serine/threonine-protein kinase 38-like;Serine/threonine-protein kinase 38-like (Fragment);Serine/threonine-protein kinase 38-like;Serine/threonine-protein kinase 38-like;Serine/threonine-protein kinase 38-like (Fragment);Serine/threonine-protein kinase 38	Q9Y2H1;F5H277;F5H5E6;F5H0V1;F5H7Z3;F5GY51	Q9Y2H1;F5H277;F5H5E6;F5H0V1;F5H7Z3;F5GY51	54.002	21.5866	NaN	4	4	3	12.9	12.9	10.3	11.803	5	0	STK38L
DLGAP4	Disks large-associated protein 4	Disks large-associated protein 4;Discs, large (Drosophila) homolog-associated protein 4, isoform CRA_b;Disks large-associated protein 4	Q9Y2H0;A0A0B4J2C2;F8WF49;A0A087X246;A0A087WWE6	Q9Y2H0;A0A0B4J2C2;F8WF49	108.01	21.5861	13.9145	7	7	7	11.2	11.2	11.2	19.3	7	0	DLGAP4
RUFY1	RUN and FYVE domain-containing protein 1	RUN and FYVE domain-containing protein 1	Q96T51;J3KPP6;H0Y9Y8	Q96T51	79.817	21.572	NaN	12	12	4	22.9	22.9	7.6	30.516	11	0	RUFY1
NOV	Protein NOV homolog	Protein NOV homolog	P48745	P48745	39.162	21.571	NaN	8	8	8	31.7	31.7	31.7	13.466	6	0	NOV
PNP	Purine nucleoside phosphorylase	Purine nucleoside phosphorylase	P00491	P00491	32.118	21.5613	NaN	6	6	6	32.9	32.9	32.9	30.803	4	0	PNP
BDH2	3-hydroxybutyrate dehydrogenase type 2	3-hydroxybutyrate dehydrogenase type 2;3-hydroxybutyrate dehydrogenase type 2;3-hydroxybutyrate dehydrogenase type 2 (Fragment);3-hydroxybutyrate dehydrogenase type 2 (Fragment)	Q9BUT1;D6RFG2;D6R9U8;D6RIR6;D6RBF6;D6R9P2	Q9BUT1;D6RFG2;D6R9U8;D6RIR6	26.724	21.549	NaN	3	3	3	22.9	22.9	22.9	14.138	3	0	BDH2
PSAP	Prosaposin;Saposin-A;Saposin-B-Val;Saposin-B;Saposin-C;Saposin-D	Prosaposin;Prosaposin;PSAP protein	C9JIZ6;P07602;Q5BJH1	C9JIZ6;P07602;Q5BJH1	58.44	21.5487	23.2438	9	9	9	24.7	24.7	24.7	44.717	8	12	PSAP
PRKCI	Protein kinase C iota type	Protein kinase C iota type	P41743	P41743	68.262	21.5473	NaN	5	5	5	12.2	12.2	12.2	20.978	5	0	PRKCI
RBBP7	Histone-binding protein RBBP7	Histone-binding protein RBBP7;Histone-binding protein RBBP7;Histone-binding protein RBBP7 (Fragment)	E9PC52;Q16576;Q5JP02;H0YEU5;H0YCT5;H0YF10;H0YDK2;C9JAJ9;Q5JNZ6;Q5JP01	E9PC52;Q16576;Q5JP02	46.938	21.5457	17.8039	6	6	3	23.8	23.8	17.1	26.699	5	1	RBBP7
PFAS	Phosphoribosylformylglycinamidine synthase	Phosphoribosylformylglycinamidine synthase	O15067;H0YGH1;J3QSG0;J3QSH6;J3KTL4;J3KTQ5;J3QL39	O15067	144.73	21.5106	14.3996	19	19	19	21.7	21.7	21.7	70.629	15	0	PFAS
GSK3A	Glycogen synthase kinase-3 alpha	Glycogen synthase kinase-3 alpha;Glycogen synthase kinase-3 alpha	P49840;A8MT37	P49840;A8MT37	50.98	21.4979	NaN	6	6	5	20.3	20.3	18.6	67.05	8	0	GSK3A
AGRN	Agrin;Agrin N-terminal 110 kDa subunit;Agrin C-terminal 110 kDa subunit;Agrin C-terminal 90 kDa fragment;Agrin C-terminal 22 kDa fragment	Agrin;Agrin	O00468;A0A087X208;H0Y5U1	O00468;A0A087X208	217.32	21.4752	25.7836	72	72	72	40.3	40.3	40.3	323.31	16	79	AGRN
ARHGEF37	Rho guanine nucleotide exchange factor 37	Rho guanine nucleotide exchange factor 37	A1IGU5;D6RJH4	A1IGU5	76.277	21.4732	NaN	10	10	10	21.8	21.8	21.8	40.003	10	0	ARHGEF37
MTMR12	Myotubularin-related protein 12	Myotubularin-related protein 12	Q9C0I1	Q9C0I1	86.147	21.4676	NaN	11	11	11	21.7	21.7	21.7	45.778	10	0	MTMR12
SLC3A2	4F2 cell-surface antigen heavy chain	4F2 cell-surface antigen heavy chain;4F2 cell-surface antigen heavy chain;4F2 cell-surface antigen heavy chain;4F2 cell-surface antigen heavy chain	F5GZS6;J3KPF3;P08195;F5GZI0;H0YFS2;H0YFX4;F5H867;F5H0E2	F5GZS6;J3KPF3;P08195;F5GZI0	64.872	21.4517	17.0726	9	9	9	20.2	20.2	20.2	25.901	5	0	SLC3A2
PPP1R13L	RelA-associated inhibitor	RelA-associated inhibitor	Q8WUF5;K7EN03;K7EPP1	Q8WUF5	89.09	21.4489	NaN	10	10	10	19	19	19	24.232	7	0	PPP1R13L
ABCF1	ATP-binding cassette sub-family F member 1	ATP-binding cassette sub-family F member 1;ATP-binding cassette sub-family F member 1 (Fragment)	Q8NE71;H0YGW7;Q5STZ8;F5GYK6;A0A0G2JIC2	Q8NE71;H0YGW7	95.925	21.4483	NaN	9	9	9	15.7	15.7	15.7	29.135	7	0	ABCF1
PRUNE2	Protein prune homolog 2	Protein prune homolog 2;Protein prune homolog 2;Protein prune homolog 2;Protein prune homolog 2 (Fragment)	A0A088AWP5;Q8WUY3;E9PDC2;H7BZH9;X6R9J3;A0A0C4DFM3;Q5JUB9;Q5JUB8	A0A088AWP5;Q8WUY3;E9PDC2;H7BZH9	337.6	21.4392	NaN	18	18	18	9.4	9.4	9.4	106.07	19	0	PRUNE2
SLC44A4	Choline transporter-like protein 4	Choline transporter-like protein 4;Choline transporter-like protein 4;Choline transporter-like protein 4 (Fragment);Choline transporter-like protein 4 (Fragment)	A0A0G2JL76;Q53GD3;H0Y5I3;A0A0G2JIN1	A0A0G2JL76;Q53GD3;H0Y5I3;A0A0G2JIN1	70.743	21.438	20.1693	4	4	4	5.2	5.2	5.2	8.1704	3	3	SLC44A4
UPF1	Regulator of nonsense transcripts 1	Regulator of nonsense transcripts 1	Q92900	Q92900	124.34	21.4368	NaN	20	20	20	28.7	28.7	28.7	60.71	11	0	UPF1
WDR37	WD repeat-containing protein 37	WD repeat-containing protein 37;WD repeat-containing protein 37	A0A3B3IT47;Q9Y2I8;E7EQ49;A0A087WTQ2;C9JGR9	A0A3B3IT47;Q9Y2I8	63.833	21.4346	17.6275	11	11	11	31.2	31.2	31.2	51.018	7	0	WDR37
RABGAP1	Rab GTPase-activating protein 1	Rab GTPase-activating protein 1	Q9Y3P9;F5H8L0;B7ZAP0;C9JGR5;A0A0U1RQV7;B5MCD9;E9PS63	Q9Y3P9	121.74	21.4334	16.1949	16	16	16	20.2	20.2	20.2	43.446	11	0	RABGAP1
PSMD1	26S proteasome non-ATPase regulatory subunit 1	26S proteasome non-ATPase regulatory subunit 1;26S proteasome non-ATPase regulatory subunit 1	Q99460;A0A087WW66;H7C378;H7BZR6;C9J9M4;F8WCE3	Q99460;A0A087WW66	105.84	21.4307	16.1942	17	17	17	29.2	29.2	29.2	51.827	6	0	PSMD1
TTC22	Tetratricopeptide repeat protein 22	Tetratricopeptide repeat protein 22	Q5TAA0	Q5TAA0	63.361	21.428	15.2387	7	7	7	17.4	17.4	17.4	12.94	2	1	TTC22
CD14	Monocyte differentiation antigen CD14;Monocyte differentiation antigen CD14, urinary form;Monocyte differentiation antigen CD14, membrane-bound form	Monocyte differentiation antigen CD14;Monocyte differentiation antigen CD14 (Fragment)	P08571;D6RFL4	P08571;D6RFL4	40.076	21.4239	NaN	7	7	7	32.8	32.8	32.8	22.596	6	0	CD14
IGKC	Ig kappa chain C region	Immunoglobulin kappa constant	P01834	P01834	11.765	21.421	22.5874	5	5	5	72.9	72.9	72.9	29.351	1	3	IGKC
HSPA5	78 kDa glucose-regulated protein	Endoplasmic reticulum chaperone BiP	P11021	P11021	72.332	21.4208	20.512	17	16	16	33.9	33.9	33.9	37.867	5	5	HSPA5
ICA1	Islet cell autoantigen 1	Islet cell autoantigen 1 (Fragment);Islet cell autoantigen 1;Islet cell autoantigen 1;Islet cell autoantigen 1;Islet cell autoantigen 1;Islet cell autoantigen 1, 69kDa, isoform CRA_h;Islet cell autoantigen 1 (Fragment)	B9ZVM7;E7ENI6;E9PDL4;A0A3B3IST8;Q05084;Q6LCR0;C9J3Y4;C9J8Y3	B9ZVM7;E7ENI6;E9PDL4;A0A3B3IST8;Q05084;Q6LCR0;C9J3Y4	30.113	21.4203	NaN	7	7	6	28.1	28.1	25	32.196	5	0	ICA1
DCAF7	DDB1- and CUL4-associated factor 7	DDB1- and CUL4-associated factor 7;DDB1- and CUL4-associated factor 7 (Fragment)	P61962;A0A087WWI6	P61962;A0A087WWI6	38.926	21.4151	NaN	4	4	4	18.4	18.4	18.4	12.449	6	0	DCAF7
ITCH	E3 ubiquitin-protein ligase Itchy homolog	E3 ubiquitin-protein ligase Itchy homolog	Q96J02;A0A1W2PR79	Q96J02	102.8	21.4023	16.4337	11	11	9	13.5	13.5	11.5	15.874	5	0	ITCH
COPB1	Coatomer subunit beta	Coatomer subunit beta;Coatomer subunit beta (Fragment)	P53618;E9PP73;E9PP63;E9PKQ1	P53618;E9PP73	107.14	21.3787	14.6326	11	11	11	17.4	17.4	17.4	67.461	6	0	COPB1
STK25	Serine/threonine-protein kinase 25	Serine/threonine-protein kinase 25;Serine/threonine-protein kinase 25 (Fragment)	O00506;H7C279;C9JDH9;C9J6L2;C9JCC0;C9J232;C9JJV0;C9JN58;E7EM58;C9JFA1	O00506;H7C279	48.111	21.3729	NaN	11	9	6	29.6	25.8	15.3	23.267	8	0	STK25
SPECC1	Cytospin-B	Cytospin-B	Q5M775;J3KSG2;J3QQM0;J3QS22;J3KRN9	Q5M775	118.58	21.3714	NaN	15	15	15	20.7	20.7	20.7	36.224	14	0	SPECC1
P4HB	Protein disulfide-isomerase	Protein disulfide-isomerase;Protein disulfide-isomerase;Protein disulfide-isomerase (Fragment);Protein disulfide-isomerase (Fragment)	P07237;H7BZ94;H0Y3Z3;I3L398;I3L4M2;I3NI03;I3L3U6;I3L312;I3L0S0;I3L514;I3L3P5	P07237;H7BZ94;H0Y3Z3;I3L398	57.116	21.3644	20.1546	15	15	15	34.3	34.3	34.3	39.657	4	5	P4HB
PGGT1B	Geranylgeranyl transferase type-1 subunit beta	Geranylgeranyl transferase type-1 subunit beta	P53609	P53609	42.368	21.3614	NaN	5	5	5	20.2	20.2	20.2	10.707	6	0	PGGT1B
AKAP10	A-kinase anchor protein 10, mitochondrial	A-kinase anchor protein 10, mitochondrial;A-kinase anchor protein 10, mitochondrial	E7EMD6;O43572;J3QL61;J3QRM7	E7EMD6;O43572	67.751	21.359	17.8736	9	9	9	22.2	22.2	22.2	53.965	6	0	AKAP10
DNM1L	Dynamin-1-like protein	Dynamin-1-like protein;Dynamin-1-like protein	O00429;G8JLD5;F8VZ52;F8W1W3;F8VUJ9;B4DDQ3;H0YI79;F8VR28;F8VYL3;B4DPZ9	O00429;G8JLD5	81.876	21.3589	NaN	18	18	18	37	37	37	53.612	13	0	DNM1L
TFCP2	Alpha-globin transcription factor CP2	Alpha-globin transcription factor CP2;Alpha-globin transcription factor CP2 (Fragment);Alpha-globin transcription factor CP2	Q12800;F8VWL0;F8VX55;C9JWL3	Q12800;F8VWL0;F8VX55	57.255	21.3537	NaN	4	4	3	12.9	12.9	9.4	19.113	2	0	TFCP2
CD55	Complement decay-accelerating factor	Complement decay-accelerating factor (Fragment);Complement decay-accelerating factor;Complement decay-accelerating factor;Complement decay-accelerating factor;CD55 antigen, decay accelerating factor for complement (Cromer blood group), isoform CRA_d	H3BLV0;B1AP13;H7BY55;P08174;B1AP15;A0A2R8YDY3;A0A2R8YEC5	H3BLV0;B1AP13;H7BY55;P08174;B1AP15	35.695	21.3514	16.8433	12	12	12	42	42	42	28.556	1	1	CD55
ACSS2	Acetyl-coenzyme A synthetase, cytoplasmic	Acetyl-coenzyme A synthetase, cytoplasmic	Q9NR19;C9J7L5;F8WDJ9;F8WCJ4;C9JXD9;C9IYL0;B4DEH9;C9JY31	Q9NR19	78.579	21.35	NaN	9	9	9	21.3	21.3	21.3	58.829	5	0	ACSS2
PLCD1	1-phosphatidylinositol 4,5-bisphosphate phosphodiesterase delta-1	1-phosphatidylinositol 4,5-bisphosphate phosphodiesterase delta-1	P51178	P51178	85.664	21.3468	NaN	7	7	7	13.8	13.8	13.8	33.348	7	0	PLCD1
SGSM2	Small G protein signaling modulator 2	Small G protein signaling modulator 2	O43147;V9GYJ0;I3L1Y7;V9GYD2;I3L361	O43147	113.28	21.3446	NaN	13	13	13	15.8	15.8	15.8	34.242	13	0	SGSM2
MPDZ	Multiple PDZ domain protein	Multiple PDZ domain protein;Multiple PDZ domain protein;Multiple PDZ domain protein (Fragment)	O75970;F5H1U9;H0YGQ3;B7ZB24;A0A075B6R8;F8WDQ8;F5H8D6;H0YH70	O75970;F5H1U9;H0YGQ3	221.62	21.3431	NaN	24	23	23	17.6	17.2	17.2	89.157	18	0	MPDZ
LANCL2	LanC-like protein 2	LanC-like protein 2	Q9NS86	Q9NS86	50.854	21.3345	16.3202	5	5	5	16	16	16	26.822	2	0	LANCL2
VTN	Vitronectin;Vitronectin V65 subunit;Vitronectin V10 subunit;Somatomedin-B	Vitronectin	P04004;CON__Q3ZBS7;H0YJW9	P04004	54.305	21.3071	24.3892	18	18	18	33.5	33.5	33.5	50.795	4	18	VTN
MYRIP	Rab effector MyRIP	Rab effector MyRIP	Q8NFW9;F8WFC5	Q8NFW9	95.705	21.303	NaN	11	11	11	19.9	19.9	19.9	27.658	8	0	MYRIP
SCIN	Adseverin	Adseverin	Q9Y6U3;E5RHN8;E5RHX6	Q9Y6U3	80.488	21.3002	NaN	7	7	7	18.6	18.6	18.6	57.649	4	0	SCIN
UBA6	Ubiquitin-like modifier-activating enzyme 6	Ubiquitin-like modifier-activating enzyme 6	A0AVT1;H0Y8S8	A0AVT1	117.97	21.2971	14.1899	20	20	20	29.4	29.4	29.4	64.928	5	0	UBA6
MARS	Methionine--tRNA ligase, cytoplasmic	Methionine--tRNA ligase, cytoplasmic	P56192;H0YHV5;H0YIP0;H0YIC2;F8VPL7;F8VS26;F8W0M7;F8W0S4;F8VZZ9;H0YI94;F5H2V6	P56192	101.11	21.2933	NaN	12	12	12	21.3	21.3	21.3	30.636	9	0	MARS
RAB4B	Ras-related protein Rab-4B	Ras-related protein Rab-4B;Ras-related protein Rab-4B (Fragment)	P61018;M0R0X1	P61018;M0R0X1	23.586	21.2843	NaN	7	5	3	38.5	30	20.7	8.4182	4	0	RAB4B
GPC4	Glypican-4;Secreted glypican-4	Glypican-4	O75487	O75487	62.411	21.2841	19.9343	10	10	9	27.7	27.7	24.6	26.511	3	1	GPC4
EIF2AK2	Interferon-induced, double-stranded RNA-activated protein kinase	Interferon-induced, double-stranded RNA-activated protein kinase	P19525;C9JZT2;F8WBH4	P19525	62.094	21.2739	NaN	5	5	5	14.9	14.9	14.9	17.961	4	0	EIF2AK2
DRG2	Developmentally-regulated GTP-binding protein 2	Developmentally-regulated GTP-binding protein 2;Developmentally-regulated GTP-binding protein 2;Developmentally-regulated GTP-binding protein 2	P55039;A8MZF9;J3QKW7;J3QRI9;J3QR71;J3QL90;J3KRL5;J3QKV7;J3QLF3	P55039;A8MZF9;J3QKW7	40.746	21.2727	NaN	11	11	10	34.1	34.1	31.6	27.687	6	0	DRG2
GNL1	Guanine nucleotide-binding protein-like 1	Guanine nucleotide-binding protein-like 1;Guanine nucleotide-binding protein-like 1 (Fragment)	P36915;A0A140T8Y2;A2AB27	P36915;A0A140T8Y2	68.66	21.2439	NaN	8	8	8	20.6	20.6	20.6	18.013	5	0	GNL1
ZPR1	Zinc finger protein ZPR1	Zinc finger protein ZPR1;Zinc finger protein ZPR1 (Fragment);Zinc finger protein ZPR1 (Fragment)	O75312;H7BZM7;H7C0E5	O75312;H7BZM7;H7C0E5	50.925	21.2397	NaN	9	9	9	32.5	32.5	32.5	45.829	8	0	ZPR1
CAB39L	Calcium-binding protein 39-like	Calcium-binding protein 39-like;Calcium-binding protein 39-like (Fragment);Calcium-binding protein 39-like (Fragment);Calcium-binding protein 39-like	Q9H9S4;Q5TAW7;B7ZBJ5;B7ZBJ4;B7ZBJ7;B7ZBJ6	Q9H9S4;Q5TAW7;B7ZBJ5;B7ZBJ4	39.087	21.2239	NaN	7	6	6	24	21.1	21.1	33.428	4	0	CAB39L
CALD1	Caldesmon	Caldesmon;Caldesmon;Caldesmon;Caldesmon (Fragment)	Q05682;E9PGZ1;E7EX44;C9J813	Q05682;E9PGZ1;E7EX44;C9J813	93.23	21.2235	NaN	8	8	8	15.1	15.1	15.1	15.921	7	0	CALD1
ANTXR2	Anthrax toxin receptor 2	Anthrax toxin receptor;Anthrax toxin receptor 2;Anthrax toxin receptor 2, isoform CRA_c	J3KPY9;P58335;A0A0C4DG84	J3KPY9;P58335;A0A0C4DG84	44.84	21.2204	NaN	6	6	6	16.5	16.5	16.5	19.166	6	0	ANTXR2
FAM84A	Protein FAM84A	Protein FAM84A	Q96KN4	Q96KN4	32.491	21.2182	NaN	4	4	4	16.8	16.8	16.8	14.104	5	0	FAM84A
DEPTOR	DEP domain-containing mTOR-interacting protein	DEP domain-containing mTOR-interacting protein	Q8TB45	Q8TB45	46.293	21.2155	NaN	7	7	7	32.8	32.8	32.8	21.101	2	0	DEPTOR
AIMP2	Aminoacyl tRNA synthase complex-interacting multifunctional protein 2	Aminoacyl tRNA synthase complex-interacting multifunctional protein 2;Aminoacyl tRNA synthase complex-interacting multifunctional protein 2	Q13155;A8MU58	Q13155;A8MU58	35.348	21.2146	NaN	6	6	6	24.7	24.7	24.7	27.605	3	0	AIMP2
SSH3	Protein phosphatase Slingshot homolog 3	Protein phosphatase Slingshot homolog 3	Q8TE77;E9PIT5;C9JUG3;A0A087WWG1	Q8TE77	72.995	21.2139	NaN	14	14	14	28.4	28.4	28.4	39.82	7	0	SSH3
PPID	Peptidyl-prolyl cis-trans isomerase D	Peptidyl-prolyl cis-trans isomerase D	Q08752;H0Y8J0	Q08752	40.763	21.2054	15.0429	8	8	8	30.5	30.5	30.5	11.493	4	0	PPID
TJP2	Tight junction protein ZO-2	Tight junction protein ZO-2;Tight junction protein ZO-2;Tight junction protein ZO-2 (Fragment);Tight junction protein ZO-2;Tight junction protein ZO-2;Tight junction protein ZO-2;Tight junction protein ZO-2 (Fragment);Tight junction protein ZO-2;Tight junc	A0A3B3IRI3;A0A3B3ISZ5;A0A3B3ITE1;A0A1B0GTW1;A0A2R8YDH4;Q9UDY2;A0A3B3IRV6;A0A3B3ISF1;A0A3B3IU51;A0A3B3IT83;A0A3B3IS03;U3KQJ2;A0A3B3IU26;B1AN86	A0A3B3IRI3;A0A3B3ISZ5;A0A3B3ITE1;A0A1B0GTW1;A0A2R8YDH4;Q9UDY2;A0A3B3IRV6;A0A3B3ISF1;A0A3B3IU51;A0A3B3IT83;A0A3B3IS03	126.95	21.202	NaN	19	19	19	26.3	26.3	26.3	53.008	11	0	TJP2
LMTK2	Serine/threonine-protein kinase LMTK2	Serine/threonine-protein kinase LMTK2	Q8IWU2	Q8IWU2	164.9	21.1987	NaN	9	9	9	11.2	11.2	11.2	57.948	6	0	LMTK2
EIF3A	Eukaryotic translation initiation factor 3 subunit A	Eukaryotic translation initiation factor 3 subunit A	Q14152	Q14152	166.57	21.1926	NaN	16	16	16	12	12	12	32.548	12	0	EIF3A
VPS26A	Vacuolar protein sorting-associated protein 26A	Vacuolar protein sorting-associated protein 26A	O75436;S4R3Q6	O75436	38.169	21.1906	NaN	5	5	4	19.9	19.9	17.7	10.942	3	0	VPS26A
ATP6AP2	Renin receptor	Renin receptor;Renin receptor;cDNA FLJ52527, highly similar to Renin receptor;Renin receptor;Renin receptor;Renin receptor;Renin receptor;Renin receptor;Renin receptor;Renin receptor (Fragment);Renin receptor;cDNA FLJ59846, highly similar to Renin receptor	A0A1B0GVC7;A0A1B0GU12;B7Z413;A0A1B0GTU8;A0A1B0GVB9;A0A1B0GVW0;A0A1C7CYW4;O75787;A0A1B0GUT7;A0A1B0GWD6;A0A1B0GVI9;B7Z1I9;A0A1B0GWJ8;H7C3E1;A0A1B0GTB0;A0A1B0GUV3;A0A1B0GVZ1;H7C240;A0A1B0GW13;A0A1B0GV60	A0A1B0GVC7;A0A1B0GU12;B7Z413;A0A1B0GTU8;A0A1B0GVB9;A0A1B0GVW0;A0A1C7CYW4;O75787;A0A1B0GUT7;A0A1B0GWD6;A0A1B0GVI9;B7Z1I9;A0A1B0GWJ8;H7C3E1;A0A1B0GTB0	27.54	21.1685	21.2302	9	9	9	37.6	37.6	37.6	39.11	3	3	ATP6AP2
EXPH5	Exophilin-5	Exophilin-5;Exophilin-5 (Fragment);Exophilin-5 (Fragment)	Q8NEV8;E9PPH6;F5GXG5;A0A087WZJ0;E9PIT1	Q8NEV8;E9PPH6;F5GXG5	222.52	21.1679	NaN	36	36	36	25	25	25	80.983	24	0	EXPH5
KIF1A	Kinesin-like protein KIF1A;Kinesin-like protein	Kinesin-like protein KIF1A;Kinesin-like protein KIF1A;Kinesin-like protein KIF1A;Kinesin-like protein KIF1A;Kinesin-like protein KIF1A;Kinesin-like protein KIF1A;Kinesin-like protein KIF1A;Kinesin-like protein KIF1A (Fragment);Kinesin-like protein KIF1A (F	A0A3B3IUA1;A0A3B3IU40;A0A3B3IT28;A0A3B3ITE5;A0A3B3ITF7;A0A3B3ITW6;Q12756;A0A3B3ITK3;F8W8V9;H7C0K6;H7C3Y8;A0A3B3ITW4	A0A3B3IUA1;A0A3B3IU40;A0A3B3IT28;A0A3B3ITE5;A0A3B3ITF7;A0A3B3ITW6;Q12756;A0A3B3ITK3;F8W8V9	192.13	21.1527	13.7678	22	22	19	21	21	18.1	98.679	17	0	KIF1A
TNKS1BP1	182 kDa tankyrase-1-binding protein	182 kDa tankyrase-1-binding protein	Q9C0C2;A0A2R8Y5C4;E9PKK0	Q9C0C2	181.79	21.143	NaN	30	30	30	28.6	28.6	28.6	96.432	21	0	TNKS1BP1
SEC23B	Protein transport protein Sec23B	Protein transport protein SEC23;Protein transport protein Sec23B;Protein transport protein SEC23 (Fragment)	A0A2R8YFH5;Q15437;Q5QPE2;A0A2R8Y633;A0A2R8Y7S7;A0A2R8YF30;Q5QPE1;G3V4V1;G3V1W4;G3V3G5;G3V2R6;G3V5K1;G3V5X8;G3V4Q2	A0A2R8YFH5;Q15437;Q5QPE2	84.472	21.1394	NaN	12	12	10	26.2	26.2	23.2	26.099	4	0	SEC23B
NAE1	NEDD8-activating enzyme E1 regulatory subunit	NEDD8-activating enzyme E1 regulatory subunit	Q13564;H3BSS8;H3BMN8;H3BQ16;H3BS69;H3BMR3;J3QLH4;J3KRK3;H3BQW6	Q13564	60.246	21.1234	NaN	5	5	5	17.4	17.4	17.4	15.608	4	0	NAE1
UBE2O	E2/E3 hybrid ubiquitin-protein ligase UBE2O	(E3-independent) E2 ubiquitin-conjugating enzyme;(E3-independent) E2 ubiquitin-conjugating enzyme (Fragment)	Q9C0C9;K7ES11;K7EQ12	Q9C0C9;K7ES11	141.29	21.1158	NaN	16	16	16	19	19	19	63.621	11	0	UBE2O
UNC45A	Protein unc-45 homolog A	Protein unc-45 homolog A;Protein unc-45 homolog A	A0A1W2PNX8;Q9H3U1	A0A1W2PNX8;Q9H3U1	118.39	21.1119	NaN	22	22	22	27	27	27	54.287	13	0	UNC45A
EIF2A	Eukaryotic translation initiation factor 2A;Eukaryotic translation initiation factor 2A, N-terminally processed	Eukaryotic translation initiation factor 2A;Eukaryotic translation initiation factor 2A;Eukaryotic translation initiation factor 2A (Fragment);Eukaryotic translation initiation factor 2A (Fragment)	F8WAE5;Q9BY44;H7C5Q3;C9IZE1;H7C5R5;F8WF18;F8WAT3	F8WAE5;Q9BY44;H7C5Q3;C9IZE1	64.449	21.108	NaN	9	9	9	24.5	24.5	24.5	34.029	8	0	EIF2A
SCYL1	N-terminal kinase-like protein	N-terminal kinase-like protein;N-terminal kinase-like protein;N-terminal kinase-like protein;N-terminal kinase-like protein;N-terminal kinase-like protein (Fragment);N-terminal kinase-like protein	E9PS17;E9PK59;Q96KG9;E9PPN3;H0YCI6;A0A0A0MQX4	E9PS17;E9PK59;Q96KG9;E9PPN3;H0YCI6;A0A0A0MQX4	85.718	21.1069	NaN	13	13	13	22.5	22.5	22.5	29.274	5	0	SCYL1
NUCB1	Nucleobindin-1	Nucleobindin-1;Nucleobindin-1 (Fragment);Nucleobindin-1 (Fragment)	Q02818;C9JKZ2;H7BZI1;C9JBD3;C9J3C1	Q02818;C9JKZ2;H7BZI1	53.879	21.0998	22.2218	21	20	20	44	42.3	42.3	51.93	1	14	NUCB1
RAB11FIP5	Rab11 family-interacting protein 5	Rab11 family-interacting protein 5;Rab11 family-interacting protein 5	A0A1B0GTL5;Q9BXF6	A0A1B0GTL5;Q9BXF6	138.41	21.0921	NaN	12	12	12	14	14	14	27.481	11	0	RAB11FIP5
NEK9	Serine/threonine-protein kinase Nek9	Serine/threonine-protein kinase Nek9	Q8TD19;G3V459	Q8TD19	107.17	21.0912	NaN	14	14	14	22.3	22.3	22.3	57.274	9	0	NEK9
TBC1D15	TBC1 domain family member 15	TBC1 domain family member 15;TBC1 domain family member 15 (Fragment)	Q8TC07;C9JA93;F8WCB5;F8WDJ1;F8WF35;F8VV61;F8WAX5	Q8TC07;C9JA93	79.49	21.0836	NaN	10	10	10	20.3	20.3	20.3	20.656	7	0	TBC1D15
MLLT4	Afadin	Afadin;Afadin;Afadin	J3KN01;P55196;Q5TIG5	J3KN01;P55196;Q5TIG5	207.62	21.0786	16.2328	31	31	1	25.1	25.1	0.7	74.317	13	0	MLLT4
EIF5B	Eukaryotic translation initiation factor 5B	Eukaryotic translation initiation factor 5B;Eukaryotic translation initiation factor 5B	A0A087WUT6;O60841	A0A087WUT6;O60841	138.68	21.0703	NaN	9	9	9	13.3	13.3	13.3	48.586	5	0	EIF5B
AP3D1	AP-3 complex subunit delta-1	AP-3 complex subunit delta-1;AP-3 complex subunit delta-1 (Fragment)	O14617;A0A2R8Y611;A0A2R8Y4J3;A0A087WYN6	O14617;A0A2R8Y611	130.16	21.0662	NaN	11	11	11	13.8	13.8	13.8	43.864	8	0	AP3D1
PTPN23	Tyrosine-protein phosphatase non-receptor type 23	Tyrosine-protein phosphatase non-receptor type 23	Q9H3S7;C9JD91	Q9H3S7	178.97	21.053	NaN	14	14	14	11.1	11.1	11.1	33.016	7	0	PTPN23
REPS1	RalBP1-associated Eps domain-containing protein 1	RalBP1-associated Eps domain-containing protein 1;RalBP1-associated Eps domain-containing protein 1 (Fragment);RalBP1-associated Eps domain-containing protein 1	Q96D71;H0YDT0;E9PMG1;H0YE89;H0YCR2;F2Z3L2;H0YE73	Q96D71;H0YDT0;E9PMG1	86.661	21.0422	NaN	9	8	8	16.3	16.3	16.3	27.497	11	0	REPS1
CANT1	Soluble calcium-activated nucleotidase 1	Soluble calcium-activated nucleotidase 1	Q8WVQ1	Q8WVQ1	44.839	21.04	20.123	6	6	6	22.4	22.4	22.4	17.092	1	3	CANT1
VIM	Vimentin	Vimentin;Vimentin variant 3;Vimentin variant 4	P08670;B0YJC4;B0YJC5;A0A1B0GTT5;A0A1B0GVG8	P08670;B0YJC4;B0YJC5	53.651	21.0366	19.2758	12	10	9	36.7	35.2	32.6	28.469	3	2	VIM
FAM168A	Protein FAM168A	Protein FAM168A	Q92567	Q92567	26.184	21.0365	23.146	7	7	7	59.8	59.8	59.8	19.821	0	6	FAM168A
ROCK2	Rho-associated protein kinase 2	Rho-associated protein kinase 2;Rho-associated protein kinase 2	O75116;E9PF63;D6REE7;Q14DU5	O75116;E9PF63	160.9	21.0158	NaN	15	10	10	13.3	10.3	10.3	42.842	9	0	ROCK2
IQGAP2	Ras GTPase-activating-like protein IQGAP2	Ras GTPase-activating-like protein IQGAP2;Ras GTPase-activating-like protein IQGAP2 (Fragment);Ras GTPase-activating-like protein IQGAP2;Ras GTPase-activating-like protein IQGAP2 (Fragment)	Q13576;E7EWC2;F5H7S7;D6R939;E9PDT6;D6RDK8;D6RGC6;D6R999	Q13576;E7EWC2;F5H7S7;D6R939	180.58	21.0046	13.4741	13	13	13	12.8	12.8	12.8	48.968	9	0	IQGAP2
LIFR	Leukemia inhibitory factor receptor	Leukemia inhibitory factor receptor	P42702;D6RF33	P42702	123.74	21.0029	17.5832	13	13	13	13.3	13.3	13.3	63.486	8	2	LIFR
RAP1GAP	Rap1 GTPase-activating protein 1	RAP1, GTPase activating protein 1, isoform CRA_e;Rap1 GTPase-activating protein 1;Rap1 GTPase-activating protein 1;Rap1 GTPase-activating protein 1;Rap1 GTPase-activating protein 1	J3KPC5;X6R8W7;P47736;F2Z357;A0A0A0MQY8;Q5T3T1	J3KPC5;X6R8W7;P47736;F2Z357;A0A0A0MQY8	76.719	21.0014	NaN	8	8	8	24.5	24.5	24.5	24.135	2	0	RAP1GAP
C6orf132	Uncharacterized protein C6orf132	Uncharacterized protein C6orf132	Q5T0Z8	Q5T0Z8	124.03	21	NaN	13	13	13	15.9	15.9	15.9	38.565	11	0	C6orf132
GRIPAP1	GRIP1-associated protein 1	GRIP1-associated protein 1;GRIP1-associated protein 1;GRIP1-associated protein 1	A0A087WT45;Q4V328;A0A075B793;A0A087WXA6	A0A087WT45;Q4V328;A0A075B793	90.856	20.9952	14.1828	8	8	8	17.7	17.7	17.7	26.179	5	0	GRIPAP1
DHPS	Deoxyhypusine synthase	Deoxyhypusine synthase;Deoxyhypusine synthase;Deoxyhypusine synthase;Deoxyhypusine synthase;Deoxyhypusine synthase;Uncharacterized protein;Deoxyhypusine synthase	P49366;A0A087WZK0;Q5J8M5;M0R253;M0QX43;A0A3B3IU31;B4E3M2;M0R264;M0R0J4;M0QYZ7;M0R1T4;M0R0V2	P49366;A0A087WZK0;Q5J8M5;M0R253;M0QX43;A0A3B3IU31;B4E3M2	40.97	20.9827	NaN	9	9	9	43.9	43.9	43.9	28.722	5	0	DHPS
IDE	Insulin-degrading enzyme	Insulin-degrading enzyme;Insulin-degrading enzyme	A0A3B3ISG5;P14735;Q5T5N3	A0A3B3ISG5;P14735	117.94	20.9687	NaN	11	11	11	14.8	14.8	14.8	27.563	7	0	IDE
LAMB2	Laminin subunit beta-2	Laminin subunit beta-2	P55268;F5H520;C9JMJ0;A4D0S4	P55268	195.98	20.96	24.9186	98	98	98	59	59	59	323.31	7	94	LAMB2
ATP8B1	Phospholipid-transporting ATPase IC	Phospholipid-transporting ATPase IC;Phospholipid-transporting ATPase	O43520;A0A2R8Y5C5;A0A3B3IRQ1	O43520;A0A2R8Y5C5	143.69	20.9575	NaN	10	10	10	9.6	9.6	9.6	19.271	6	0	ATP8B1
SYTL2		Synaptotagmin-like protein 2;Synaptotagmin-like protein 2 (Fragment)	A0A0U1RR07;A0A0U1RQP0;A0A0U1RQH1;A0A0U1RRJ3;E9PS29;E9PS39;E9PK22;E9PRW5;E9PQL8;E9PPL3	A0A0U1RR07;A0A0U1RQP0	247.31	20.9416	NaN	26	26	12	19.7	19.7	9.9	92.004	19	0	SYTL2
RAP1GDS1	Rap1 GTPase-GDP dissociation stimulator 1	Rap1 GTPase-GDP dissociation stimulator 1;Rap1 GTPase-GDP dissociation stimulator 1 (Fragment)	P52306;D6RHH8;D6RBC6;D6RHZ7;D6RB97;D6REZ0;D6RC12	P52306;D6RHH8	66.316	20.9398	NaN	7	7	7	20.1	20.1	20.1	44.621	8	0	RAP1GDS1
PLOD1	Procollagen-lysine,2-oxoglutarate 5-dioxygenase 1	Procollagen-lysine,2-oxoglutarate 5-dioxygenase 1	Q02809;Q5JXB7;Q5JXB8	Q02809	83.549	20.9397	21.9996	31	31	31	47.3	47.3	47.3	145.43	7	25	PLOD1
SPAG9	C-Jun-amino-terminal kinase-interacting protein 4	C-Jun-amino-terminal kinase-interacting protein 4;C-Jun-amino-terminal kinase-interacting protein 4	O60271;A0A087X2D8;H0YBE9;H0YBS5;E9PFH7;A0A087WYG2;Q9UPT6	O60271;A0A087X2D8	146.2	20.9382	NaN	12	12	12	15.1	15.1	15.1	48.638	13	0	SPAG9
MVP	Major vault protein	Major vault protein	Q14764;H3BRL2;H3BQK6;H3BP76;H3BUK7;H3BNF6;H3BPZ2;H3BNF2;H3BUP3;H3BQE7	Q14764	99.326	20.9333	18.2071	19	19	19	27.9	27.9	27.9	56.909	6	2	MVP
UBA7	Ubiquitin-like modifier-activating enzyme 7	Ubiquitin-like modifier-activating enzyme 7	P41226	P41226	111.69	20.9094	NaN	9	9	9	15.4	15.4	15.4	18.49	5	0	UBA7
ARAF	Serine/threonine-protein kinase A-Raf	ARAF protein;Serine/threonine-protein kinase A-Raf	Q96II5;P10398;H7C4S5;A0A2R8Y492	Q96II5;P10398	67.925	20.9087	NaN	12	12	10	29.1	29.1	25.5	22.543	6	0	ARAF
HIST1H2BC	Histone H2B type 1-C/E/F/G/I;Histone H2B type F-S;Histone H2B type 1-K	Histone H2B type 1-C/E/F/G/I;Histone H2B type F-S;Histone H2B type 1-K	P62807;P57053;O60814	P62807;P57053;O60814	13.906	20.9062	21.4553	13	13	0	72.2	72.2	0	68.102	0	2	HIST1H2BC
ATXN10	Ataxin-10	Ataxin-10;Ataxin-10	Q9UBB4;A0A1W2PQD2;B1AHE3;B1AHE4	Q9UBB4;A0A1W2PQD2	53.488	20.9019	NaN	6	6	6	20.6	20.6	20.6	62.86	4	0	ATXN10
IPO7	Importin-7	Importin-7	O95373;E9PLJ0	O95373	119.52	20.9015	NaN	7	7	7	10.5	10.5	10.5	59.876	4	0	IPO7
IGLL5	Ig lambda-1 chain C regions;Immunoglobulin lambda-like polypeptide 5	Immunoglobulin lambda constant 3;Immunoglobulin lambda constant 2;Immunoglobulin lambda-like polypeptide 5;Immunoglobulin lambda constant 1;Immunoglobulin lambda-like polypeptide 5	P0DOY3;P0DOY2;A0A0B4J231;P0CG04;B9A064;P0CF74	P0DOY3;P0DOY2;A0A0B4J231;P0CG04;B9A064	11.265	20.8934	22.7889	4	4	4	40.6	40.6	40.6	80.465	2	4	IGLL5
MON2	Protein MON2 homolog	Protein MON2 homolog;Protein MON2 homolog;Protein MON2 homolog	A0A286YFF8;Q7Z3U7;F8VZV1;F8VZV6;F8VQS2	A0A286YFF8;Q7Z3U7;F8VZV1	190.48	20.8921	14.3892	14	14	14	9.8	9.8	9.8	28.343	7	0	MON2
EIF3B	Eukaryotic translation initiation factor 3 subunit B	Eukaryotic translation initiation factor 3 subunit B	P55884;C9JQN7;C9JZG1	P55884	92.48	20.8845	17.9599	16	16	16	24.6	24.6	24.6	51.416	7	0	EIF3B
CUL3	Cullin-3	Cullin-3;Cullin-3	Q13618;A0A087WTG3;H7C399	Q13618;A0A087WTG3	88.929	20.8829	NaN	9	9	9	13.4	13.4	13.4	15.53	5	0	CUL3
PDE11A	Dual 3,5-cyclic-AMP and -GMP phosphodiesterase 11A	Dual 3,5-cyclic-AMP and -GMP phosphodiesterase 11A	Q9HCR9;H7C4D0;H0Y6P9	Q9HCR9	104.75	20.8737	NaN	16	16	16	23.2	23.2	23.2	39.529	7	0	PDE11A
HIST1H4A	Histone H4	Histone H4	P62805	P62805	11.367	20.8613	22.5233	15	15	15	58.3	58.3	58.3	51.42	0	4	HIST1H4A
TBC1D9B	TBC1 domain family member 9B	TBC1 domain family member 9B;KIAA0676 protein, isoform CRA_d	Q66K14;G3V133;Q6ZT07	Q66K14;G3V133	140.52	20.856	NaN	13	13	13	16.2	16.2	16.2	52.342	11	0	TBC1D9B
CRYBG3	Very large A-kinase anchor protein	Very large A-kinase anchor protein	Q68DQ2	Q68DQ2	330.63	20.8523	15.5724	33	33	33	17.4	17.4	17.4	100.96	28	0	CRYBG3
HEXA	Beta-hexosaminidase;Beta-hexosaminidase subunit alpha	Beta-hexosaminidase;Beta-hexosaminidase subunit alpha;Beta-hexosaminidase	H3BP20;P06865;H3BS10;H3BU85;H3BTD4;A0A087WUJ7	H3BP20;P06865;H3BS10	61.999	20.8468	21.9827	11	11	11	21.1	21.1	21.1	32.905	2	9	HEXA
TRPV1	Sedoheptulokinase	Uncharacterized protein;Sedoheptulokinase	A0A0B4J2A0;Q9UHJ6	A0A0B4J2A0;Q9UHJ6	51.504	20.8376	NaN	5	5	5	16.7	16.7	16.7	24.511	5	0	TRPV1
RIC8A	Synembryn-A	Synembryn-A	Q9NPQ8;H0YC88;H0YE35;H0YEN0;E9PI04;E9PSI0	Q9NPQ8	59.709	20.8375	NaN	8	8	8	22	22	22	50.559	6	0	RIC8A
LYN	Tyrosine-protein kinase Lyn	Tyrosine-protein kinase Lyn	P07948;H0Y3C5;J3KPD6;F6SF04;P08631;E5RJ37	P07948	58.573	20.8297	NaN	13	12	12	31.4	30.1	30.1	20.45	8	0	LYN
HUWE1	E3 ubiquitin-protein ligase HUWE1	E3 ubiquitin-protein ligase HUWE1	Q7Z6Z7;H0Y659;A0A1B0GXC7;A0A087X146	Q7Z6Z7	481.89	20.8208	NaN	34	34	34	11.7	11.7	11.7	237.98	24	0	HUWE1
MGEA5	Protein O-GlcNAcase	Protein O-GlcNAcase;Protein O-GlcNAcase (Fragment)	O60502;H7C3X0	O60502;H7C3X0	102.91	20.8206	NaN	12	12	12	15.6	15.6	15.6	25.873	7	0	MGEA5
ADAM10	Disintegrin and metalloproteinase domain-containing protein 10	Disintegrin and metalloproteinase domain-containing protein 10	O14672;H3BS53	O14672	84.141	20.816	22.108	16	16	16	31.4	31.4	31.4	42.743	4	12	ADAM10
MAP3K7	Mitogen-activated protein kinase kinase kinase 7	Mitogen-activated protein kinase kinase kinase 7;Mitogen-activated protein kinase kinase kinase 7	O43318;Q9UG54	O43318;Q9UG54	67.195	20.8096	NaN	8	8	8	17.8	17.8	17.8	27.09	4	0	MAP3K7
LSS	Lanosterol synthase	Lanosterol synthase;Lanosterol synthase (Fragment)	P48449;A0A0G2JQD0;C9J315	P48449;A0A0G2JQD0	83.308	20.797	NaN	11	11	11	18	18	18	14.457	5	0	LSS
SKIV2L	Helicase SKI2W	Helicase SKI2W	Q15477;H7C5N0;H7C4L3;F8WDE8;B4E0B4	Q15477	137.75	20.7922	NaN	17	17	17	21.8	21.8	21.8	63.004	8	0	SKIV2L
ENPP3	Ectonucleotide pyrophosphatase/phosphodiesterase family member 3;Alkaline phosphodiesterase I;Nucleotide pyrophosphatase	Ectonucleotide pyrophosphatase/phosphodiesterase family member 3;Ectonucleotide pyrophosphatase/phosphodiesterase family member 3	O14638;F8W6H5	O14638;F8W6H5	100.12	20.7897	14.9742	28	28	28	35.2	35.2	35.2	93.605	8	0	ENPP3
IQSEC1	IQ motif and SEC7 domain-containing protein 1	IQ motif and SEC7 domain-containing protein 1;IQ motif and SEC7 domain-containing protein 1;IQ motif and SEC7 domain-containing protein 1;IQ motif and SEC7 domain-containing protein 1;IQ motif and SEC7 domain-containing protein 1 (Fragment);IQ motif and SE	A0A2R8Y7T6;A0A087WWK8;A0A3B3IRZ4;Q6DN90;A0A2R8Y695;A0A3B3IU98;A0A0C4DGT3;A0A1W2PR28;Q5JU85;A0A1W2PR18;A0A1W2PRJ5;A0A0G2JLG2;Q9UPP2	A0A2R8Y7T6;A0A087WWK8;A0A3B3IRZ4;Q6DN90;A0A2R8Y695;A0A3B3IU98;A0A0C4DGT3	108.42	20.7731	NaN	10	10	10	14.5	14.5	14.5	29.397	5	0	IQSEC1
GDF15	Growth/differentiation factor 15	Growth/differentiation factor 15	Q99988;A0A0A0MTT8	Q99988	34.14	20.7662	18.3075	5	5	5	25	25	25	12.901	4	1	GDF15
DFFA	DNA fragmentation factor subunit alpha	DNA fragmentation factor subunit alpha;DNA fragmentation factor subunit alpha	O00273;K7ERT1	O00273;K7ERT1	36.521	20.7618	NaN	9	9	9	23.9	23.9	23.9	14.353	5	0	DFFA
CSNK2A2	Casein kinase II subunit alpha	Casein kinase II subunit alpha;Casein kinase II subunit alpha (Fragment)	P19784;H3BSA1;H3BV19;H3BNI9	P19784;H3BSA1	41.213	20.7539	16.4421	10	10	10	42	42	42	38.391	2	0	CSNK2A2
CAPN7	Calpain-7	Calpain-7	Q9Y6W3;F8WCZ1;F8WDQ3	Q9Y6W3	92.651	20.7467	NaN	10	10	10	15.3	15.3	15.3	21.263	7	0	CAPN7
PYGL	Glycogen phosphorylase, liver form;Alpha-1,4 glucan phosphorylase	Glycogen phosphorylase, liver form;Alpha-1,4 glucan phosphorylase	P06737;E9PK47	P06737;E9PK47	97.147	20.7386	NaN	25	17	17	32.5	24.7	24.7	35.832	8	0	PYGL
GANAB	Neutral alpha-glucosidase AB	Neutral alpha-glucosidase AB;Neutral alpha-glucosidase AB;Neutral alpha-glucosidase AB	Q14697;F5H6X6;E9PKU7;E9PNH1	Q14697;F5H6X6;E9PKU7	106.87	20.7379	23.1309	27	27	27	34.9	34.9	34.9	115.98	2	23	GANAB
PLA1A	Phospholipase A1 member A	Phospholipase A1 member A, isoform CRA_b;Phospholipase A1 member A	G5E9W0;Q53H76;H7C4H1	G5E9W0;Q53H76	48.084	20.7331	22.9239	9	9	9	22	22	22	38.028	2	10	PLA1A
SEC23IP	SEC23-interacting protein	SEC23-interacting protein;SEC23-interacting protein	Q9Y6Y8;A0A0C4DH82;H7C0V8;H7C4C4	Q9Y6Y8;A0A0C4DH82	111.08	20.7211	NaN	9	9	9	13.2	13.2	13.2	19.219	4	0	SEC23IP
ARIH1	E3 ubiquitin-protein ligase ARIH1	E3 ubiquitin-protein ligase ARIH1;RBR-type E3 ubiquitin transferase (Fragment)	Q9Y4X5;H3BNB9;H3BSK4;A0A087WT96	Q9Y4X5;H3BNB9	64.117	20.7111	NaN	7	7	7	19.6	19.6	19.6	29.042	2	0	ARIH1
BAG3	BAG family molecular chaperone regulator 3	BAG family molecular chaperone regulator 3;BAG family molecular chaperone regulator 3 (Fragment)	O95817;C9JFK9	O95817;C9JFK9	61.594	20.7032	NaN	9	9	9	24.7	24.7	24.7	32.083	8	0	BAG3
NEU1	Sialidase-1	Sialidase-1;Sialidase-1	Q99519;E9PIF4	Q99519;E9PIF4	45.467	20.6992	22.7356	11	11	11	34.2	34.2	34.2	41.063	1	12	NEU1
GNE	Bifunctional UDP-N-acetylglucosamine 2-epimerase/N-acetylmannosamine kinase;UDP-N-acetylglucosamine 2-epimerase (hydrolyzing);N-acetylmannosamine kinase	Bifunctional UDP-N-acetylglucosamine 2-epimerase/N-acetylmannosamine kinase	Q9Y223	Q9Y223	79.274	20.6841	NaN	8	8	8	13.7	13.7	13.7	19.803	5	0	GNE
EEF2K	Eukaryotic elongation factor 2 kinase	Eukaryotic elongation factor 2 kinase	O00418;H3BRH4	O00418	82.143	20.668	NaN	8	8	8	16.7	16.7	16.7	26.604	6	0	EEF2K
CYR61	Protein CYR61	Protein CYR61	O00622	O00622	42.026	20.6662	19.7093	5	5	5	10.5	10.5	10.5	11.767	4	1	CYR61
EXOC2	Exocyst complex component 2	Exocyst complex component 2	Q96KP1;Q2MDF5	Q96KP1	104.07	20.646	NaN	10	10	10	13.5	13.5	13.5	30.736	7	0	EXOC2
GCNT2	N-acetyllactosaminide beta-1,6-N-acetylglucosaminyl-transferase, isoform A	N-acetyllactosaminide beta-1,6-N-acetylglucosaminyl-transferase	Q8N0V5;B7ZBL3;A0A1W2PRW1	Q8N0V5	45.873	20.6432	22.7754	10	10	10	26.9	26.9	26.9	72.724	2	9	GCNT2
CDC42BPB	Serine/threonine-protein kinase MRCK beta	Serine/threonine-protein kinase MRCK beta	Q9Y5S2;H0YLY0;H0Y6V3;H0Y7V8;A0A0A0MRJ1;H0Y5V1;A0A0A0MRJ0;Q5VT25	Q9Y5S2	194.31	20.6431	15.3244	23	23	23	16.8	16.8	16.8	67.38	17	1	CDC42BPB
PRKD1	Serine/threonine-protein kinase D1;Serine/threonine-protein kinase	Serine/threonine-protein kinase D1;Serine/threonine-protein kinase	Q15139;F8WBA3;H0YHL5	Q15139;F8WBA3	101.7	20.6344	NaN	9	9	6	14.1	14.1	10	24.974	2	0	PRKD1
CUL4A	Cullin-4A	Cullin-4A;Cullin-4A	Q13619;A0A0A0MR50;K4DI93;Q13620;A0A087WWN2;A6NE76	Q13619;A0A0A0MR50	87.679	20.6207	19.5164	14	14	14	24.2	24.2	24.2	32.828	5	0	CUL4A
TSC2	Tuberin	Tuberin (Fragment);Tuberin;Tuberin;Tuberin (Fragment);Tuberin;Tuberin;Tuberin;Tuberin (Fragment);Tuberin;Tuberin;Tuberin	A0A2R8Y6C9;A0A2R8Y5F1;A0A2R8YGU4;X5D2U8;H3BMQ0;A0A2R8YDZ2;A0A2R8Y7X5;A0A2R8YDR3;A0A2R8Y7C8;A0A2R8YGD6;P49815;H3BQK4;A0A2R8YHA2;A0A2R8Y670	A0A2R8Y6C9;A0A2R8Y5F1;A0A2R8YGU4;X5D2U8;H3BMQ0;A0A2R8YDZ2;A0A2R8Y7X5;A0A2R8YDR3;A0A2R8Y7C8;A0A2R8YGD6;P49815	149.4	20.6136	NaN	14	14	14	16.9	16.9	16.9	61.252	8	0	TSC2
INF2	Inverted formin-2	Inverted formin-2;Inverted formin-2 (Fragment)	Q27J81;A0A0A0MQU1	Q27J81;A0A0A0MQU1	135.62	20.6118	NaN	12	12	12	15.1	15.1	15.1	52.417	9	0	INF2
EXOC6B	Exocyst complex component 6B	Exocyst complex component;Exocyst complex component;Exocyst complex component 6B	J3QT38;A0A0U1RRB6;Q9Y2D4;F8W6R7	J3QT38;A0A0U1RRB6;Q9Y2D4	79.368	20.5918	NaN	8	7	7	19.4	17.8	17.8	20.098	5	0	EXOC6B
PANK4	Pantothenate kinase 4	Pantothenate kinase 4;Pantothenate kinase 4;Pantothenate kinase 4 (Fragment);Pantothenate kinase 4 (Fragment)	Q9NVE7;A0A0G2JR38;E9PHT6;H0YA26;H0Y9E4	Q9NVE7;A0A0G2JR38;E9PHT6;H0YA26	85.99	20.5819	NaN	9	9	9	16.4	16.4	16.4	45.176	5	0	PANK4
DCAF8	DDB1- and CUL4-associated factor 8	Uncharacterized protein;DDB1- and CUL4-associated factor 8;DDB1- and CUL4-associated factor 8	G3V3G9;Q5TAQ9;V9GY54;H0YDY4;Q5TAQ8	G3V3G9;Q5TAQ9;V9GY54	84.752	20.5766	NaN	7	7	5	10.9	10.9	8.3	62.939	5	0	DCAF8
LIMD1	LIM domain-containing protein 1	LIM domain-containing protein 1;LIM domain-containing protein 1	C9JRJ5;Q9UGP4	C9JRJ5;Q9UGP4	65.534	20.5679	NaN	7	7	7	24.2	24.2	24.2	41.887	5	0	LIMD1
SPTAN1	Spectrin alpha chain, non-erythrocytic 1	Spectrin alpha chain, non-erythrocytic 1;Spectrin alpha chain, non-erythrocytic 1;Spectrin alpha chain, non-erythrocytic 1	Q13813;A0A0D9SF54;A0A0D9SGF6;A0A1B0GTB7;A0A0D9SFH4;A0A0D9SFF6	Q13813;A0A0D9SF54;A0A0D9SGF6	284.54	20.5382	NaN	23	23	23	14.8	14.8	14.8	75.886	18	0	SPTAN1
MYO5A	Unconventional myosin-Va	Unconventional myosin-Va;Unconventional myosin-Va;Unconventional myosin-Va;Unconventional myosin-Va;Unconventional myosin-Va	A0A087WY00;F8WE88;F8W6H6;Q9Y4I1;G3V394;Q9UES5;O95317;E7ERV5;G3V3C9	A0A087WY00;F8WE88;F8W6H6;Q9Y4I1;G3V394	212.2	20.5349	NaN	19	16	15	13.7	11.8	11.4	29.567	12	0	MYO5A
TMEFF2	Tomoregulin-2	Tomoregulin-2	Q9UIK5	Q9UIK5	41.428	20.5195	24.1112	9	9	9	21.7	21.7	21.7	45.568	1	9	TMEFF2
MVB12B	Multivesicular body subunit 12B	Multivesicular body subunit 12B;Multivesicular body subunit 12B (Fragment)	Q9H7P6;F8W922	Q9H7P6;F8W922	35.619	20.4958	21.567	13	13	13	63.6	63.6	63.6	98.355	2	6	MVB12B
PELO	Protein pelota homolog	Protein pelota homolog	Q9BRX2	Q9BRX2	43.359	20.4775	NaN	8	8	8	21.6	21.6	21.6	22.305	4	0	PELO
ABCF3	ATP-binding cassette sub-family F member 3	ATP-binding cassette sub-family F member 3	Q9NUQ8;F8WCU6	Q9NUQ8	79.744	20.4732	NaN	12	12	12	25.1	25.1	25.1	43.815	4	0	ABCF3
DIAPH1	Protein diaphanous homolog 1	Protein diaphanous homolog 1;Protein diaphanous homolog 1;Protein diaphanous homolog 1;Protein diaphanous homolog 1	A0A140T8Z0;A0A0G2JH68;O60610;A0A2R8Y5N1;B4E2I7;H7C2W8	A0A140T8Z0;A0A0G2JH68;O60610;A0A2R8Y5N1	140.3	20.4659	NaN	11	11	3	12	12	2.5	43.308	8	0	DIAPH1
FAM135A	Protein FAM135A	Protein FAM135A;Protein FAM135A	Q9P2D6;D6RCC7	Q9P2D6;D6RCC7	169.84	20.4435	NaN	7	7	7	9.2	9.2	9.2	36.07	3	0	FAM135A
NFKB1	Nuclear factor NF-kappa-B p105 subunit;Nuclear factor NF-kappa-B p50 subunit	Nuclear factor NF-kappa-B p105 subunit;Nuclear factor NF-kappa-B p105 subunit (Fragment)	P19838;D6RH30;D6RF93;D6RC45	P19838;D6RH30	105.35	20.4425	NaN	9	9	9	13.7	13.7	13.7	17.37	6	0	NFKB1
STON1	Stonin-1	Stonin-1;Protein STON1-GTF2A1L;STON1-GTF2A1L readthrough	Q9Y6Q2;A0A0A6YYG5;Q53S48	Q9Y6Q2;A0A0A6YYG5;Q53S48	83.14	20.4338	NaN	10	10	10	20.1	20.1	20.1	21.171	5	0	STON1
SI	Sucrase-isomaltase, intestinal;Sucrase;Isomaltase	Sucrase-isomaltase, intestinal	P14410	P14410	209.45	20.4272	20.4332	48	48	47	28.5	28.5	27.8	144.45	3	3	SI
FAM120A	Constitutive coactivator of PPAR-gamma-like protein 1	Constitutive coactivator of PPAR-gamma-like protein 1	Q9NZB2;A0A0C4DH52;A0A0C4DG79	Q9NZB2	121.89	20.427	14.2356	8	8	8	10.1	10.1	10.1	45.968	5	0	FAM120A
CTSD	Cathepsin D;Cathepsin D light chain;Cathepsin D heavy chain	Cathepsin D;Cathepsin D;Cathepsin D;Cathepsin D;Uncharacterized protein;Uncharacterized protein;Cathepsin D;Uncharacterized protein (Fragment);Cathepsin D;Cathepsin D (Fragment);Cathepsin D;Cathepsin D (Fragment)	A0A1B0GW44;A0A1B0GV23;A0A1B0GVD5;A0A1B0GWE8;A0A1B0GU92;A0A1B0GU03;P07339;H7C469;A0A1B0GVP3;F8W787;F8WD96;C9JH19;H7C1V0;A0A1B0GVF1;A0A1B0GV01	A0A1B0GW44;A0A1B0GV23;A0A1B0GVD5;A0A1B0GWE8;A0A1B0GU92;A0A1B0GU03;P07339;H7C469;A0A1B0GVP3;F8W787;F8WD96;C9JH19	43.688	20.4169	18.2276	7	7	7	24.9	24.9	24.9	11.504	2	1	CTSD
KARS	Lysine--tRNA ligase	Lysine--tRNA ligase	Q15046;H3BVA8;J3KRL2;H3BRC9;H3BPV7	Q15046	68.047	20.4076	NaN	8	8	8	21.1	21.1	21.1	48.05	3	0	KARS
USP7	Ubiquitin carboxyl-terminal hydrolase 7;Ubiquitin carboxyl-terminal hydrolase	Ubiquitin carboxyl-terminal hydrolase 7;Ubiquitin carboxyl-terminal hydrolase 7 (Fragment)	Q93009;H3BND8;F5H2X1;I3L2D8;H3BMF6	Q93009;H3BND8	128.3	20.3773	NaN	7	7	7	9.1	9.1	9.1	27.194	4	0	USP7
MYO1D	Unconventional myosin-Id	Unconventional myosin-Id;Unconventional myosin-Id;Unconventional myosin-Id	K7EIG7;O94832;J3QRN6;J3KRL0	K7EIG7;O94832;J3QRN6	106.01	20.364	NaN	11	11	11	13.4	13.4	13.4	25.439	6	0	MYO1D
LSR	Lipolysis-stimulated lipoprotein receptor	Lipolysis-stimulated lipoprotein receptor;Lipolysis-stimulated lipoprotein receptor	S4R3V8;Q86X29;M0QZL9;M0R1W9	S4R3V8;Q86X29	66.175	20.347	21.1331	12	12	12	18	18	18	32.477	3	4	LSR
STAT6	Signal transducer and activator of transcription 6	Signal transducer and activator of transcription 6;Signal transducer and activator of transcription	P42226;A0A1W2PNW1;G3V5I8;G3V370;G3V2X7;H0YIY2;G3V5K5;H0YJH6;Q5FBW6;G3V2L2;G3V2M3;G3V3E9;G3V2H4;G3V568	P42226;A0A1W2PNW1	94.134	20.3468	NaN	9	9	9	15.5	15.5	15.5	26.952	2	0	STAT6
COBL	Protein cordon-bleu	Protein cordon-bleu (Fragment);Protein cordon-bleu;Protein cordon-bleu (Fragment)	H7C1N2;O75128;J3KR05;A0A0J9YWK3;A0A3B3IU00	H7C1N2;O75128;J3KR05	119.04	20.3459	NaN	9	9	9	12.9	12.9	12.9	17.86	8	0	COBL
MICALL1	MICAL-like protein 1	MICAL-like protein 1;MICAL-like protein 1 (Fragment)	Q8N3F8;H0Y6J8;B0QY91	Q8N3F8;H0Y6J8	93.44	20.2956	NaN	7	7	7	12.1	12.1	12.1	15.546	6	0	MICALL1
APOE	Apolipoprotein E	Apolipoprotein E;Apolipoprotein E (Fragment);Apolipoprotein E (Fragment);Apolipoprotein E (Fragment)	P02649;H0Y7L5;E9PEV4;E7ERP7;CON__Q03247	P02649;H0Y7L5;E9PEV4;E7ERP7	36.154	20.2904	20.9893	19	19	19	59.9	59.9	59.9	151.3	1	7	APOE
LARS	Leucine--tRNA ligase, cytoplasmic	Leucine--tRNA ligase, cytoplasmic	Q9P2J5;A0A087WXY1	Q9P2J5	134.46	20.289	NaN	18	18	18	23	23	23	36.007	10	0	LARS
PAEP	Glycodelin	Glycodelin (Fragment);Glycodelin (Fragment);Glycodelin (Fragment);Glycodelin;Glycodelin	H0Y4U4;H0Y6A4;Q5T6T6;A6XNE0;P09466;H0Y530;F2Z349	H0Y4U4;H0Y6A4;Q5T6T6;A6XNE0;P09466	14.952	20.2884	24.2754	10	10	10	56.5	56.5	56.5	39.604	0	8	PAEP
SEC31A	Protein transport protein Sec31A	Protein transport protein Sec31A;Protein transport protein Sec31A;Protein transport protein Sec31A;Protein transport protein Sec31A	D6REX3;O94979;H7BXG7;D6RHZ5;H0YAB3;H0Y8W8;H0Y8V7;D6RBT0;D6RHE8;D6RE64;D6RCQ9;H0YAF5;H0Y9V3;H0Y9T9;H0Y9K1	D6REX3;O94979;H7BXG7;D6RHZ5	136.22	20.275	NaN	14	14	14	14.7	14.7	14.7	31.988	6	0	SEC31A
PACS1	Phosphofurin acidic cluster sorting protein 1	Phosphofurin acidic cluster sorting protein 1;cDNA FLJ58767, highly similar to Phosphofurin acidic cluster sorting protein 1	Q6VY07;B4DF77;E9PSG7;E9PSE1;H0YF56;H0YE62;H0YCU5;E9PPK2	Q6VY07;B4DF77	104.9	20.2496	NaN	10	10	10	13.6	13.6	13.6	19.233	10	0	PACS1
THBS4	Thrombospondin-4	Thrombospondin-4;Thrombospondin-4	E7ES19;P35443;G3XAP6;CON__ENSEMBL:ENSBTAP00000006074;P49747	E7ES19;P35443	96.005	20.2479	20.8122	12	12	12	22.1	22.1	22.1	32.828	2	6	THBS4
FMOD	Fibromodulin	Fibromodulin;Fibromodulin	Q06828;A0A3B3IRN5	Q06828;A0A3B3IRN5	43.178	20.2262	21.4393	8	8	8	36.4	36.4	36.4	32.658	1	4	FMOD
SEPTIN9	Septin-9	Septin-9;Septin-9 (Fragment);Septin-9 (Fragment);Septin-9 (Fragment);Septin-9 (Fragment);Septin-9 (Fragment);Septin-9 (Fragment);Septin-9 (Fragment)	Q9UHD8;K7EK18;K7EL40;K7ER52;K7EIE4;K7EQD7;K7EJZ2;K7ELJ9;K7EIR4;K7EKN4;K7EN52;K7ENQ5;K7EJ51;K7ER14;K7ER34;K7ENL0	Q9UHD8;K7EK18;K7EL40;K7ER52;K7EIE4;K7EQD7;K7EJZ2;K7ELJ9	65.401	20.2124	NaN	10	10	10	23.4	23.4	23.4	24.859	8	0	SEPTIN9
LRRC40	Leucine-rich repeat-containing protein 40	Leucine-rich repeat-containing protein 40	Q9H9A6	Q9H9A6	68.249	20.2087	NaN	6	6	6	13	13	13	11.738	3	0	LRRC40
LFNG	Beta-1,3-N-acetylglucosaminyltransferase lunatic fringe	Beta-1,3-N-acetylglucosaminyltransferase lunatic fringe;Beta-1,3-N-acetylglucosaminyltransferase lunatic fringe	Q8NES3;A0A087X191	Q8NES3;A0A087X191	41.773	20.2078	20.5214	6	6	6	24.3	24.3	24.3	18.271	2	8	LFNG
ARMC6	Armadillo repeat-containing protein 6	Armadillo repeat-containing protein 6;cDNA FLJ50945, highly similar to Armadillo repeat-containing protein 6;Armadillo repeat-containing protein 6 (Fragment);Armadillo repeat-containing protein 6 (Fragment)	Q6NXE6;B4E1N1;F5GWV0;F5H4P3;F5H6J3;F5H052;F5H2X2;F5H2K4;H0YGL0;H0YGQ5;H0YH65	Q6NXE6;B4E1N1;F5GWV0;F5H4P3	54.141	20.1917	14.6029	9	9	9	28.9	28.9	28.9	20.106	5	0	ARMC6
TTC37	Tetratricopeptide repeat protein 37	Tetratricopeptide repeat protein 37;Tetratricopeptide repeat protein 37 (Fragment)	Q6PGP7;D6RCE2;D6RDA0;H0Y964	Q6PGP7;D6RCE2	175.48	20.1895	NaN	20	20	20	18.5	18.5	18.5	110.79	6	0	TTC37
OXR1	Oxidation resistance protein 1	Oxidation resistance protein 1;Oxidation resistance protein 1 (Fragment)	Q8N573;H0YC07	Q8N573;H0YC07	97.969	20.1893	NaN	7	7	7	10.4	10.4	10.4	19.663	7	0	OXR1
PLCB1	1-phosphatidylinositol 4,5-bisphosphate phosphodiesterase beta-1;Phosphoinositide phospholipase C	1-phosphatidylinositol 4,5-bisphosphate phosphodiesterase beta-1;1-phosphatidylinositol 4,5-bisphosphate phosphodiesterase;1-phosphatidylinositol 4,5-bisphosphate phosphodiesterase;1-phosphatidylinositol 4,5-bisphosphate phosphodiesterase;Phosphoinositide	Q9NQ66;A0A1B0GWB6;A0A087WW73;A0A087WT80;H0YCJ2;A0A0D9SF51;A0A0D9SG17;A0A0D9SGI7;A0A1B0GW62;A0A1B0GVC1;Q8IV92;B1AK73;A0A0D9SFE7;A0A1B0GTC7;Q8IV91	Q9NQ66;A0A1B0GWB6;A0A087WW73;A0A087WT80;H0YCJ2;A0A0D9SF51;A0A0D9SG17;A0A0D9SGI7	138.57	20.1802	NaN	12	12	12	12.4	12.4	12.4	24.253	4	0	PLCB1
SHROOM1	Protein Shroom1	Protein Shroom1;Protein Shroom1;Protein Shroom1 (Fragment)	Q2M3G4;A6NN40;C9JXU1	Q2M3G4;A6NN40;C9JXU1	90.785	20.1769	NaN	8	8	8	19.1	19.1	19.1	24.639	3	0	SHROOM1
PREPL	Prolyl endopeptidase-like	Prolyl endopeptidase-like	Q4J6C6;H7BZP6;H7C0M0;C9JMT4	Q4J6C6	83.926	20.164	NaN	7	7	7	16.8	16.8	16.8	20.634	6	0	PREPL
ARHGAP35	Rho GTPase-activating protein 35	Rho GTPase-activating protein 35	Q9NRY4	Q9NRY4	170.51	20.1587	NaN	11	11	11	13.1	13.1	13.1	34.455	4	0	ARHGAP35
APOA4	Apolipoprotein A-IV	Apolipoprotein A-IV	P06727	P06727	45.398	20.1418	24.1532	43	43	41	68.7	68.7	65.9	127.3	0	28	APOA4
IPO5	Importin-5	Importin-5;Importin-5 (Fragment)	O00410;H0Y8C6;E7EQT5;E7ETV3;C9JZD8;C9JZ53;E7EV12;C9JMV5;H0Y3V4	O00410;H0Y8C6	123.63	20.1265	NaN	9	9	9	12.3	12.3	12.3	77.244	9	0	IPO5
EIF3C	Eukaryotic translation initiation factor 3 subunit C;Eukaryotic translation initiation factor 3 subunit C-like protein	Eukaryotic translation initiation factor 3 subunit C;Eukaryotic translation initiation factor 3 subunit C-like protein	Q99613;B5ME19;H3BPE4	Q99613;B5ME19	105.34	20.1084	15.9817	12	12	12	15.7	15.7	15.7	20.379	7	0	EIF3C
FYCO1	FYVE and coiled-coil domain-containing protein 1	FYVE and coiled-coil domain-containing protein 1	Q9BQS8	Q9BQS8	166.98	20.1032	NaN	17	17	17	16.3	16.3	16.3	39.217	7	0	FYCO1
DENND4C	DENN domain-containing protein 4C	DENN domain-containing protein 4C;DENN domain-containing protein 4C (Fragment)	Q5VZ89;X6RAE7;X6R5W5;A0A0A0MRX3	Q5VZ89;X6RAE7	212.71	20.0574	14.6227	9	9	9	7	7	7	19.824	4	0	DENND4C
TSC1	Hamartin	Hamartin;Hamartin;Hamartin (Fragment);Hamartin;Hamartin	A0A2R8Y5S3;Q92574;A0A2R8Y6S1;A0A2R8YFV7;A0A2R8Y5N2;A0A2R8Y5U8;A0A2R8Y5M3;A0A2R8YGX7;A0A2R8YD74;Q86WV8;A0A2R8Y7E9;A0A2R8Y6W1;Q59IT9	A0A2R8Y5S3;Q92574;A0A2R8Y6S1;A0A2R8YFV7;A0A2R8Y5N2	129.69	20.0413	NaN	9	9	9	11.7	11.7	11.7	27.206	6	0	TSC1
AP3B1	AP-3 complex subunit beta-1	AP-3 complex subunit beta-1	O00203;H0YBD0;A0A2R8Y2A8;Q13367	O00203	121.32	20.0303	NaN	8	8	8	10.5	10.5	10.5	23.545	4	0	AP3B1
S100A8	Protein S100-A8;Protein S100-A8, N-terminally processed	Protein S100-A8	P05109	P05109	10.834	20.0281	NaN	8	8	8	51.6	51.6	51.6	23.219	1	0	S100A8
PFKM	ATP-dependent 6-phosphofructokinase, muscle type	ATP-dependent 6-phosphofructokinase;ATP-dependent 6-phosphofructokinase, muscle type;ATP-dependent 6-phosphofructokinase, muscle type	A0A2R8Y891;P08237;F8VZI0;F8VP00;F8W1J8;F8VSF7;F8VW30;F8VSL1;F8VUB8;F8VYK8;F8VTQ3;F8VX13;F8VNX2;F8VZQ1;F8VVE3	A0A2R8Y891;P08237;F8VZI0	96.907	20.0125	NaN	10	7	7	17.9	14.8	14.8	17.207	4	0	PFKM
PLAA	Phospholipase A-2-activating protein	Phospholipase A-2-activating protein;Phospholipase A-2-activating protein	Q9Y263;E5RIM3;H0YAU9;H0YC16;H0YBW4	Q9Y263;E5RIM3	87.156	20.0036	NaN	9	9	9	17.2	17.2	17.2	22.324	6	0	PLAA
LRBA	Lipopolysaccharide-responsive and beige-like anchor protein	Lipopolysaccharide-responsive and beige-like anchor protein;Lipopolysaccharide-responsive and beige-like anchor protein;Lipopolysaccharide-responsive and beige-like anchor protein (Fragment)	E9PEM5;P50851;H0YAC6;Q5T321;A0A0D9SF28;F5GXV7;Q8NFP9;H0Y9N9;A0A3B3IU76;A0A3B3IS13	E9PEM5;P50851;H0YAC6	286.97	19.9825	NaN	17	17	17	8.4	8.4	8.4	37.479	9	0	LRBA
VSTM2L	V-set and transmembrane domain-containing protein 2-like protein	V-set and transmembrane domain-containing protein 2-like protein	Q96N03	Q96N03	22.349	19.9812	22.0186	5	5	5	29.9	29.9	29.9	15.008	0	6	VSTM2L
FBLN2	Fibulin-2	Fibulin-2	P98095;H7C1A3;H7BXL0	P98095	126.57	19.9784	17.8341	10	10	10	14.9	14.9	14.9	48.756	3	2	FBLN2
SHROOM2	Protein Shroom2	Protein Shroom2	Q13796;C9IZC6;F5H3B6	Q13796	176.41	19.9464	NaN	14	14	14	12.1	12.1	12.1	23.983	12	0	SHROOM2
PLCB3	1-phosphatidylinositol 4,5-bisphosphate phosphodiesterase beta-3	1-phosphatidylinositol 4,5-bisphosphate phosphodiesterase beta-3	Q01970	Q01970	138.8	19.9392	NaN	9	9	9	12.4	12.4	12.4	21.208	6	0	PLCB3
HEXB	Beta-hexosaminidase subunit beta;Beta-hexosaminidase subunit beta chain B;Beta-hexosaminidase subunit beta chain A	Beta-hexosaminidase subunit beta;Beta-hexosaminidase subunit beta;Beta-hexosaminidase subunit beta (Fragment);Beta-hexosaminidase subunit beta (Fragment)	P07686;Q5URX0;H0YA83;H0Y9B6;D6REQ8;H0Y9M3	P07686;Q5URX0;H0YA83;H0Y9B6	63.111	19.937	19.7589	8	8	8	22.3	22.3	22.3	23.594	1	4	HEXB
HIST1H2AJ	Histone H2A type 1-J;Histone H2A type 1-H;Histone H2A.J;Histone H2A type 2-C;Histone H2A type 2-A;Histone H2A type 1;Histone H2A type 1-D;Histone H2A;Histone H2A type 1-A	Histone H2A type 1-J;Histone H2A type 1-H;Histone H2A.J;Histone H2A type 2-C;Histone H2A type 2-A;Histone H2A type 1;Histone H2A;Histone H2A;Histone H2A type 1-D;Histone H2A (Fragment);Histone H2A type 1-A	Q99878;Q96KK5;Q9BTM1;Q16777;Q6FI13;P0C0S8;A0A0U1RR32;A0A0U1RRH7;P20671;H0YFX9;Q96QV6;Q8IUE6;C9J0D1;Q71UI9;P0C0S5;C9J386	Q99878;Q96KK5;Q9BTM1;Q16777;Q6FI13;P0C0S8;A0A0U1RR32;A0A0U1RRH7;P20671;H0YFX9;Q96QV6	13.936	19.934	20.6105	8	8	2	46.1	46.1	14.1	17.399	0	3	HIST1H2AJ
FAM3B	Protein FAM3B	Protein FAM3B;Protein FAM3B	A8MTF8;P58499	A8MTF8;P58499	28.282	19.8729	21.0201	10	10	10	44.6	44.6	44.6	22.181	1	7	FAM3B
VPS13C	Vacuolar protein sorting-associated protein 13C	Vacuolar protein sorting-associated protein 13C	Q709C8;A0A3B3IU50;A0A3B3IT88	Q709C8	422.39	19.7767	NaN	25	25	25	9.8	9.8	9.8	63.031	13	0	VPS13C
BCAS3	Breast carcinoma-amplified sequence 3	Breast carcinoma-amplified sequence 3;Breast carcinoma-amplified sequence 3	Q9H6U6;K7ESE9;K7EJU7	Q9H6U6;K7ESE9	101.24	19.7445	NaN	10	10	10	15.1	15.1	15.1	21.701	5	0	BCAS3
CTSL	Cathepsin L1;Cathepsin L1 heavy chain;Cathepsin L1 light chain	Cathepsin L1;Cathepsin L1	P07711;Q5T8F0;O60911	P07711;Q5T8F0	37.564	19.7303	24.6791	12	12	12	32.4	32.4	32.4	71.732	0	12	CTSL
VARS	Valine--tRNA ligase	Valine--tRNA ligase;Valine--tRNA ligase (Fragment)	P26640;A0A140T936;A2ABF4;A0A0G2JJT9;A0A140T954;H0Y426	P26640;A0A140T936	140.47	19.7236	NaN	6	6	6	7.6	7.6	7.6	12.838	5	0	VARS
ARFGEF3	Brefeldin A-inhibited guanine nucleotide-exchange protein 3	Brefeldin A-inhibited guanine nucleotide-exchange protein 3	Q5TH69	Q5TH69	240.65	19.7142	NaN	19	19	19	12	12	12	48.229	5	0	ARFGEF3
LARP1	La-related protein 1	La-related protein 1;La-related protein 1 (Fragment);La-related protein 1 (Fragment)	Q6PKG0;A0A0B4J210;E5RH50;H0YC33;H0YBW1;H0YAN4;H0YC73	Q6PKG0;A0A0B4J210;E5RH50	123.51	19.7129	14.9168	9	9	9	13.3	13.3	13.3	20.85	10	0	LARP1
DIP2A	Disco-interacting protein 2 homolog A	Disco-interacting protein 2 homolog A	Q14689	Q14689	170.37	19.7045	NaN	8	8	6	8	8	7.2	17.088	4	0	DIP2A
USP47	Ubiquitin carboxyl-terminal hydrolase 47	Ubiquitin carboxyl-terminal hydrolase 47	Q96K76	Q96K76	157.31	19.6911	NaN	13	13	13	14.8	14.8	14.8	37.177	6	0	USP47
CC2D1A	Coiled-coil and C2 domain-containing protein 1A	Coiled-coil and C2 domain-containing protein 1A;Coiled-coil and C2 domain-containing protein 1A (Fragment)	Q6P1N0;K7EMP1;K7EJY5	Q6P1N0;K7EMP1	104.06	19.6747	NaN	8	8	8	11.9	11.9	11.9	14.186	3	0	CC2D1A
PROM2	Prominin-2	Prominin-2	Q8N271;F8WDW5	Q8N271	91.882	19.6541	20.8696	20	20	20	22.7	22.7	22.7	68.986	2	12	PROM2
PDE8B	High affinity cAMP-specific and IBMX-insensitive 3,5-cyclic phosphodiesterase 8B	High affinity cAMP-specific and IBMX-insensitive 3,5-cyclic phosphodiesterase 8B;Phosphodiesterase	O95263;A0A2R8Y4E6;D6RH10;D6RJD7;O60658	O95263;A0A2R8Y4E6	98.978	19.646	NaN	9	9	9	13.6	13.6	13.6	20.868	5	0	PDE8B
PTK7	Inactive tyrosine-protein kinase 7	Inactive tyrosine-protein kinase 7;Inactive tyrosine-protein kinase 7 (Fragment);Inactive tyrosine-protein kinase 7 (Fragment)	Q13308;C9JQR6;H0Y8F1;F8WCI7	Q13308;C9JQR6;H0Y8F1	118.39	19.6432	14.8839	6	6	6	8.9	8.9	8.9	11.558	5	0	PTK7
LAMC1	Laminin subunit gamma-1	Laminin subunit gamma-1	P11047;R4GNC7;Q9Y6N6	P11047	177.6	19.5776	24.4636	83	83	83	48.2	48.2	48.2	323.31	5	83	LAMC1
SPTBN1	Spectrin beta chain, non-erythrocytic 1	Spectrin beta chain, non-erythrocytic 1;Spectrin beta chain	Q01082;A0A087WUZ3;F8W6C1	Q01082;A0A087WUZ3	274.61	19.5713	NaN	15	15	15	9.3	9.3	9.3	35.496	6	0	SPTBN1
RNF31	E3 ubiquitin-protein ligase RNF31	E3 ubiquitin-protein ligase RNF31;Uncharacterized protein (Fragment);E3 ubiquitin-protein ligase RNF31 (Fragment);E3 ubiquitin-protein ligase RNF31 (Fragment)	Q96EP0;A0A0B4J293;H0YKX0;H0YMN0;H0YNT1;H0YKI4;H0YNJ0;H0YMG4;H0YM13;H0YM83	Q96EP0;A0A0B4J293;H0YKX0;H0YMN0	119.65	19.5453	NaN	8	8	8	11.5	11.5	11.5	29.593	3	0	RNF31
MYO5B	Unconventional myosin-Vb	Unconventional myosin-Vb	Q9ULV0;A0A0A0MR36;K7EPI3	Q9ULV0	213.67	19.5168	12.4854	13	10	10	9.2	7.6	7.6	23.509	7	0	MYO5B
SMPD1	Sphingomyelin phosphodiesterase	Sphingomyelin phosphodiesterase;Sphingomyelin phosphodiesterase (Fragment)	P17405;H0YEP5;G3V1E1;E9PQT3;E9PL59;E9PPK6	P17405;H0YEP5	69.935	19.5011	20.0089	8	8	8	20	20	20	19.213	1	5	SMPD1
SDF4	45 kDa calcium-binding protein	45 kDa calcium-binding protein;45 kDa calcium-binding protein (Fragment);45 kDa calcium-binding protein	Q9BRK5;H0Y3T6;G3V1E2	Q9BRK5;H0Y3T6;G3V1E2	41.806	19.475	24.1485	16	16	16	40.6	40.6	40.6	54.172	1	15	SDF4
KIAA0196	WASH complex subunit strumpellin	WASH complex subunit 5;WASH complex subunit 5	Q12768;E7EQI7;E5RFU6	Q12768;E7EQI7	134.28	19.474	NaN	9	9	9	11.7	11.7	11.7	19.036	2	0	KIAA0196
RAPH1	Ras-associated and pleckstrin homology domains-containing protein 1	Ras association (RalGDS/AF-6) and pleckstrin homology domains 1, isoform CRA_b;Ras-associated and pleckstrin homology domains-containing protein 1;Ras-associated and pleckstrin homology domains-containing protein 1	C9K0J5;Q70E73;C9J164;C9JLG4	C9K0J5;Q70E73;C9J164	141.18	19.4669	NaN	9	9	9	10.8	10.8	10.8	20.096	7	0	RAPH1
LAMA5	Laminin subunit alpha-5	Laminin subunit alpha-5	O15230;A0A087WYH7;A0A075B783;A0A0A0MSA0;Q16787	O15230	399.73	19.4607	23.1697	133	133	133	41.2	41.2	41.2	323.31	5	101	LAMA5
KIAA1033	WASH complex subunit 7	WASH complex subunit 4;WASH complex subunit 4	A0A087X256;Q2M389;F8W1W1;F8VNZ5;F8VYH7	A0A087X256;Q2M389	136.5	19.4357	NaN	9	9	9	10.7	10.7	10.7	34.641	3	0	KIAA1033
GLA	Alpha-galactosidase A	Alpha-galactosidase A;Alpha-galactosidase A	P06280;A0A3B3IUC4;A0A3B3IRU3;V9GYN5	P06280;A0A3B3IUC4	48.766	19.4181	20.7543	8	8	8	21	21	21	33.578	1	6	GLA
KIF3A	Kinesin-like protein;Kinesin-like protein KIF3A	Kinesin-like protein;Kinesin-like protein;Kinesin-like protein;Kinesin-like protein KIF3A	J3KPF9;A0A087X011;E9PES4;Q9Y496;C9J9X2;H7C2F6	J3KPF9;A0A087X011;E9PES4;Q9Y496	80.354	19.4007	NaN	8	8	7	14.8	14.8	13	13.152	5	0	KIF3A
ARFGEF2	Brefeldin A-inhibited guanine nucleotide-exchange protein 2	Brefeldin A-inhibited guanine nucleotide-exchange protein 2	Q9Y6D5	Q9Y6D5	202.04	19.3771	13.358	14	14	11	11.6	11.6	10	34.129	8	0	ARFGEF2
AMOTL1	Angiomotin-like protein 1	Angiomotin-like protein 1	Q8IY63;A6NP16;E7ERM3;Q4VCS5	Q8IY63	106.57	19.3622	NaN	8	8	8	10.8	10.8	10.8	15.848	4	0	AMOTL1
ANKS1A	Ankyrin repeat and SAM domain-containing protein 1A	Ankyrin repeat and SAM domain-containing protein 1A;Ankyrin repeat and SAM domain-containing protein 1A	A0A3B3ISP1;Q92625;A0A3B3ITU5	A0A3B3ISP1;Q92625	129.9	19.3609	NaN	6	6	6	8.3	8.3	8.3	19.459	6	0	ANKS1A
UXS1	UDP-glucuronic acid decarboxylase 1	UDP-glucuronic acid decarboxylase 1;UDP-glucuronic acid decarboxylase 1 (Fragment);UDP-glucuronic acid decarboxylase 1 (Fragment);UDP-glucuronic acid decarboxylase 1 (Fragment);UDP-glucuronic acid decarboxylase 1 (Fragment)	Q8NBZ7;C9JCB7;C9JFU6;C9JE50;C9JW33;C9J3T9	Q8NBZ7;C9JCB7;C9JFU6;C9JE50;C9JW33	47.576	19.3261	22.4856	8	8	8	34.3	34.3	34.3	49.999	0	5	UXS1
MGAM	Maltase-glucoamylase, intestinal;Maltase;Glucoamylase	Maltase-glucoamylase, intestinal;Maltase-glucoamylase, intestinal;Maltase-glucoamylase, intestinal (Fragment);Maltase-glucoamylase, intestinal (Fragment)	E7ER45;O43451;A0A0J9YVZ3;A0A0J9YX77;E7EW87;E9PEQ5	E7ER45;O43451;A0A0J9YVZ3;A0A0J9YX77	312.02	19.2907	16.9215	26	25	23	19.4	18.1	16.9	62.793	3	3	MGAM
ATRN	Attractin	Attractin	O75882	O75882	158.54	19.2864	17.0899	17	17	17	15.7	15.7	15.7	46.843	3	0	ATRN
TMEM59	Transmembrane protein 59	Transmembrane protein 59;Transmembrane protein 59, isoform CRA_a	Q9BXS4;Q5T6Z8;Q5T706;Q5T704;Q5T703	Q9BXS4;Q5T6Z8	36.223	19.236	21.4754	5	5	5	19.5	19.5	19.5	22.105	1	2	TMEM59
THSD4	Thrombospondin type-1 domain-containing protein 4	Thrombospondin type-1 domain-containing protein 4	Q6ZMP0	Q6ZMP0	112.45	19.205	19.0403	6	6	6	9.1	9.1	9.1	12.307	2	3	THSD4
KIAA1324	UPF0577 protein KIAA1324	UPF0577 protein KIAA1324;UPF0577 protein KIAA1324 (Fragment)	Q6UXG2;E9PB18;E9PMS2;E9PS21;E9PLY8;E9PLQ2	Q6UXG2;E9PB18	111.38	19.1986	18.7934	8	8	8	13.6	13.6	13.6	44.327	4	2	KIAA1324
CACNA2D2	Voltage-dependent calcium channel subunit alpha-2/delta-2;Voltage-dependent calcium channel subunit alpha-2-2;Voltage-dependent calcium channel subunit delta-2	Voltage-dependent calcium channel subunit alpha-2/delta-2;Voltage-dependent calcium channel subunit alpha-2/delta-2;Voltage-dependent calcium channel subunit alpha-2/delta-2	C9JE82;Q9NY47;C9JVC9	C9JE82;Q9NY47;C9JVC9	129.21	19.1246	17.4236	8	8	8	11	11	11	23.798	2	1	CACNA2D2
APOA1	Apolipoprotein A-I;Proapolipoprotein A-I;Truncated apolipoprotein A-I	Apolipoprotein A-I;Apolipoprotein A-I	P02647;F8W696	P02647;F8W696	30.777	19.0993	22.8135	13	13	13	55.8	55.8	55.8	38.053	0	11	APOA1
DSP	Desmoplakin	Desmoplakin	P15924	P15924	331.77	19.0308	12.1904	22	22	22	10.7	10.7	10.7	47.104	12	0	DSP
CLASP2	CLIP-associating protein 2	CLIP-associating protein 2;CLIP-associating protein 2;CLIP-associating protein 2;CLIP-associating protein 2;CLIP-associating protein 2;CLIP-associating protein 2	E3W994;J3KR49;E7ERI8;E7EW49;O75122;A0A0U1RQI6;H7C4M5;H7C4X8;H7C5M8;B3KR06;E7ENG2	E3W994;J3KR49;E7ERI8;E7EW49;O75122;A0A0U1RQI6	138.86	18.9412	NaN	10	10	9	10.6	10.6	9.1	60.895	6	0	CLASP2
SBSPON	Somatomedin-B and thrombospondin type-1 domain-containing protein	Somatomedin-B and thrombospondin type-1 domain-containing protein	Q8IVN8	Q8IVN8	29.61	18.892	23.8188	11	11	11	50	50	50	49.743	0	12	SBSPON
CHID1	Chitinase domain-containing protein 1	Chitinase domain-containing protein 1;Chitinase domain-containing protein 1 (Fragment);Chitinase domain-containing protein 1 (Fragment);Chitinase domain-containing protein 1 (Fragment);Chitinase domain-containing protein 1;Chitinase domain-containing prote	Q9BWS9;E9PI70;E9PIP0;E9PRL3;E9PPH0;E9PPA0;H0YCC4;E9PKF1;H0YC89;H0YDL6	Q9BWS9;E9PI70;E9PIP0;E9PRL3;E9PPH0;E9PPA0	44.94	18.7881	21.8033	7	7	7	20.4	20.4	20.4	13.877	1	5	CHID1
USP9X	Probable ubiquitin carboxyl-terminal hydrolase FAF-X	Probable ubiquitin carboxyl-terminal hydrolase FAF-X	Q93008;O00507	Q93008	292.28	18.6942	NaN	10	10	10	5.1	5.1	5.1	42.031	10	0	USP9X
CRISP1	Cysteine-rich secretory protein 1	Cysteine-rich secretory protein 1	P54107	P54107	28.481	18.6878	24.8395	9	9	9	31.3	31.3	31.3	67.692	0	7	CRISP1
SEMA3D	Semaphorin-3D	Semaphorin-3D	O95025;C9JYT6	O95025	89.65	18.6642	17.1611	11	10	10	14.8	13.1	13.1	16.017	2	2	SEMA3D
HSPA13	Heat shock 70 kDa protein 13	Heat shock 70 kDa protein 13	P48723	P48723	51.927	18.5566	21.3816	9	9	9	19.3	19.3	19.3	30.784	0	7	HSPA13
GOLGA3	Golgin subfamily A member 3	Golgin subfamily A member 3	Q08378	Q08378	167.35	18.5175	NaN	8	8	8	8.1	8.1	8.1	19.91	6	0	GOLGA3
GLB1	Beta-galactosidase	Beta-galactosidase;Beta-galactosidase	P16278;E7EQ29;F8WF40;C9JF15;C9J539;C9JWX1;C9J4G9	P16278;E7EQ29	76.074	18.4476	18.7506	8	8	8	15.8	15.8	15.8	17.034	0	3	GLB1
APP	Amyloid beta A4 protein;N-APP;Soluble APP-alpha;Soluble APP-beta;C99;Beta-amyloid protein 42;Beta-amyloid protein 40;C83;P3(42);P3(40);C80;Gamma-secretase C-terminal fragment 59;Gamma-secretase C-terminal fragment 57;Gamma-secretase C-terminal fragment 50;C31	Amyloid-beta A4 protein (Fragment);Amyloid-beta A4 protein;Amyloid-beta A4 protein;Amyloid-beta A4 protein	H7C0V9;E9PG40;P05067;A0A0A0MRG2;H7C2L2	H7C0V9;E9PG40;P05067;A0A0A0MRG2	54.981	18.4443	21.7942	10	10	10	27.8	27.8	27.8	35.467	0	10	APP
UBR4	E3 ubiquitin-protein ligase UBR4	E3 ubiquitin-protein ligase UBR4;E3 ubiquitin-protein ligase UBR4 (Fragment)	Q5T4S7;A0A0A0MSW0;X6R960;X6RE05	Q5T4S7;A0A0A0MSW0	573.83	18.4421	NaN	18	18	18	6	6	6	74.341	6	0	UBR4
PLEC	Plectin	Plectin;Plectin	Q15149;H0YDN1	Q15149;H0YDN1	531.78	18.4013	NaN	18	18	18	6	6	6	48.296	9	0	PLEC
GCN1L1	Translational activator GCN1	eIF-2-alpha kinase activator GCN1	Q92616	Q92616	292.75	18.3686	12.0851	17	17	17	10.3	10.3	10.3	74.361	2	0	GCN1L1
SEMA3F	Semaphorin-3F	Semaphorin-3F;Semaphorin-3F;Semaphorin-3F (Fragment)	Q13275;C9JPG5;C9J4H5;C9J1V2;C9IYS6;H7C4A2	Q13275;C9JPG5;C9J4H5	88.38	18.273	19.3153	12	12	11	19.6	19.6	18	36.075	0	8	SEMA3F
LIPG	Endothelial lipase	Endothelial lipase;Endothelial lipase;Endothelial lipase	Q9Y5X9;J3QQQ0;B4DTR8;A0A075B751	Q9Y5X9;J3QQQ0;B4DTR8	56.794	18.0623	23.2477	10	10	10	22	22	22	46.956	0	13	LIPG
HYOU1	Hypoxia up-regulated protein 1	Hypoxia up-regulated protein 1 (Fragment);Hypoxia up-regulated protein 1;Hypoxia up-regulated protein 1;Hypoxia up-regulated protein 1;Hypoxia up-regulated protein 1	E9PJ21;A0A087WWI4;K7EQK2;A0A087X054;Q9Y4L1;J3KTF1;J3QL06;A0A087WW13;Q9BST8;J3QQH7;J3QLE9;A0A087X214	E9PJ21;A0A087WWI4;K7EQK2;A0A087X054;Q9Y4L1	72.976	18.0489	20.5888	16	16	16	31.7	31.7	31.7	43.309	0	6	HYOU1
VWA1	von Willebrand factor A domain-containing protein 1	von Willebrand factor A domain-containing protein 1;von Willebrand factor A domain-containing protein 1 (Fragment)	Q6PCB0;J3QLP3;J3QRR0	Q6PCB0;J3QLP3	46.804	17.9957	22.2855	11	11	11	35.1	35.1	35.1	41.831	0	8	VWA1
MAP4	Microtubule-associated protein;Microtubule-associated protein 4	Microtubule-associated protein;Microtubule-associated protein 4;Microtubule-associated protein (Fragment);Microtubule-associated protein 4 (Fragment);Microtubule-associated protein (Fragment);Microtubule-associated protein	E7EVA0;P27816;H7C4C5;B5MEG9;H0Y2V1;F8W9U4;H7C456	E7EVA0;P27816;H7C4C5;B5MEG9;H0Y2V1;F8W9U4	245.44	17.7812	NaN	6	6	6	4.1	4.1	4.1	13.479	7	0	MAP4
SLC44A2	Choline transporter-like protein 2	Choline transporter-like protein 2;Choline transporter-like protein 2 (Fragment);Choline transporter-like protein 2 (Fragment)	Q8IWA5;K7EPV6;K7ESF5	Q8IWA5;K7EPV6;K7ESF5	80.123	17.7633	17.9972	7	7	7	12	12	12	17.133	2	3	SLC44A2
TGFBR3	Transforming growth factor beta receptor type 3	Transforming growth factor beta receptor type 3	Q03167;E9PKY4	Q03167	93.498	17.469	19.6993	12	12	12	18.3	18.3	18.3	47.254	2	4	TGFBR3
MMP2	72 kDa type IV collagenase;PEX	72 kDa type IV collagenase;72 kDa type IV collagenase (Fragment);72 kDa type IV collagenase (Fragment)	P08253;H3BR66;H3BV48;J3KRB7	P08253;H3BR66;H3BV48	73.881	17.3151	22.1296	12	12	12	21.7	21.7	21.7	58.159	0	8	MMP2
TXNDC16	Thioredoxin domain-containing protein 16	Thioredoxin domain-containing protein 16	Q9P2K2	Q9P2K2	93.571	16.9481	19.2496	10	10	10	16.5	16.5	16.5	26.102	0	3	TXNDC16
RARRES1	Retinoic acid receptor responder protein 1	Retinoic acid receptor responder protein 1	P49788	P49788	33.285	16.5197	21.0775	7	7	7	17.7	17.7	17.7	12.394	0	6	RARRES1
ADAMTS1	A disintegrin and metalloproteinase with thrombospondin motifs 1	A disintegrin and metalloproteinase with thrombospondin motifs 1	Q9UHI8;E5RJR7;E5RI60;H7C206	Q9UHI8	105.36	16.2539	NaN	6	6	6	8.5	8.5	8.5	16.826	1	0	ADAMTS1
PRCP	Lysosomal Pro-X carboxypeptidase	Lysosomal Pro-X carboxypeptidase	P42785;E9PQB5;E9PL85;E9PQN3;E9PKN6;E9PIG4	P42785	55.799	16.0892	19.7874	3	3	3	5	5	5	11.593	1	3	PRCP
DNAJC3	DnaJ homolog subfamily C member 3	DnaJ homolog subfamily C member 3;DnaJ homolog subfamily C member 3	Q13217;X6R9L0	Q13217;X6R9L0	57.579	16.0189	22.9137	25	25	25	57.9	57.9	57.9	90.323	0	24	DNAJC3
FCGBP	IgGFc-binding protein	IgGFc-binding protein;IgGFc-binding protein (Fragment)	Q9Y6R7;A0A087WXI2;A0A087WUZ2;A0A286YF91	Q9Y6R7;A0A087WXI2	572.01	15.9796	19.3173	22	22	22	11.7	11.7	11.7	76.268	1	14	FCGBP
NRP1	Neuropilin-1	Neuropilin;Neuropilin-1;Neuropilin-1;Neuropilin;Neuropilin-1;Neuropilin	E9PEP6;O14786;E7EX60;Q5T7F0;Q5JWQ4;Q5JWQ6;H0Y4A0	E9PEP6;O14786;E7EX60;Q5T7F0;Q5JWQ4;Q5JWQ6	101.3	15.7161	17.3691	10	10	10	18.4	18.4	18.4	21.307	0	1	NRP1
MATN2	Matrilin-2	Matrilin-2;Matrilin-2 (Fragment)	O00339;H0YBJ4;H0YBU5;H0YBF2;H0YBN2;H0YBD5	O00339;H0YBJ4	106.84	15.3645	21.0672	16	16	16	24.8	24.8	24.8	57.372	0	9	MATN2
MUC5B	Mucin-5B	Mucin-5B	Q9HC84;P98088	Q9HC84	596.33	14.9523	23.1474	50	50	50	14.4	14.4	14.4	234.78	1	54	MUC5B
MXRA5	Matrix-remodeling-associated protein 5	Matrix-remodeling-associated protein 5	Q9NR99	Q9NR99	312.15	14.7508	18.9511	20	20	20	10.3	10.3	10.3	55.776	1	15	MXRA5
MUC6	Mucin-6	Mucin-6;Mucin-6	A0A0G2JN42;Q6W4X9;E9PJC5	A0A0G2JN42;Q6W4X9	257.03	14.4941	25.844	49	49	2	21.8	21.8	1.2	323.31	0	86	MUC6
COL18A1	Collagen alpha-1(XVIII) chain;Endostatin	Collagen alpha-1(XVIII) chain;Collagen alpha-1(XVIII) chain (Fragment);Collagen alpha-1(XVIII) chain (Fragment)	P39060;H7BXV5;H7C457	P39060;H7BXV5;H7C457	178.19	14.4876	19.6381	12	12	12	9.4	9.4	9.4	103.46	0	5	COL18A1

## Sheet: exp-1-SEV total
T: Gene names	T: Protein names	T: Fasta headers	T: Protein IDs	T: Majority protein IDs	N: Mol. weight [kDa]	iBAQ EXP-1-LEV	iBAQ EXP-1-SEV	N: Peptides	N: Razor + unique peptides	N: Unique peptides	N: Sequence coverage [%]	N: Unique + razor sequence coverage [%]	N: Unique sequence coverage [%]	N: Score	N: MS/MS count exp1 LEV	N: MS/MS count exp1 SEV	T: Gene names
SEMG1	Semenogelin-1;Alpha-inhibin-92;Alpha-inhibin-31;Seminal basic protein	Semenogelin-1	P04279	P04279	52.13	28.7968	31.9246	108	103	103	94.6	94.6	94.6	323.31	174	370	SEMG1
SEMG2	Semenogelin-2	Semenogelin-2	Q02383	Q02383	65.444	29.4829	31.4309	123	123	118	95.7	95.7	95.7	323.31	222	428	SEMG2
CLU	Clusterin;Clusterin beta chain;Clusterin alpha chain	Clusterin	P10909;H0YC35;H0YLK8;H0YAS8;E7ETB4;E5RJZ5;E5RGB0;E5RH61;E5RG36;CON__P17697	P10909	52.494	27.582	29.6626	53	53	33	57.9	57.9	39.2	323.31	46	101	CLU
PIP	Prolactin-inducible protein	Prolactin-inducible protein	P12273	P12273	16.572	26.7729	29.4966	19	19	19	77.4	77.4	77.4	207	20	81	PIP
ACPP	Prostatic acid phosphatase;PAPf39	Prostatic acid phosphatase	P15309;H0Y8T3	P15309	44.566	31.0247	29.1108	33	33	22	53.4	53.4	44.3	323.31	76	68	ACPP
KLK3	Prostate-specific antigen	Prostate-specific antigen;Prostate-specific antigen (Fragment);Prostate-specific antigen;Prostate-specific antigen (Fragment);Kallikrein 3, (Prostate specific antigen), isoform CRA_d;Prostate-specific antigen (Fragment)	P07288;M0R1F0;Q8NCW4;M0QZF9;M0R294;M0R1Z7;M0QX57;A0A0B4J1X3	P07288;M0R1F0;Q8NCW4;M0QZF9;M0R294;M0R1Z7	28.741	31.1412	28.8013	26	26	25	88.9	88.9	88.9	323.31	69	54	KLK3
CD9	Tetraspanin;CD9 antigen	Tetraspanin;Tetraspanin;Tetraspanin;CD9 antigen	A6NNI4;A0A2R8Y478;G8JLH6;P21926;A0A087WU13	A6NNI4;A0A2R8Y478;G8JLH6;P21926	17.764	28.3922	28.6262	11	11	11	44.7	44.7	44.7	93.291	11	12	CD9
GLIPR2	Golgi-associated plant pathogenesis-related protein 1	Golgi-associated plant pathogenesis-related protein 1;Golgi-associated plant pathogenesis-related protein 1	Q9H4G4;Q5VZR0;A0A088AWP7;A0A087WUM5	Q9H4G4;Q5VZR0	17.218	29.3767	28.0151	25	25	25	98.1	98.1	98.1	242.17	55	25	GLIPR2
MME	Neprilysin	Neprilysin	P08473;C9JR96;C9J9X7;C9IYX7;C9JDZ3;A0A087WWM7;Q3KQS6	P08473	85.513	29.5023	27.9149	97	97	97	70.9	70.9	70.9	323.31	154	98	MME
LGALS3BP	Galectin-3-binding protein	Galectin-3-binding protein;Galectin-3-binding protein (Fragment)	Q08380;K7EP36;K7ESM3;K7EKQ5;K7ERZ6;K7EJD3;K7ES75;K7EN99;K7EJY8;K7EQT9	Q08380;K7EP36	65.33	23.2689	27.5442	28	28	28	42.6	42.6	42.6	196.95	7	44	LGALS3BP
PGC	Gastricsin	Gastricsin;Gastricsin (Fragment);Gastricsin (Fragment)	P20142;A2A3L9;Q4VXA6	P20142;A2A3L9;Q4VXA6	42.425	26.0579	27.4587	10	10	10	12.1	12.1	12.1	23.971	5	11	PGC
KLK2	Kallikrein-2	Kallikrein-2	P20151;A0A075B7A6;M0R1T3;M0QXQ7;M0R0M4;M0R0M2	P20151	28.671	28.1601	27.4006	13	12	12	64.8	61.3	61.3	139.41	18	17	KLK2
GGT1	Gamma-glutamyltranspeptidase 1;Gamma-glutamyltranspeptidase 1 heavy chain;Gamma-glutamyltranspeptidase 1 light chain;Putative gamma-glutamyltranspeptidase 3;Putative gamma-glutamyltranspeptidase 3 heavy chain;Putative gamma-glutamyltranspeptidase 3 light chain	Glutathione hydrolase 1 proenzyme;Glutathione hydrolase 1 proenzyme (Fragment);Putative glutathione hydrolase 3 proenzyme;Inactive glutathione hydrolase 2	P19440;E7ET76;A6NGU5;B5MCK8;P36268;E7ETR7;E7EVF8;E7ENJ5;E7EM62;E7ETJ6;E7ESL5;E7ETU4;E9PHP2;E7ERN9;E7ETN1;Q9BX51	P19440;E7ET76;A6NGU5;B5MCK8	61.409	26.6148	27.2239	36	36	29	39.5	39.5	27.1	147.01	25	43	GGT1
TMPRSS2	Transmembrane protease serine 2;Transmembrane protease serine 2 non-catalytic chain;Transmembrane protease serine 2 catalytic chain	Transmembrane protease serine 2 (Fragment);Transmembrane protease serine 2	C9JKZ3;O15393;C9J5Y1;C9JB05	C9JKZ3;O15393	53.615	27.0299	27.0921	34	34	34	55.8	55.8	55.8	289.06	26	37	TMPRSS2
LPL	Lipoprotein lipase	Lipoprotein lipase	P06858;E5RJI0;E5RHN7	P06858	53.162	23.375	26.9115	36	36	27	57.3	57.3	40.2	226.74	10	42	LPL
SDCBP	Syntenin-1	Syntenin-1;cDNA FLJ55055, moderately similar to Syntenin-1;Syntenin-1	O00560;B4DHN5;E9PBU7	O00560;B4DHN5;E9PBU7	32.444	25.4132	26.5374	32	32	5	87.9	87.9	17.1	195.45	24	24	SDCBP
CKB	Creatine kinase B-type	Creatine kinase B-type	P12277;G3V4N7;H0YJG0;H0YJK0;G3V2I1	P12277	42.644	31.3554	26.2189	53	53	41	87.1	87.1	68	323.31	189	54	CKB
CD59	CD59 glycoprotein	Uncharacterized protein;CD59 glycoprotein (Fragment);Uncharacterized protein;CD59 glycoprotein	E9PNW4;A0A2U3TZL5;E9PR17;P13987;H0YET2	E9PNW4;A0A2U3TZL5;E9PR17;P13987	11.985	29.19	26.1974	9	9	9	33.3	33.3	33.3	47.172	17	12	CD59
VPS28	Vacuolar protein sorting-associated protein 28 homolog	Vacuolar protein sorting-associated protein 28 homolog;Vacuolar protein sorting-associated protein 28 homolog (Fragment);Vacuolar protein sorting-associated protein 28 homolog (Fragment)	Q9UK41;E9PQR7;E9PM90;E9PR04;E9PLM9	Q9UK41;E9PQR7;E9PM90	25.425	26.0367	26.1509	21	21	21	64.7	64.7	64.7	163.78	17	26	VPS28
SPINK2	Serine protease inhibitor Kazal-type 2	Serine protease inhibitor Kazal-type 2;Serine protease inhibitor Kazal-type 2;Serine protease inhibitor Kazal-type 2	D6RC51;D6RI10;P20155	D6RC51;D6RI10;P20155	12.455	25.6082	26.1501	10	10	10	81.5	81.5	81.5	65.152	5	11	SPINK2
PPIA	Peptidyl-prolyl cis-trans isomerase A;Peptidyl-prolyl cis-trans isomerase A, N-terminally processed;Peptidyl-prolyl cis-trans isomerase	Peptidyl-prolyl cis-trans isomerase A;Peptidyl-prolyl cis-trans isomerase;Peptidyl-prolyl cis-trans isomerase	P62937;F8WE65;C9J5S7;P0DN26;A0A0H2UH34;A0A0B4J2A2;A0A075B767;A0A075B759;Q9Y536;F5H284;P0DN37;E5RIZ5	P62937;F8WE65;C9J5S7	18.012	31.0045	26.0261	24	24	24	95.2	95.2	95.2	138.02	59	23	PPIA
MUC6	Mucin-6	Mucin-6;Mucin-6	A0A0G2JN42;Q6W4X9;E9PJC5	A0A0G2JN42;Q6W4X9	257.03	14.4941	25.844	49	49	2	21.8	21.8	1.2	323.31	0	86	MUC6
AGRN	Agrin;Agrin N-terminal 110 kDa subunit;Agrin C-terminal 110 kDa subunit;Agrin C-terminal 90 kDa fragment;Agrin C-terminal 22 kDa fragment	Agrin;Agrin	O00468;A0A087X208;H0Y5U1	O00468;A0A087X208	217.32	21.4752	25.7836	72	72	72	40.3	40.3	40.3	323.31	16	79	AGRN
FN1	Fibronectin;Anastellin;Ugl-Y1;Ugl-Y2;Ugl-Y3	Fibronectin	P02751;H0Y7Z1;H0Y4K8	P02751	262.62	21.8087	25.7286	81	81	81	35.8	35.8	35.8	323.31	14	101	FN1
ANPEP	Aminopeptidase N	Aminopeptidase N	P15144;H0YKT6;H0YLZ8;H0YMC1;H0YM04	P15144	109.54	28.3362	25.6701	84	84	84	57.5	57.5	57.5	323.31	105	53	ANPEP
PSCA	Prostate stem cell antigen	Prostate stem cell antigen	O43653	O43653	11.959	28.6213	25.608	6	6	6	26.3	26.3	26.3	121.72	5	5	PSCA
RPS27A	Ubiquitin-40S ribosomal protein S27a;Ubiquitin;40S ribosomal protein S27a;Polyubiquitin-B;Ubiquitin;Polyubiquitin-C;Ubiquitin	Ubiquitin-40S ribosomal protein S27a;Polyubiquitin-B (Fragment);Ubiquitin-40S ribosomal protein S27a (Fragment);Polyubiquitin-C (Fragment);Polyubiquitin-C (Fragment);Polyubiquitin-C (Fragment);Polyubiquitin-C (Fragment);Polyubiquitin-B;Polyubiquitin-C (Fra	P62979;J3QS39;J3QTR3;F5H6Q2;F5GYU3;F5H2Z3;F5H265;B4DV12;F5H388;F5H747;F5GXK7;J3QKN0;Q5PY61;Q96C32;P0CG47;P0CG48;M0R1V7;Q49A90;A0A2R8Y422;F5GZ39;J3QSA3	P62979;J3QS39;J3QTR3;F5H6Q2;F5GYU3;F5H2Z3;F5H265;B4DV12;F5H388;F5H747;F5GXK7;J3QKN0;Q5PY61;Q96C32;P0CG47;P0CG48;M0R1V7;Q49A90;A0A2R8Y422	17.965	29.3142	25.5873	17	17	3	68.6	68.6	22.4	323.31	44	12	RPS27A
EEF1A1	Elongation factor 1-alpha 1;Putative elongation factor 1-alpha-like 3;Elongation factor 1-alpha	Elongation factor 1-alpha 1;Putative elongation factor 1-alpha-like 3;Elongation factor 1-alpha 1;Elongation factor 1-alpha	P68104;Q5VTE0;A0A087WVQ9;A0A087WV01;A6PW80;Q5JR01	P68104;Q5VTE0;A0A087WVQ9;A0A087WV01	50.14	29.3332	25.4905	35	35	22	72.3	72.3	51.9	306.51	89	25	EEF1A1
FOLH1	Glutamate carboxypeptidase 2	Glutamate carboxypeptidase 2	Q04609;Q9HBA9;E9PMK6;E9PKM3;E9PKX5;J3KNJ3;Q9Y3Q0;E9PI29;E9PLV0;E9PJV2	Q04609	84.33	27.2443	25.4133	54	54	54	54.9	54.9	54.9	323.31	68	44	FOLH1
PLA2G2A	Phospholipase A2, membrane associated	Phospholipase A2, membrane-associated;Phospholipase A2, membrane associated	A0A3B3IRX2;P14555	A0A3B3IRX2;P14555	13.037	30.1147	25.3248	27	27	27	90.6	90.6	90.6	323.31	49	11	PLA2G2A
CD177	CD177 antigen	CD177 antigen;CD177 antigen	Q8N6Q3;A0A087WVM2;A0A087X113	Q8N6Q3;A0A087WVM2	46.363	28.8575	25.2575	19	19	19	41.9	41.9	41.9	168.82	25	18	CD177
VPS37C	Vacuolar protein sorting-associated protein 37C	Vacuolar protein sorting-associated protein 37C;Vacuolar protein sorting-associated protein 37C (Fragment)	A5D8V6;F5H4Q5	A5D8V6;F5H4Q5	38.658	24.848	25.2252	12	12	12	32.1	32.1	32.1	35.05	9	8	VPS37C
ACTG1	Actin, cytoplasmic 2;Actin, cytoplasmic 2, N-terminally processed	Actin, cytoplasmic 2;Actin, cytoplasmic 2 (Fragment);Actin, cytoplasmic 2 (Fragment)	P63261;I3L3I0;I3L1U9;I3L4N8;I3L3R2;J3KT65;K7EM38	P63261;I3L3I0;I3L1U9	41.792	30.1242	25.1701	50	50	2	93.3	93.3	7.2	323.31	137	36	ACTG1
MSMB	Beta-microseminoprotein	Beta-microseminoprotein	P08118	P08118	12.865	31.2352	25.087	6	6	6	24.6	24.6	24.6	19.221	9	1	MSMB
GSTP1	Glutathione S-transferase P	Glutathione S-transferase P;Glutathione S-transferase P	P09211;A8MX94;A0A087X2E9;A0A2R8Y5E5;A0A087X243	P09211;A8MX94	23.356	29.516	25.0689	16	16	16	62.4	62.4	62.4	323.31	42	17	GSTP1
NUCB2	Nucleobindin-2;Nesfatin-1	Nucleobindin-2;Nucleobindin 2, isoform CRA_b;Nucleobindin-2;Nucb2 splice variant;Nucleobindin-2 (Fragment);Nucleobindin-2 (Fragment);Nucleobindin-2	P80303;A0A087WSV8;E9PKG6;Q2L696;E9PLR0;E9PLE9;A0A2R8Y6G7;H0YEG8;H0YD18;E9PM22;E9PJP3	P80303;A0A087WSV8;E9PKG6;Q2L696;E9PLR0;E9PLE9;A0A2R8Y6G7	50.222	22.2519	25.0673	35	35	34	71.4	71.4	69.5	234.61	8	43	NUCB2
SORD	Sorbitol dehydrogenase	Sorbitol dehydrogenase	Q00796;H0YKB3	Q00796	38.324	30.514	25.0409	47	47	3	99.7	99.7	10.4	323.31	123	32	SORD
IGHA1	Ig alpha-1 chain C region	Immunoglobulin heavy constant alpha 1 (Fragment);Immunoglobulin heavy constant alpha 1;Immunoglobulin heavy constant alpha 2 (Fragment)	A0A286YEY1;P01876;A0A0G2JMB2;A0A286YEY5;P01877	A0A286YEY1;P01876;A0A0G2JMB2	42.848	22.7021	24.9771	16	16	16	51.3	51.3	51.3	89.256	6	22	IGHA1
LTF	Lactotransferrin;Lactoferricin-H;Kaliocin-1;Lactoferroxin-A;Lactoferroxin-B;Lactoferroxin-C	Lactotransferrin;Lactotransferrin;Lactotransferrin (Fragment)	E7ER44;P02788;E7EQB2;C9JCF5;CON__Q29443;CON__Q0IIK2	E7ER44;P02788;E7EQB2	77.969	22.7513	24.9726	84	84	84	77.5	77.5	77.5	323.31	16	53	LTF
LIMS1	LIM and senescent cell antigen-like-containing domain protein 1;LIM and senescent cell antigen-like-containing domain protein 2	LIM and senescent cell antigen-like-containing domain protein 1;LIM and senescent cell antigen-like-containing domain protein 1 (Fragment);LIM and senescent cell antigen-like-containing domain protein 2	P48059;A0A0M3HER1;Q7Z4I7;H0Y592	P48059;A0A0M3HER1;Q7Z4I7	37.251	23.8553	24.9639	8	8	2	35.7	35.7	11.4	33.903	7	2	LIMS1
TSPAN1	Tetraspanin-1	Tetraspanin-1	O60635	O60635	26.301	27.4739	24.9614	4	4	4	15.4	15.4	15.4	17.684	7	6	TSPAN1
LAMB2	Laminin subunit beta-2	Laminin subunit beta-2	P55268;F5H520;C9JMJ0;A4D0S4	P55268	195.98	20.96	24.9186	98	98	98	59	59	59	323.31	7	94	LAMB2
PDCD6IP	Programmed cell death 6-interacting protein	Programmed cell death 6-interacting protein	Q8WUM4;A0A3B3IT07;C9IZF9;F8WEQ7;F8WBR8	Q8WUM4	96.022	27.8006	24.8996	97	97	87	75.6	75.6	68.3	323.31	121	51	PDCD6IP
CPE	Carboxypeptidase E	Carboxypeptidase E	P16870;D6RF88;C9JE88;D6R930;H0YAM0	P16870	53.15	26.8937	24.8454	32	32	32	48.9	48.9	48.9	229.96	42	32	CPE
CRISP1	Cysteine-rich secretory protein 1	Cysteine-rich secretory protein 1	P54107	P54107	28.481	18.6878	24.8395	9	9	9	31.3	31.3	31.3	67.692	0	7	CRISP1
CTSL	Cathepsin L1;Cathepsin L1 heavy chain;Cathepsin L1 light chain	Cathepsin L1;Cathepsin L1	P07711;Q5T8F0;O60911	P07711;Q5T8F0	37.564	19.7303	24.6791	12	12	12	32.4	32.4	32.4	71.732	0	12	CTSL
DAZAP2	DAZ-associated protein 2	DAZ-associated protein 2;DAZ-associated protein 2	F8VUW5;Q15038	F8VUW5;Q15038	10.802	NaN	24.6057	3	3	3	49.1	49.1	49.1	9.4697	0	4	DAZAP2
CAMP	Cathelicidin antimicrobial peptide;Antibacterial protein FALL-39;Antibacterial protein LL-37	Cathelicidin antimicrobial peptide;Cathelicidin antimicrobial peptide	J3KNB4;P49913	J3KNB4;P49913	19.591	23.3766	24.5576	11	11	11	53.8	53.8	53.8	49.169	4	10	CAMP
HINT1	Histidine triad nucleotide-binding protein 1	Histidine triad nucleotide-binding protein 1;Histidine triad nucleotide-binding protein 1;Histidine triad nucleotide-binding protein 1;Histidine triad nucleotide-binding protein 1	P49773;D6REP8;D6RE99;D6RD60;D6RC06	P49773;D6REP8;D6RE99;D6RD60	13.802	30.1199	24.497	17	17	17	91.3	91.3	91.3	177.1	56	9	HINT1
PATE1	Prostate and testis expressed protein 1	Prostate and testis expressed protein 1	Q8WXA2	Q8WXA2	14.271	23.8658	24.4881	9	9	9	55.6	55.6	55.6	26.281	4	7	PATE1
LAMC1	Laminin subunit gamma-1	Laminin subunit gamma-1	P11047;R4GNC7;Q9Y6N6	P11047	177.6	19.5776	24.4636	83	83	83	48.2	48.2	48.2	323.31	5	83	LAMC1
PRSS8	Prostasin;Prostasin light chain;Prostasin heavy chain	Prostasin	Q16651;H3BUJ8;H3BVC8	Q16651	36.431	28.3023	24.449	9	9	9	35	35	35	98.226	13	10	PRSS8
PEBP1	Phosphatidylethanolamine-binding protein 1;Hippocampal cholinergic neurostimulating peptide	Phosphatidylethanolamine-binding protein 1	P30086	P30086	21.057	30.7913	24.4172	24	24	24	96.3	96.3	96.3	323.31	63	9	PEBP1
TGM4	Protein-glutamine gamma-glutamyltransferase 4	Protein-glutamine gamma-glutamyltransferase 4	P49221;F8WCU8	P49221	77.144	27.4658	24.4042	80	80	80	95.3	95.3	95.3	323.31	85	35	TGM4
VTN	Vitronectin;Vitronectin V65 subunit;Vitronectin V10 subunit;Somatomedin-B	Vitronectin	P04004;CON__Q3ZBS7;H0YJW9	P04004	54.305	21.3071	24.3892	18	18	18	33.5	33.5	33.5	50.795	4	18	VTN
DEFA3	Neutrophil defensin 3;HP 3-56;Neutrophil defensin 2;Neutrophil defensin 1;HP 1-56;Neutrophil defensin 2	Neutrophil defensin 3;Neutrophil defensin 1	P59666;P59665	P59666;P59665	10.245	27.703	24.3882	6	6	6	26.6	26.6	26.6	16.104	3	1	DEFA3
HIST2H3A	Histone H3.2	Histone H3.2	Q71DI3	Q71DI3	15.388	22.565	24.3323	16	16	3	71.3	71.3	28.7	79.016	0	8	HIST2H3A
RAB3D	Ras-related protein Rab-3D	Ras-related protein Rab-3D	O95716;Q96E17	O95716	24.267	28.7331	24.321	24	21	17	68	64.4	47.9	287.25	62	9	RAB3D
YWHAZ	14-3-3 protein zeta/delta	14-3-3 protein zeta/delta;14-3-3 protein zeta/delta (Fragment);14-3-3 protein zeta/delta (Fragment);cDNA, FLJ79516, highly similar to 14-3-3 protein zeta/delta	P63104;E7EX29;E7ESK7;B0AZS6;E9PD24;E7EVZ2;E5RIR4;B7Z2E6;H0YB80;E5RGE1	P63104;E7EX29;E7ESK7;B0AZS6	27.745	29.758	24.3005	39	39	28	98.4	98.4	80.4	323.31	60	12	YWHAZ
TUBB4B	Tubulin beta-4B chain	Tubulin beta-4B chain	P68371	P68371	49.83	29.5817	24.2991	43	43	3	70.6	70.6	7	323.31	79	14	TUBB4B
PAEP	Glycodelin	Glycodelin (Fragment);Glycodelin (Fragment);Glycodelin (Fragment);Glycodelin;Glycodelin	H0Y4U4;H0Y6A4;Q5T6T6;A6XNE0;P09466;H0Y530;F2Z349	H0Y4U4;H0Y6A4;Q5T6T6;A6XNE0;P09466	14.952	20.2884	24.2754	10	10	10	56.5	56.5	56.5	39.604	0	8	PAEP
ANXA11	Annexin A11	Annexin A11	P50995;H0Y6E1	P50995	54.389	27.0812	24.1762	48	48	46	57.6	57.6	57.6	258.88	52	18	ANXA11
APOA4	Apolipoprotein A-IV	Apolipoprotein A-IV	P06727	P06727	45.398	20.1418	24.1532	43	43	41	68.7	68.7	65.9	127.3	0	28	APOA4
PRDX6	Peroxiredoxin-6	Peroxiredoxin-6	P30041	P30041	25.035	29.054	24.1531	35	35	35	92.4	92.4	92.4	279.41	54	10	PRDX6
SDF4	45 kDa calcium-binding protein	45 kDa calcium-binding protein;45 kDa calcium-binding protein (Fragment);45 kDa calcium-binding protein	Q9BRK5;H0Y3T6;G3V1E2	Q9BRK5;H0Y3T6;G3V1E2	41.806	19.475	24.1485	16	16	16	40.6	40.6	40.6	54.172	1	15	SDF4
MVB12A	Multivesicular body subunit 12A	Multivesicular body subunit 12A;Multivesicular body subunit 12A	Q96EY5;E9PQA6;M0QZK6;E9PLZ8;E9PLL0;E9PJW8	Q96EY5;E9PQA6	28.783	23.5504	24.1406	19	19	19	74.4	74.4	74.4	173.95	5	12	MVB12A
TMEFF2	Tomoregulin-2	Tomoregulin-2	Q9UIK5	Q9UIK5	41.428	20.5195	24.1112	9	9	9	21.7	21.7	21.7	45.568	1	9	TMEFF2
RAB3B	Ras-related protein Rab-3B	Ras-related protein Rab-3B	P20337;E9PI18;E9PJQ5;E9PRF7;E9PNB9;E9PS06;E9PMJ1;A8MSP2;A8MTC6;A8MZI4;B7Z3L0;Q15771;Q96AX2	P20337	24.758	29.069	24.0678	26	26	22	72.1	72.1	68.5	323.31	67	16	RAB3B
CFL1	Cofilin-1	Cofilin-1;Cofilin-1;Cofilin 1 (Non-muscle), isoform CRA_a	P23528;E9PK25;G3V1A4	P23528;E9PK25;G3V1A4	18.502	30.1173	24.0538	30	30	2	98.8	98.8	12	299.78	54	13	CFL1
VPS37B	Vacuolar protein sorting-associated protein 37B	Vacuolar protein sorting-associated protein 37B;Vacuolar protein sorting-associated protein 37B (Fragment);Vacuolar protein sorting-associated protein 37B (Fragment)	Q9H9H4;F5H4M0;F5H1F6	Q9H9H4;F5H4M0;F5H1F6	31.307	23.9772	23.9908	20	20	20	71.9	71.9	71.9	112.88	12	12	VPS37B
TOLLIP	Toll-interacting protein	Toll-interacting protein;Toll interacting protein, isoform CRA_b;Toll-interacting protein;Toll-interacting protein;Toll-interacting protein (Fragment)	Q9H0E2;E7EN89;F2Z2Y8;E9PP67;E9PQ25;E9PNS3	Q9H0E2;E7EN89;F2Z2Y8;E9PP67;E9PQ25	30.281	27.006	23.9878	22	22	22	70.8	70.8	70.8	83.047	28	7	TOLLIP
B2M	Beta-2-microglobulin;Beta-2-microglobulin form pI 5.3	Beta-2-microglobulin	P61769	P61769	13.714	26.0524	23.9158	7	7	2	60.5	60.5	21.8	75.451	9	6	B2M
PRDX1	Peroxiredoxin-1	Peroxiredoxin-1;Peroxiredoxin-1 (Fragment)	Q06830;A0A0A0MSI0;A0A0A0MRQ5	Q06830;A0A0A0MSI0	22.11	29.823	23.8613	35	35	32	99.5	99.5	99.5	224.64	74	10	PRDX1
HSPB1	Heat shock protein beta-1	Heat shock protein beta-1;Heat shock protein beta-1	P04792;F8WE04;C9J3N8	P04792;F8WE04	22.782	30.0663	23.8536	26	26	26	94.1	94.1	94.1	293.49	64	16	HSPB1
OS9	Protein OS-9	Protein OS-9;Protein OS-9	Q13438;B4E321;F8W1N0;F8W1V2;F8W0R2;F8VZI7	Q13438;B4E321	75.561	NaN	23.8276	21	21	21	45.3	45.3	45.3	149.46	0	26	OS9
SBSPON	Somatomedin-B and thrombospondin type-1 domain-containing protein	Somatomedin-B and thrombospondin type-1 domain-containing protein	Q8IVN8	Q8IVN8	29.61	18.892	23.8188	11	11	11	50	50	50	49.743	0	12	SBSPON
PKM	Pyruvate kinase PKM;Pyruvate kinase	Pyruvate kinase PKM;Pyruvate kinase (Fragment);Pyruvate kinase;Pyruvate kinase	P14618;H3BTN5;B4DNK4;H3BQ34;H3BR70;H3BTJ2;H3BUW1;H3BT25;H3BU13;H3BN34;H3BQZ3;P30613	P14618;H3BTN5;B4DNK4;H3BQ34	57.936	29.1355	23.8155	63	63	63	92.5	92.5	92.5	323.31	131	32	PKM
SEMA3C	Semaphorin-3C	Semaphorin-3C	Q99985;Q14563	Q99985	85.206	25.449	23.7646	35	35	33	46.2	46.2	44.5	165.74	21	23	SEMA3C
ACTB		Actin, cytoplasmic 1 (Fragment)	A0A2R8YEA7	A0A2R8YEA7	17.471	25.6544	23.7558	18	2	2	84.1	15.9	15.9	20.022	6	3	ACTB
PFN1	Profilin-1	Profilin-1;Profilin	P07737;K7EJ44;CON__P02584;I3L3D5	P07737;K7EJ44	15.054	29.5694	23.707	24	24	24	97.1	97.1	97.1	221.35	47	10	PFN1
TUBA1B	Tubulin alpha-1B chain	Tubulin alpha-1B chain	P68363;F8VVB9;F8VS66;F8VRZ4;C9JDS9;F8VX09;F8VWV9;F8VRK0;F8W0F6;C9K0S6;F8VXZ7;Q9H853	P68363	50.151	28.9949	23.7066	45	45	0	83.4	83.4	0	323.31	86	25	TUBA1B
CLIC1	Chloride intracellular channel protein 1	Chloride intracellular channel protein 1	O00299	O00299	26.922	28.2252	23.551	32	32	32	95.9	95.9	95.9	323.31	44	15	CLIC1
GAPDH	Glyceraldehyde-3-phosphate dehydrogenase	Glyceraldehyde-3-phosphate dehydrogenase;Glyceraldehyde-3-phosphate dehydrogenase	P04406;E7EUT5	P04406;E7EUT5	36.053	29.9787	23.5432	43	43	43	97.6	97.6	97.6	323.31	84	19	GAPDH
S100A11	Protein S100-A11;Protein S100-A11, N-terminally processed	Protein S100-A11	P31949	P31949	11.74	30.1598	23.5075	17	17	17	91.4	91.4	91.4	225.01	18	3	S100A11
AKR1B1	Aldose reductase	Aldose reductase;Aldose reductase	P15121;E9PCX2;E9PEF9;C9JRZ8	P15121;E9PCX2	35.853	23.7644	23.4947	16	16	16	67.7	67.7	67.7	101.91	7	15	AKR1B1
ADIRF	Adipogenesis regulatory factor	Adipogenesis regulatory factor	Q15847	Q15847	7.8547	30.2755	23.4613	9	9	8	92.1	92.1	92.1	323.31	26	1	ADIRF
TIMP1	Metalloproteinase inhibitor 1	Metalloproteinase inhibitor 1;Metalloproteinase inhibitor 1;Metalloproteinase inhibitor 1 (Fragment)	Q5H9A7;P01033;H0Y789;Q5H9B5;Q5H9B4	Q5H9A7;P01033;H0Y789	16.057	26.5297	23.4438	10	10	10	82.5	82.5	82.5	72.174	15	8	TIMP1
RHOA	Transforming protein RhoA	Transforming protein RhoA;Transforming protein RhoA;Rho-related GTP-binding protein RhoC (Fragment);Transforming protein RhoA (Fragment);Rho-related GTP-binding protein RhoC	P61586;C9JX21;Q5JR07;C9JNR4;Q5JR05;Q5JR06;E9PN11;E9PLA2	P61586;C9JX21;Q5JR07;C9JNR4;Q5JR05	21.768	29.4644	23.4256	19	19	8	76.2	76.2	28	190.24	46	7	RHOA
CD38	ADP-ribosyl cyclase/cyclic ADP-ribose hydrolase 1	ADP-ribosyl cyclase/cyclic ADP-ribose hydrolase 1	P28907;H0Y950	P28907	34.328	28.05	23.3806	26	26	26	61.3	61.3	61.3	118.66	40	10	CD38
UMAD1	UBAP1-MVB12-associated (UMA)-domain containing protein 1	UBAP1-MVB12-associated (UMA)-domain containing protein 1	C9J7I0;A0A1B0GUC2;A0A1W2PP33	C9J7I0	15.2	23.5876	23.3617	7	7	7	43.1	43.1	43.1	90.045	5	3	UMAD1
CNDP2	Cytosolic non-specific dipeptidase	Cytosolic non-specific dipeptidase;Cytosolic non-specific dipeptidase (Fragment)	Q96KP4;J3QKT2;J3KSV5;A0A087WYZ1;J3QKQ0;J3QRD0;J3QR27;J3QLU1;J3QRA8;J3QQN6;J3QL02;A0A087WVS2;J3QRH4;J3KSS4;J3QRP4;J3KRJ8	Q96KP4;J3QKT2	52.878	29.4057	23.3307	62	62	50	94.3	94.3	82.1	323.31	123	17	CNDP2
AKR1A1	Alcohol dehydrogenase [NADP(+)]	Alcohol dehydrogenase [NADP(+)]	P14550;Q5T621;V9GYG2;V9GYP9	P14550	36.573	28.5475	23.3099	43	43	43	92.9	92.9	92.9	323.31	68	11	AKR1A1
NPNT	Nephronectin	Nephronectin;Nephronectin (Fragment)	Q6UXI9;H0YAK9	Q6UXI9;H0YAK9	61.906	25.654	23.2935	22	22	3	37.5	37.5	5.3	121.5	23	19	NPNT
CPM	Carboxypeptidase M	Carboxypeptidase M;Carboxypeptidase M (Fragment)	P14384;F8W111;F8VVI6;H0YHN7;F8VR29;F8VU13	P14384;F8W111	50.513	27.3782	23.289	23	23	23	43.8	43.8	43.8	110.23	42	14	CPM
SPINT1	Kunitz-type protease inhibitor 1	Kunitz-type protease inhibitor 1;Kunitz-type protease inhibitor 1 (Fragment);Kunitz-type protease inhibitor 1 (Fragment);Kunitz-type protease inhibitor 1 (Fragment);Kunitz-type protease inhibitor 1 (Fragment)	O43278;H3BTQ8;H3BVD9;H3BSM2;H3BR01;H3BMB6;H3BNW5	O43278;H3BTQ8;H3BVD9;H3BSM2;H3BR01	58.397	26.1031	23.2741	20	20	20	26.8	26.8	26.8	131.37	17	10	SPINT1
LIPG	Endothelial lipase	Endothelial lipase;Endothelial lipase;Endothelial lipase	Q9Y5X9;J3QQQ0;B4DTR8;A0A075B751	Q9Y5X9;J3QQQ0;B4DTR8	56.794	18.0623	23.2477	10	10	10	22	22	22	46.956	0	13	LIPG
PSAP	Prosaposin;Saposin-A;Saposin-B-Val;Saposin-B;Saposin-C;Saposin-D	Prosaposin;Prosaposin;PSAP protein	C9JIZ6;P07602;Q5BJH1	C9JIZ6;P07602;Q5BJH1	58.44	21.5487	23.2438	9	9	9	24.7	24.7	24.7	44.717	8	12	PSAP
LAMA5	Laminin subunit alpha-5	Laminin subunit alpha-5	O15230;A0A087WYH7;A0A075B783;A0A0A0MSA0;Q16787	O15230	399.73	19.4607	23.1697	133	133	133	41.2	41.2	41.2	323.31	5	101	LAMA5
MUC5B	Mucin-5B	Mucin-5B	Q9HC84;P98088	Q9HC84	596.33	14.9523	23.1474	50	50	50	14.4	14.4	14.4	234.78	1	54	MUC5B
ADAM9	Disintegrin and metalloproteinase domain-containing protein 9	Disintegrin and metalloproteinase domain-containing protein 9;ADAM9 protein;Disintegrin and metalloproteinase domain-containing protein 9	Q13443;A0AVL1;F8WC54;A0A0J9YY58	Q13443;A0AVL1;F8WC54	90.555	24.5773	23.1472	36	36	36	38.5	38.5	38.5	239.86	33	18	ADAM9
FAM168A	Protein FAM168A	Protein FAM168A	Q92567	Q92567	26.184	21.0365	23.146	7	7	7	59.8	59.8	59.8	19.821	0	6	FAM168A
GANAB	Neutral alpha-glucosidase AB	Neutral alpha-glucosidase AB;Neutral alpha-glucosidase AB;Neutral alpha-glucosidase AB	Q14697;F5H6X6;E9PKU7;E9PNH1	Q14697;F5H6X6;E9PKU7	106.87	20.7379	23.1309	27	27	27	34.9	34.9	34.9	115.98	2	23	GANAB
RAB27A	Ras-related protein Rab-27A	Ras-related protein Rab-27A;Ras-related protein Rab-27A (Fragment);Ras-related protein Rab-27A (Fragment);Ras-related protein Rab-27A (Fragment);Ras-related protein Rab-27A (Fragment);Ras-related protein Rab-27A (Fragment)	P51159;H3BVH7;H3BN55;H3BUD9;H3BS49;H3BU81	P51159;H3BVH7;H3BN55;H3BUD9;H3BS49;H3BU81	24.868	27.6626	23.1305	19	15	15	59.7	50.2	50.2	96.598	27	8	RAB27A
NANS	Sialic acid synthase	Sialic acid synthase	Q9NR45;Q5TBR0;Q5TBR1	Q9NR45	40.307	28.8256	22.95	44	44	44	85.5	85.5	85.5	323.31	79	13	NANS
APOD	Apolipoprotein D	Apolipoprotein D;Apolipoprotein D (Fragment)	P05090;C9JF17;C9JX71	P05090;C9JF17	21.275	23.5867	22.929	9	9	9	41.3	41.3	41.3	107.08	3	5	APOD
PLA1A	Phospholipase A1 member A	Phospholipase A1 member A, isoform CRA_b;Phospholipase A1 member A	G5E9W0;Q53H76;H7C4H1	G5E9W0;Q53H76	48.084	20.7331	22.9239	9	9	9	22	22	22	38.028	2	10	PLA1A
DNAJC3	DnaJ homolog subfamily C member 3	DnaJ homolog subfamily C member 3;DnaJ homolog subfamily C member 3	Q13217;X6R9L0	Q13217;X6R9L0	57.579	16.0189	22.9137	25	25	25	57.9	57.9	57.9	90.323	0	24	DNAJC3
ADH5	Alcohol dehydrogenase class-3	Alcohol dehydrogenase class-3	P11766;H0YAG8;D6RFE4;D6R9G2;D6RAY0	P11766	39.724	28.1061	22.8842	35	35	35	75.4	75.4	75.4	246.96	54	14	ADH5
YWHAE	14-3-3 protein epsilon	14-3-3 protein epsilon	P62258;B4DJF2;I3L3T1;K7EIT4;K7EM20;I3L0W5	P62258	29.174	29.11	22.8803	32	29	29	83.5	79.6	79.6	218.37	53	4	YWHAE
KLC2	Kinesin light chain 2	Kinesin light chain 2;Kinesin light chain 2	Q9H0B6;A8MZ87;A8MX29;E9PP09;C9JHT2;E9PM83;E9PQ02;E9PI24	Q9H0B6;A8MZ87	68.934	27.0979	22.8719	71	71	54	79.1	79.1	63.3	323.31	98	24	KLC2
FAM129A	Protein Niban	Protein Niban	Q9BZQ8;H0Y7M9;REV__Q9UHV5;REV__A0A087WVW6	Q9BZQ8	103.13	27.993	22.8716	72	72	72	60	60	60	323.31	94	16	FAM129A
HSPA8	Heat shock cognate 71 kDa protein	Heat shock cognate 71 kDa protein	P11142;E9PLF4;E9PQQ4;E9PQK7;E9PI65	P11142	70.897	29.1567	22.8514	71	71	0	74.8	74.8	0	323.31	138	19	HSPA8
CRISPLD2	Cysteine-rich secretory protein LCCL domain-containing 2	Cysteine-rich secretory protein LCCL domain-containing 2;Cysteine-rich secretory protein LCCL domain-containing 2	H3BTI0;Q9H0B8;H3BSZ9;J3QKP2;H3BTP0	H3BTI0;Q9H0B8	55.79	22.2563	22.8471	15	15	15	50.6	50.6	50.6	85.859	4	15	CRISPLD2
CDC42SE2	CDC42 small effector protein 2	CDC42 small effector protein 2;CDC42 small effector protein 2	Q9NRR3;D6REL0	Q9NRR3;D6REL0	9.2234	27.2739	22.8256	4	4	4	90.5	90.5	90.5	40.824	5	1	CDC42SE2
CTSZ	Cathepsin Z	Cathepsin Z	Q9UBR2	Q9UBR2	33.868	22.1487	22.8141	8	8	8	18.2	18.2	18.2	18.354	1	6	CTSZ
APOA1	Apolipoprotein A-I;Proapolipoprotein A-I;Truncated apolipoprotein A-I	Apolipoprotein A-I;Apolipoprotein A-I	P02647;F8W696	P02647;F8W696	30.777	19.0993	22.8135	13	13	13	55.8	55.8	55.8	38.053	0	11	APOA1
SCPEP1	Retinoid-inducible serine carboxypeptidase	Retinoid-inducible serine carboxypeptidase	Q9HB40;I3L4Z9;I3L4Z3	Q9HB40	50.83	21.9407	22.812	8	8	6	24.3	24.3	19	28.014	5	6	SCPEP1
IGLL5	Ig lambda-1 chain C regions;Immunoglobulin lambda-like polypeptide 5	Immunoglobulin lambda constant 3;Immunoglobulin lambda constant 2;Immunoglobulin lambda-like polypeptide 5;Immunoglobulin lambda constant 1;Immunoglobulin lambda-like polypeptide 5	P0DOY3;P0DOY2;A0A0B4J231;P0CG04;B9A064;P0CF74	P0DOY3;P0DOY2;A0A0B4J231;P0CG04;B9A064	11.265	20.8934	22.7889	4	4	4	40.6	40.6	40.6	80.465	2	4	IGLL5
GCNT2	N-acetyllactosaminide beta-1,6-N-acetylglucosaminyl-transferase, isoform A	N-acetyllactosaminide beta-1,6-N-acetylglucosaminyl-transferase	Q8N0V5;B7ZBL3;A0A1W2PRW1	Q8N0V5	45.873	20.6432	22.7754	10	10	10	26.9	26.9	26.9	72.724	2	9	GCNT2
ACE	Angiotensin-converting enzyme;Angiotensin-converting enzyme, soluble form	Angiotensin-converting enzyme;Angiotensin-converting enzyme;Angiotensin-converting enzyme	A0A0A0MSN4;P12821;F6X3S4;J3KTB8;J3KTH9;J3KSQ5;J3KS28;J3QRX8;J3QLR4	A0A0A0MSN4;P12821;F6X3S4	142.42	23.083	22.7728	34	34	34	24.7	24.7	24.7	120.32	12	18	ACE
SFN	14-3-3 protein sigma	14-3-3 protein sigma	P31947	P31947	27.774	29.298	22.7363	35	30	30	92.3	89.5	89.5	323.31	58	7	SFN
NEU1	Sialidase-1	Sialidase-1;Sialidase-1	Q99519;E9PIF4	Q99519;E9PIF4	45.467	20.6992	22.7356	11	11	11	34.2	34.2	34.2	41.063	1	12	NEU1
GNB1	Guanine nucleotide-binding protein G(I)/G(S)/G(T) subunit beta-1	Guanine nucleotide-binding protein G(I)/G(S)/G(T) subunit beta-1;Guanine nucleotide-binding protein G(I)/G(S)/G(T) subunit beta-1 (Fragment);Guanine nucleotide-binding protein G(I)/G(S)/G(T) subunit beta-1	P62873;F6UT28;B3KVK2;F6X3N5;B1AKQ8;F5H8J8;F5H0S8;E9PCP0;P16520	P62873;F6UT28;B3KVK2	37.377	28.8321	22.6996	28	28	16	69.1	69.1	37.9	323.31	47	12	GNB1
ORM1	Alpha-1-acid glycoprotein 1	Alpha-1-acid glycoprotein 1	P02763	P02763	23.511	26.9556	22.6786	8	8	6	29.4	29.4	23.4	24.003	16	3	ORM1
PHGDH	D-3-phosphoglycerate dehydrogenase	D-3-phosphoglycerate dehydrogenase;D-3-phosphoglycerate dehydrogenase;D-3-phosphoglycerate dehydrogenase;D-3-phosphoglycerate dehydrogenase;D-3-phosphoglycerate dehydrogenase;D-3-phosphoglycerate dehydrogenase (Fragment)	A0A286YF22;O43175;A0A2C9F2M7;A0A286YFL2;A0A286YFA2;A0A286YFM8;A0A286YFC8;A0A286YFB2;A0A286YER3;A0A286YF78;A0A286YF34;A0A286YFE1;A0A286YFF3;A0A286YFK5	A0A286YF22;O43175;A0A2C9F2M7;A0A286YFL2;A0A286YFA2;A0A286YFM8	55.938	28.7446	22.6407	43	43	43	66.7	66.7	66.7	323.31	76	13	PHGDH
PSMA7	Proteasome subunit alpha type-7	Proteasome subunit alpha type-7;Proteasome endopeptidase complex (Fragment)	O14818;H0Y586;Q8TAA3;A0A087WYS6;F5GY34	O14818;H0Y586	27.887	26.1149	22.6319	21	21	21	64.1	64.1	64.1	175.35	25	11	PSMA7
KLC4	Kinesin light chain 4	Kinesin light chain 4	Q9NSK0;C9J8T5;H7C4M1;C9JXT5;C9JQU1;C9K0D5	Q9NSK0	68.639	26.9095	22.618	67	62	50	81.4	79.6	65.1	323.31	96	22	KLC4
IGKC	Ig kappa chain C region	Immunoglobulin kappa constant	P01834	P01834	11.765	21.421	22.5874	5	5	5	72.9	72.9	72.9	29.351	1	3	IGKC
PGAM1	Phosphoglycerate mutase 1	Phosphoglycerate mutase 1	P18669;Q8N0Y7;P15259	P18669	28.804	28.8979	22.5868	35	35	35	79.5	79.5	79.5	267.38	64	6	PGAM1
PHPT1	14 kDa phosphohistidine phosphatase	14 kDa phosphohistidine phosphatase	Q9NRX4	Q9NRX4	13.832	28.5379	22.5807	17	17	17	90.4	90.4	90.4	180.05	48	2	PHPT1
ANXA1	Annexin A1;Annexin	Annexin A1;Annexin (Fragment)	P04083;Q5T3N1;Q5T3N0	P04083;Q5T3N1	38.714	30.6607	22.572	67	67	67	96.8	96.8	96.8	323.31	128	10	ANXA1
TSTD1	Thiosulfate sulfurtransferase/rhodanese-like domain-containing protein 1	Thiosulfate:glutathione sulfurtransferase;Thiosulfate:glutathione sulfurtransferase	Q8NFU3;R4GNF9	Q8NFU3;R4GNF9	12.53	28.3135	22.5526	10	10	10	93	93	93	41.903	11	3	TSTD1
HIST1H4A	Histone H4	Histone H4	P62805	P62805	11.367	20.8613	22.5233	15	15	15	58.3	58.3	58.3	51.42	0	4	HIST1H4A
HSP90B1	Endoplasmin	Endoplasmin	P14625;Q96GW1;A0A1W2PRR1;H0YIV0;F8W026;Q58FF3	P14625	92.468	21.6657	22.4993	36	33	33	49.3	47.6	47.6	111.29	6	27	HSP90B1
UXS1	UDP-glucuronic acid decarboxylase 1	UDP-glucuronic acid decarboxylase 1;UDP-glucuronic acid decarboxylase 1 (Fragment);UDP-glucuronic acid decarboxylase 1 (Fragment);UDP-glucuronic acid decarboxylase 1 (Fragment);UDP-glucuronic acid decarboxylase 1 (Fragment)	Q8NBZ7;C9JCB7;C9JFU6;C9JE50;C9JW33;C9J3T9	Q8NBZ7;C9JCB7;C9JFU6;C9JE50;C9JW33	47.576	19.3261	22.4856	8	8	8	34.3	34.3	34.3	49.999	0	5	UXS1
NDRG1	Protein NDRG1	Protein NDRG1;Protein NDRG1	Q92597;E7ESM1;E5RJY1;E5RIR1;E5RGM5;E5RIM2;E5RI76;E5RIV1;E5RJ98;E5RH82;E5RK17;E5RG99	Q92597;E7ESM1	42.835	29.0925	22.4727	23	23	23	62.2	62.2	62.2	225.55	57	7	NDRG1
HSP90AA1	Heat shock protein HSP 90-alpha	Heat shock protein HSP 90-alpha	P07900;G3V2J8;Q14568;Q58FG0	P07900	84.659	28.5468	22.4574	76	76	59	70.5	70.5	56.3	323.31	136	11	HSP90AA1
GLO1	Lactoylglutathione lyase	Lactoylglutathione lyase	Q04760	Q04760	20.777	29.3765	22.4551	24	24	24	96.7	96.7	96.7	135.48	35	9	GLO1
SOD1	Superoxide dismutase [Cu-Zn]	Superoxide dismutase [Cu-Zn];Superoxide dismutase [Cu-Zn]	P00441;H7BYH4	P00441;H7BYH4	15.936	29.5666	22.4119	16	16	16	96.1	96.1	96.1	323.31	35	2	SOD1
YWHAQ	14-3-3 protein theta	14-3-3 protein theta	P27348	P27348	27.764	28.736	22.4079	33	27	3	78.4	70.6	20.4	281.02	43	6	YWHAQ
GPRC5B	G-protein coupled receptor family C group 5 member B	G-protein coupled receptor family C group 5 member B	Q9NZH0	Q9NZH0	44.794	24.3204	22.3808	5	5	5	14.9	14.9	14.9	29.997	4	4	GPRC5B
SMS	Spermine synthase	Spermine synthase	P52788;H7C2R7	P52788	41.268	28.2467	22.3673	34	34	34	96.7	96.7	96.7	323.31	54	9	SMS
VWA1	von Willebrand factor A domain-containing protein 1	von Willebrand factor A domain-containing protein 1;von Willebrand factor A domain-containing protein 1 (Fragment)	Q6PCB0;J3QLP3;J3QRR0	Q6PCB0;J3QLP3	46.804	17.9957	22.2855	11	11	11	35.1	35.1	35.1	41.831	0	8	VWA1
TPI1	Triosephosphate isomerase	Triosephosphate isomerase;Triosephosphate isomerase (Fragment)	P60174;U3KPZ0;U3KQF3;U3KPS5	P60174;U3KPZ0	30.791	29.7487	22.2817	42	42	42	81.8	81.8	81.8	323.31	85	7	TPI1
BANF1	Barrier-to-autointegration factor;Barrier-to-autointegration factor, N-terminally processed	Barrier-to-autointegration factor	O75531	O75531	10.058	27.2891	22.2429	10	10	10	84.3	84.3	84.3	45.933	20	5	BANF1
DSTN	Destrin	Destrin;Destrin	P60981;F6RFD5	P60981;F6RFD5	18.506	28.0264	22.2406	22	18	18	84.2	77	77	136.89	34	6	DSTN
GNB2	Guanine nucleotide-binding protein G(I)/G(S)/G(T) subunit beta-2	Guanine nucleotide-binding protein G(I)/G(S)/G(T) subunit beta-2;Guanine nucleotide-binding protein G(I)/G(S)/G(T) subunit beta-2;Guanine nucleotide-binding protein G(I)/G(S)/G(T) subunit beta-2 (Fragment);Guanine nucleotide-binding protein G(I)/G(S)/G(T)	P62879;E7EP32;C9JXA5;C9JZN1	P62879;E7EP32;C9JXA5;C9JZN1	37.331	28.0718	22.2377	27	16	5	77.1	55	23.5	162.28	27	6	GNB2
DCD	Dermcidin;Survival-promoting peptide;DCD-1	Dermcidin	P81605	P81605	11.284	24.6999	22.2376	5	5	5	43.6	43.6	43.6	13.536	4	4	DCD
C11orf52	Uncharacterized protein C11orf52	Uncharacterized protein C11orf52	Q96A22;E9PPX5	Q96A22	13.92	23.2343	22.2355	9	9	9	82.1	82.1	82.1	23.477	6	5	C11orf52
NUCB1	Nucleobindin-1	Nucleobindin-1;Nucleobindin-1 (Fragment);Nucleobindin-1 (Fragment)	Q02818;C9JKZ2;H7BZI1;C9JBD3;C9J3C1	Q02818;C9JKZ2;H7BZI1	53.879	21.0998	22.2218	21	20	20	44	42.3	42.3	51.93	1	14	NUCB1
NT5E	5-nucleotidase	5-nucleotidase;5-nucleotidase	P21589;Q96B60;H0Y7R7;H0Y3X5	P21589;Q96B60	63.367	23.8581	22.2203	26	26	26	52.1	52.1	52.1	155.12	14	13	NT5E
SLC9A3R2	Na(+)/H(+) exchange regulatory cofactor NHE-RF2	Na(+)/H(+) exchange regulatory cofactor NHE-RF2	Q15599;H3BN50;H3BQS0;H3BUQ9;H3BMF5	Q15599	37.413	25.2535	22.2082	18	18	18	48.4	48.4	48.4	70.129	19	6	SLC9A3R2
CD81	Tetraspanin;CD81 antigen	Tetraspanin;Tetraspanin (Fragment);Tetraspanin (Fragment);Tetraspanin (Fragment);Tetraspanin;Tetraspanin;CD81 antigen	E9PJK1;E9PRJ8;H0YDL9;H0YDJ9;E9PIF1;A6NMH8;P60033	E9PJK1;E9PRJ8;H0YDL9;H0YDJ9;E9PIF1;A6NMH8;P60033	17.963	25.2331	22.2045	4	4	3	38.2	38.2	26.1	40.299	5	5	CD81
[truncated: 722 more rows]

## Sheet: exp-1 LEV specific
T: Gene names	T: Protein names	T: Fasta headers	T: Protein IDs	T: Majority protein IDs	N: Mol. weight [kDa]	iBAQ EXP-1-LEV only	iBAQ EXP-1-SEV	N: Peptides	N: Razor + unique peptides	N: Unique peptides	N: Sequence coverage [%]	N: Unique + razor sequence coverage [%]	N: Unique sequence coverage [%]	N: Score	N: MS/MS count exp1 LEV	N: MS/MS count exp1 SEV	T: Gene names
[truncated: 682 more rows]

[truncated: 7 more sheets: exp-1-SEV specific, exp-1-shared, exp-2-LEV total, exp-2-SEV total, exp-2-LEV specific, exp-2-SEV specific, exp-2-shared]
